# Supplementary material
Source: Royal Society of Chemistry journal article supplement (doi:10.1039/d6ob00521g)
Supplement: d6ob00521g1.pdf [file d6ob00521g1.pdf]

## Supporting Information

### One-Pot Click Chemistry using Hydrazine as Azide Surrogate: Easy access to 1,2,3-Triazole Functionalities

Muzamil Samad,<sup>a,b</sup> Mohd Irfan,<sup>a</sup> Riyaz Ahmed,<sup>a,b</sup> Zaheen Akhter,<sup>a,b</sup> Vijay Kumar,<sup>a,b</sup> and Parvinder Pal Singh<sup>a,b,\*</sup>

<sup>a</sup>Natural Product & Medicinal Chemistry Division, CSIR-Indian Institute of Integrative Medicine, Canal Road, Jammu-180001, India.

<sup>b</sup>Academy of Scientific and Innovative Research, (AcSIR), Ghaziabad-201002, India.

### Table of Content

| S. No. | Contents                                                                                                                          | Page No. |
|--------|-----------------------------------------------------------------------------------------------------------------------------------|----------|
| 1.     | Representative picture of 1,2,3-triazole containing drugs and clinical candidates                                                 | S3       |
| 2.     | General information                                                                                                               | S4       |
| 2.     | General Procedure for one pot conversion of aryl hydrazine hydrochloride to 1,2,3-triazoles ( <b>3a-3ac</b> , Table 1, Scheme 1). | S5       |
| 3.     | Spectral data of compounds <b>3a-3ac</b> .                                                                                        | S5-S14   |
| 4.     | General Procedure for one pot conversion of aryl hydrazine hydrochloride to 1,2,3-triazoles ( <b>4a-4f</b> , Scheme 2).           | S15      |
| 5.     | Spectral data of compounds <b>4a-4f</b> .                                                                                         | S15-S17  |
| 6.     | General Procedure for one pot conversion of aryl hydrazine hydrochloride to 1,2,3-triazoles ( <b>5a-5c</b> , Scheme 3).           | S17      |
| 7.     | Spectral data of compounds <b>5a-5c</b> .                                                                                         | S17-S18  |
| 8.     | General procedure for late-stage functionalization of natural products ( <b>6a-6e</b> , Scheme 4).                                | S19      |
| 9.     | Spectral data of compounds <b>6a-6e</b> .                                                                                         | S18-S20  |
| 10.    | Procedure for gram scale reaction.                                                                                                | S21      |
| 11.    | Calculation of Green Metrics                                                                                                      | S22-S27  |
| 12.    | Spectral copies of <sup>1</sup> H-NMR, <sup>13</sup> C-NMR, DEPT of <b>3a-3ac</b> .                                               | S28-S91  |

|     |                                                                                    |           |
|-----|------------------------------------------------------------------------------------|-----------|
| 13. | Spectral copies of $^1\text{H-NMR}$ , $^{13}\text{C-NMR}$ , DEPT of <b>4a-4f</b> . | S92-S104  |
| 13. | Spectral copies of $^1\text{H-NMR}$ , $^{13}\text{C-NMR}$ , DEPT of <b>5a-5c</b> . | S105-S111 |
| 14. | Spectral copies of $^1\text{H-NMR}$ , $^{13}\text{C-NMR}$ , DEPT of <b>6a-6e</b> . | S112-S120 |
| 15. | References                                                                         | S121      |

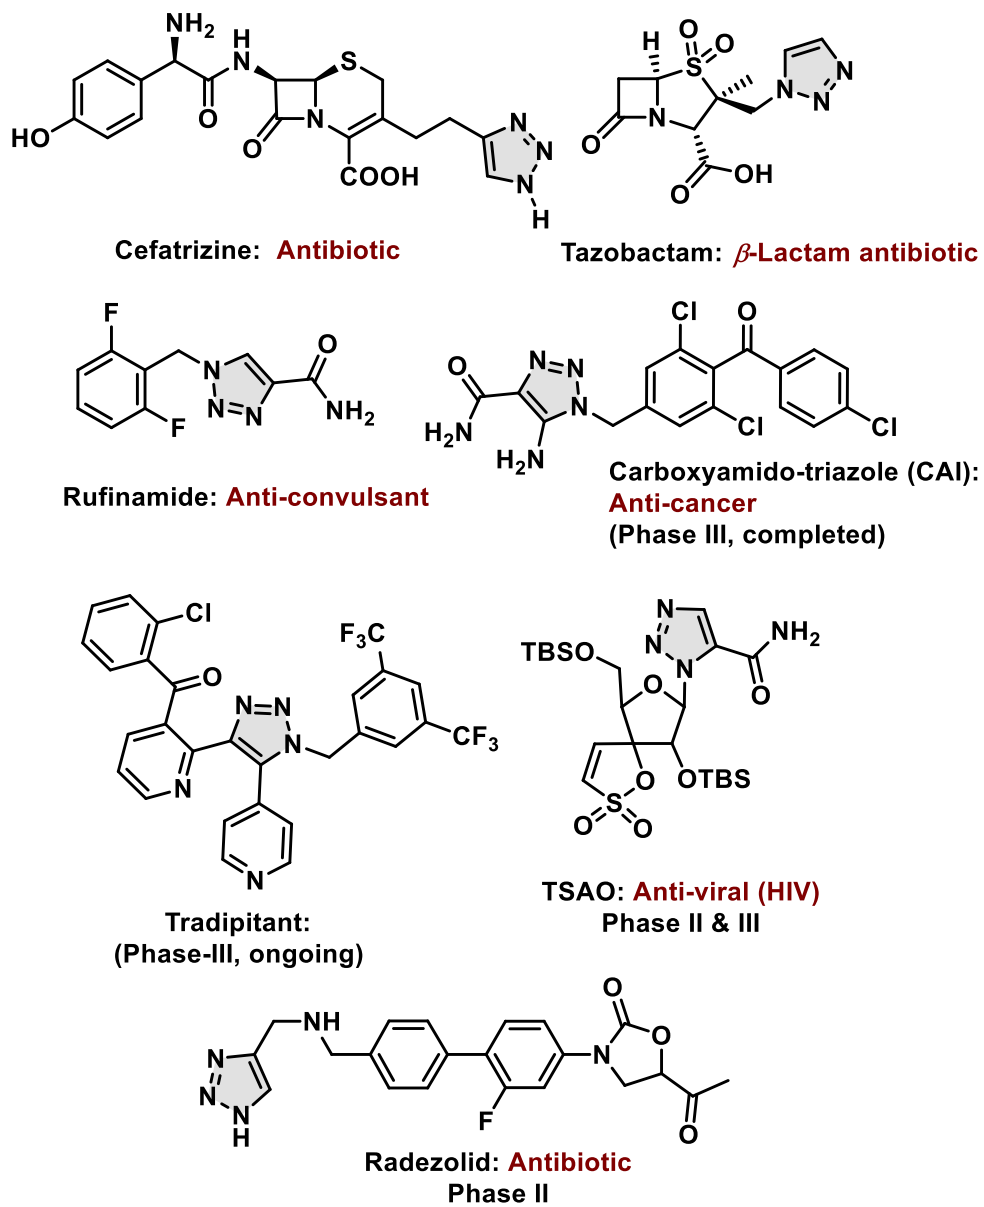

Figure S1: Representative picture of 1,2,3-triazole containing drugs and clinical candidates

## EXPERIMENTAL SECTION

### General Information

All reactions are carried out in round bottom flask in open atmosphere and reaction mixture was monitored by thin-layer chromatography (TLC). TLC pre-coated silica gel 60 F254 (20 × 20 cm). TLC plates are visualized by exposing UV light. Organic solvents are evaporated on rotary evaporator and all the compounds are purified on flash Column chromatography (230–400 mesh size). Mass spectra are obtained using an Agilent 6540 accurate mass Q-TOF LC/MS (135 eV) spectrometer, using electrospray ionization (ESI). <sup>1</sup>H NMR spectra are recorded on 400 and 500 MHz NMR instruments. Chemical data for protons are reported in parts per million (ppm, scale) downfield from tetramethylsilane as referenced to the residual proton in the NMR solvent (CDCl<sub>3</sub>: δ 7.26, 1.56 CDCl<sub>3</sub> moisture and 1.25 grease peak, DMSO-d<sub>6</sub>: δ 2.51, 3.33 DMSO-d<sub>6</sub> moisture or other solvents as mentioned). All the NMR spectras are processed with MestReNova software. The coupling constant (*J*) are in Hz. ESI-MS and HRMS spectra are recorded on LC-Q-TOF machines.

### Precautionary note:

*Although we have not experienced any problems in the handling of azides or diazo reagents, care should be taken when manipulating them due to their potentially explosive nature.*

## General Procedure for one pot conversion of aryl hydrazine hydrochloride to 1,2,3-triazoles (3a-3ac, Table 1, Scheme 1).

To an oven-dried 100 ml round bottom flask charged with a magnetic stir bar was added aryl hydrazine hydrochloride **1** (100 mg, 0.574-0.694 mmol, 1 equiv.) followed by *tert.* Butyl nitrite (1 equiv.) in PEG-400:H<sub>2</sub>O (5 mL, 2:1) was stirred at 0 °C for 30 minutes. The progress of the reaction was observed using TLC to monitor the conversion of aryl hydrazine hydrochloride to phenyl azide (*in situ*) **2**. Then alkyne (1.0 equiv.) followed by CuSO<sub>4</sub> · 5H<sub>2</sub>O (0.1 equiv.) and Sod. Ascorbate (0.05 equiv.) were added to the reaction mixture. The reaction mixture was warmed to room temperature and the stirring was continued for 8-12 h overnight after the reaction was complete as monitored by TLC. The reaction mixture was diluted with H<sub>2</sub>O, and the precipitate formed was filtered and dried *in vacuo* to afford the corresponding triazoles **3** (**3a-3ac**).

### Experimental data:

#### 1,4-Diphenyl-1*H*-1,2,3-triazole<sup>1,2</sup>(3a)

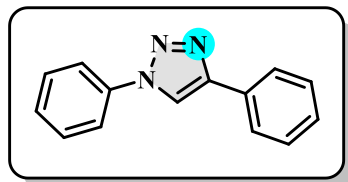

(Phenylhydrazine hydrogen chloride, 100 mg, 0.694 mmol); TLC (Hexane/EtOAc, 6:4);  $R_f = 0.6$ ; Yield 147 mg, 95%; yellow solid; m.p 185-190 °C; <sup>1</sup>H NMR (400 MHz, DMSO)  $\delta$  9.31 (s, 1H), 7.97 (m, 4H), 7.67 – 7.62 (m, 2H), 7.55 – 7.48 (m, 3H), 7.42 – 7.37 (m, 1H). <sup>13</sup>C NMR (101 MHz, DMSO)  $\delta$  147.8, 137.1, 130.7, 130.4, 129.4, 129.1, 128.7, 125.8, 120.4, 120.0; HRMS (ESI+TOF) calcd. for: C<sub>14</sub>H<sub>12</sub>N<sub>3</sub> 222.1031 [M+H]<sup>+</sup>, found 222.1036.

#### 1-Phenyl-4-(*p*-tolyl)-1*H*-1,2,3-triazole<sup>2,3</sup> (3b)

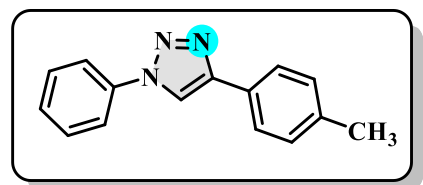

(Phenylhydrazine hydrogen chloride, 100 mg, 0.574 mmol); TLC (Hexane/EtOAc, 6:4);  $R_f = 0.4$ ; Yield 158 mg, 96%; brown solid; m.p 142-148 °C; <sup>1</sup>H NMR (400 MHz, DMSO)  $\delta$  9.19 (s, 1H), 7.97 – 7.94 (m, 2H), 7.88 (d,  $J = 8.9$  Hz, 2H), 7.64 (t,  $J = 7.9$  Hz, 2H), 7.53 – 7.49 (m, 1H), 7.08 (d,  $J = 8.9$  Hz, 2H), 3.82 (s, 3H); <sup>13</sup>C NMR (101 MHz, DMSO)  $\delta$  159.7, 147.7, 137.1, 130.4, 129.0, 127.1, 123.2, 120.3, 119.0, 114.8, 55.6; HRMS (ESI+TOF) calcd. for: C<sub>15</sub>H<sub>14</sub>N<sub>3</sub> 236.1188 [M+H]<sup>+</sup>, found 236.1196.

#### 4-(4-Ethylphenyl)-1-phenyl-1*H*-1,2,3-triazole (3c)

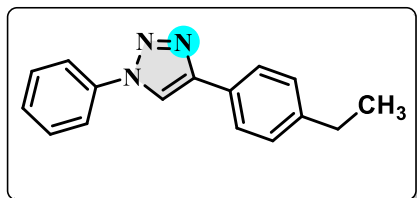

(Phenylhydrazine hydrogen chloride 100 mg, 0.694 mmol); TLC (Hexane/EtOAc, 6:4);  $R_f = 0.4$ ; Yield 161 mg, 93%; brown solid; m.p 145-150 °C;  $^1\text{H}$  NMR (400 MHz, DMSO)  $\delta$  9.26 (s, 1H), 7.98 – 7.94 (m, 2H), 7.89 – 7.85 (m, 2H), 7.68 – 7.61 (m, 2H), 7.53 (dd,  $J = 10.6, 4.3$  Hz, 1H), 7.35 (d,  $J = 8.4$  Hz, 2H), 2.66 (q,  $J = 7.6$  Hz, 2H), 1.22 (t,  $J = 7.6$  Hz, 3H);  $^{13}\text{C}$  NMR (101 MHz, DMSO)  $\delta$  147.8, 144.4, 137.1, 130.4, 129.1, 128.8, 128.2, 125.8, 120.4, 119.6, 28.4, 15.9; HRMS (ESI+TOF) calcd. for:  $\text{C}_{16}\text{H}_{16}\text{N}_3$  250.1344  $[\text{M}+\text{H}]^+$ , found 250.1345.

#### 4-(4-Butylphenyl)-1-phenyl-1*H*-1,2,3-triazole (3d)

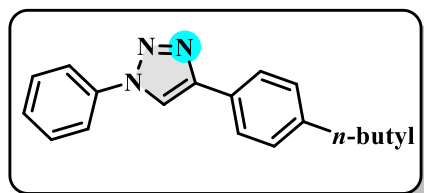

(Phenylhydrazine hydrogen chloride 100 mg, 0.694 mmol); TLC (Hexane/EtOAc, 6:4);  $R_f = 0.4$ ; Yield 176 mg, 91%; yellow solid; m.p 153-158 °C;  $^1\text{H}$  NMR (400 MHz, DMSO)  $\delta$  9.26 (s, 1H), 8.01 – 7.93 (m, 2H), 7.86 (d,  $J = 8.2$  Hz, 2H), 7.64 (t,  $J = 7.9$  Hz, 2H), 7.52 (t,  $J = 7.4$  Hz, 1H), 7.32 (d,  $J = 8.3$  Hz, 2H), 2.67 – 2.58 (m, 2H), 1.59 (dq,  $J = 12.9, 7.5$  Hz, 2H), 1.39 – 1.27 (m, 2H), 0.91 (t,  $J = 7.3$  Hz, 3H);  $^{13}\text{C}$  NMR (101 MHz, DMSO)  $\delta$  147.9, 143.0, 137.1, 130.4, 129.3, 129.1, 128.1, 125.7, 120.4, 119.6, 35.0, 33.5, 22.2, 14.2. HRMS (ESI+TOF) calcd. for:  $\text{C}_{18}\text{H}_{20}\text{N}_3$  278.1657  $[\text{M}+\text{H}]^+$ , found 278.1652.

#### 4-(4-Methoxyphenyl)-1-phenyl-1*H*-1,2,3-triazole (3e)

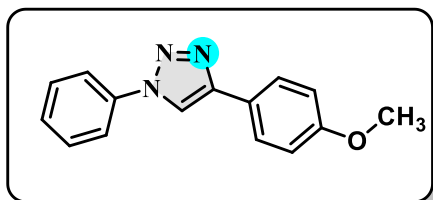

(Phenylhydrazine hydrogen chloride, 100 mg, 0.694 mmol); TLC (Hexane/EtOAc, 6:4)  $R_f = 0.4$ ; Yield 167 mg, 95%; yellow solid; m.p 141-147 °C;  $^1\text{H}$  NMR (400 MHz, DMSO- $d_6$ )  $\delta$  9.19 (s, 1H), 7.95 (dd,  $J = 8.5, 1.0$  Hz, 2H), 7.89 (d,  $J = 8.8$  Hz, 2H), 7.67 – 7.58 (m, 2H), 7.51 (t,  $J = 8$  Hz, 1H), 7.07 (d,  $J = 8.9$  Hz, 2H), 3.81 (s, 3H);  $^{13}\text{C}$  NMR (101 MHz, DMSO)  $\delta$  159.7, 147.7, 137.1, 130.3, 129.0, 127.1, 123.2, 120.3, 119.0, 114.8, 55.6; HRMS (ESI+TOF) calcd. for:  $\text{C}_{15}\text{H}_{14}\text{N}_3\text{O}$  252.1137  $[\text{M}+\text{H}]^+$ , found 252.1135.

#### 4-(3-Chlorophenyl)-1-phenyl-1*H*-1,2,3-triazole<sup>2</sup> (3f)

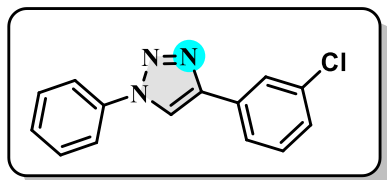

(Phenylhydrazine hydrogen chloride, 100 mg, 0.694 mmol); TLC (Hexane/EtOAc, 6:4);  $R_f = 0.4$ ; Yield 156 mg, 88%; pale yellow solid; m.p 142-147 °C;  $^1\text{H}$  NMR (400 MHz, DMSO)  $\delta$  9.39 (s, 1H), 7.99 (t,  $J = 1.7$  Hz, 1H), 7.96 – 7.91 (m, 3H), 7.64 (dd,  $J = 8.5, 7.2$  Hz, 2H), 7.57 – 7.51 (m, 2H), 7.45 (ddd,  $J = 8.0, 2.1, 1.1$  Hz, 1H);  $^{13}\text{C}$  NMR (101 MHz, DMSO)  $\delta$  146.4, 136.9, 134.2, 132.7, 131.4, 130.4, 129.3, 128.5, 125.3, 124.2, 120.8, 120.4; HRMS (ESI+TOF) calcd. for:  $\text{C}_{14}\text{H}_{11}\text{N}_3\text{Cl}$  256.0641  $[\text{M}+\text{H}]^+$ , found 256.0641.

#### 4-(4-Bromophenyl)-1-phenyl-1*H*-1,2,3-triazole (3g)

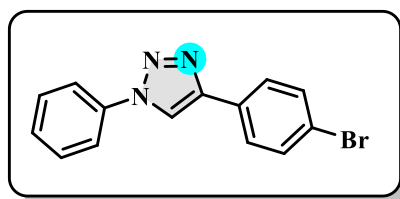

(Phenylhydrazine hydrogen chloride, 100 mg, 0.694 mmol); TLC (Hexane/EtOAc, 6:4);  $R_f = 0.4$ ; Yield 191 mg, 92%; pale yellow solid; m.p 135-139 °C;  $^1\text{H}$  NMR (400 MHz, DMSO)  $\delta$  9.35 (s, 1H), 7.96 – 7.89 (m, 4H), 7.71 (d,  $J = 8.6$  Hz, 2H), 7.64 (t,  $J = 7.9$  Hz, 2H), 7.53 (ddd,  $J = 8.5, 2.2, 1.1$  Hz, 1H);  $^{13}\text{C}$  NMR (101 MHz, DMSO)  $\delta$  146.7, 136.9, 132.4, 130.4, 129.9, 129.3, 127.7, 121.7, 120.5, 120.4; HRMS (ESI+TOF) calcd. for:  $\text{C}_{14}\text{H}_{11}\text{N}_3\text{Br}$  300.0125  $[\text{M}+\text{H}]^+$ , found 300.0125.

#### 4-(3-Fluorophenyl)-1-phenyl-1*H*-1,2,3-triazole (3h)

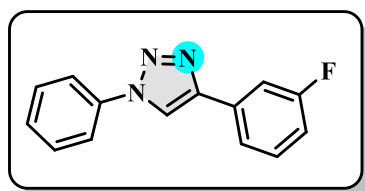

(Phenylhydrazine hydrogen chloride, 100 mg, 0.694 mmol); TLC (Hexane/EtOAc, 6:4);  $R_f = 0.4$ ; Yield 152 mg, 91%; white solid; m.p 146-152 °C;  $^1\text{H}$  NMR (400 MHz, DMSO)  $\delta$  9.39 (s, 1H), 7.97 – 7.94 (m, 2H), 7.82 (d,  $J = 7.8$  Hz, 1H), 7.75 (d,  $J = 9.2$  Hz, 1H), 7.65 (t,  $J = 7.8$  Hz, 2H), 7.55 (dd,  $J = 14.5, 6.9$  Hz, 2H), 7.23 (t,  $J = 8.6$  Hz, 1H);  $^{13}\text{C}$  NMR (101 MHz, DMSO)  $\delta$  164.2, 161.8, 146.7, 137.0, 133.1, 133.0, 131.7, 131.6, 130.4, 129.3, 121.8, 121.8, 120.8, 120.5, 115.5, 115.3, 112.5, 112.2;  $^{19}\text{F}$  NMR (400 MHz, DMSO)  $\delta$  -112.5; HRMS (ESI+TOF) calcd. for:  $\text{C}_{14}\text{H}_{11}\text{N}_3\text{F}$  240.0942  $[\text{M}+\text{H}]^+$ , found 240.0943.

#### 4-(3,5-Difluorophenyl)-1-phenyl-1*H*-1,2,3-triazole (3i)

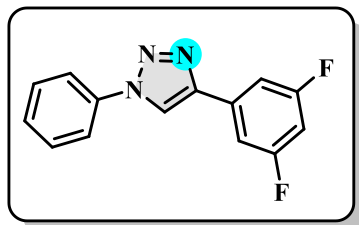

(Phenylhydrazine hydrogen chloride, 100 mg, 0.694 mmol); TLC (Hexane/EtOAc, 6:4);  $R_f = 0.4$ ; Yield 157 mg, 88%; pale yellow solid; m.p 202-207 °C;  $^1\text{H}$  NMR (400 MHz, DMSO)  $\delta$  9.26 (s, 1H), 7.77 – 7.74 (m, 2H), 7.48 (ddd,  $J = 5.5, 4.6, 3.5$  Hz, 4H), 7.40 – 7.36 (m, 1H), 7.10 (ddd,  $J = 9.4, 5.9, 2.4$  Hz, 1H);  $^{19}\text{F}$  NMR (377 MHz, DMSO)  $\delta$  -108.99;  $^{13}\text{C}$  NMR (101 MHz, DMSO)  $\delta$  164.6, 164.5, 162.2, 162.1, 145.7, 136.8, 134.3-134.0 (t,  $J = 10$  Hz), 130.4, 129.4, 121.5, 120.5, 108.8, 108.7, 108.67, 108.60, 104.1-103.6 (t,  $J = 2626$  Hz); HRMS (ESI+TOF) calcd. for:  $\text{C}_{14}\text{H}_{10}\text{N}_3\text{O}_2$  258.0843  $[\text{M}+\text{H}]^+$ , found 258.0839.

#### 4-(3,5-Bis(trifluoromethyl)phenyl)-1-phenyl-1*H*-1,2,3-triazole (3j)

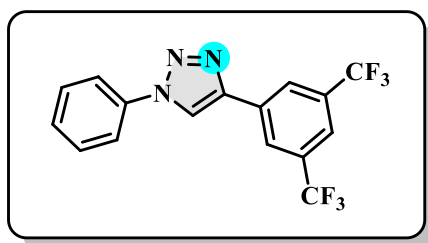

(Phenylhydrazine hydrogen chloride, 100 mg, 0.694 mmol); TLC (Hexane/EtOAc, 6:4);  $R_f = 0.4$ ; Yield 206 mg, 83%; white solid; m.p 223-228 °C;  $^1\text{H}$  NMR (400 MHz, DMSO)  $\delta$  9.46 (s, 1H), 8.36 (s, 2H), 7.89 (s, 1H), 7.77 – 7.74 (m, 2H), 7.49 – 7.45 (m, 2H), 7.38 – 7.34 (m, 1H);  $^{19}\text{F}$  NMR (400 MHz, DMSO)  $\delta$  -61.7;  $^{13}\text{C}$  NMR (101 MHz, DMSO)  $\delta$  164.6, 164.5, 162.2, 162.1, 145.7, 136.8, 134.3, 134.2, 134.0, 130.4, 129.4, 121.5, 120.5, 108.8, 108.7, 108.6, 108.6, 104.1, 103.9, 103.6; HRMS (ESI+TOF) calcd. for:  $\text{C}_{16}\text{H}_{10}\text{N}_3\text{F}_6$  358.0779  $[\text{M}+\text{H}]^+$ , found 358.0773.

#### 1-(4-Methoxyphenyl)-4-phenyl-1*H*-1,2,3-triazole<sup>1,4</sup> (3k)

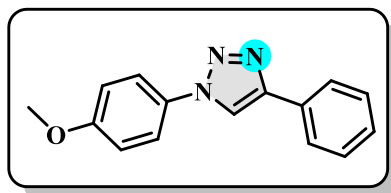

(4-Methoxyphenyl)hydrazine hydrogen chloride, 100 mg, 0.574 mmol); TLC (Hexane/EtOAc, 6:4);  $R_f = 0.4$ ; Yield 129 mg, 92%; white solid; m.p 187–193 °C;  $^1\text{H}$  NMR (400 MHz, DMSO)  $\delta$  9.21 (s, 1H), 7.97 – 7.93 (m, 2H), 7.87 (d,  $J = 9.1$  Hz, 2H), 7.50 (t,  $J = 7.6$  Hz, 2H), 7.41 – 7.36 (m, 1H), 7.18 (d,  $J = 9.1$  Hz, 2H), 3.85 (s, 3H);  $^{13}\text{C}$  NMR (101 MHz, DMSO)  $\delta$  159.7, 147.5, 130.8, 130.5, 129.4, 128.6, 125.7, 122.1, 120.0, 115.3, 56.0; HRMS (ESI+TOF) calcd. for:  $\text{C}_{15}\text{H}_{14}\text{N}_3\text{O}$  252.1137  $[\text{M}+\text{H}]^+$ , found 252.1135.

### 1-(4-methoxyphenyl)-4-(*p*-tolyl)-1*H*-1,2,3-triazole (3l)

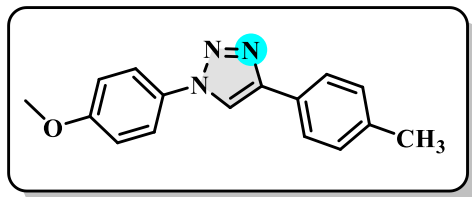

(4-Methoxyphenyl)hydrazine hydrogen chloride, 100 mg, 0.574 mmol); TLC (Hexane/EtOAc, 6:4);  $R_f = 0.4$ ; Yield 130 mg, 85%; pale yellow solid; m.p 174-177 °C;  $^1\text{H}$  NMR (400 MHz, DMSO)  $\delta$  9.14 (s, 1H), 7.84 (t,  $J = 8.8$  Hz, 4H), 7.30 (d,  $J = 7.8$  Hz, 2H), 7.17 (d,  $J = 9.0$  Hz, 2H), 3.84 (s, 3H), 2.35 (s, 3H);  $^{13}\text{C}$  NMR (101 MHz, DMSO)  $\delta$  159.7, 147.6, 137.9, 130.5, 129.9, 128.0, 125.7, 122.0, 119.6, 115.3, 56.0, 21.3; HRMS (ESI+TOF) calcd. for:  $\text{C}_{16}\text{H}_{16}\text{N}_3\text{O}$  266.1293  $[\text{M}+\text{H}]^+$ , found 266.1283.

### 4-(4-Ethylphenyl)-1-(4-methoxyphenyl)-1*H*-1,2,3-triazole (3m)

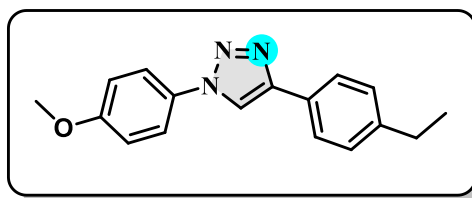

(4-Methoxyphenyl)hydrazine hydrogen chloride, 100 mg, 0.574 mmol); TLC (Hexane/EtOAc, 6:4);  $R_f = 0.4$ ; Yield 145 mg, 90%; white solid; m.p 178-183 °C;  $^1\text{H}$  NMR (400 MHz, DMSO)  $\delta$  9.14 (s, 1H), 7.86 (dd,  $J = 8.7, 2.2$  Hz, 4H), 7.39 – 7.28 (m, 2H), 7.17 (d,  $J = 9.1$  Hz, 2H), 3.84 (s, 3H), 2.64 (q,  $J = 8$  Hz, 12 Hz, 2H), 1.21 (t,  $J = 7.6$  Hz, 3H);  $^{13}\text{C}$  NMR (101 MHz, DMSO)  $\delta$  159.7, 147.6, 144.2, 130.5, 128.8, 128.3, 125.7, 122.0, 119.6, 115.3, 56.0, 28.4, 15.9; HRMS (ESI+TOF) calcd. for:  $\text{C}_{17}\text{H}_{18}\text{N}_3\text{O}$  280.1450  $[\text{M}+\text{H}]^+$ , found 280.1446.

### 4-(4-Butylphenyl)-1-(4-methoxyphenyl)-1*H*-1,2,3-triazole (3n)

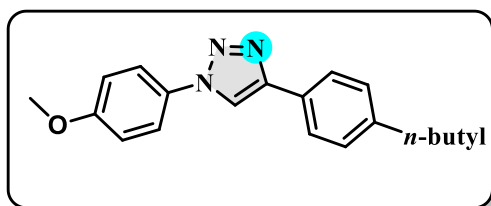

(4-Methoxyphenyl)hydrazine hydrogen chloride, 100 mg, 0.574 mmol); TLC (Hexane/EtOAc, 6:4);  $R_f = 0.4$ ; Yield 165 mg, 93%; white solid; m.p 157-163 °C;  $^1\text{H}$  NMR (400 MHz,  $\text{CDCl}_3$ )  $\delta$  8.89 (s, 1H), 7.60 (t,  $J = 8.2$  Hz, 4H), 7.06 (d,  $J = 8.3$  Hz, 2H), 6.92 (d,  $J = 9.1$  Hz, 2H), 3.59 (s, 3H), 2.39 – 2.34 (m, 2H), 1.37 – 1.30 (m, 2H), 1.08 (dd,  $J = 14.9, 7.4$  Hz, 2H), 0.66 (t,  $J = 7.3$  Hz, 3H);  $^{13}\text{C}$  NMR (101 MHz, DMSO)  $\delta$  159.7, 147.6, 142.8, 130.5, 129.3, 128.3, 125.7, 122.07, 119.6, 115.3, 56.0, 35.0, 33.5, 22.2, 14.2; HRMS (ESI+TOF) calcd. for:  $\text{C}_{19}\text{H}_{22}\text{N}_3\text{O}$  308.1765  $[\text{M}+\text{H}]^+$ , found 308.1763.

### 1,4-Bis(4-methoxyphenyl)-1*H*-1,2,3-triazole (3o)

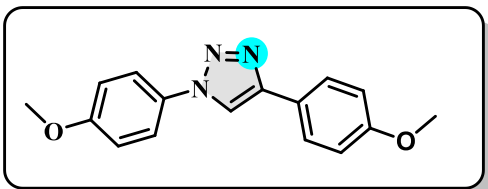

(4-Methoxyphenyl)hydrazine hydrogen chloride, 100 mg, 0.574 mmol); TLC (Hexane/EtOAc, 6:4);  $R_f = 0.4$ ; Yield 156 mg, 96%; brown solid; m.p 153-158 °C;  $^1\text{H}$  NMR (400 MHz, DMSO)  $\delta$  9.09 (s, 1H), 7.86 (dd,  $J = 8.9, 6.1$  Hz, 4H), 7.17 (d,  $J = 9.1$  Hz, 2H), 7.06 (d,  $J = 8.9$  Hz, 2H), 3.85 (s, 3H), 3.81 (s, 3H);  $^{13}\text{C}$  NMR (101 MHz, DMSO)  $\delta$  159.6, 147.5, 130.6, 127.1, 123.4, 122.0, 119.0, 115.3, 114.8, 56.0, 55.6; HRMS (ESI+TOF) calcd. for:  $\text{C}_{16}\text{H}_{16}\text{N}_3\text{O}_2$  282.1245  $[\text{M}+\text{H}]^+$ , found 282.1243.

### 4-(4-Fluorophenyl)-1-(4-methoxyphenyl)-1*H*-1,2,3-triazole (3p)

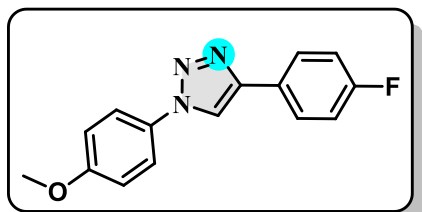

(4-Methoxyphenyl)phenylhydrazine hydrogen chloride, 100 mg, 0.574 mmol); TLC (Hexane/EtOAc, 6:4);  $R_f = 0.4$ ; Yield 120 mg, 77 %; white solid; m.p 142-147 °C.:  $^1\text{H}$  NMR (400 MHz, DMSO)  $\delta$  9.19 (s, 1H), 7.98 (dd,  $J = 8.9, 5.5$  Hz, 2H), 7.85 (d,  $J = 9.1$  Hz, 2H), 7.35 (t,  $J = 9.0$  Hz, 2H), 7.18 (d,  $J = 9.1$  Hz, 2H), 3.85 (s, 3H).  $^{19}\text{F}$  NMR (400 MHz, DMSO)  $\delta$  -113.69.  $^{13}\text{C}$  NMR (101 MHz, DMSO)  $\delta$  163.6, 161.2, 159.8, 146.7, 130.5, 127.8-127.7(d,  $J = 8$  Hz), 127.45-127.42 (d,  $J = 3$  Hz), 122.1, 120.0, 116.5, 116.3, 115.4, 56.0. HRMS (ESI+TOF) calcd. for:  $\text{C}_{15}\text{H}_{13}\text{N}_3\text{OF}$  270.1043  $[\text{M}+\text{H}]^+$ , found 270.1048.

### 4-(4-Bromophenyl)-1-(4-methoxyphenyl)-1*H*-1,2,3-triazole<sup>5</sup> (3q)

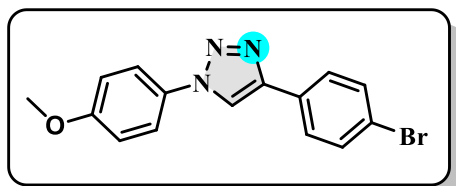

(4-Methoxyphenyl)hydrazine hydrogen chloride, 100 mg, 0.574 mmol); TLC (Hexane/EtOAc, 6:4);  $R_f = 0.4$ ; Yield 157 mg, 83 %; white solid; m.p 176-180 °C;  $^1\text{H}$  NMR (400 MHz, DMSO)  $\delta$  9.25 (s, 1H), 7.87 (dd,  $J = 17.8, 8.8$  Hz, 4H), 7.71 (d,  $J = 8.6$  Hz, 2H), 7.18 (d,  $J = 9.1$  Hz, 2H), 3.85 (s, 3H);  $^{13}\text{C}$  NMR (101 MHz, DMSO)  $\delta$  159.8, 146.5, 132.4, 130.4, 130.1, 127.7, 122.2, 121.6, 120.5, 115.4, 56.0; HRMS (ESI+TOF) calcd. for:  $\text{C}_{15}\text{H}_{13}\text{N}_3\text{OF}$  330.0224  $[\text{M}+\text{H}]^+$ , found 330.0242.

#### 4-(3-Fluorophenyl)-1-(4-methoxyphenyl)-1*H*-1,2,3-triazole (3r)

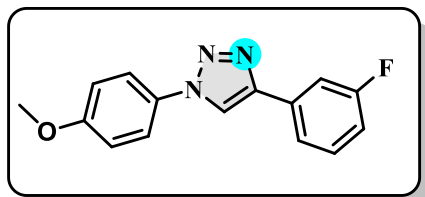

(4-Methoxyphenyl)hydrazine hydrogen chloride, 100 mg, 0.574 mmol); TLC (Hexane/EtOAc, 6:4);  $R_f = 0.4$ ; Yield 120 mg, 77 %; white solid; m.p 163-168 °C;  $^1\text{H}$  NMR (400 MHz, DMSO)  $\delta$  9.27 (s, 1H), 7.84 (d,  $J = 9.1$  Hz, 2H), 7.80 (d,  $J = 7.9$  Hz, 1H), 7.73 (ddd,  $J = 10.3, 2.5, 1.5$  Hz, 1H), 7.55 (td,  $J = 8.0, 6.2$  Hz, 1H), 7.26 – 7.15 (m, 3H), 3.84 (s, 3H);  $^{19}\text{F}$  NMR (377 MHz, DMSO)  $\delta$  -112.64;  $^{13}\text{C}$  NMR (101 MHz, DMSO)  $\delta$  164.2, 161.8, 159.8, 146.4, 146.4, 133.2, 133.1, 131.6, 131.5, 130.4, 122.1, 121.77, 121.75, 120.8, 115.4, 115.2, 112.4, 112.2, 56.0; HRMS (ESI+TOF) calcd. for:  $\text{C}_{15}\text{H}_{13}\text{N}_3\text{OF}$  270.1043  $[\text{M}+\text{H}]^+$ , found 270.1037.

#### 4-(3,5-Difluorophenyl)-1-(4-methoxyphenyl)-1*H*-1,2,3-triazole (3s)

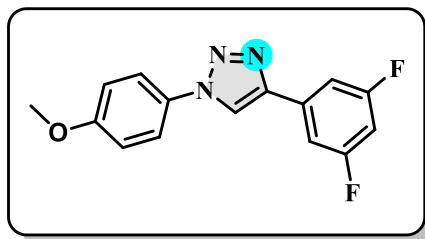

(4-Methoxyphenyl)hydrazine hydrogen chloride, 100 mg, 0.574 mmol); TLC (Hexane/EtOAc, 6:4);  $R_f = 0.4$ ; Yield 160 mg, 86 %; pale yellow solid; m.p 207-211 °C;  $^1\text{H}$  NMR (400 MHz, DMSO)  $\delta$  9.16 (s, 1H), 7.70 – 7.64 (m, 2H), 7.51 – 7.44 (m, 2H), 7.10 (tt,  $J = 9.3, 2.2$  Hz, 1H), 7.05 – 7.00 (m, 2H), 3.69 (s, 3H);  $^{19}\text{F}$  NMR (377 MHz, DMSO)  $\delta$  -109.03;  $^{13}\text{C}$  NMR (101 MHz, DMSO)  $\delta$  164.6, 164.5, 162.2, 162.1, 159.9, 145.6, 145.58, 145.55, 134.4, 134.3, 134.2, 130.2, 122.2, 121.4, 115.4, 108.8, 108.7, 108.6, 108.5, 103.8, 56.0; HRMS (ESI+TOF) calcd. for:  $\text{C}_{15}\text{H}_{12}\text{N}_3\text{OF}_2$  288.0948  $[\text{M}+\text{H}]^+$ , found 288.0951.

#### 1-(4-Fluorophenyl)-4-phenyl-1*H*-1,2,3-triazole<sup>4</sup> (3t)

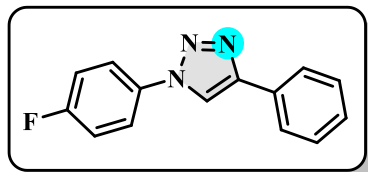

(4-fluorophenyl)hydrazine hydrogen chloride, 100 mg, 0.617 mmol); TLC (Hexane/EtOAc, 6:4);  $R_f = 0.3$ ; Yield 135 mg, 91 %; white solid; m.p 210-215 °C;  $^1\text{H}$  NMR (400 MHz, DMSO)  $\delta$  9.29 (s, 1H), 8.05 – 7.98 (m, 2H), 7.97 – 7.91 (m, 2H), 7.54 – 7.48 (m, 4H), 7.40 (m, 1H);  $^{19}\text{F}$  NMR (377 MHz, DMSO)  $\delta$  -113.06;  $^{13}\text{C}$  NMR (101 MHz, DMSO)  $\delta$  163.3, 160.9, 147.8, 133.7, 133.6, 130.6, 129.5, 128.7, 125.8, 122.8, 122.8, 120.3, 117.4, 117.1; HRMS (ESI+TOF) calcd. for:  $\text{C}_{14}\text{H}_{11}\text{N}_3\text{F}$  240.0937  $[\text{M}+\text{H}]^+$ , found 240.0919.

### 1-(4-Fluorophenyl)-4-(4-methoxyphenyl)-1*H*-1,2,3-triazole (3u)

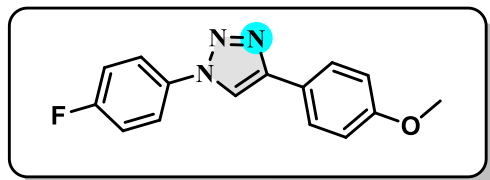

(4-fluorophenyl)hydrazine hydrogen chloride, 100 mg, 0.617 mmol); TLC (Hexane/EtOAc, 6:4);  $R_f = 0.3$ ; Yield 123 mg, 74%; white solid; m.p 187-194 °C;  $^1\text{H}$  NMR (400 MHz, DMSO)  $\delta$  9.17 (s, 1H), 8.10 – 7.94 (m, 2H), 7.94 – 7.80 (m, 2H), 7.49 (t,  $J = 8.8$  Hz, 2H), 7.20 – 6.97 (m, 2H), 3.81 (s, 3H);  $^{19}\text{F}$  NMR (400 MHz, DMSO)  $\delta$  -113.2;  $^{13}\text{C}$  NMR (101 MHz, DMSO)  $\delta$  163.2, 160.8, 159.7, 147.7, 133.7, 133.7, 127.1, 123.1, 122.7, 122.6, 119.3, 117.3, 117.1, 114.8, 55.6; HRMS (ESI+TOF) calcd. for:  $\text{C}_{15}\text{H}_{13}\text{N}_3\text{OF}$  270.1043  $[\text{M}+\text{H}]^+$ , found 270.1048.

### 4-(4-Phenyl-1*H*-1,2,3-triazol-1-yl)benzotrile (3v)

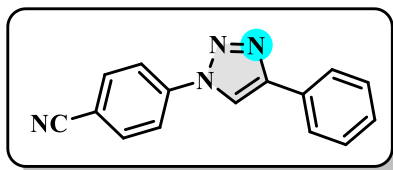

(4-Cyanophenyl)hydrazine hydrogen chloride, 100 mg, 0.591 mmol); TLC (Hexane/EtOAc, 6:4);  $R_f = 0.4$ ; Yield 140 mg, 96%; pale yellow solid; m.p 203-210 °C;  $^1\text{H}$  NMR (400 MHz, DMSO)  $\delta$  9.47 (s, 1H), 8.17 (dd,  $J = 22.1, 9.0$  Hz, 4H), 7.98 – 7.93 (m, 2H), 7.52 (t,  $J = 7.6$  Hz, 2H), 7.41 (t,  $J = 7.4$  Hz, 1H);  $^{13}\text{C}$  NMR (101 MHz, DMSO)  $\delta$  148.1, 139.9, 134.8, 130.3, 129.5, 128.9, 125.8, 120.8, 120.2, 118.6, 111.5; HRMS (ESI+TOF) calcd. for:  $\text{C}_{15}\text{H}_{11}\text{N}_4$  247.0984  $[\text{M}+\text{H}]^+$ , found 247.0981.

### 4-(4-(4-Methoxyphenyl)-1*H*-1,2,3-triazol-1-yl)benzotrile (3w)

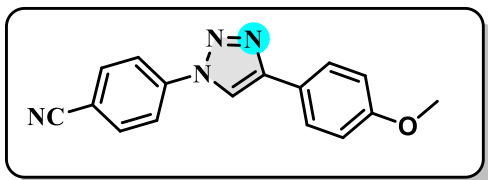

(4-Cyanophenyl)hydrazine hydrogen chloride, 100 mg, 0.591 mmol); TLC (Hexane/EtOAc, 6:4);  $R_f = 0.4$ ; Yield 139 mg, 95%; white solid; m.p 198-204 °C;  $^1\text{H}$  NMR (400 MHz, DMSO)  $\delta$  9.31 (s, 1H), 8.13 (dd,  $J = 21.3, 9.0$  Hz, 4H), 7.85 (d,  $J = 8.8$  Hz, 2H), 7.15 – 7.00 (m, 2H), 3.80 (s, 3H);  $^{13}\text{C}$  NMR (101 MHz, DMSO)  $\delta$  159.90, 148.12, 139.99, 134.74, 127.24, 122.78, 120.60, 119.07, 118.62, 114.90, 111.31, 55.64, 40.15, 39.94, 39.73; HRMS (ESI+TOF) calcd. for:  $\text{C}_{16}\text{H}_{13}\text{N}_4\text{O}$  277.1089  $[\text{M}+\text{H}]^+$ , found 277.1085.

#### 4-Butyl-1-phenyl-1*H*-1,2,3-triazole (3x)

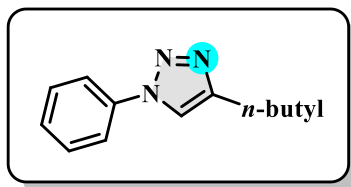

(Phenylhydrazine hydrogen chloride, 100 mg, 0.694 mmol); TLC (Hexane/EtOAc, 6:4);  $R_f = 0.6$ ; Yield 125 mg, 89 %; pale yellow solid;  $^1\text{H}$  NMR (400 MHz, DMSO)  $\delta$  8.57 (s, 1H), 7.96 – 7.83 (m, 2H), 7.68 – 7.55 (m, 2H), 7.46 (m, 1H), 2.70 (t,  $J = 7.6$  Hz, 2H), 1.74 – 1.60 (m, 2H), 1.37 (m, 2H), 0.92 (t,  $J = 7.4$  Hz, 3H);  $^{13}\text{C}$  NMR (101 MHz, DMSO)  $\delta$  148.6, 137.2, 130.3, 128.7, 120.4, 120.2, 31.40, 25.1, 22.1, 14.1; HRMS (ESI+TOF) calcd. for:  $\text{C}_8\text{H}_7\text{N}_3$  202.1343  $[\text{M}+\text{H}]^+$ , found 202.1343.

#### 4-Butyl-1-(4-methoxyphenyl)-1*H*-1,2,3-triazole (3y)

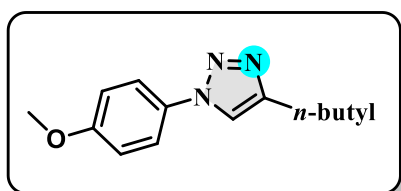

(4-Methoxyphenyl)hydrazine hydrogen chloride 100 mg, 0.574 mmol); TLC (Hexane/EtOAc, 6:4);  $R_f = 0.4$ ; Yield 107 mg, 80 %; yellow solid;  $^1\text{H}$  NMR (400 MHz, DMSO)  $\delta$  8.46 (d,  $J = 1.0$  Hz, 1H), 7.78 (d,  $J = 9.0$  Hz, 2H), 7.20 – 7.02 (m, 2H), 3.82 (s, 3H), 2.69 (t,  $J = 7.6$  Hz, 2H), 1.64 (ddd,  $J = 12.8, 8.6, 6.5$  Hz, 2H), 1.47 – 1.32 (m, 2H), 0.92 (t,  $J = 7.3$  Hz, 3H);  $^{13}\text{C}$  NMR (101 MHz, DMSO)  $\delta$  159.4, 148.3, 130.7, 121.8, 120.4, 115.2, 55.9, 31.4, 25.1, 22.1, 14.1; HRMS (ESI+TOF) calcd. for:  $\text{C}_{13}\text{H}_{18}\text{N}_3\text{O}$  232.1450  $[\text{M}+\text{H}]^+$ , found 232.1452.

#### 4-Butyl-1-(4-fluorophenyl)-1*H*-1,2,3-triazole (3z)

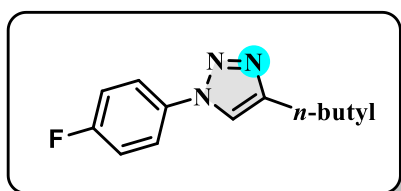

(4-Fluorophenyl)hydrazine hydrogen chloride, 100 mg, 0.617 mmol); TLC (Hexane/EtOAc, 6:4)  $R_f = 0.6$ ; Yield 112 mg, 83 %; white solid; m.p 154-160 °C;  $^1\text{H}$  NMR (400 MHz, DMSO)  $\delta$  8.56 (s, 1H), 8.01 – 7.85 (m, 2H), 7.52 – 7.37 (m, 2H), 2.70 (t,  $J = 7.6$  Hz, 2H), 1.72 – 1.57 (m, 2H), 1.37 (m, 2H), 0.92 (t,  $J = 7.4$  Hz, 3H);  $^{19}\text{F}$  NMR (400 MHz, DMSO)  $\delta$  -113.7;  $^{13}\text{C}$  NMR (101 MHz, DMSO)  $\delta$  163.0, 160.6, 148.6, 133.8, 122.5, 122.4, 120.7, 117.2, 117.0, 31.3, 25.1, 22.1, 14.1; HRMS (ESI+TOF) calcd. for:  $\text{C}_{12}\text{H}_{15}\text{N}_3\text{F}$  220.1250  $[\text{M}+\text{H}]^+$ , found 220.1255.

#### 4-(4-Butyl-1*H*-1,2,3-triazol-1-yl)benzonitrile (3aa)

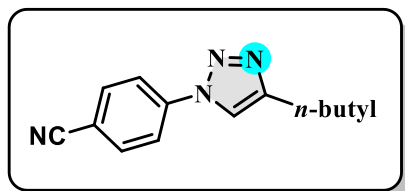

(4-Cyanophenyl)hydrazine hydrogen chloride, 100 mg, 0.591 mmol); TLC (Hexane/EtOAc, 6:4)  $R_f = 0.4$ ; Yield 110 mg, 82 %; pale yellow liquid;  $^1\text{H}$  NMR (400 MHz, DMSO)  $\delta$  8.75 (s, 1H), 8.18 – 8.04 (m, 4H), 2.81 – 2.64 (m, 2H), 1.74 – 1.58 (m, 2H), 1.37 (m, 2H), 0.92 (t,  $J = 7.3$  Hz, 3H);  $^{13}\text{C}$  NMR (101 MHz, DMSO)  $\delta$  149.1, 140.1, 134.7, 120.7, 120.5, 118.6, 111.0, 31.2, 25.0, 22.1, 14.1. HRMS (ESI+TOF) calcd. for:  $\text{C}_{13}\text{H}_{15}\text{N}_4$  227.1277  $[\text{M}+\text{H}]^+$ , found 227.1276.

#### 1-(1-Phenyl-1*H*-1,2,3-triazol-4-yl)cyclopentan-1-ol (3ab)

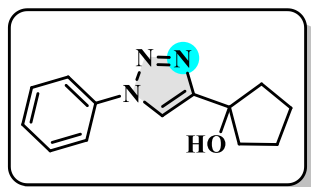

Phenylhydrazine hydrogen chloride, 100 mg, 0.694 mmol); TLC (Hexane/EtOAc, 6:4);  $R_f = 0.4$ ; Yield 136 mg, 85 %; pale yellow solid; m.p 154-159 °C ;  $^1\text{H}$  NMR (400 MHz, DMSO)  $\delta$  8.60 (s, 1H), 7.93 – 7.90 (m, 2H), 7.59 (dd,  $J = 8.5, 7.2$  Hz, 2H), 7.49 – 7.45 (m, 1H), 5.15 (s, 1H), 2.09 – 2.00 (m, 2H), 1.95 – 1.83 (m, 4H), 1.73 (dd,  $J = 5.7, 2.2$  Hz, 2H);  $^{13}\text{C}$  NMR (101 MHz, DMSO)  $\delta$  156.1, 137.3, 130.3, 128.8, 120.3, 119.8, 77.8, 41.1, 23.7; HRMS (ESI+TOF) calcd. for:  $\text{C}_{13}\text{H}_{16}\text{N}_3\text{O}$  230.1293  $[\text{M}+\text{H}]^+$ , found 230.1298.

#### 1-(1-(4-Methoxyphenyl)-1*H*-1,2,3-triazol-4-yl)cyclopentan-1-ol (3ac)

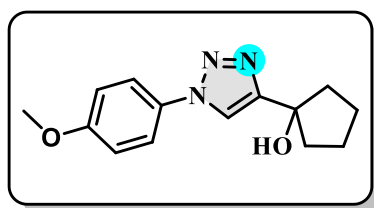

(4-Methoxyphenyl)hydrazine hydrogen chloride, 100 mg, 0.574 mmol); TLC (Hexane/EtOAc, 6:4);  $R_f = 0.4$ ; Yield 129 mg, 86 %; pale yellow solid; m.p 171-176 °C;  $^1\text{H}$  NMR (400 MHz, DMSO)  $\delta$  8.48 (s, 1H), 7.81 (d,  $J = 9.1$  Hz, 2H), 7.12 (d,  $J = 9.1$  Hz, 2H), 5.12 (s, 1H), 3.83 (s, 3H), 2.03 (d,  $J = 6.6$  Hz, 2H), 2.00 – 1.81 (m, 4H), 1.78 – 1.68 (m, 2H);  $^{13}\text{C}$  NMR (101 MHz, DMSO)  $\delta$  159.4, 155.8, 130.7, 121.9, 119.8, 115.2, 77.8, 55.9, 41.1, 23.7; HRMS (ESI+TOF) calcd. for:  $\text{C}_{14}\text{H}_{18}\text{N}_3\text{O}_2$  260.1399  $[\text{M}+\text{H}]^+$ , found 260.1401.

## General Procedure for one pot conversion of aryl hydrazine hydrochloride to 1,2,3-triazoles (4a-4f, Scheme 2).

To an oven-dried 100 ml round bottom flask charged with a magnetic stir bar was added aryl hydrazine hydrochloride **1** (100 mg, 0.574-0.694 mmol, 1 equiv.) followed by *tert.* Butyl nitrite (1 equiv.) in PEG-400:H<sub>2</sub>O (5 mL, 2:1) was stirred at 0 °C for 30 minutes. The progress of the reaction was observed using TLC to monitor the conversion of aryl hydrazine hydrochloride to phenyl azide (*in situ*) **2**. Then alkyne (1.0 equiv.) followed by CuSO<sub>4</sub> · 5H<sub>2</sub>O (0.1 equiv.) and Sod. Ascorbate (0.05 equiv.) were added to the reaction mixture. The reaction mixture was warmed to room temperature and the stirring was continued for 8-12 h overnight after the reaction was complete as monitored by TLC. The reaction mixture was diluted with H<sub>2</sub>O, and the precipitate formed was filtered and dried in vacuo to afford the corresponding triazoles (**4a-4f**).

### 2-(4-(*p*-tolyl)-1*H*-1,2,3-triazol-1-yl)benzo[*d*]thiazole (4a)

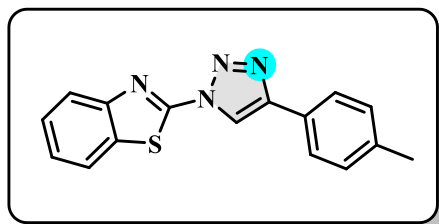

(2-Hydrazineylbenzo[*d*]thiazole, 100 mg, 0.574 mmol); TLC (Hexane/EtOAc, 6:4);  $R_f = 0.4$ ; Yield 126 mg, 71%; white solid; m.p 193-197 °C; <sup>1</sup>H NMR (400 MHz, CDCl<sub>3</sub>) δ 8.73 (s, 1H), 8.00 (ddd,  $J = 8.2, 1.1, 0.6$  Hz, 1H), 7.91 (ddd,  $J = 8.0, 1.2, 0.6$  Hz, 1H), 7.83 (d,  $J = 8.1$  Hz, 2H), 7.58 – 7.53 (m, 1H), 7.47 (ddd,  $J = 8.1, 7.3, 1.2$  Hz, 1H), 7.30 (d,  $J = 7.9$  Hz, 2H), 2.41 (s, 3H). <sup>13</sup>C NMR (101 MHz, CDCl<sub>3</sub>) δ 156.4, 150.1, 148.9, 139.0, 133.1, 129.7, 127.0, 126.48, 126.1, 126.0, 123.1, 121.9, 116.7, 21.4; HRMS (ESI+TOF) calcd. for: C<sub>16</sub>H<sub>14</sub>N<sub>3</sub>S<sub>2</sub> 293.0847 [M+H]<sup>+</sup>, found 293.0847.

### 2-(4-butyl-1*H*-1,2,3-triazol-1-yl)benzo[*d*]thiazole (4b)

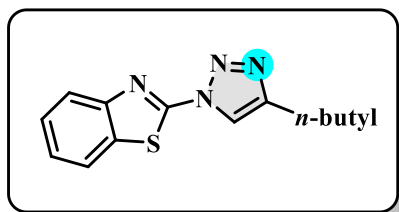

(2-Hydrazineylbenzo[*d*]thiazole, 100 mg, 0.574 mmol); TLC (Hexane/EtOAc, 6:4);  $R_f = 0.4$ ; Yield 121 mg, 77%; pale yellow solid; m.p 198-205 °C; <sup>1</sup>H NMR (400 MHz, CDCl<sub>3</sub>) δ 8.30 (s, 1H), 7.98 – 7.96 (m, 1H), 7.91 – 7.89 (m, 1H), 7.56 – 7.52 (m, 1H), 7.48 – 7.43 (m, 1H), 2.84 (t,  $J = 7.5$  Hz, 2H), 1.78 – 1.71 (m, 2H), 1.45 (dd,  $J = 15.0, 7.4$  Hz,

2H), 0.97 (t,  $J = 7.4$  Hz, 3H);  $^{13}\text{C}$  NMR (101 MHz,  $\text{CDCl}_3$ )  $\delta$  150.1, 149.8, 133.0, 126.9, 125.9, 123.0, 121.8, 118.6, 31.1, 30.9, 25.2, 22.2, 13.8; HRMS (ESI+TOF) calcd. for:  $\text{C}_{13}\text{H}_{16}\text{N}_3\text{S}_2$  259.1018  $[\text{M}+\text{H}]^+$ , found 259.1018.

#### 2-(4-(4-fluorophenyl)-1H-1,2,3-triazol-1-yl)benzo[d]thiazole (4c)

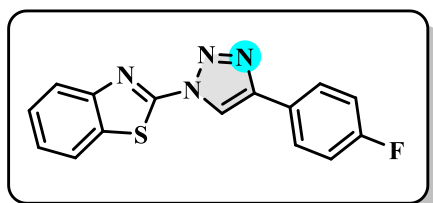

(2-Hydrazineylbenzo[d]thiazole, 100 mg, 0.574 mmol); TLC (Hexane/EtOAc, 6:4);  $R_f = 0.4$ ; Yield 119 mg, 68%; light brown solid; m.p 192-197 °C;  $^1\text{H}$  NMR (400 MHz,  $\text{CDCl}_3$ )  $\delta$  8.67 (s, 1H), 7.93 (ddd,  $J = 8.1, 1.2, 0.6$  Hz, 1H), 7.90 – 7.80 (m, 3H), 7.49 (ddd,  $J = 8.2, 7.3, 1.3$  Hz, 1H), 7.40 (ddd,  $J = 8.4, 7.4, 1.2$  Hz, 1H), 7.11 (t,  $J = 8.7$  Hz, 2H);  $^{19}\text{F}$  NMR (377 MHz,  $\text{CDCl}_3$ )  $\delta$  -111.99;  $^{13}\text{C}$  NMR (101 MHz,  $\text{CDCl}_3$ )  $\delta$  164.41, 161.93, 156.28, 150.10, 147.95, 133.17, 127.98, 127.90, 127.16, 126.23, 125.58, 125.55, 123.26, 121.94, 116.91, 116.26, 116.05, 77.35, 77.04, 76.72; HRMS (ESI+TOF) calcd. for:  $\text{C}_{15}\text{H}_{11}\text{N}_3\text{S}_2\text{F}$  297.0617  $[\text{M}+\text{H}]^+$ , found 297.0617.

#### 2-(1-Phenyl-1H-1,2,3-triazol-4-yl)pyridine (4d)

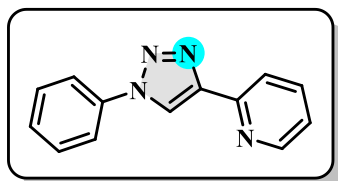

(Phenylhydrazine hydrogen chloride, 100 mg, 0.694 mmol); TLC (Hexane/EtOAc, 6:4);  $R_f = 0.4$ ; Yield 103 mg, 66 %; brown solid; m.p 179-184 °C;  $^1\text{H}$  NMR (400 MHz,  $\text{CDCl}_3$ )  $\delta$  8.65 (s, 1H), 8.62 (d,  $J = 4.3$  Hz, 1H), 8.27 (d,  $J = 7.9$  Hz, 1H), 7.82 (dd,  $J = 8.6, 1.2$  Hz, 3H), 7.58 – 7.53 (m, 2H), 7.48 – 7.44 (m, 1H), 7.31 – 7.27 (m, 1H);  $^{13}\text{C}$  NMR (101 MHz,  $\text{CDCl}_3$ )  $\delta$  149.8, 149.3, 148.7, 137.2, 136.9, 129.8, 128.9, 123.1, 120.5, 120.4, 120.1; HRMS (ESI+TOF) calcd. for:  $\text{C}_{13}\text{H}_{11}\text{N}_4$  223.0984  $[\text{M}+\text{H}]^+$ , found 223.0989.

#### 1-Phenyl-4-(thiophen-2-yl)-1H-1,2,3-triazole<sup>6</sup> (4e)

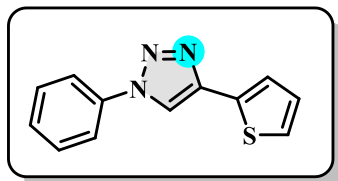

(Phenylhydrazine hydrogen chloride, 100 mg, 0.694 mmol); TLC (Hexane/EtOAc, 6:4);  $R_f = 0.4$ ; Yield 121 mg, 77%; pale yellow solid; m.p 132-138 °C;  $^1\text{H}$  NMR (400 MHz,  $\text{CDCl}_3$ )  $\delta$  8.03 (s, 1H), 7.72 – 7.68 (m, 2H), 7.49 – 7.44 (m, 2H), 7.41 – 7.36 (m, 2H), 7.27 (dd,  $J = 5.1, 1.1$  Hz, 1H), 7.04 (dd,  $J = 5.1, 3.6$  Hz, 1H);  $^{13}\text{C}$  NMR (101 MHz,  $\text{CDCl}_3$ )  $\delta$  143.4,

136.8, 132.3, 129.8, 128.9, 127.7, 125.4, 124.6, 120.5, 117.1; HRMS (ESI+TOF) calcd. for: C<sub>12</sub>H<sub>10</sub>N<sub>3</sub>S 228.0595 [M+H]<sup>+</sup>, found 228.0601.

#### 1-(4-Fluorophenyl)-4-(thiophen-2-yl)-1H-1,2,3-triazole (4f)

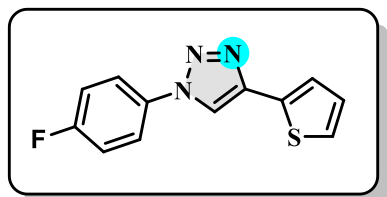

(4-Fluorophenyl)hydrazine hydrogen chloride 100 mg, 0.617 mmol); TLC (Hexane/EtOAc, 6:4); R<sub>f</sub> = 0.4; Yield 124 mg 82%; pale yellow solid; m.p 137-142 °C; <sup>1</sup>H NMR (400 MHz, CDCl<sub>3</sub>) δ 7.99 (s, 1H), 7.68 (dd, *J* = 9.0, 4.6 Hz, 2H), 7.40 (dd, *J* = 3.6, 1.0 Hz, 1H), 7.27 (dd, *J* = 5.1, 1.1 Hz, 1H), 7.16 (dd, *J* = 8.9, 8.1 Hz, 2H), 7.04 (dd, *J* = 5.1, 3.6 Hz, 1H). <sup>19</sup>F NMR (377 MHz, CDCl<sub>3</sub>) δ -111.85. <sup>13</sup>C NMR (101 MHz, CDCl<sub>3</sub>) δ 163.7, 161.2, 143.6, 133.1, 132.2, 127.7, 125.5, 124.6, 122.5, 122.5, 117.2, 116.9, 116.6; HRMS (ESI+TOF) calcd. for: C<sub>12</sub>H<sub>9</sub>N<sub>3</sub>SF 246.0501 [M+H]<sup>+</sup>, found 246.0508.

#### General Procedure for one pot conversion of aryl hydrazine hydrochloride to 1,2,3-triazoles (5a-5c), (Scheme 3).

To an oven-dried 100 ml round bottom flask charged with a magnetic stir bar was added aryl hydrazine hydrochloride **1** (100 mg, 0.574-0.694 mmol, 1 equiv.) followed by *tert.* Butyl nitrite (1 equiv.) in PEG-400:H<sub>2</sub>O (5 mL, 2:1) was stirred at 0 °C for 30 minutes. The progress of the reaction was observed using TLC to monitor the conversion of aryl hydrazine hydrochloride to phenyl azide (*in situ*) **2**. Then alkyne (1.0 equiv.) followed by CuSO<sub>4</sub> · 5H<sub>2</sub>O (0.1 equiv.) and Sod. Ascorbate (0.05 equiv.) were added to the reaction mixture. The reaction mixture was warmed to room temperature and the stirring was continued for 8-12 h overnight after the reaction was complete as monitored by TLC. The reaction mixture was diluted with H<sub>2</sub>O, and the precipitate formed was filtered and dried *in vacuo* to afford the corresponding triazoles (**5a-5c**).

#### *N*-((1-phenyl-1H-1,2,3-triazol-4-yl)methyl)aniline<sup>7</sup> (5a)

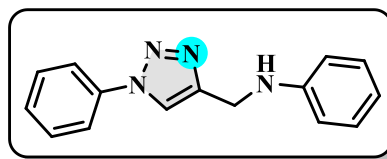

(Phenylhydrazine hydrogen chloride, 100 mg, 0.694 mmol); TLC (Hexane/EtOAc, 6:4); R<sub>f</sub> = 0.4; Yield 145 mg, 83 %; yellow solid; m.p 137-143 °C; <sup>1</sup>H NMR (400 MHz, CDCl<sub>3</sub>) δ 8.02 (s, 1H), 7.90 – 7.82 (m, 2H), 7.76 – 7.69 (m, 2H), 7.53 (dt, *J* = 8.3, 7.2 Hz, 4H), 7.49 – 7.38 (m,

2H);  $^{13}\text{C}$  NMR (101 MHz,  $\text{CDCl}_3$ )  $\delta$  141.6, 136.8, 129.8, 129.7, 129.6, 128.9, 127.6, 123.7, 120.5, 119.7, 77.3, 77.0, 76.7, 40.7; HRMS (ESI+TOF) calcd. for:  $\text{C}_{15}\text{H}_{15}\text{N}_4$  251.1240  $[\text{M}+\text{H}]^+$ , found 251.1240.

#### 4-((4-(Tert-butyl)phenoxy)methyl)-1-phenyl-1H-1,2,3-triazole (5b)

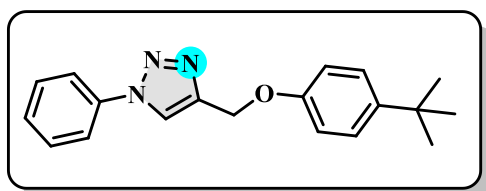

(Phenylhydrazine hydrogen chloride, 100 mg, 0.694 mmol); TLC (Hexane/EtOAc, 6:4);  $R_f$  = 0.4; Yield 160 mg, 75%; brown solid; m.p 178-184 °C;  $^1\text{H}$  NMR (400 MHz,  $\text{CDCl}_3$ )  $\delta$  8.08 (s, 1H), 7.75 (dd,  $J$  = 8.4, 1.1 Hz, 2H), 7.57 – 7.52 (m, 2H), 7.46 (ddd,  $J$  = 7.4, 3.8, 1.2 Hz, 1H), 7.34 (d,  $J$  = 8.9 Hz, 2H), 6.98 (d,  $J$  = 8.9 Hz, 2H), 5.31 (s, 2H), 1.32 (s, 9H).  $^{13}\text{C}$  NMR (101 MHz,  $\text{CDCl}_3$ )  $\delta$  155.9, 144.1, 136.99, 129.8, 128.9, 126.4, 120.6, 114.2, 62.0, 34.1, 31.5. HRMS (ESI+TOF) calcd. for:  $\text{C}_{19}\text{H}_{22}\text{N}_3\text{O}$  308.1763  $[\text{M}+\text{H}]^+$ , found 308.1769.

#### 1-Phenyl-4-((phenylthio)methyl)-1H-1,2,3-triazole<sup>8</sup> (5c)

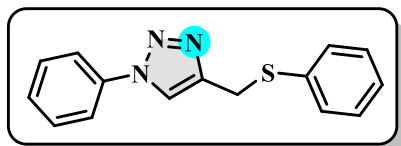

(Phenylhydrazine hydrogen chloride, 100 mg, 0.694 mmol); TLC (Hexane/EtOAc, 6:4);  $R_f$  = 0.4; Yield 146 mg, 78%; yellow solid; m.p 165-170 °C;  $^1\text{H}$  NMR (400 MHz,  $\text{CDCl}_3$ )  $\delta$  7.61 (s, 1H), 7.53 – 7.48 (m, 2H), 7.37 – 7.32 (m, 2H), 7.28 – 7.21 (m, 3H), 7.15 – 7.11 (m, 2H), 7.05 (ddd,  $J$  = 7.3, 3.9, 1.3 Hz, 1H), 4.16 (d,  $J$  = 0.6 Hz, 2H);  $^{13}\text{C}$  NMR (101 MHz, DMSO)  $\delta$  136.0, 134.3, 129.2, 128.7, 127.9, 125.7, 119.2, 27.2; HRMS (ESI+TOF) calcd. for:  $\text{C}_{15}\text{H}_{14}\text{N}_3\text{S}$  268.0908  $[\text{M}+\text{H}]^+$ , found 268.0918.

## General procedure for late-stage functionalization of natural products (6a-6e), (Scheme 4).

To an oven-dried 100 ml round bottom flask charged with a magnetic stir bar was added aryl hydrazine hydrochloride **1** (100 mg, 0.574-0.694 mmol, 1 equiv.) followed by *tert.* Butyl nitrite (1 equiv.) in PEG-400:H<sub>2</sub>O (5 mL, 2:1) was stirred at 0 °C for 30 minutes. The progress of the reaction was observed using TLC to monitor the conversion of aryl hydrazine hydrochloride to phenyl azide (*in situ*) **2**. Then alkyne (1.0 equiv.) followed by CuSO<sub>4</sub> · 5H<sub>2</sub>O (0.1 equiv.) and Sod. Ascorbate (0.05 equiv.) were added to the reaction mixture. The reaction mixture was warmed to room temperature and the stirring was continued for 8-12 h overnight after the reaction was complete as monitored by TLC. The reaction mixture was diluted with H<sub>2</sub>O, and the precipitate formed was filtered and dried *in vacuo* to afford the corresponding triazoles (**6a-6e**).

### 4-((1-Phenyl-1*H*-1,2,3-triazol-4-yl)methoxy)-2*H*-chromen-2-one<sup>9</sup> (6a)

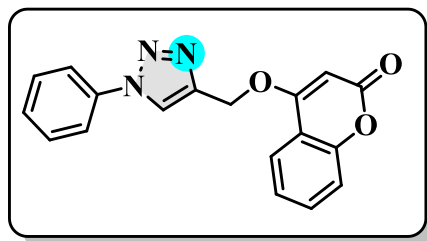

(Phenylhydrazine hydrogen chloride, 100 mg, 0.694 mmol); TLC (Hexane/EtOAc, 6:4);  $R_f = 0.4$ ; Yield 154 mg, 69%; pale yellow solid; m.p 164-170 °C; <sup>1</sup>H NMR (400 MHz, CDCl<sub>3</sub>)  $\delta$  8.21 (s, 1H), 7.85 – 7.77 (m, 3H), 7.60 – 7.48 (m, 4H), 7.33 (dd,  $J = 8.4, 0.7$  Hz, 1H), 7.26 (dd,  $J = 8.0, 0.9$  Hz, 1H), 5.93 (s, 1H), 5.44 (s, 2H); <sup>13</sup>C NMR (101 MHz, CDCl<sub>3</sub>)  $\delta$  164.9, 162.6, 153.3, 142.1, 136.7, 132.6, 129.9, 129.2, 123.9, 123.1, 121.7, 120.7, 116.7, 115.4, 91.2, 62.6, 30.9; HRMS (ESI+TOF) calcd. for: C<sub>18</sub>H<sub>14</sub>N<sub>3</sub>O<sub>3</sub> 320.1035 [M+H]<sup>+</sup>, found 320.1038.

### 4-((4-Allyl-2-methoxyphenoxy)methyl)-1-phenyl-1*H*-1,2,3-triazole (6b)

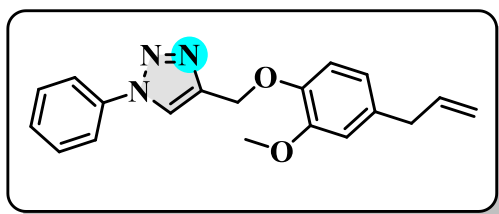

(Phenylhydrazine hydrogen chloride, 100 mg, 0.694 mmol); TLC (Hexane/EtOAc, 6:4);  $R_f = 0.4$ ; Yield 188 mg, 80%; yellow solid; <sup>1</sup>H NMR (400 MHz, CDCl<sub>3</sub>)  $\delta$  8.01 (s, 1H), 7.68 – 7.62 (m, 2H), 7.50 – 7.34 (m, 3H), 6.93 (d,  $J = 8.0$  Hz, 1H), 6.65 (dt,  $J = 8.0, 1.9$  Hz, 2H), 5.88 (ddt,  $J = 16.8, 10.1, 6.7$  Hz, 1H), 5.34 – 5.23 (m, 2H), 5.17 – 4.85 (m, 2H), 3.80 (s, 3H), 3.26 (d,  $J = 6.7$  Hz, 2H); <sup>13</sup>C NMR (101 MHz, CDCl<sub>3</sub>)  $\delta$  149.4, 145.8, 145.2, 137.5, 137.0, 133.9, 129.8, 129.7, 128.8, 121.1, 120.6, 120.6, 120.5,

115.7, 114.3, 112.2, 63.3, 55.8, 39.8; HRMS (ESI+TOF) calcd. for: C<sub>19</sub>H<sub>20</sub>N<sub>3</sub>O<sub>2</sub> 322.1556 [M+H]<sup>+</sup>, found 322.1557.

#### 4-((2-Isopropyl-5-methylphenoxy)methyl)-1-phenyl-1*H*-1,2,3-triazole<sup>10</sup> (6c)

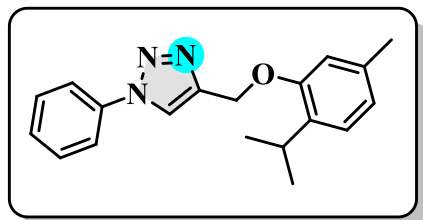

(Phenylhydrazine hydrogen chloride, 100 mg, 0.694 mmol); TLC (Hexane/EtOAc, 6:4); R<sub>f</sub> = 0.5; Yield 171 mg, 80%; white solid; m.p 124-130 °C; <sup>1</sup>H NMR (400 MHz, CDCl<sub>3</sub>) δ 8.02 (s, 1H), 7.76 – 7.72 (m, 2H), 7.52 (m, 2H), 7.46 – 7.41 (m, 1H), 7.12 (d, *J* = 7.7 Hz, 1H), 6.83 (s, 1H), 6.79 (d, *J* = 7.7 Hz, 1H), 5.30 (s, 2H), 3.32 (dt, *J* = 13.8, 6.9 Hz, 1H), 2.33 (s, 3H), 1.22 (s, 3H), 1.20 (s, 3H); <sup>13</sup>C NMR (101 MHz, CDCl<sub>3</sub>) δ 155.2, 145.6, 137.0, 136.5, 134.2, 129.8, 128.8, 126.1, 121.9, 120.6, 120.5, 112.8, 62.4, 26.63, 22.8, 21.4; HRMS (ESI+TOF) calcd. for: C<sub>19</sub>H<sub>22</sub>N<sub>3</sub>O 308.1763 [M+H]<sup>+</sup>, found 308.1771.

#### 9-Methoxy-6-methylene-2-(((1-phenyl-1*H*-1,2,3-triazol-4-yl)methoxy)methyl)-2,3,4,4a,6,10b-hexahydropyrano[3,2-*c*]isochromene-3,4,8,10-tetrayl tetraacetate (6d)

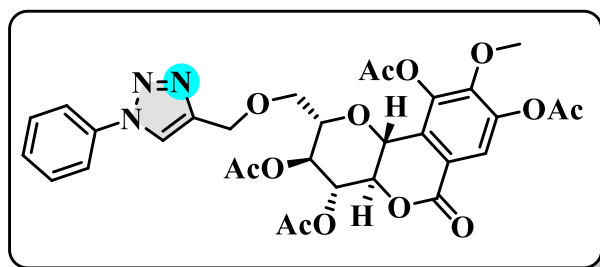

(Phenylhydrazine hydrogen chloride, 100 mg, 0.694 mmol); TLC (Hexane/EtOAc, 6:4); R<sub>f</sub> = 0.4; Yield 350 mg, 77%; white solid; m.p 238-242 °C; <sup>1</sup>H NMR (400 MHz, CDCl<sub>3</sub>) δ 8.14 (s, 1H), 7.67 (d, *J* = 7.4 Hz, 3H), 7.42 (dt, *J* = 31.0, 7.3 Hz, 3H), 5.40 (t, *J* = 9.5 Hz, 1H), 5.28 (s, 2H), 5.07 – 4.99 (m, 1H), 4.74 (d, *J* = 10.5 Hz, 1H), 4.30 – 4.19 (m, 2H), 4.71 – 3.83 (m, 6H), 4.07 (dd, *J* = 12.6, 3.9 Hz, 1H), 3.85 (s, 3H), 3.77 (dd, *J* = 10.0, 1.4 Hz, 1H), 2.24 (s, 3H), 2.02 (d, *J* = 3.9 Hz, 6H), 1.99 (s, 3H); <sup>13</sup>C NMR (101 MHz, DMSO) δ 165.7, 165.3, 164.9, 163.4, 157.6, 147.2, 142.7, 136.4, 125.1, 124.2, 120.1, 115.9, 113.6, 108.9, 71.8, 67.8, 67.3, 63.5, 57.9, 57.2, 56.6, 16.04, 16.01, 15.8, 15.7; HRMS (ESI+TOF) calcd. for: C<sub>31</sub>H<sub>32</sub>N<sub>3</sub>O<sub>13</sub> 654.1935 [M+H]<sup>+</sup>, found 654.1947.

**(Z)-4-(((3,7-dimethylocta-2,6-dien-1-yl)oxy)methyl)-1-phenyl-1H-1,2,3-triazole (6e)**

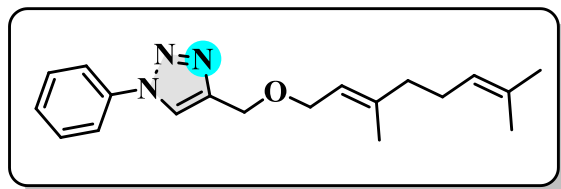

(Phenylhydrazine hydrogen chloride, 100 mg, 0.694 mmol); TLC (Hexane/EtOAc, 6:4);  $R_f = 0.4$ ; Yield 121 mg, 56%; pale yellow solid;  $^1\text{H}$  NMR (400 MHz,  $\text{CDCl}_3$ )  $\delta$  7.93 (s, 4H), 7.68 – 7.65 (m,

8H), 7.48 – 7.44 (m, 8H), 7.38 (dt,  $J = 4.1, 1.6$  Hz, 4H), 5.38 – 5.28 (m, 5H), 5.06 – 4.98 (m, 5H), 4.65 (s, 9H), 4.08 (d,  $J = 6.8$  Hz, 9H), 2.06 – 1.97 (m, 16H), 1.62 (s, 11H), 1.61 (d,  $J = 1.0$  Hz, 14H), 1.53 (s, 14H);  $^{13}\text{C}$  NMR (101 MHz,  $\text{CDCl}_3$ )  $\delta$  141.1, 137.0, 131.7, 129.7, 128.7, 123.9, 120.5, 120.2, 67.1, 63.3, 39.6, 26.3, 25.7, 17.7, 16.5; HRMS (ESI+TOF) calcd. for:  $\text{C}_{19}\text{H}_{26}\text{N}_3\text{O}$  312.2076  $[\text{M}+\text{H}]^+$ , found 312.2077.

**General Procedure for gram scale reaction.**

To an oven-dried 100 ml round bottom flask charged with a magnetic stir bar was added aryl hydrazine hydrochloride **1** (100 mg, 0.574-0.694 mmol, 1 equiv.) followed by *tert.* Butyl nitrite (1 equiv.) in PEG-400: $\text{H}_2\text{O}$  (5 mL, 2:1) was stirred at 0 °C for 30 minutes. The progress of the reaction was observed using TLC to monitor the conversion of aryl hydrazine hydrochloride to phenyl azide (*in situ*) **2**. Then alkyne (1.0 equiv.) followed by  $\text{CuSO}_4 \cdot 5\text{H}_2\text{O}$  (0.1 equiv.) and Sod. Ascorbate (0.05 equiv.) were added to the reaction mixture. The reaction mixture was warmed to room temperature and the stirring was continued for 8-12 h overnight after the reaction was complete as monitored by TLC. The reaction mixture was diluted with  $\text{H}_2\text{O}$ , and the precipitate formed was filtered and dried in vacuo to afford the corresponding triazoles.

## Calculation of Green Metrics and Formulas Used

### 1. Yield (%)

The efficiency of a reaction in converting starting materials into the desired product.

$$\text{Formula: Yield (\%)} = \frac{\text{Mass of product obtained}}{\text{Theoretical mass of product}} \times 100 \quad \dots\dots\dots\text{Eq. 1}$$

### 2. E-factor

The mass of waste generated per mass of product.

$$\text{Formula: E-factor} = \frac{\text{Total waste generated}}{\text{Mass of product}} \quad \dots\dots\dots\text{Eq. 2}$$

### 3. PMI (Process Mass Intensity)

The total mass of all materials used per mass of product.

$$\text{Formula: PMI} = \frac{\text{Total mass input (including solvents,water,reagents)}}{\text{Mass of product}} \quad \dots\dots\text{Eq. 3}$$

### 4. WWI (Water Waste Intensity)

The mass of water used per mass of product.

$$\text{Formula: WWI} = \frac{\text{Total water used}}{\text{Mass of product}} \quad \dots\dots\dots\text{Eq. 4}$$

## Calculation of the Green Chemistry Metrics for the gram-scale synthesis of 1,4-diphenyl-1H-1,2,3-triazole (3a)

### Reaction Stoichiometry

| Entry | Reagent                       | Formula                                               | MW (g/mol) | Mass (g) | mmol    | Equiv. |
|-------|-------------------------------|-------------------------------------------------------|------------|----------|---------|--------|
| 1     | Phenylhydrazine hydrochloride | C <sub>6</sub> H <sub>5</sub> NHNH <sub>2</sub> · HCl | 144.60     | 5.0      | 34.5781 | 1.0    |
| 2     | <i>tert</i> -Butyl nitrite    | C <sub>4</sub> H <sub>9</sub> NO <sub>2</sub>         | 103.12     | 3.56     | 34.5781 | 1.0    |
| 3     | Phenylacetylene               | C <sub>8</sub> H <sub>6</sub>                         | 102.13     | 3.53     | 34.5781 | 1.0    |
| 4     | Sodium ascorbate              | C <sub>6</sub> H <sub>7</sub> NaO <sub>6</sub>        | 198.11     | 0.68     | 3.4578  | 0.1    |
| 5     | Copper sulfate pentahydrate   | CuSO <sub>4</sub> · 5H <sub>2</sub> O                 | 249.69     | 0.43     | 1.728   | 0.05   |

### Solvents & Processing Conditions

| Solvent  | Total Volume Used (mL) | Type       | Amount Considered (g) | Note                                           |
|----------|------------------------|------------|-----------------------|------------------------------------------------|
| PEG-400* | 50                     | Recyclable | 5                     | 10% loss considered per cycle <sup>11-17</sup> |
| Water    | 60                     | Recyclable | 6                     | 10% loss considered per cycle                  |

\* PEG-400 was considered a recyclable solvent based on literature reports.<sup>11-17</sup>

### Product & Yield

| Product                             | Formula                                        | MW     | Isolated Yield (g) | Yield (%) |
|-------------------------------------|------------------------------------------------|--------|--------------------|-----------|
| 1,4-Diphenyl-1H-1,2,3-triazole (3a) | C <sub>14</sub> H <sub>11</sub> N <sub>3</sub> | 221.26 | 7.5                | 98        |

### Green Chemistry Metrics

| Metric                  | Calculation                                          | Value |
|-------------------------|------------------------------------------------------|-------|
| E-factor (Eq. 2)        | 10.7* ÷ 7.50                                         | 1.42  |
| PMI (Eq. 3)             | (5.0 + 3.56 + 3.53 + 0.68 + 0.43 + 50 + 60) ÷ 7.50 g | 16.42 |
| Water Intensity (Eq. 4) | 50 ÷ 7.5 g                                           | 6.6   |

\*Amount of waste = (Amount of reagents - Amount of final product) + Solvent loss = {(5.0+3.56+3.53+0.68+0.43) - 7.5}g + 5 = 10.7 g

## Calculation of Green Metrics of Literature Reports

Literature 1: Kaboudin *et al.*<sup>18</sup>

### Reaction Stoichiometry

| Entry | Reagent                              | Formula                                       | MW (g/mol) | Mass (g) | mmol | Equiv. |
|-------|--------------------------------------|-----------------------------------------------|------------|----------|------|--------|
| 1     | Phenylboronic acid                   | C <sub>6</sub> H <sub>7</sub> BO <sub>2</sub> | 121.93     | 0.122    | 1.0  | 1.0    |
| 2     | Sodium azide                         | NaN <sub>3</sub>                              | 65.01      | 0.195    | 3.0  | 1.0    |
| 3     | Phenylacetylene                      | C <sub>8</sub> H <sub>6</sub>                 | 102.13     | 0.102    | 1.0  | 1.0    |
| 4     | Cu <sub>2</sub> -β-CD complex        | -                                             | 1198.6     | 0.065    | 0.05 | 0.1    |
| 5     | Sodium sulfate                       | Na <sub>2</sub> SO <sub>4</sub>               | 142.03     | 10       | -    | -      |
| 6     | NaOH                                 | NaOH                                          | 40.0       | 1.0      | 1.0  | 1.0    |
| 7     | β-Cyclodextrin                       | -                                             | 1134.98    | 1.1      | 1.0  | 1.0    |
| 8     | CuSO <sub>4</sub> ·5H <sub>2</sub> O | -                                             | 249.69     | 2.5      | 3.0  | 3.0    |

### Solvents & Processing Conditions

| Solvent | Total Volume Used (mL) | Type       | Amount Considered (g) | Note                |
|---------|------------------------|------------|-----------------------|---------------------|
| DCM     | 50                     | Recyclable | 5                     | 10% loss considered |
| Hexane  | 10                     | Recyclable | 1                     | 10% loss considered |
| Ethanol | 400                    | Recyclable | 40                    | 10% loss considered |
| Water   | 124                    | Recyclable | 12.4                  | 10% loss considered |

### Product & Yield

| Product                        | Formula                                        | MW     | Isolated Yield (g) | Yield (%) |
|--------------------------------|------------------------------------------------|--------|--------------------|-----------|
| 1,4-Diphenyl-1H-1,2,3-triazole | C <sub>14</sub> H <sub>11</sub> N <sub>3</sub> | 221.26 | 0.21               | 94        |

### Green Chemistry Metrics

| Metric                  | Calculation                                                     | Value   |
|-------------------------|-----------------------------------------------------------------|---------|
| E-factor (Eq. 2)        | 61.87* ÷ 0.210                                                  | 294.62  |
| PMI (Eq. 3)             | (0.122+0.195+0.102+0.065+40+10+10+47.5+5+50+400+72.5) ÷ 0.210 g | 3026.11 |
| Water Intensity (Eq. 4) | (49+3+72.5) ÷ 0.210                                             | 592.85  |

\*Amount of waste = (Amount of reagents - Amount of final product) + Solvent loss = {(0.122+0.195+0.102+0.065+10+1+1.1+2.5) - 0.21}g + (5 + 1 + 40) = 60.87 g

## Literature-2 Fokin et al<sup>19</sup>

### Reaction Stoichiometry

| Entry | Reagent                          | Formula                                        | MW (g/mol) | Mass (g) | mmol  | Equiv. |
|-------|----------------------------------|------------------------------------------------|------------|----------|-------|--------|
| 1     | Iodobenzene                      | C <sub>6</sub> H <sub>5</sub> I                | 204.01     | 0.102    | 1.0   | 1.0    |
| 2     | 1-Chloro-4-prop-2-ynyloxybenzene | C <sub>9</sub> H <sub>7</sub> ClO              | 166.60     | 0.084    | 3.0   | 1.0    |
| 3     | L-Proline                        | C <sub>5</sub> H <sub>9</sub> NO <sub>2</sub>  | 115.13     | 0.012    | 0.1   | 0.2    |
| 4     | Sodium Carbonate                 | Na <sub>2</sub> CO <sub>3</sub>                | 105.98     | 0.012    | 0.1   | 0.2    |
| 5     | Sodium Azide                     | NaN <sub>3</sub>                               | 65.01      | 0.039    | 0.6   | 1.2    |
| 6     | Sodium Ascorbate                 | C <sub>6</sub> H <sub>7</sub> NaO <sub>6</sub> | 198.11     | 0.020    | 0.05  | 0.1    |
| 7     | Copper Sulfate pentahydrate      | CUSO <sub>4</sub> .5H <sub>2</sub> O           | 249.69     | 0.013    | 0.025 | 0.05   |
| 8     | Ammonium Hydroxide               | NH <sub>4</sub> OH                             | 35.04      | 4.0      | -     |        |
| 9     | Sodium Chloride                  | NaCl                                           | 58.43      | 5.0      | -     |        |

### Solvents & Processing Conditions

| Solvent      | Total Volume Used (mL) | Type       | Amount Considered (g) | Note                |
|--------------|------------------------|------------|-----------------------|---------------------|
| DMSO         | 50                     | Recyclable | 5                     | 10% loss considered |
| Ethylacetate | 60                     | Recyclable | 6                     | 10% loss considered |
| <b>Water</b> | 100.1                  | Recyclable | 10.01                 | 10% loss considered |

### Product & Yield

| Product                                                 | Formula                                                       | MW     | Isolated Yield (g) | Yield (%) |
|---------------------------------------------------------|---------------------------------------------------------------|--------|--------------------|-----------|
| 4-((4-methoxyphenoxy)methyl)-1-phenyl-1H-1,2,3-triazole | C <sub>16</sub> H <sub>15</sub> N <sub>3</sub> O <sub>2</sub> | 281.31 | 0.211              | 83        |

### Green Chemistry Metrics

| Metric                  | Calculation                                  | Value  |
|-------------------------|----------------------------------------------|--------|
| E-factor (Eq. 2)        | 20.071* ÷ 0.211                              | 95.12  |
| PMI (Eq. 3)             | (0.282+0.10+60+40+30+30+5+4+1+1.1) ÷ 0.211 g | 807.48 |
| Water Intensity (Eq. 4) | (60 +0.1+40) ÷ 0.211 g                       | 474.40 |

\*Amount of waste = (Amount of reagents - Amount of final product) + Solvent loss = {(0.102+0.084+0.012+0.012+0.39+0.020+0.013+4+5- 0.21 )g + (5 + 6) = 20.071 g

### Literature-3 Ranu *et. al*<sup>20</sup>

#### Reaction Stoichiometry

| Entry | Reagent                           | Formula                                       | MW (g/mol) | Mass (g) | mmol | Equiv. |
|-------|-----------------------------------|-----------------------------------------------|------------|----------|------|--------|
| 1     | Phenylboronic Acid                | C <sub>6</sub> H <sub>7</sub> BO <sub>2</sub> | 121.93     | 0.122    | 1.0  | 1.0    |
| 2     | Potassium Carbonate               | K <sub>2</sub> CO <sub>3</sub>                | 138.20     | 0.138    | 1.0  | -      |
| 3     | Sodium Azide                      | NaN <sub>3</sub>                              | 65.01      | 0.195    | 3.0  | -      |
| 4     | Cu/Al <sub>2</sub> O <sub>3</sub> | CuAl <sub>2</sub> O <sub>4</sub>              | 181.51     | 0.400    | 0.01 | 0.1    |
| 5     | Phenylacetylene                   | C <sub>8</sub> H <sub>6</sub>                 | 102.13     | 0.102    | 1.0  | 1.0    |
| 6     | Copper Sulfate pentahydrate       | CUSO <sub>4</sub> .5 H <sub>2</sub> O         | 249.69     | 1.0      | 4.0  | -      |
| 7     | Sodium Chloride                   | NaCl                                          | 58.43      | 5.0      |      |        |
| 8     | Alumina                           | Al <sub>2</sub> O <sub>3</sub>                | 101.96     | 15.0     |      | -      |

#### Solvents & Processing Conditions

| Solvent      | Total Volume Used (mL) | Type       | Amount Considered (g) | Note                |
|--------------|------------------------|------------|-----------------------|---------------------|
| Ethanol      | 10                     | Recyclable | 1.0                   | 10% loss considered |
| Hexane       | 20                     | Recyclable | 2.0                   | 10% loss considered |
| Ethylacetate | 20                     | Recyclable | 2.0                   | 10% loss considered |
| Water        | 68                     | Recyclable | 6.8                   | 10% loss considered |

#### Product & Yield

| Product                                 | Formula                                        | MW     | Isolated Yield (g) | Yield (%) |
|-----------------------------------------|------------------------------------------------|--------|--------------------|-----------|
| 1,4-Diphenyl-1 <i>H</i> -1,2,3-triazole | C <sub>14</sub> H <sub>11</sub> N <sub>3</sub> | 221.26 | 0.203              | 91        |

#### Green Chemistry Metrics

| Metric                  | Calculation                          | Value  |
|-------------------------|--------------------------------------|--------|
| E-factor (Eq. 2)        | 26.754* ÷ 0.203                      | 131.79 |
| PMI (Eq. 3)             | (26.754+38+30+20+10+10+30) ÷ 0.203 g | 811.59 |
| Water Intensity (Eq. 4) | (38+30) ÷ 0.203 g                    | 334.97 |

\*Amount of waste = (Amount of reagents - Amount of final product) + Solvent loss = {(0.122+0.138+0.195+0.400+0.102+1+5+15)- 0.203 }g + (1+2+2) = 26.754 g

**Literature-4- Portilla *et al.*<sup>21</sup>****Reaction Stoichiometry**

| Entry | Reagent                              | Formula                                                                       | MW (g/mol) | Mass (g) | mmol | Equiv. |
|-------|--------------------------------------|-------------------------------------------------------------------------------|------------|----------|------|--------|
| 1     | Benzyl Bromide                       | C <sub>7</sub> H <sub>7</sub> Br                                              | 171.03     | 2.97     | 1.0  | -      |
| 2     | 1-nitro-4-(prop-2-yn-1-yloxy)benzene | C <sub>9</sub> H <sub>7</sub> NO <sub>3</sub>                                 | 177.15     | 4.429    | 3.0  | -      |
| 3     | Sodium Azide                         | NaN <sub>3</sub>                                                              | 65.01      | 1.625    | 1.0  | -      |
| 4     | CuI Ligand                           | C <sub>29</sub> H <sub>31</sub> CUIN <sub>4</sub> P                           | 657.00     | 3.20     | 0.05 | 0.1    |
| 5     | CuI(PPh <sub>3</sub> ) <sub>4</sub>  | C <sub>72</sub> H <sub>60</sub> Cu <sub>4</sub> I <sub>4</sub> P <sub>4</sub> | 1810.88    | 0.129    | -    | 1.0    |
| 6     | Cesium Carbonate                     | Cs <sub>2</sub> CO <sub>3</sub>                                               | 325.81     | 2.20     | -    | -      |
| 7     | Silica Gel                           | In large amount                                                               |            |          |      |        |

**Solvents & Processing Conditions**

| Solvent       | Total Volume Used (mL) | Type       | Amount Considered (g) | Note                |
|---------------|------------------------|------------|-----------------------|---------------------|
| DCM           | 120                    | Recyclable | 12                    | 10% loss considered |
| Ethyl Acetate | 20                     | Recyclable | 2                     | 10% loss considered |
| Methanol      | 20                     | Recyclable | 2                     | 10% loss considered |
| Water         | 132                    | Recyclable | 13.2                  | 10% loss considered |

**Product & Yield**

| Product                                 | Formula                                        | MW     | Isolated Yield (g) | Yield (%) |
|-----------------------------------------|------------------------------------------------|--------|--------------------|-----------|
| 1,4-diphenyl-1 <i>H</i> -1,2,3-triazole | C <sub>14</sub> H <sub>11</sub> N <sub>3</sub> | 221.26 | 6.98               | 91        |

**Green Chemistry Metrics**

| Metric                  | Calculation                         | Value |
|-------------------------|-------------------------------------|-------|
| E-factor (Eq. 2)        | 23.56* ÷ 6.98                       | 3.37  |
| PMI (Eq. 3)             | (23.56+20+30+30+100+5+5+5) ÷ 6.98 g | 31.31 |
| Water Intensity (Eq. 4) | (30+102) ÷ 6.98                     | 18.91 |

\*Amount of waste = (Amount of reagents - Amount of final product) + Solvent loss = { (2.97+4.42+1.62+3.20+0.13+2.20) - 6.98 } g + (12+2+2) = 23.56 g

## Spectral copies of compounds

### <sup>1</sup>H-NMR of 1,4-Diphenyl-1*H*-1,2,3-triazole (3a)

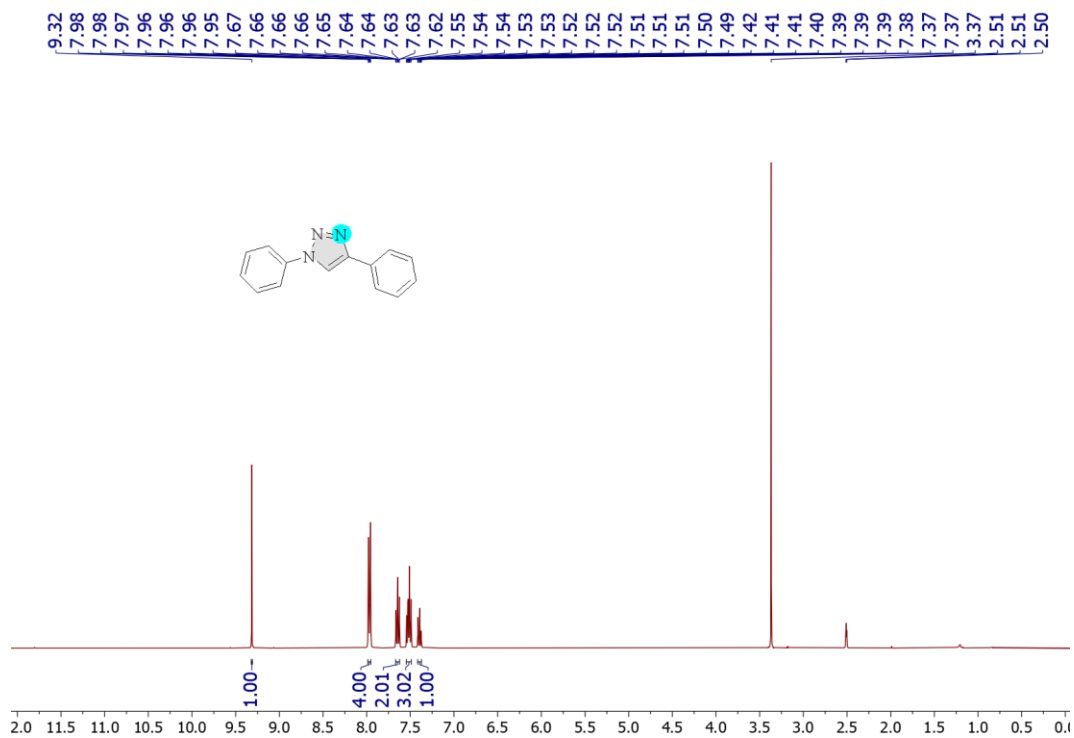

### <sup>13</sup>C-NMR of 1,4-Diphenyl-1*H*-1,2,3-triazole (3a)

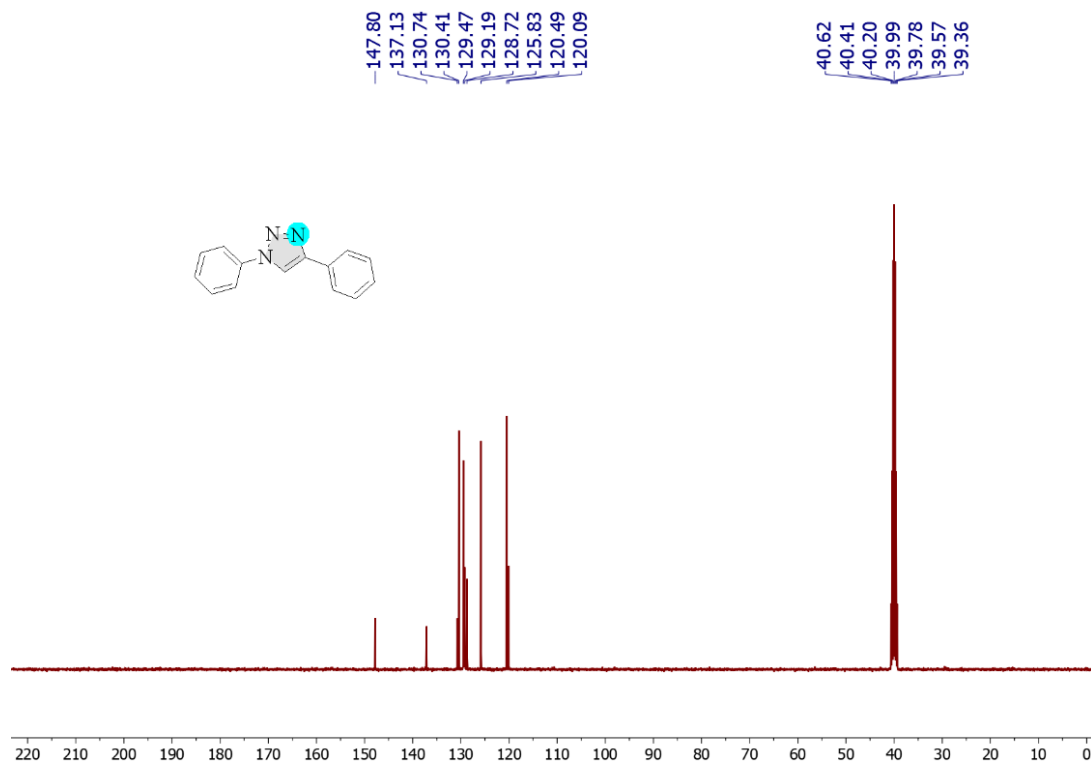

## DEPT of 1,4-Diphenyl-1H-1,2,3-triazole (3a)

130.41  
129.47  
129.19  
128.72  
125.82  
120.48  
120.09

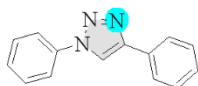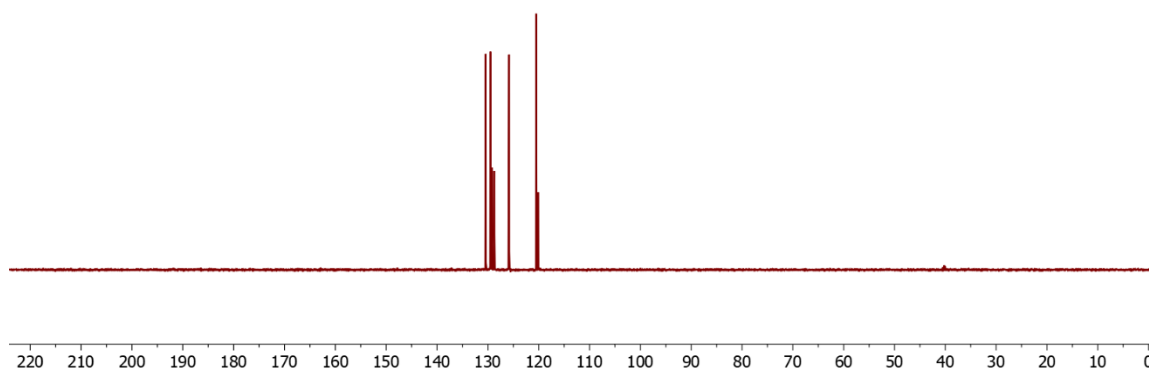

## HRMS of 1,4-Diphenyl-1H-1,2,3-triazole (3a)

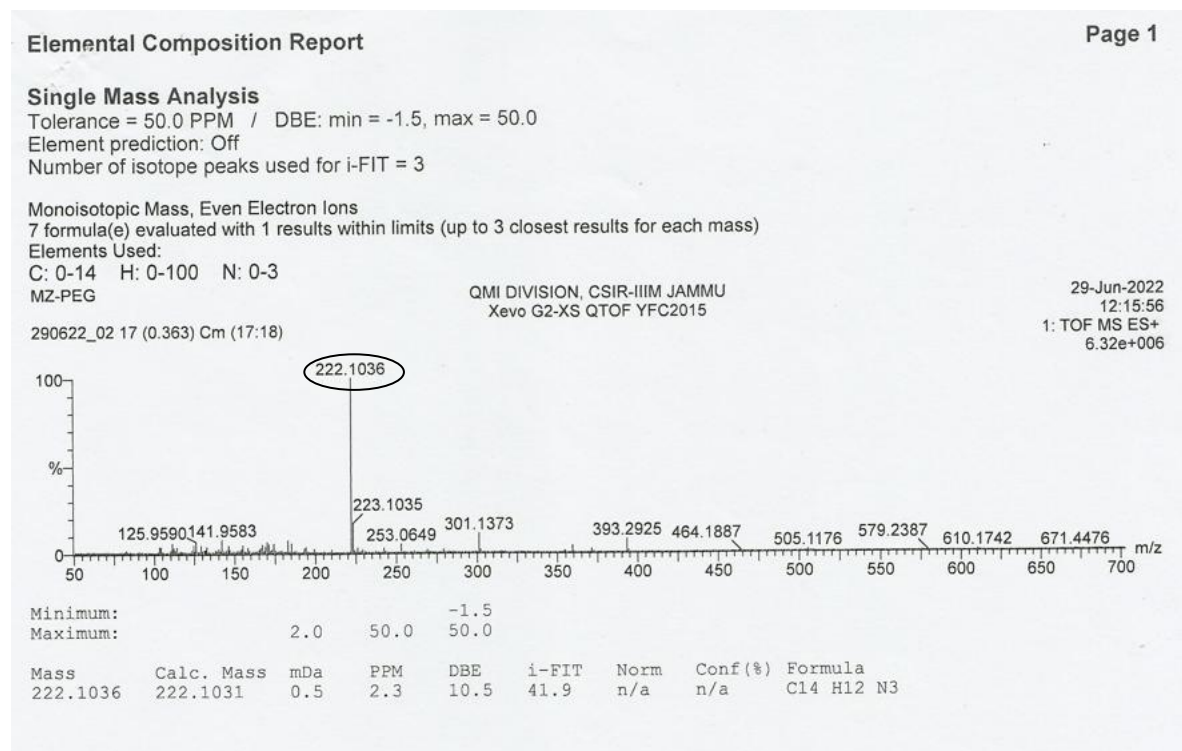

### <sup>1</sup>H-NMR of 1-Phenyl-4-(*p*-tolyl)-1*H*-1,2,3-triazole (3b)

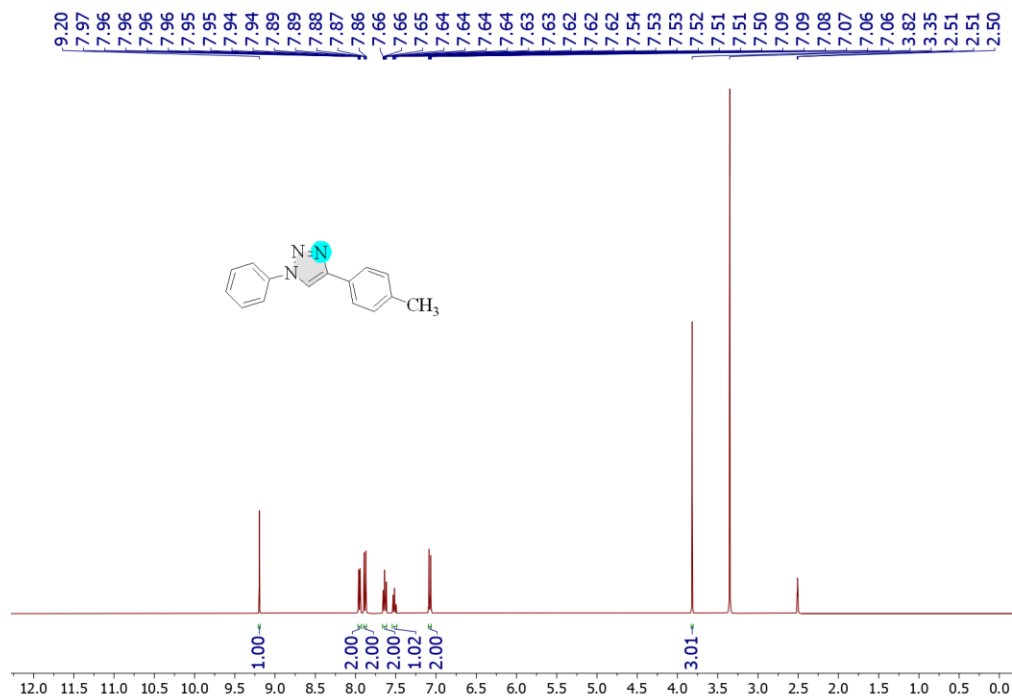

### <sup>13</sup>C-NMR of 1-Phenyl-4-(*p*-tolyl)-1*H*-1,2,3-triazole (3b)

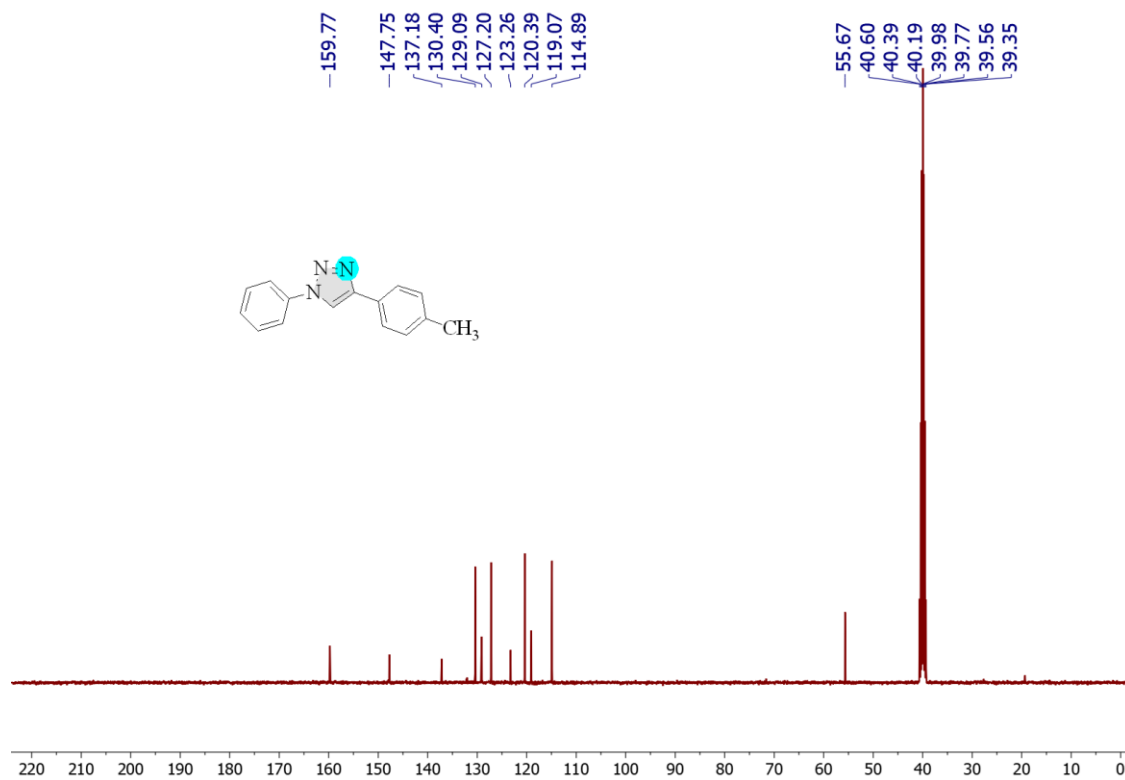

## DEPT of 1-Phenyl-4-(*p*-tolyl)-1*H*-1,2,3-triazole (3b)

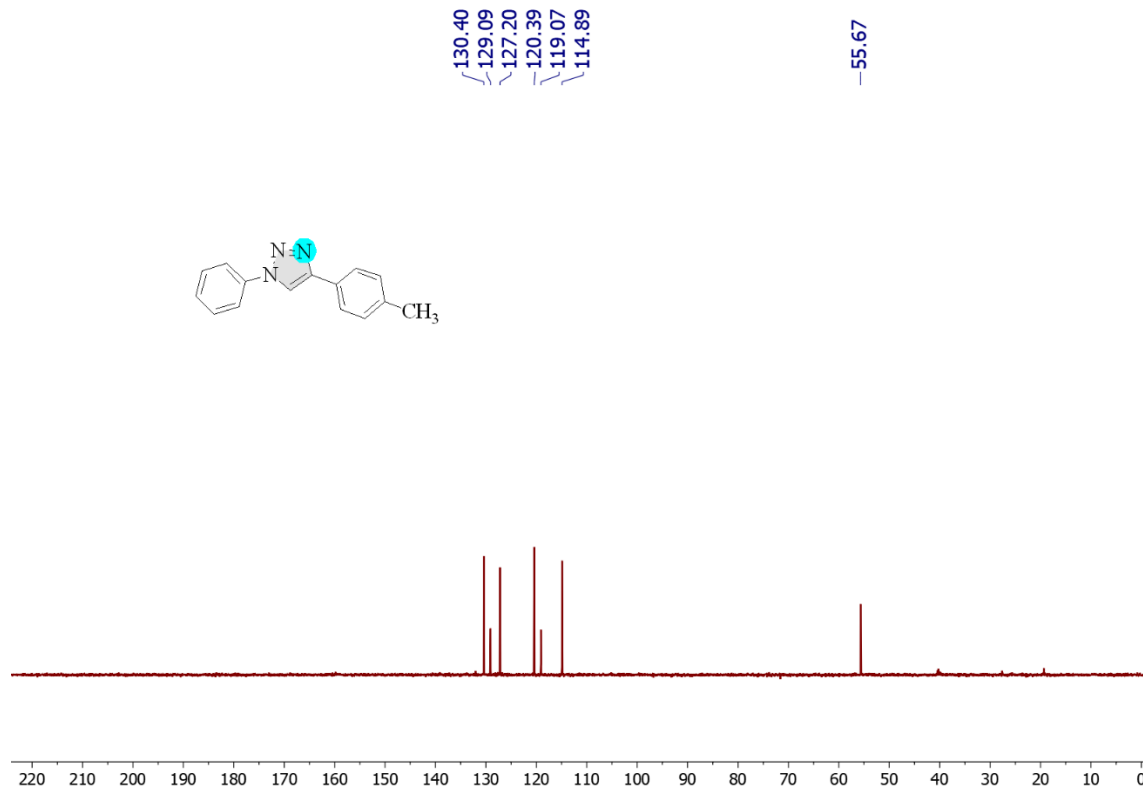

## HRMS of 1-Phenyl-4-(*p*-tolyl)-1*H*-1,2,3-triazole (3b)

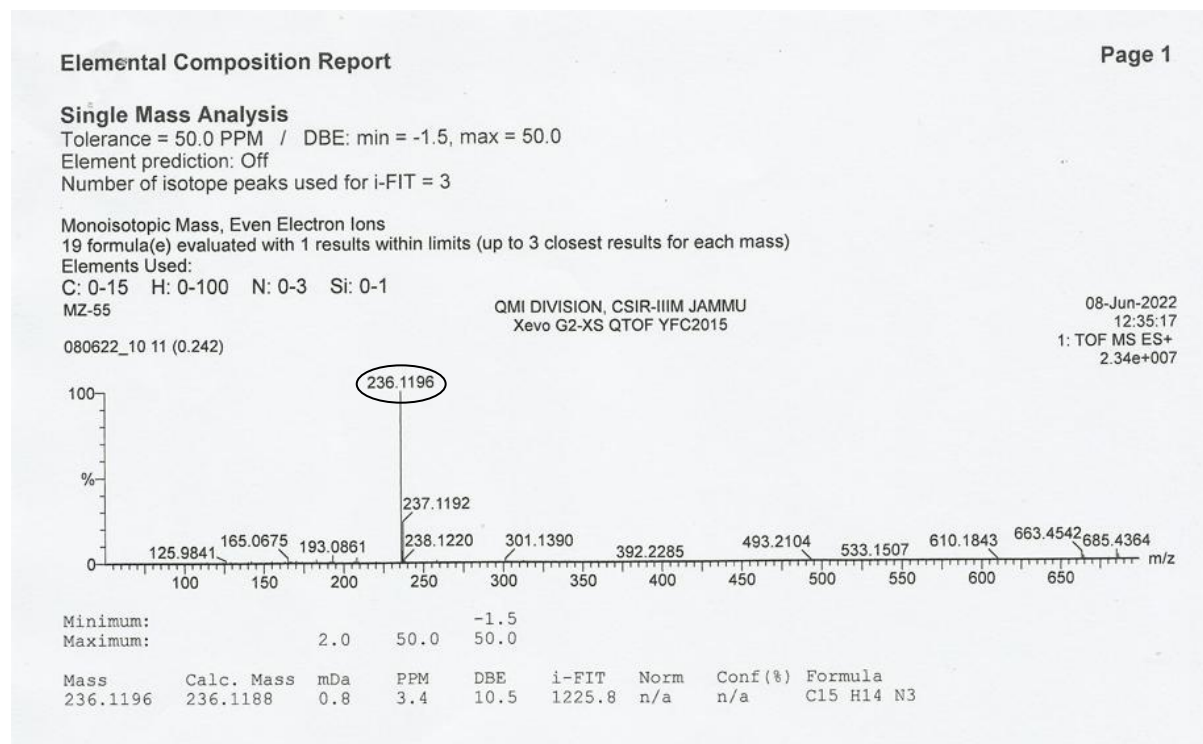

### <sup>1</sup>H-NMR of 4-(4-Ethylphenyl)-1-phenyl-1*H*-1,2,3-triazole (3c)

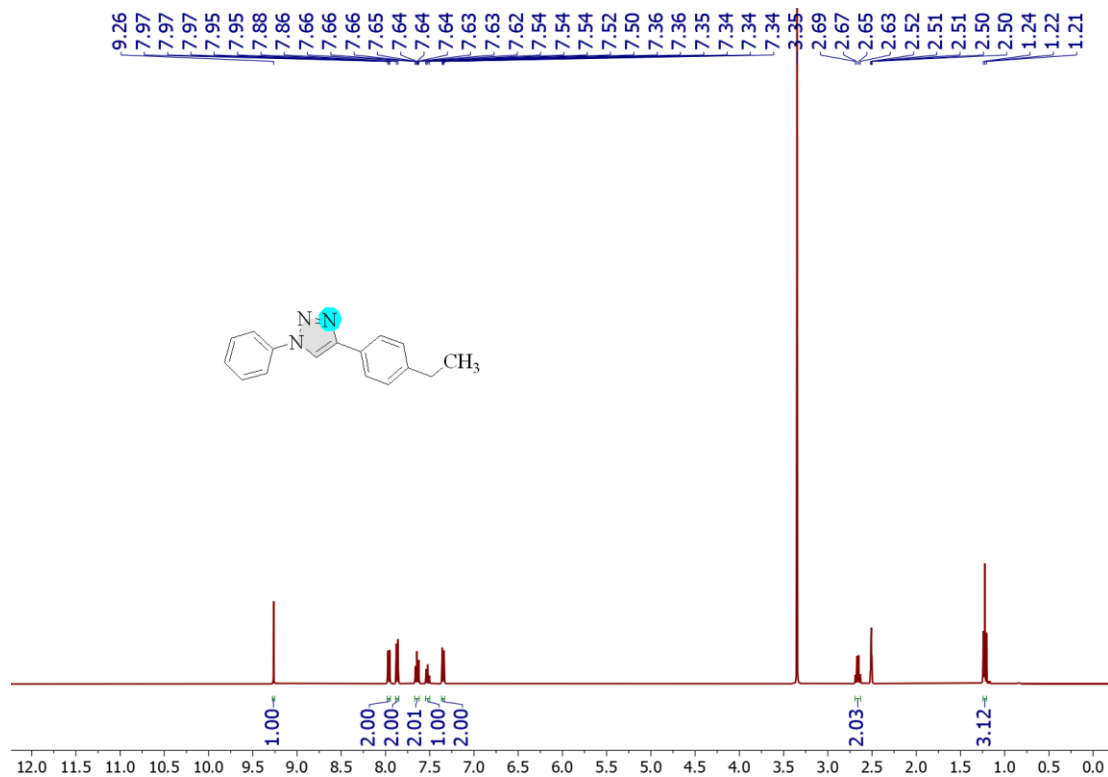

### <sup>13</sup>C-NMR of 4-(4-Ethylphenyl)-1-phenyl-1*H*-1,2,3-triazole (3c)

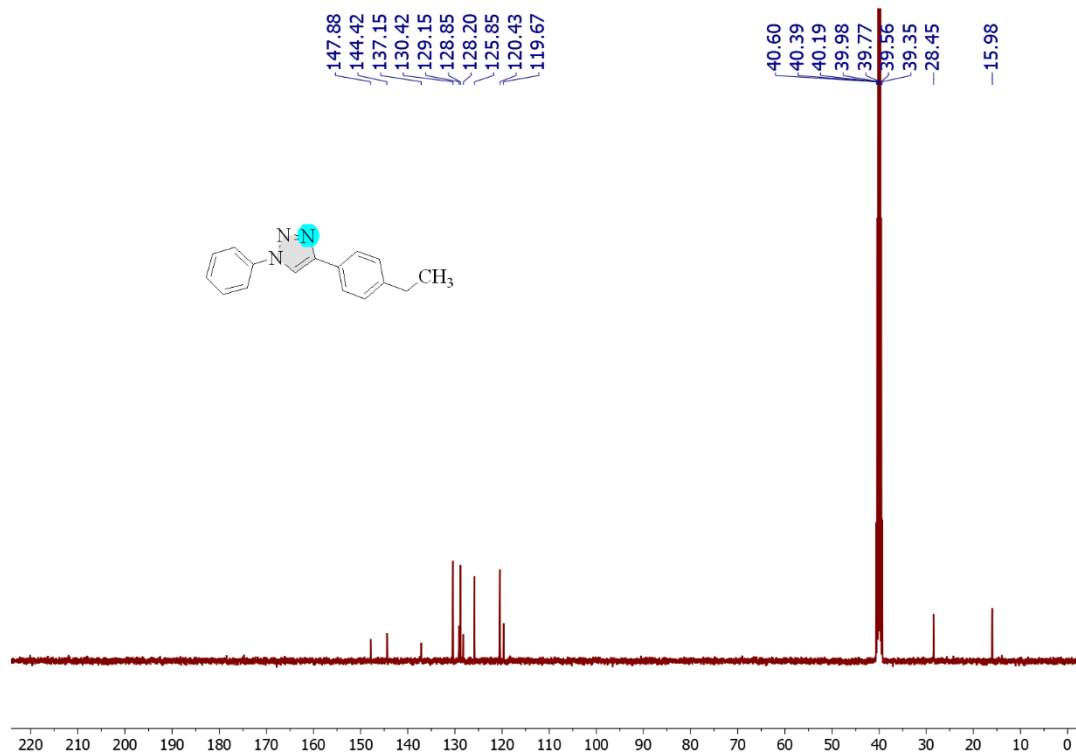

### DEPT of 4-(4-Ethylphenyl)-1-phenyl-1H-1,2,3-triazole (3c)

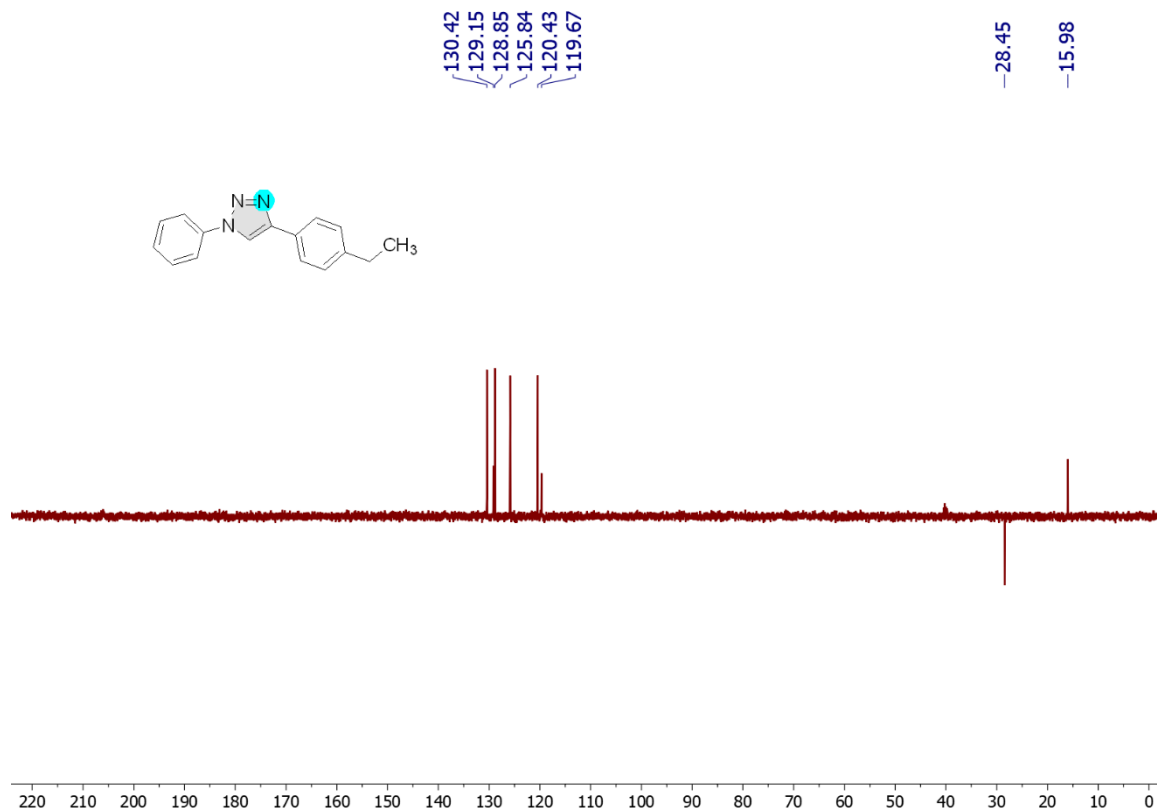

### HRMS of 4-(4-Ethylphenyl)-1-phenyl-1H-1,2,3-triazole (3c)

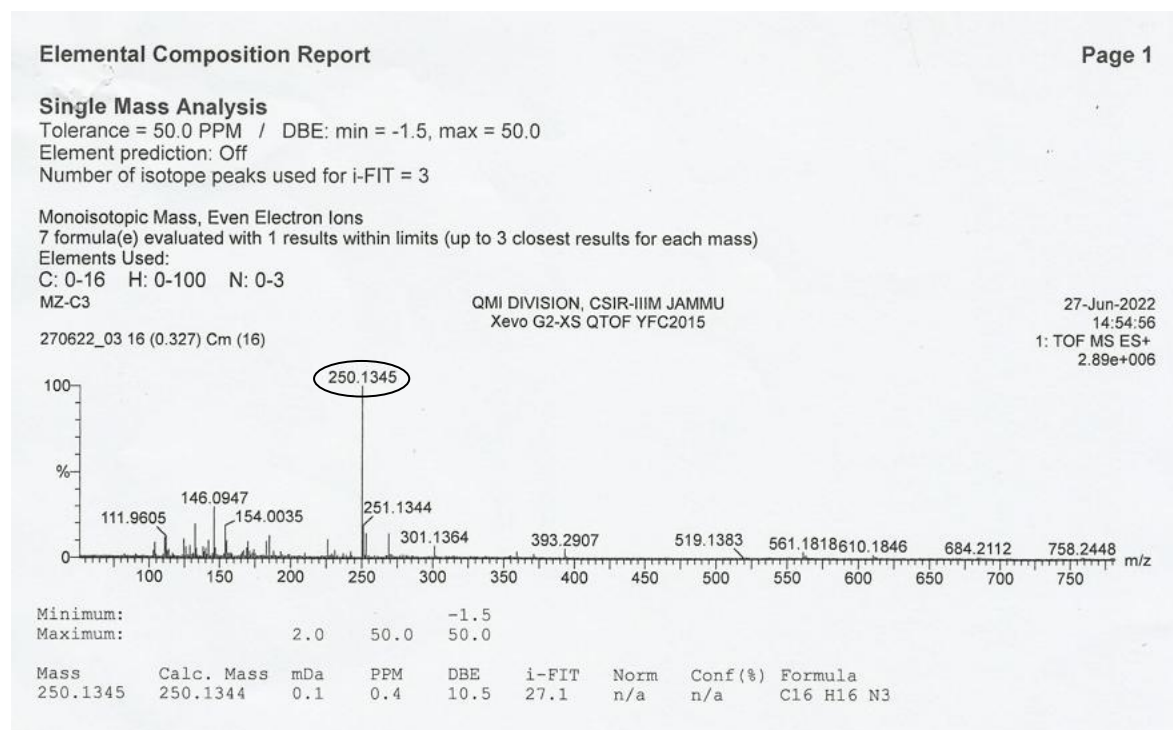

### <sup>1</sup>H-NMR of 4-(4-Butylphenyl)-1-phenyl-4,5-dihydro-1H-1,2,3-triazole (3d)

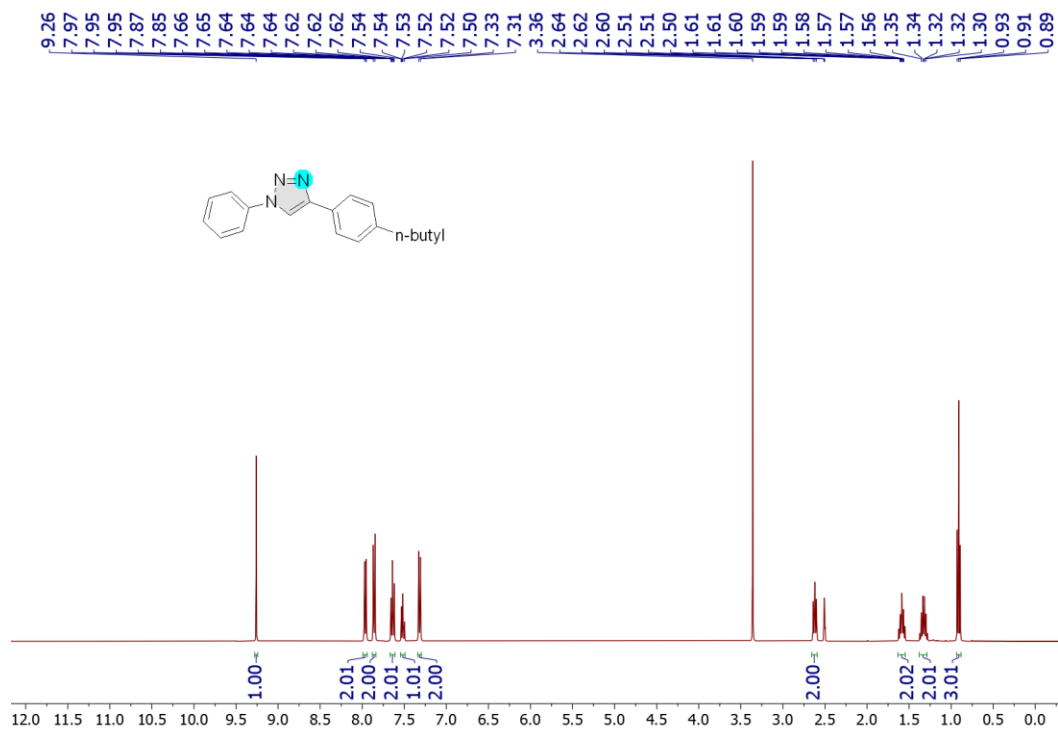

### <sup>13</sup>C-NMR of 4-(4-Butylphenyl)-1-phenyl-4,5-dihydro-1H-1,2,3-triazole (3d)

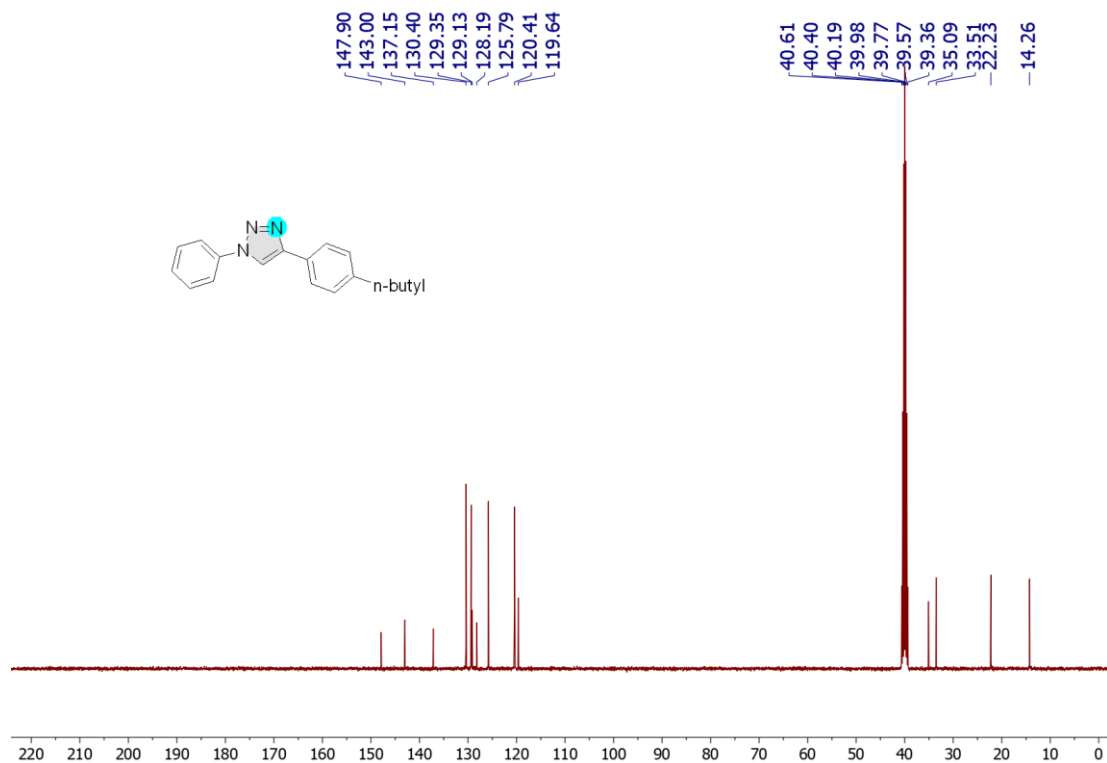

### DEPT of 4-(4-Butylphenyl)-1-phenyl-4,5-dihydro-1H-1,2,3-triazole (3d)

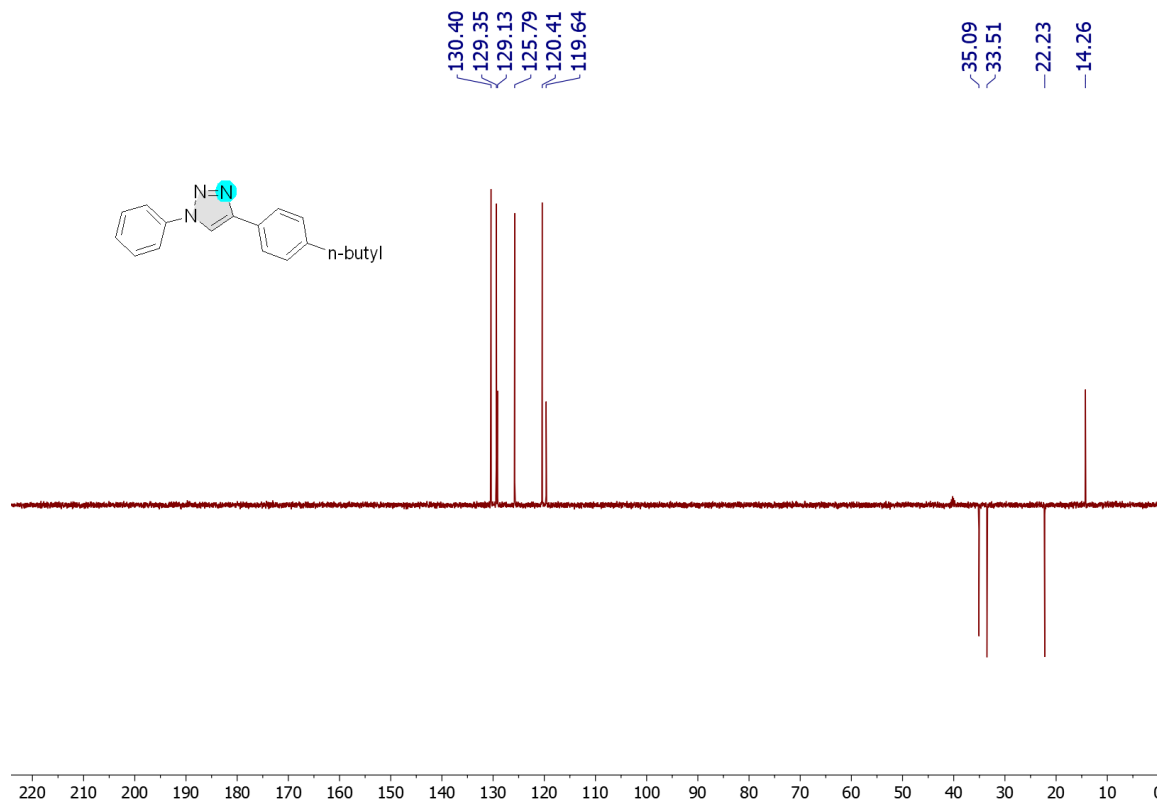

### HRMS of 4-(4-Butylphenyl)-1-phenyl-4,5-dihydro-1H-1,2,3-triazole (3d)

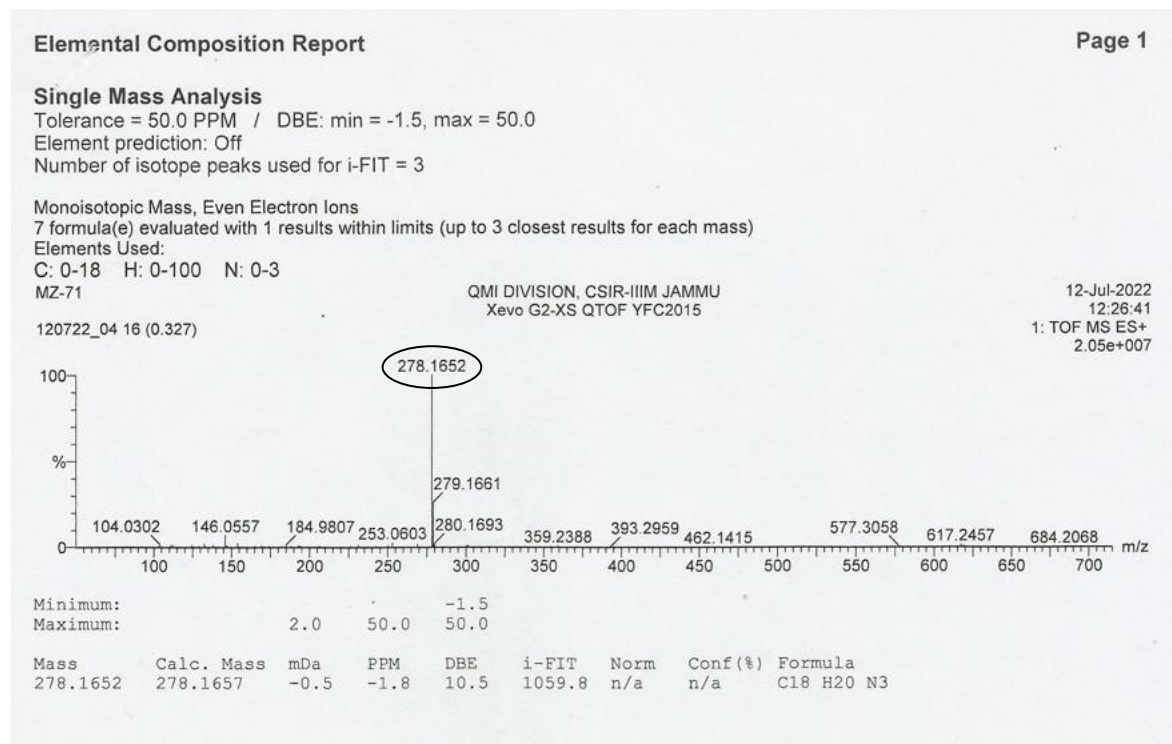

### <sup>1</sup>H-NMR of 4-(4-Methoxyphenyl)-1-phenyl-1H-1,2,3-triazole (3e)

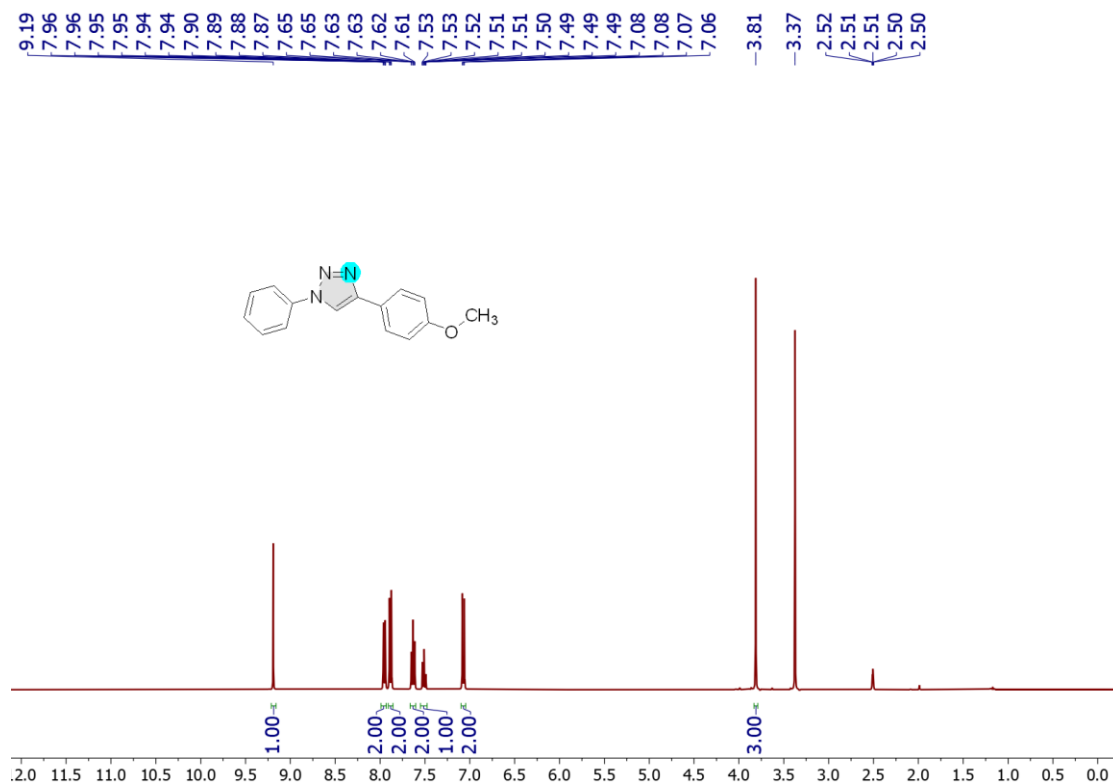

### <sup>13</sup>C-NMR of 4-(4-Methoxyphenyl)-1-phenyl-1H-1,2,3-triazole (3e)

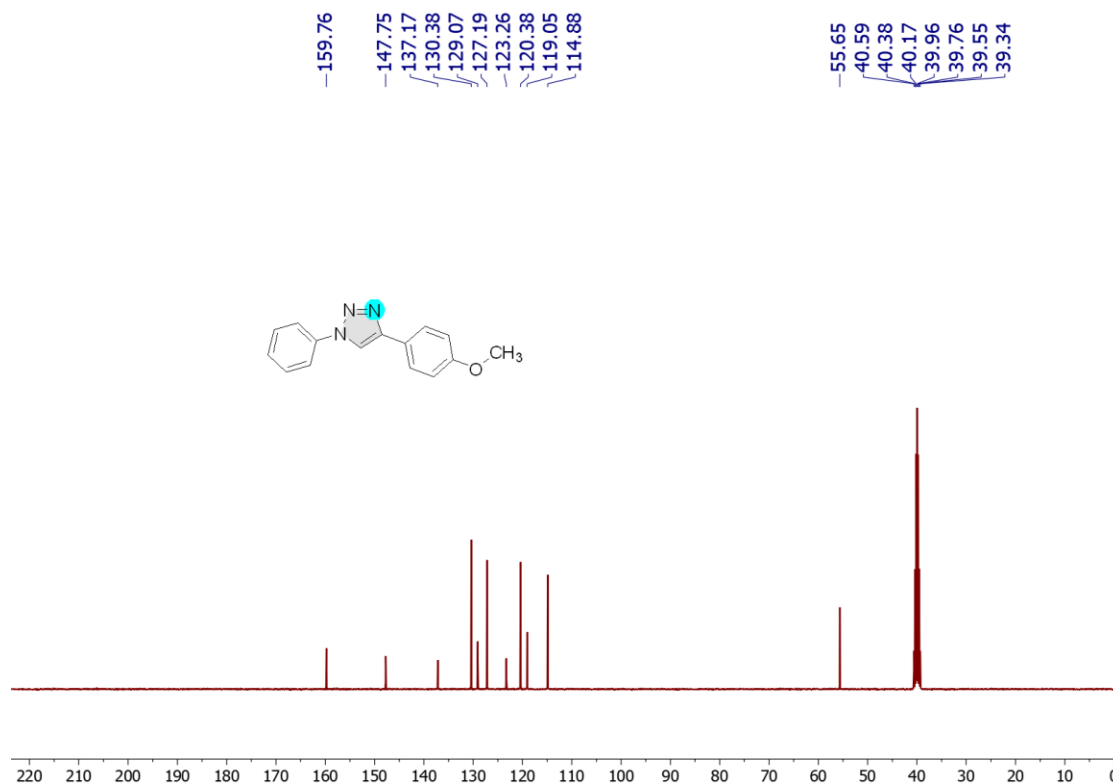

## DEPT of 4-(4-Methoxyphenyl)-1-phenyl-1H-1,2,3-triazole (3e)

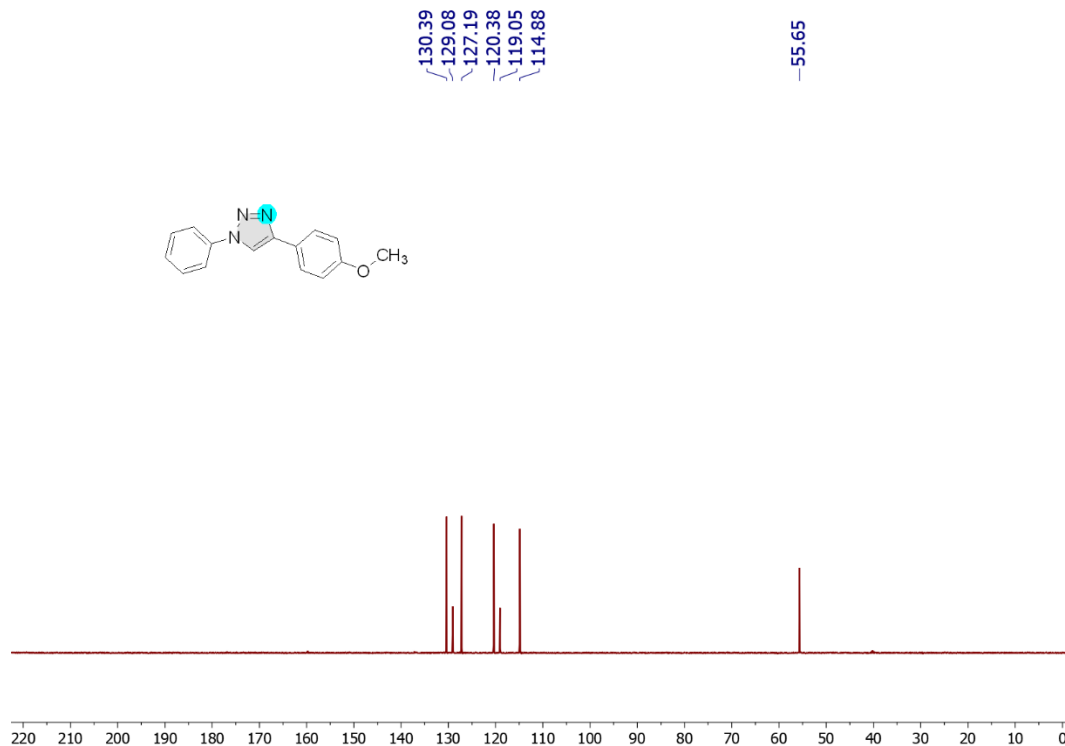

## HRMS of 4-(4-Methoxyphenyl)-1-phenyl-1H-1,2,3-triazole (3e)

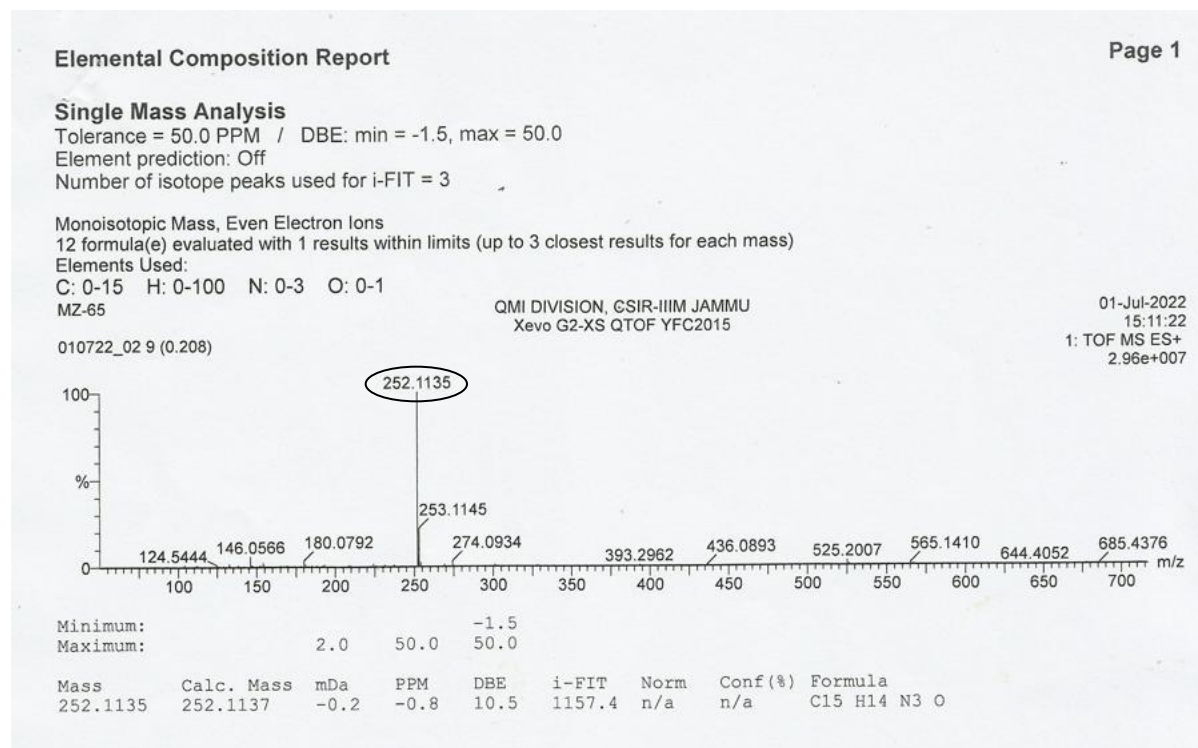

### <sup>1</sup>H-NMR of 4-(3-Chlorophenyl)-1-phenyl-1H-1,2,3-triazole (3f)

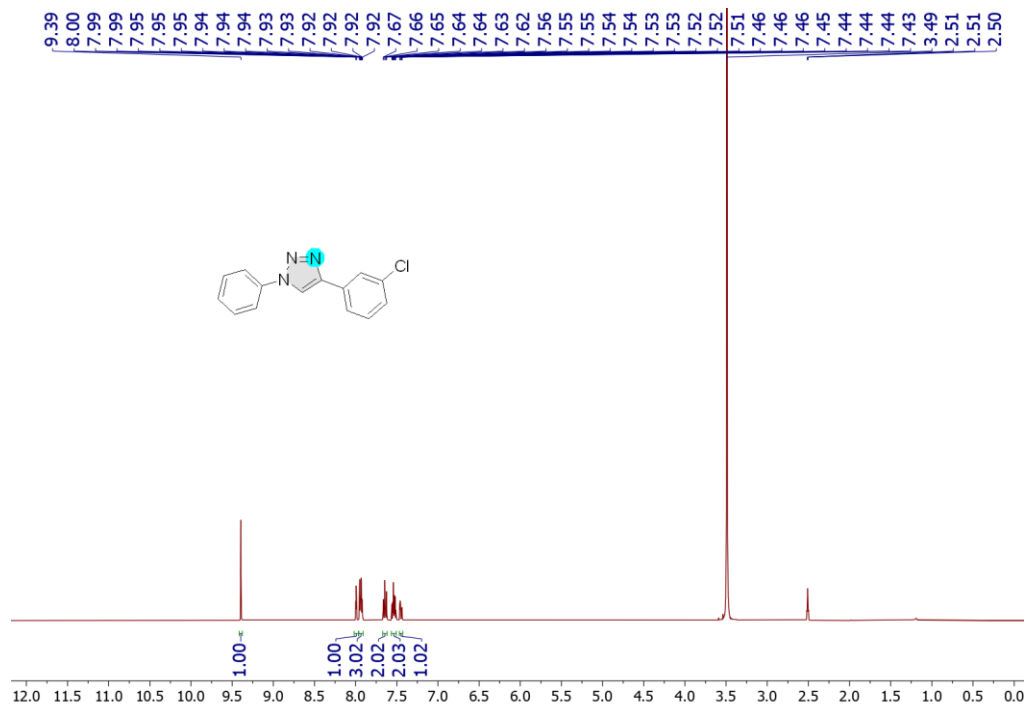

### <sup>13</sup>C-NMR of 4-(3-Chlorophenyl)-1-phenyl-1H-1,2,3-triazole (3f)

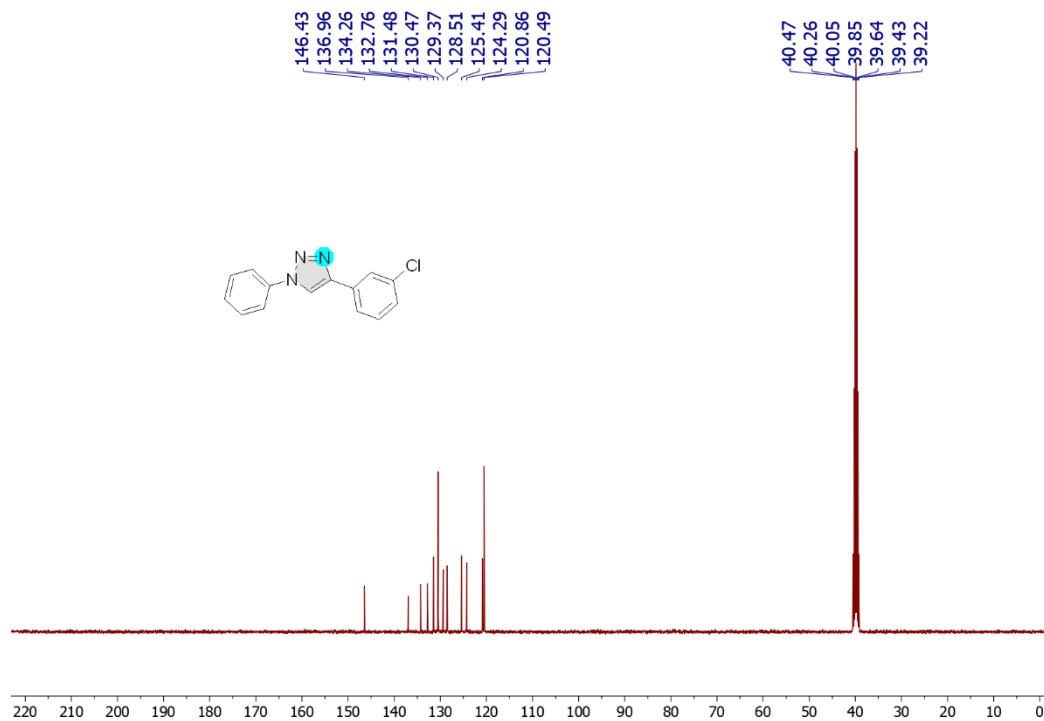

## DEPT of 4-(3-Chlorophenyl)-1-phenyl-1H-1,2,3-triazole (3f)

131.49  
130.48  
129.37  
128.52  
125.40  
124.29  
120.86  
120.48

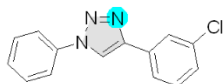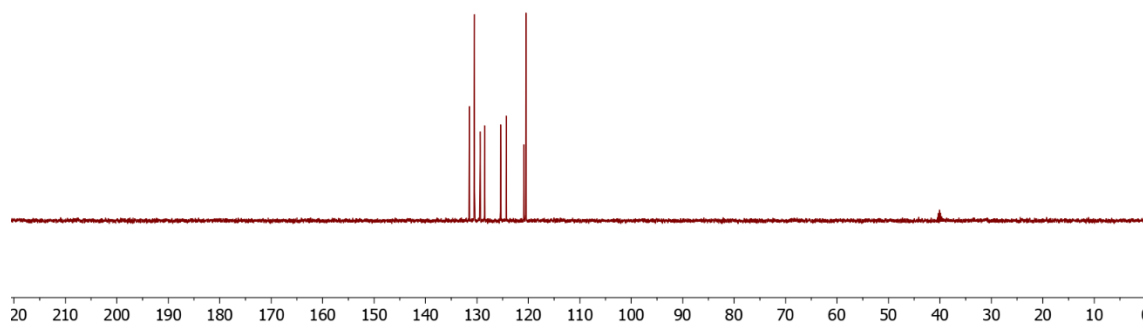

## HRMS of 4-(3-Chlorophenyl)-1-phenyl-1H-1,2,3-triazole (3f)

### Elemental Composition Report

Page 1

#### Single Mass Analysis

Tolerance = 50.0 PPM / DBE: min = -1.5, max = 50.0

Element prediction: Off

Number of isotope peaks used for i-FIT = 3

Monoisotopic Mass, Even Electron Ions

11 formula(e) evaluated with 1 results within limits (up to 3 closest results for each mass)

Elements Used:

C: 0-14 H: 0-100 N: 0-3 Cl: 0-1

MZ-3Cl

QMI DIVISION, CSIR-IIIM JAMMU  
Xevo G2-XS QTOF YFC2015

22-Apr-2024

13:17:43

1: TOF MS ES+

3.94e+007

220424\_02 7 (0.155)

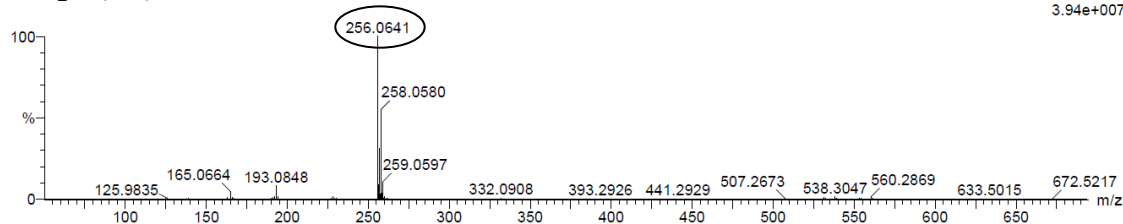

Minimum: -1.5  
Maximum: 2.0 50.0 50.0

| Mass     | Calc. Mass | mDa  | PPM  | DBE  | i-FIT  | Norm | Conf (%) | Formula       |
|----------|------------|------|------|------|--------|------|----------|---------------|
| 256.0641 | 256.0642   | -0.1 | -0.4 | 10.5 | 1265.4 | n/a  | n/a      | C14 H11 N3 Cl |

### <sup>1</sup>H-NMR of 4-(4-Bromophenyl)-1-phenyl-1H-1,2,3-triazole (3g)

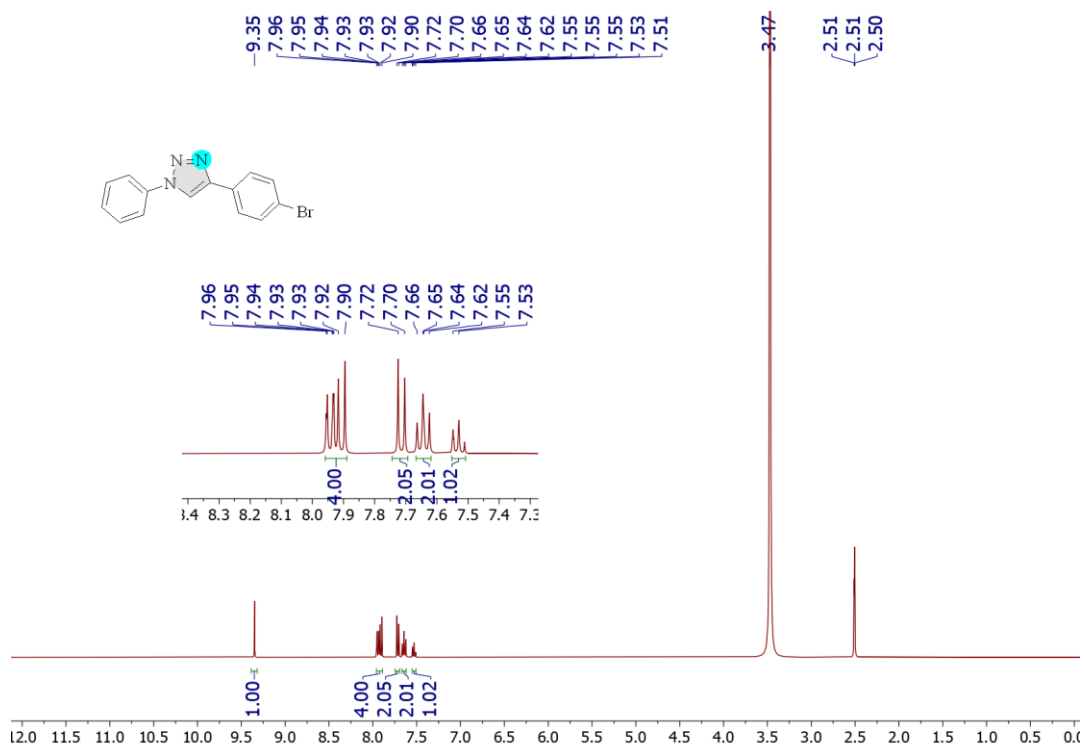

### <sup>13</sup>C-NMR of 4-(4-Bromophenyl)-1-phenyl-1H-1,2,3-triazole (3g)

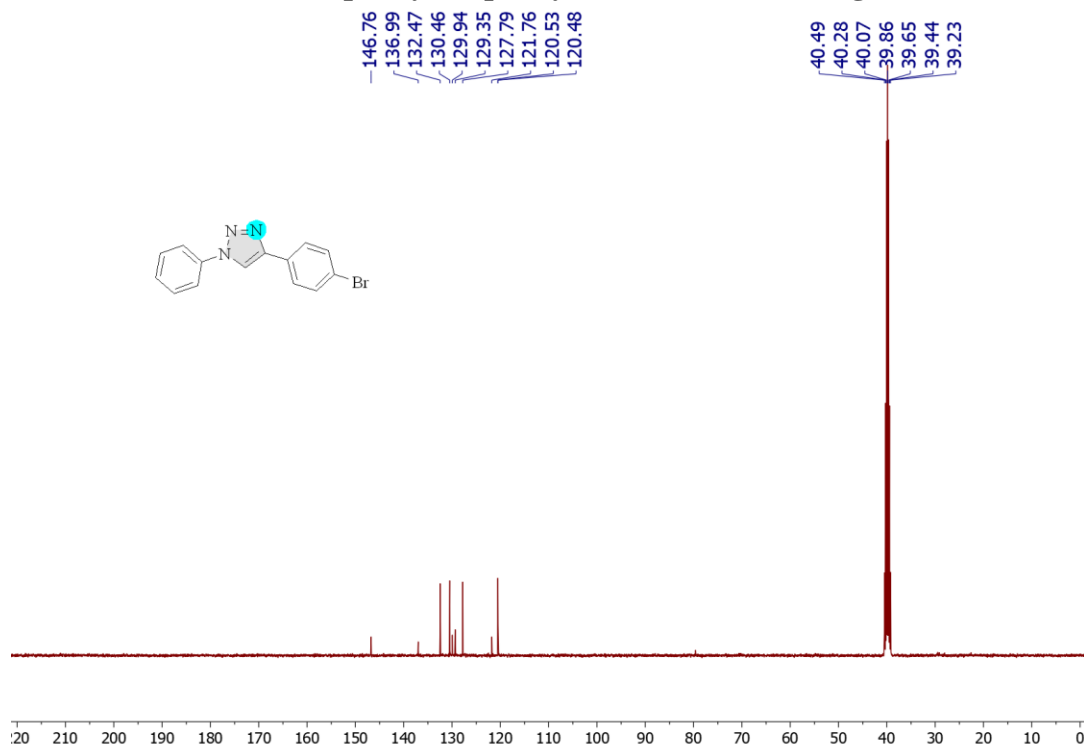

## DEPT of 4-(4-Bromophenyl)-1-phenyl-1H-1,2,3-triazole (3g)

132.48  
130.46  
129.35  
127.79  
120.53  
120.48

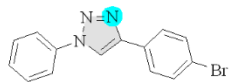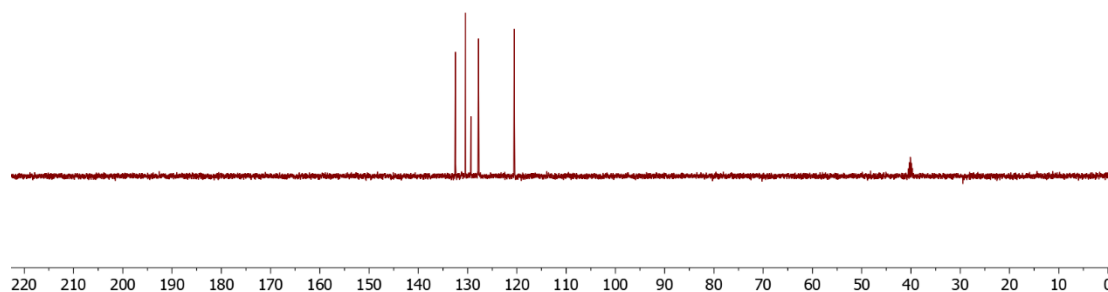

## HRMS of 4-(4-Bromophenyl)-1-phenyl-1H-1,2,3-triazole (3g)

### Elemental Composition Report

Page 1

#### Single Mass Analysis

Tolerance = 50.0 PPM / DBE: min = -1.5, max = 50.0

Element prediction: Off

Number of isotope peaks used for i-FIT = 3

Monoisotopic Mass, Even Electron Ions

11 formula(e) evaluated with 1 results within limits (up to 3 closest results for each mass)

Elements Used:

C: 0-14 H: 0-100 N: 0-3 Br: 0-1

MZ-4Br

QMI DIVISION, CSIR-IIIM JAMMU  
Xevo G2-XS QTOF YFC2015

23-Apr-2024

13:13:04

1: TOF MS ES+

5.50e+005

230424\_25 4 (0.104)

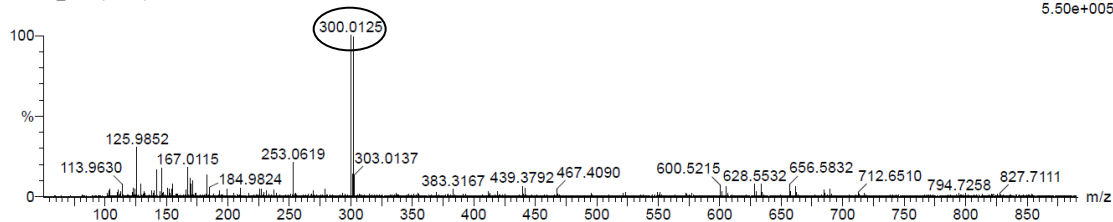

Minimum: -1.5  
Maximum: 50.0

| Mass     | Calc. Mass | mDa  | PPM  | DBE  | i-FIT  | Norm | Conf (%) | Formula       |
|----------|------------|------|------|------|--------|------|----------|---------------|
| 300.0125 | 300.0136   | -1.1 | -3.7 | 10.5 | 1187.6 | n/a  | n/a      | C14 H11 N3 Br |

**<sup>1</sup>H- NMR of 4-(3-Fluorophenyl)-1-phenyl-1H-1,2,3-triazole (3h)**

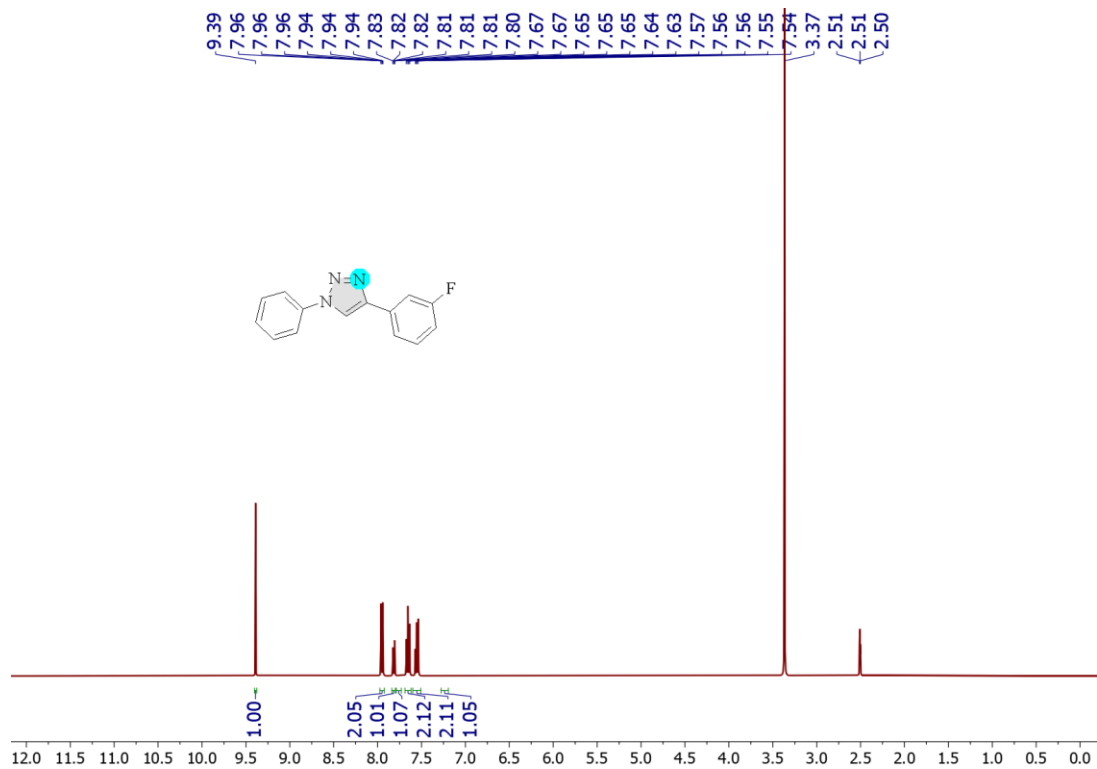

**<sup>13</sup>C- NMR of 4-(3-Fluorophenyl)-1-phenyl-1H-1,2,3-triazole (3h)**

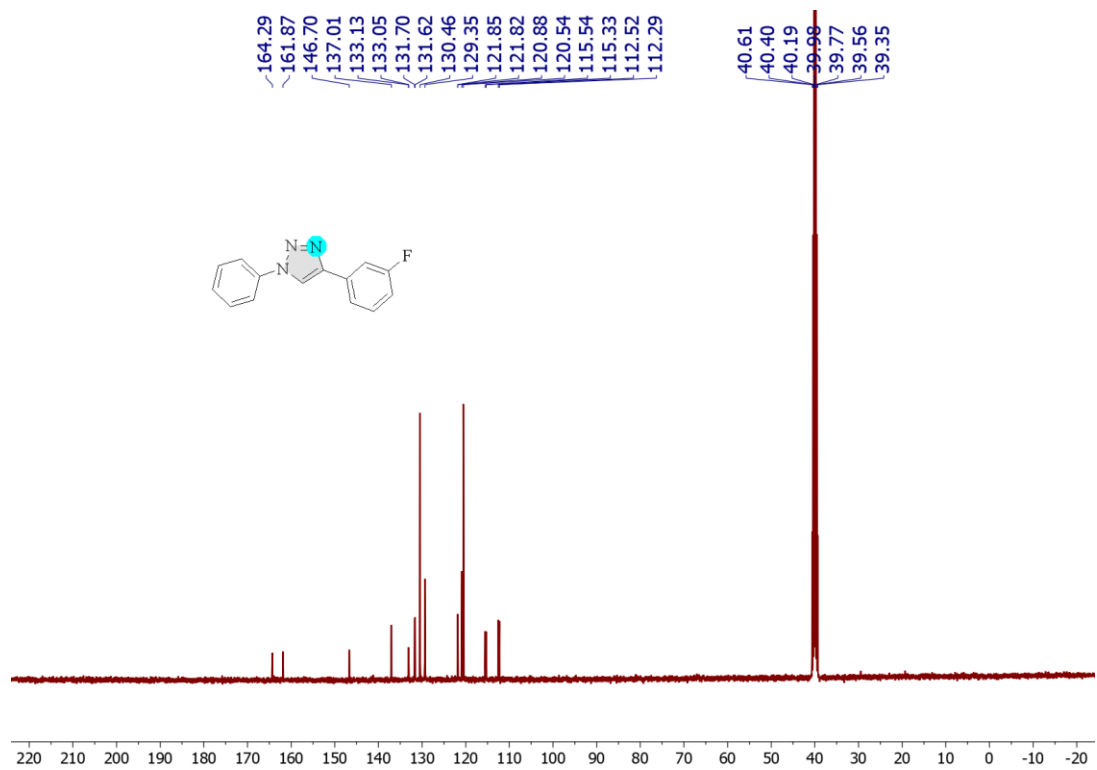

### DEPT of 4-(3-Fluorophenyl)-1-phenyl-1*H*-1,2,3-triazole (3h)

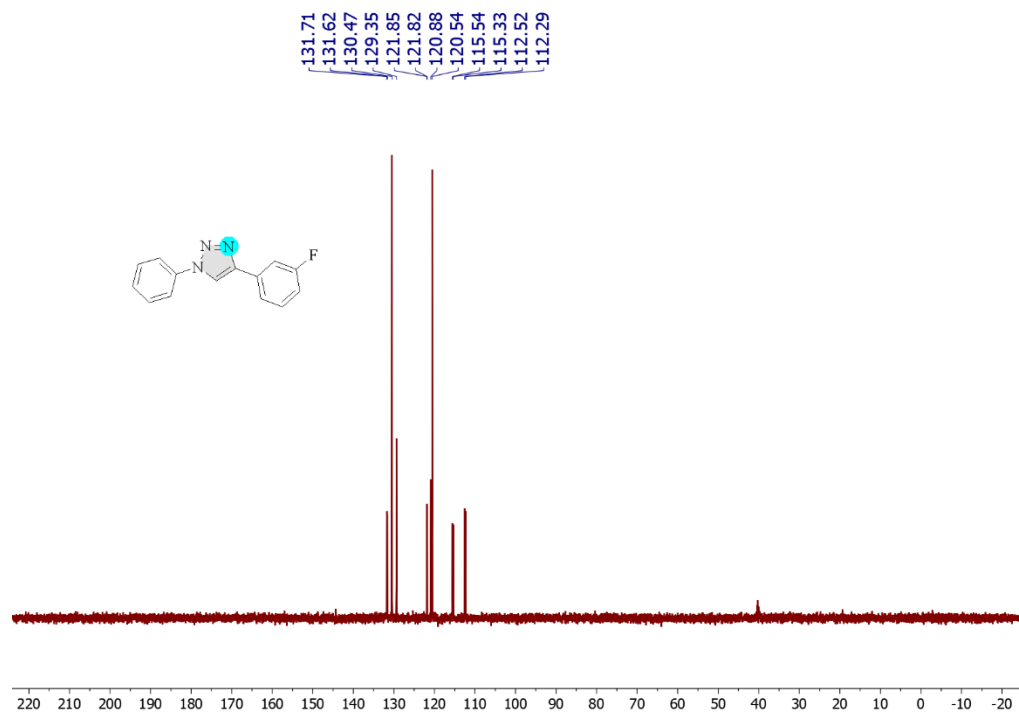

### <sup>19</sup>F-NMR of 4-(3-Fluorophenyl)-1-phenyl-1*H*-1,2,3-triazole (3h)

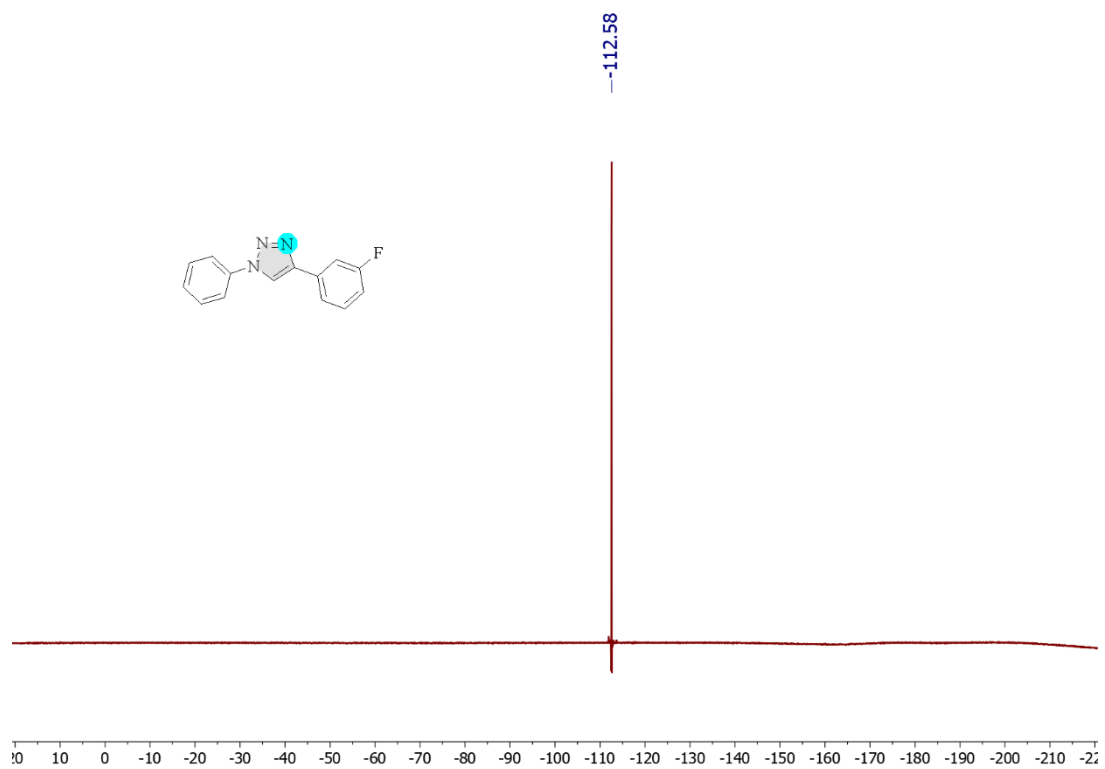

# HRMS of 4-(3-Fluorophenyl)-1-phenyl-1H-1,2,3-triazole (3h)

## Elemental Composition Report

Page 1

### Single Mass Analysis

Tolerance = 50.0 PPM / DBE: min = -1.5, max = 50.0

Element prediction: Off

Number of isotope peaks used for i-FIT = 3

Monoisotopic Mass, Even Electron Ions

20 formula(e) evaluated with 1 results within limits (up to 3 closest results for each mass)

Elements Used:

C: 0-14 H: 0-100 N: 0-3 F: 0-2

MZ-67

QMI DIVISION, CSIR-IIIM JAMMU  
Xevo G2-XS QTOF YFC2015

06-Jul-2022

13:11:09

1: TOF MS ES+

2.29e+007

060722\_07 8 (0.172)

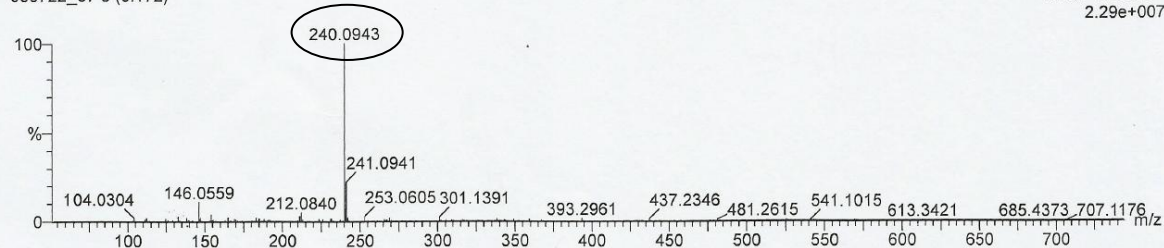

Minimum: -1.5  
Maximum: 2.0 50.0 50.0

| Mass     | Calc. Mass | mDa | PPM | DBE  | i-FIT  | Norm | Conf (%) | Formula      |
|----------|------------|-----|-----|------|--------|------|----------|--------------|
| 240.0943 | 240.0937   | 0.6 | 2.5 | 10.5 | 1170.1 | n/a  | n/a      | C14 H11 N3 F |

### <sup>1</sup>H-NMR of 4-(3,5-Difluorophenyl)-1-phenyl-1H-1,2,3-triazole (3i)

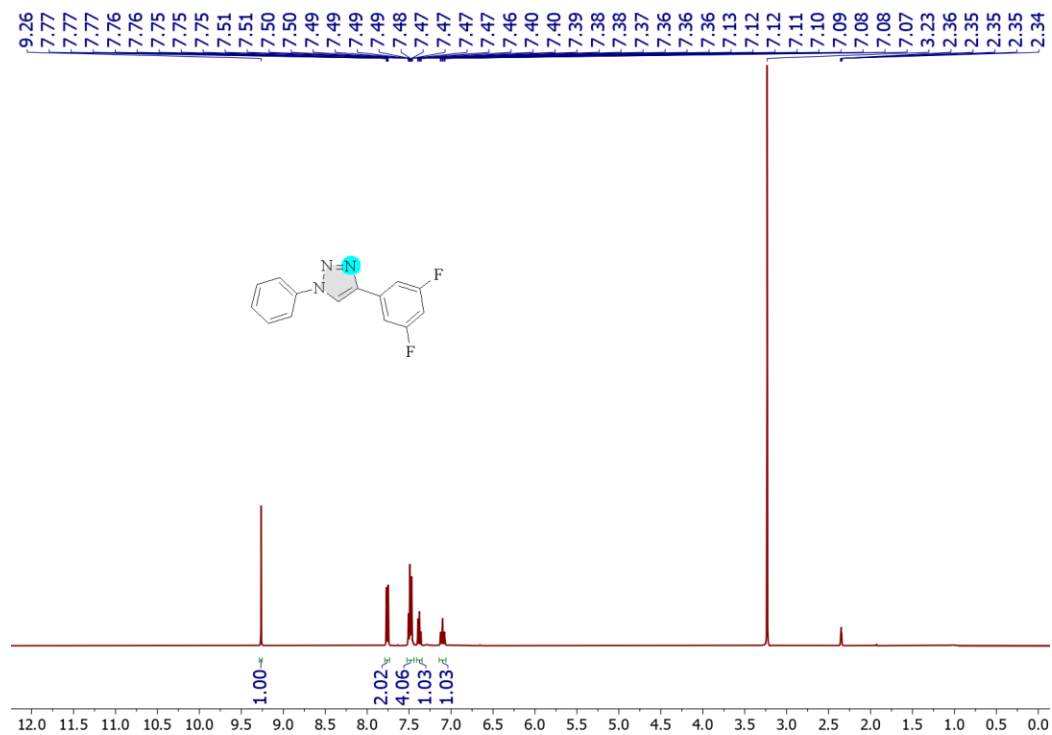

### <sup>13</sup>C-NMR of 4-(3,5-Difluorophenyl)-1-phenyl-1H-1,2,3-triazole (3i)

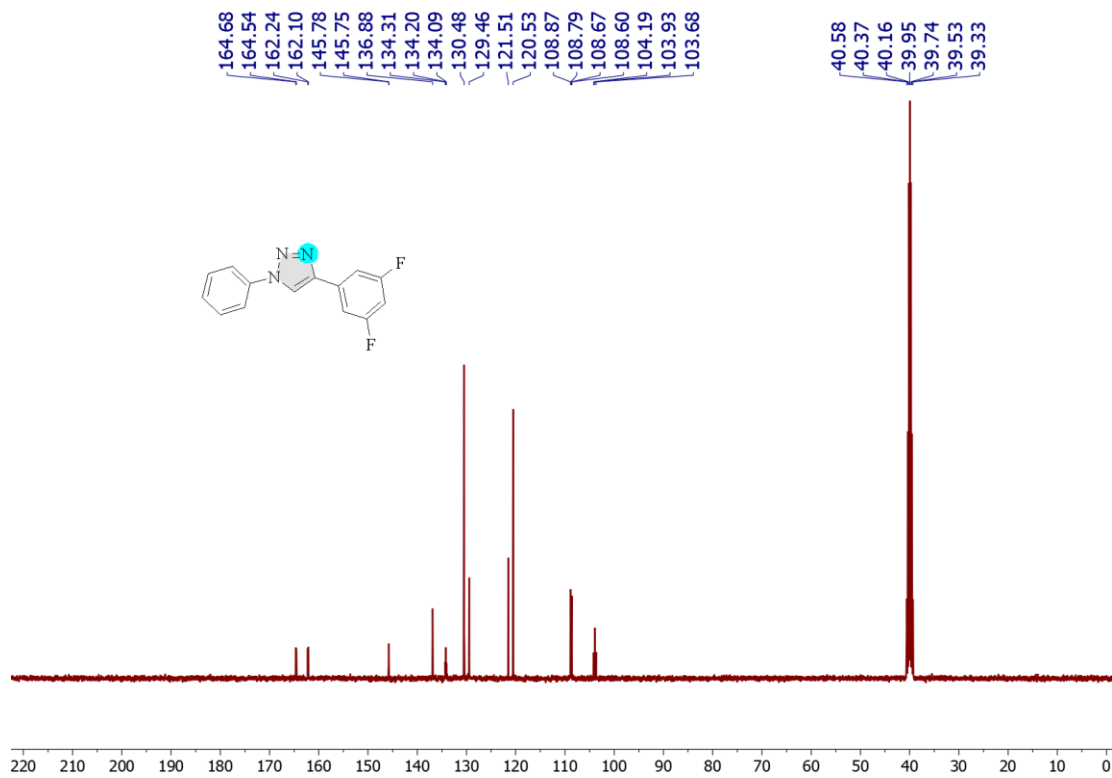

### DEPT of 4-(3,5-Difluorophenyl)-1-phenyl-1H-1,2,3-triazole (3i)

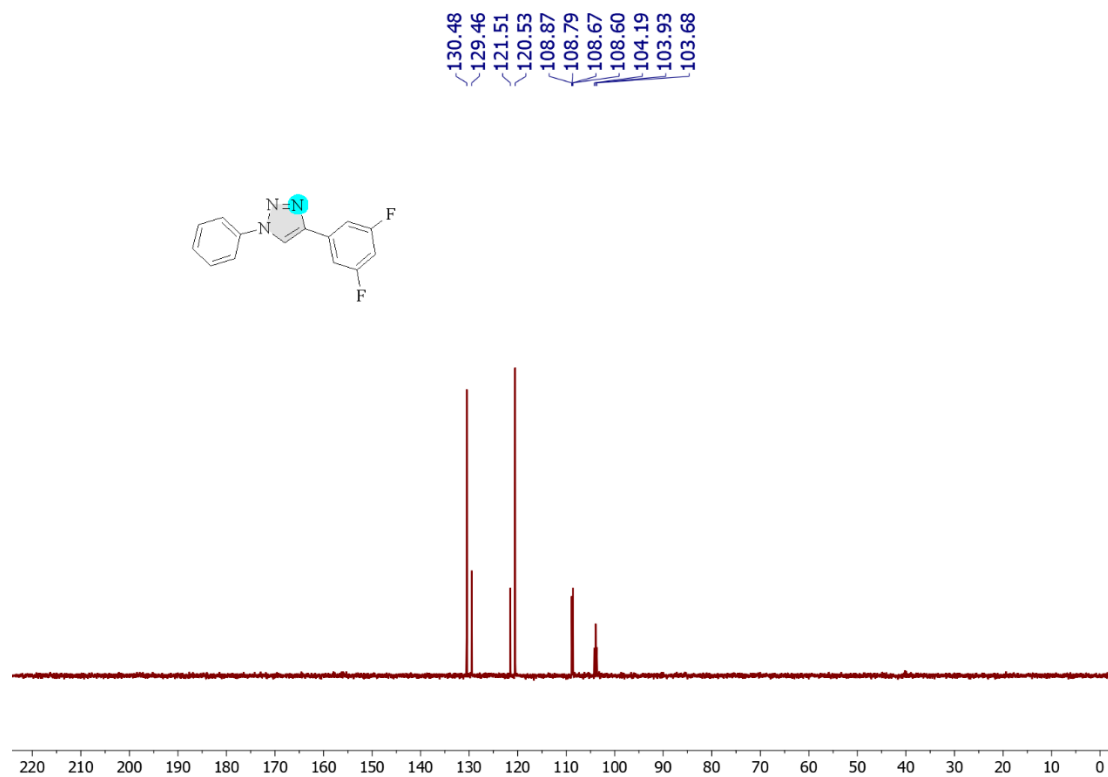

### <sup>19</sup>F-NMR of 4-(3,5-Difluorophenyl)-1-phenyl-1H-1,2,3-triazole (3i)

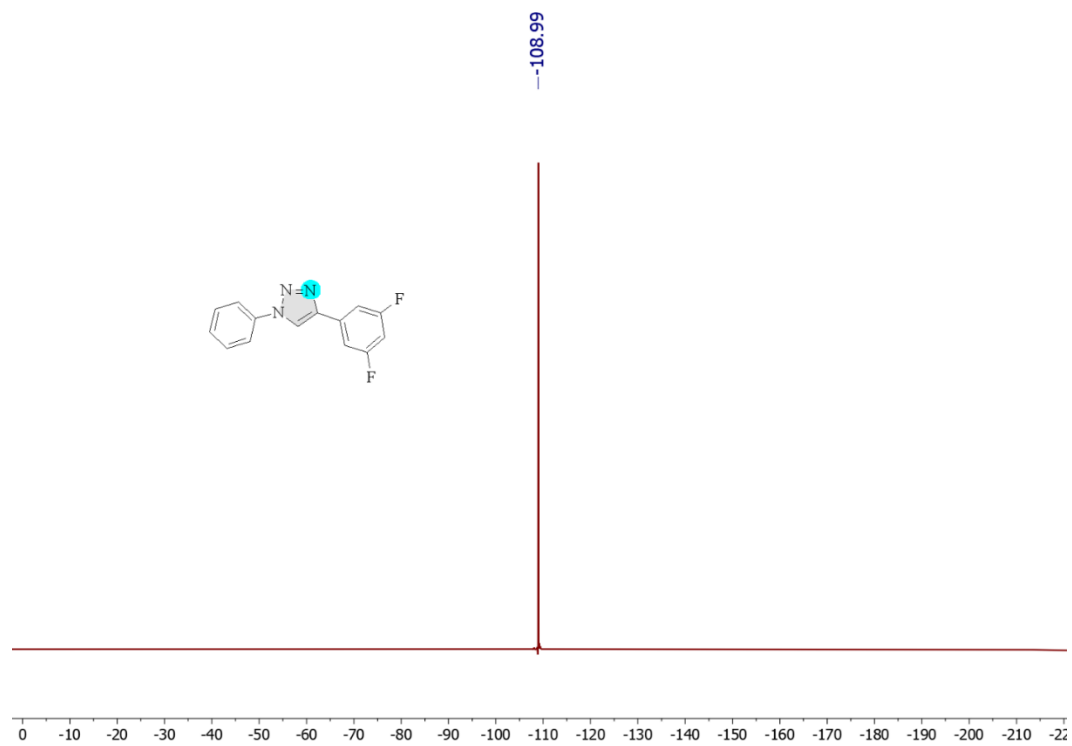

# HRMS of 4-(3,5-Difluorophenyl)-1-phenyl-1H-1,2,3-triazole (3i)

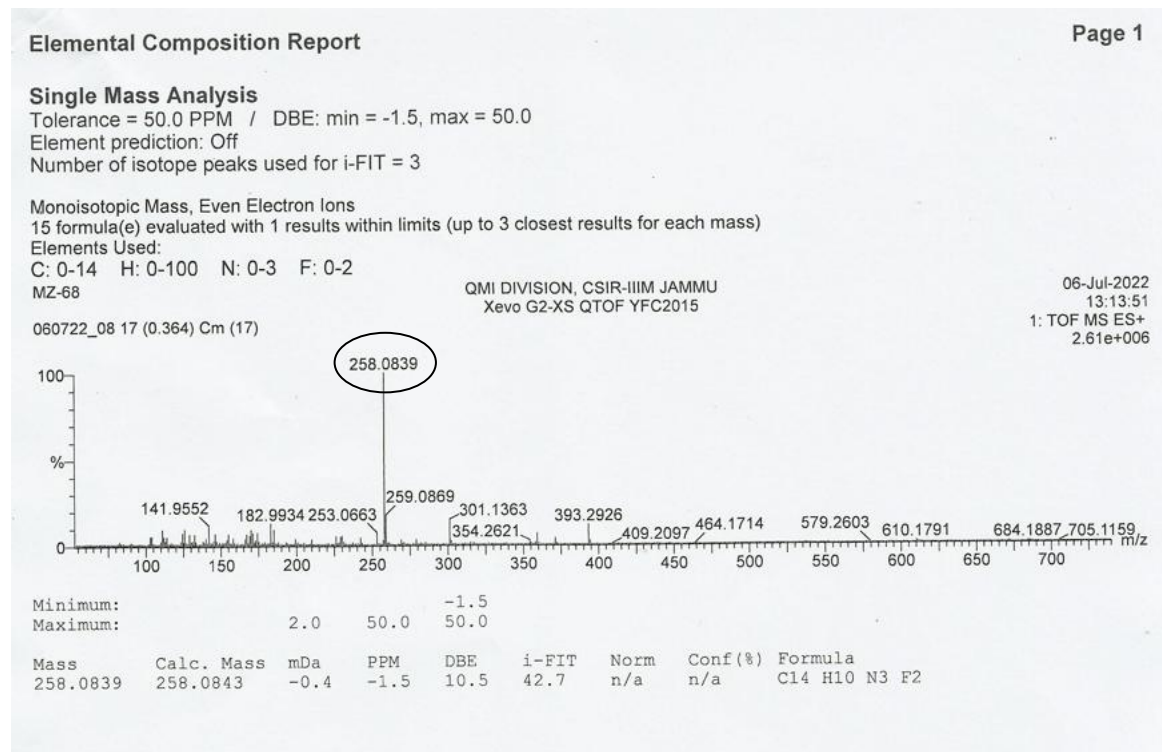

**<sup>1</sup>H-NMR of 4-(3,5-Bis(trifluoromethyl)phenyl)-1-phenyl-1H-1,2,3-triazole (3j)**

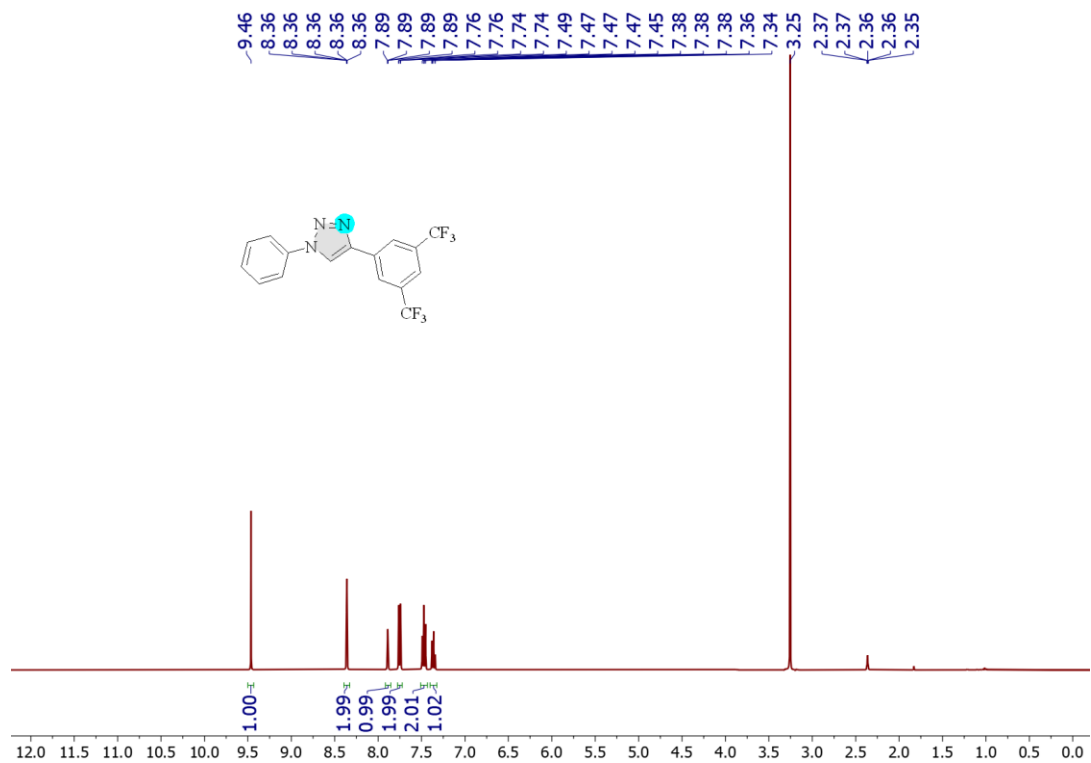

**<sup>13</sup>C-NMR of 4-(3,5-Bis(trifluoromethyl)phenyl)-1-phenyl-1H-1,2,3-triazole (3j)**

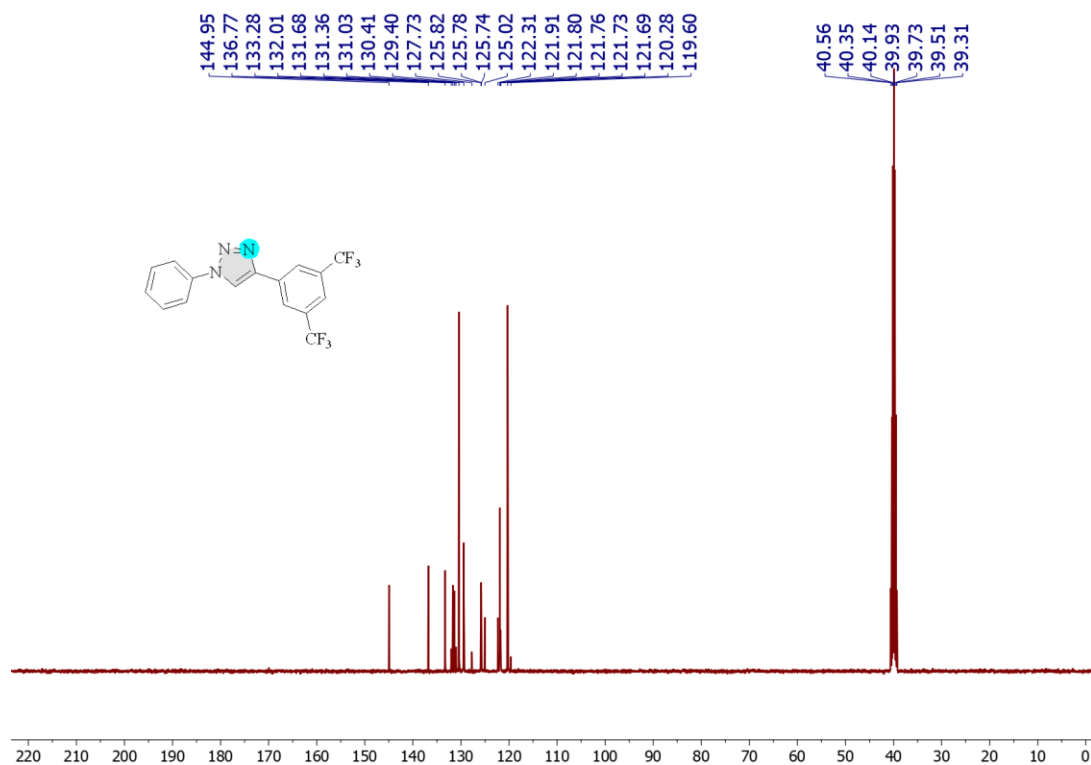

### DEPT of 4-(3,5-Bis(trifluoromethyl)phenyl)-1-phenyl-1H-1,2,3-triazole (3j)

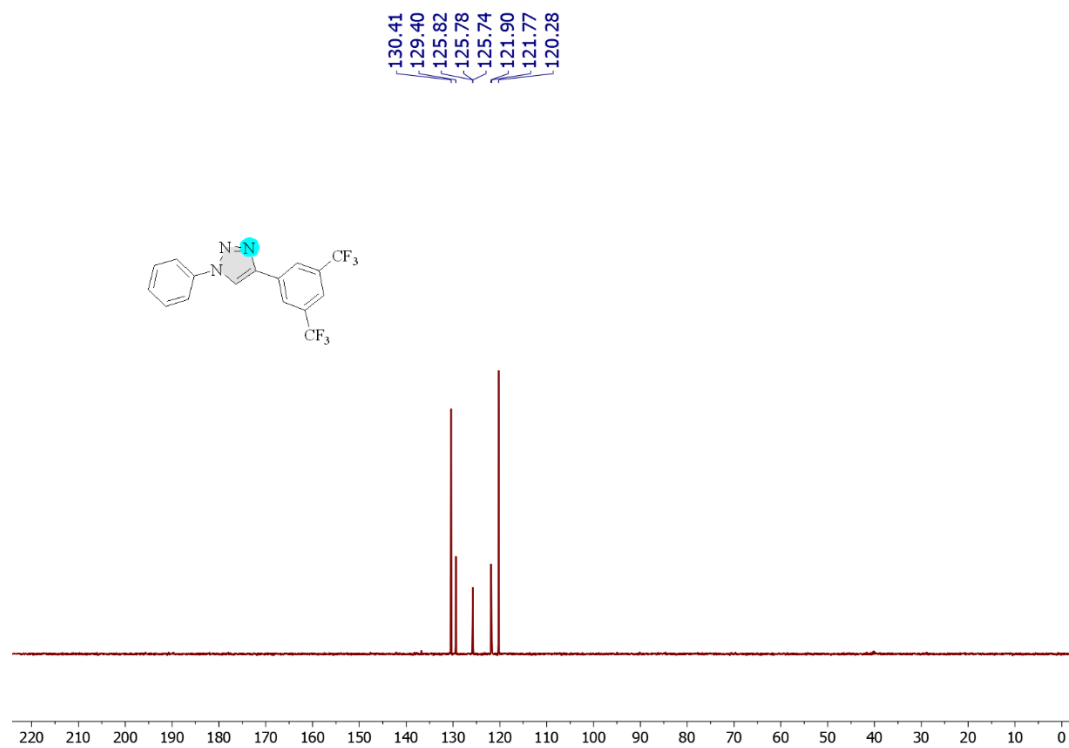

### <sup>19</sup>F-NMR of 4-(3,5-Bis(trifluoromethyl)phenyl)-1-phenyl-1H-1,2,3-triazole (3j)

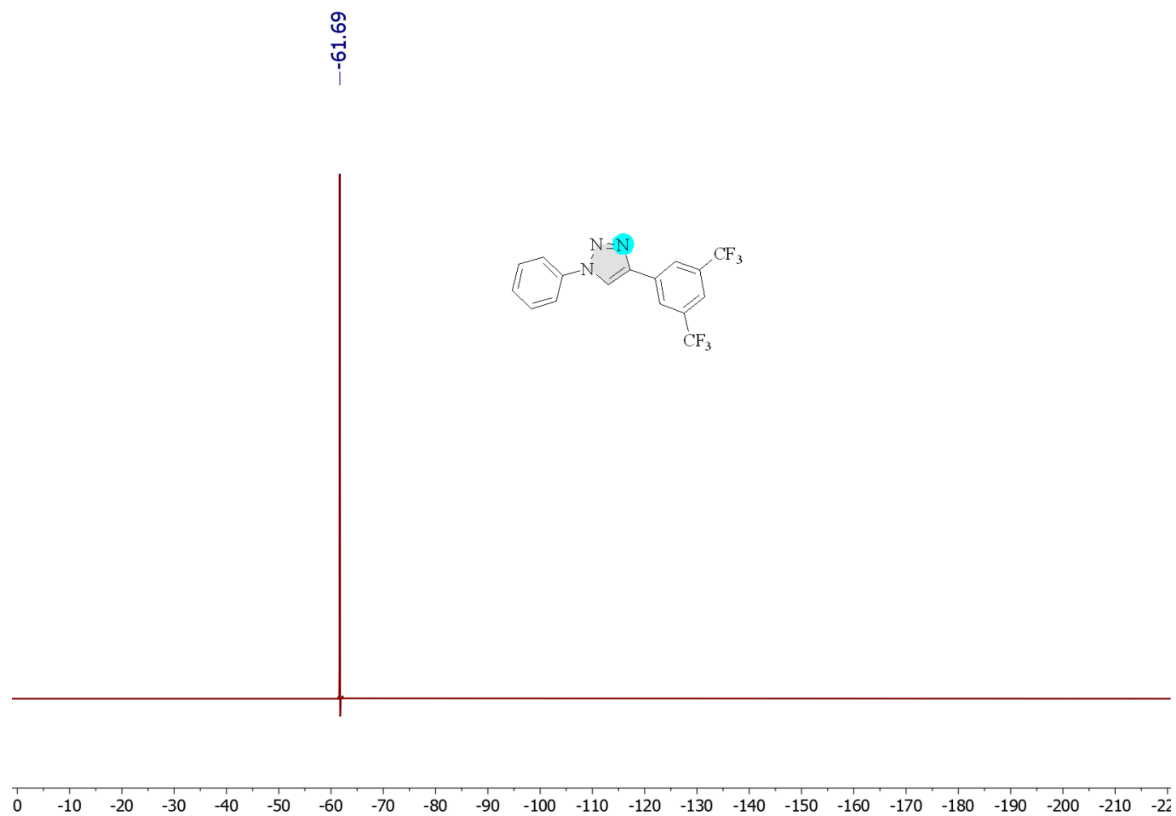

# HRMS of 4-(3,5-Bis(trifluoromethyl)phenyl)-1-phenyl-1H-1,2,3-triazole (3j)

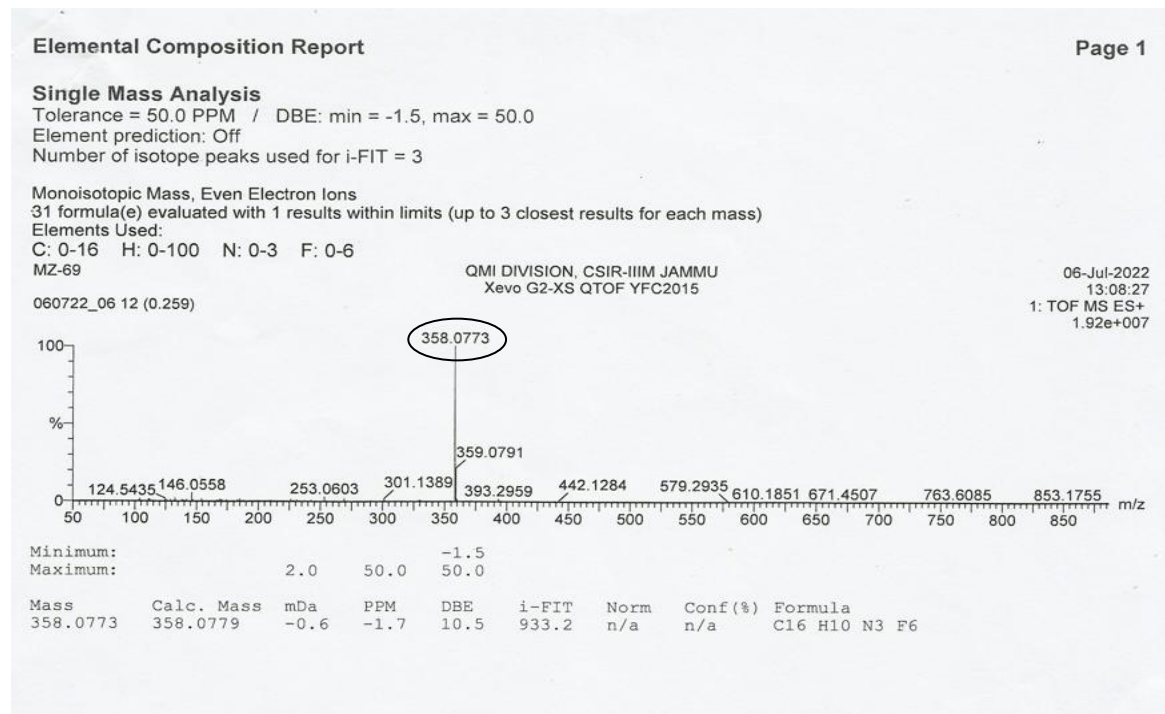

### <sup>1</sup>H-NMR of 1-(4-Methoxyphenyl)-4-phenyl-1H-1,2,3-triazole (3k)

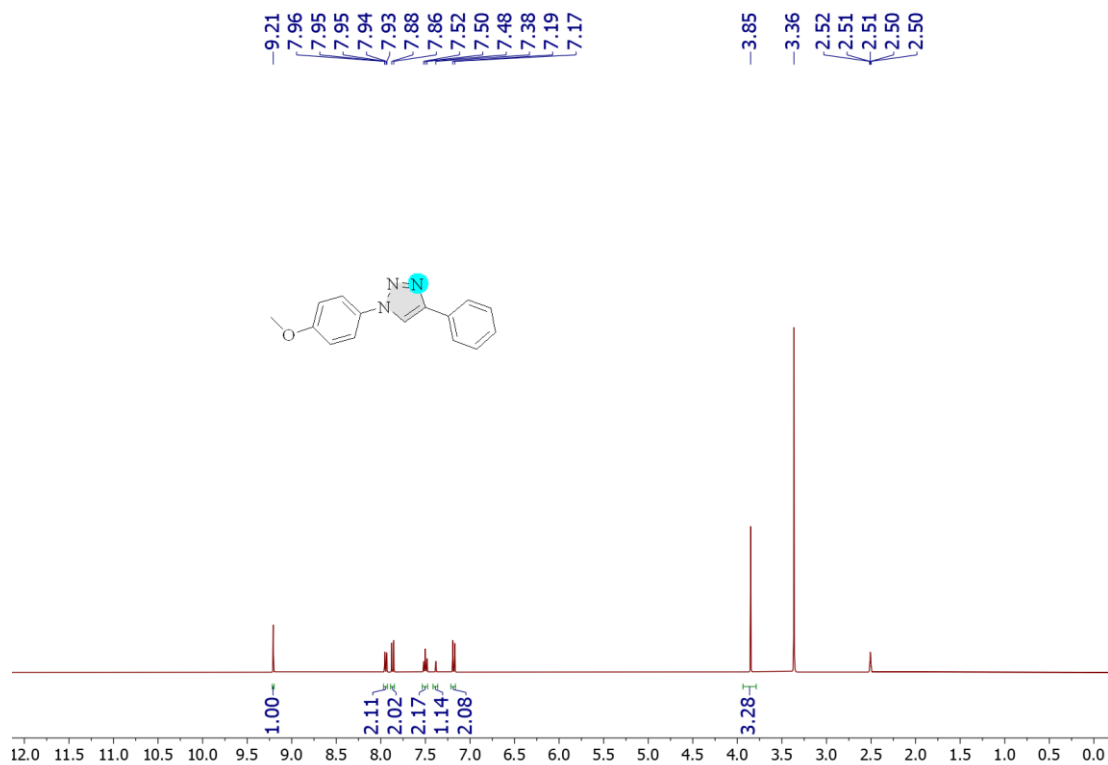

### <sup>13</sup>C-NMR of 1-(4-Methoxyphenyl)-4-phenyl-1H-1,2,3-triazole (3k)

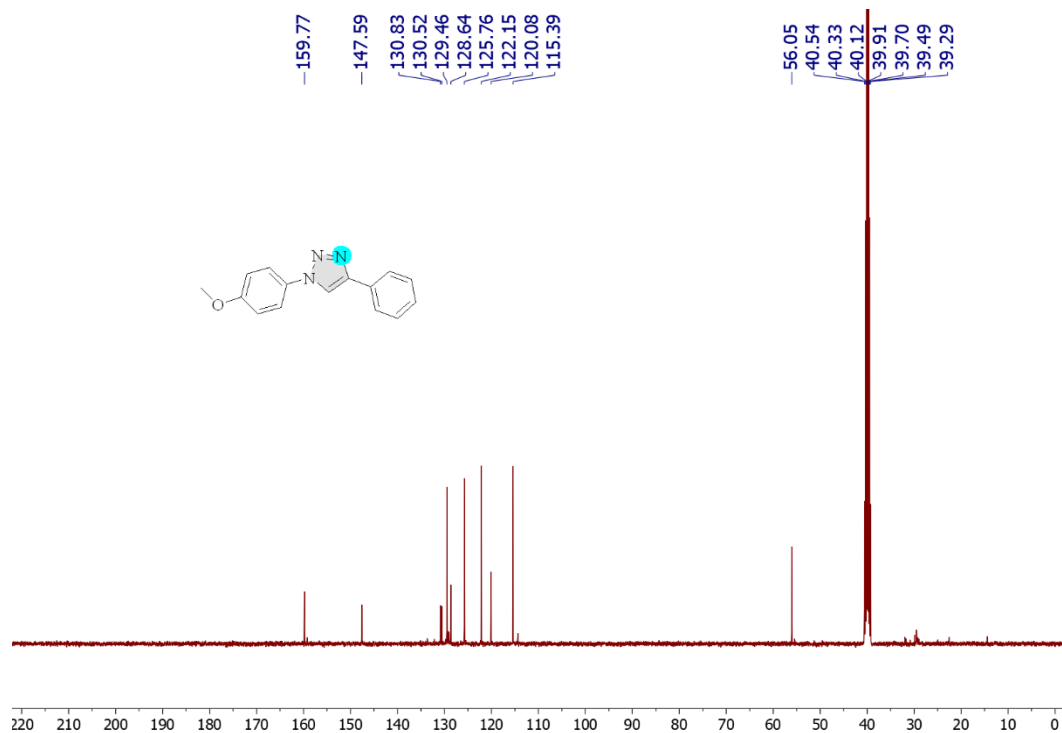

## DEPT of 1-(4-Methoxyphenyl)-4-phenyl-1*H*-1,2,3-triazole (3k)

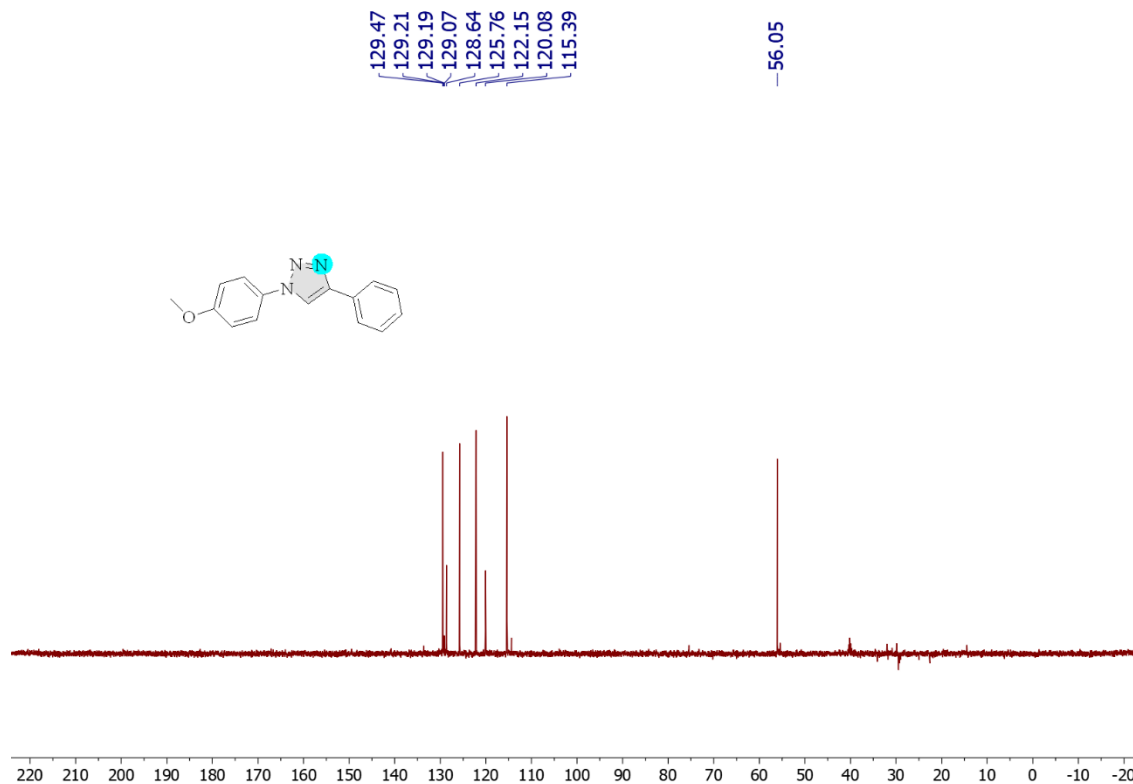

## HRMS of 1-(4-Methoxyphenyl)-4-phenyl-1*H*-1,2,3-triazole (3k)

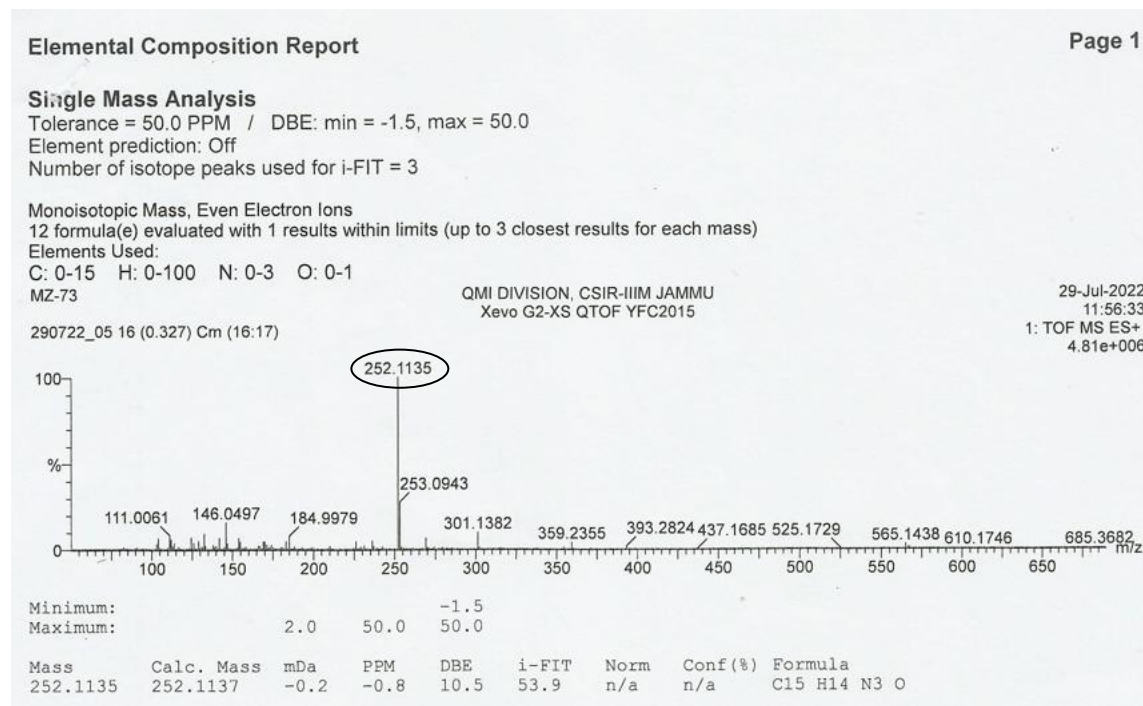

### <sup>1</sup>H-NMR of 1-(4-Methoxyphenyl)-4-(*p*-tolyl)-1*H*-1,2,3-triazole (3I)

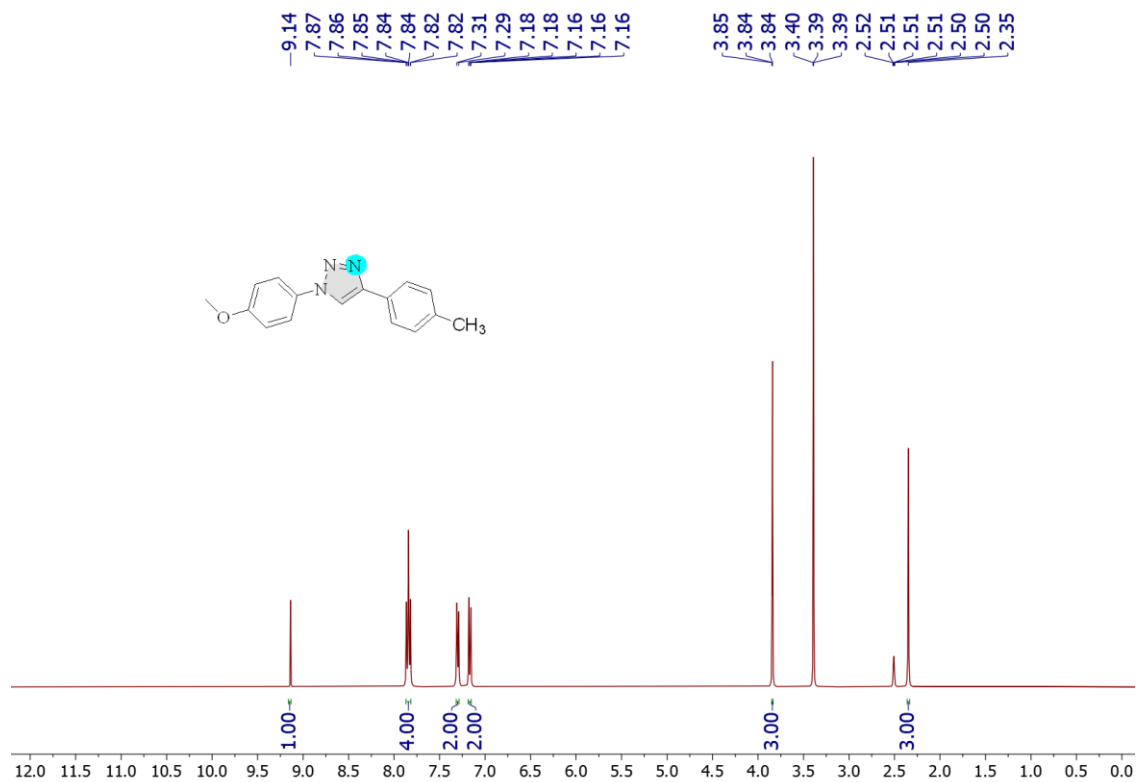

### <sup>13</sup>C-NMR of 1-(4-Methoxyphenyl)-4-(*p*-tolyl)-1*H*-1,2,3-triazole (3I)

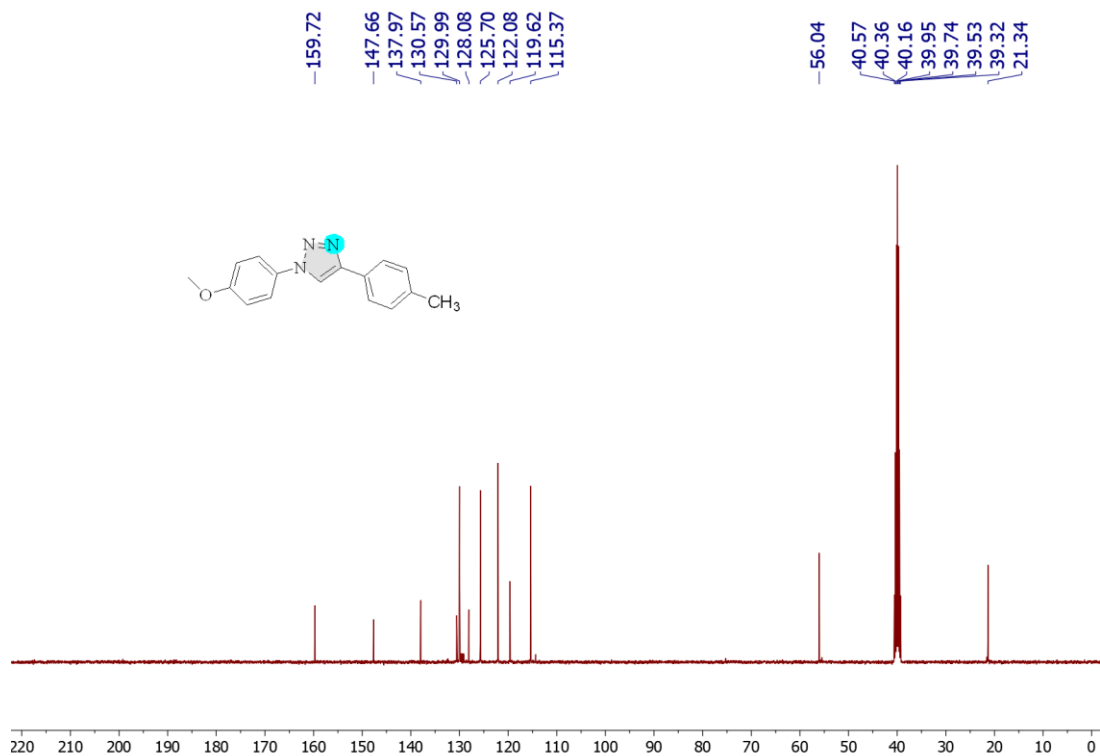

## DEPT of 1-(4-Methoxyphenyl)-4-(*p*-tolyl)-1*H*-1,2,3-triazole (3l)

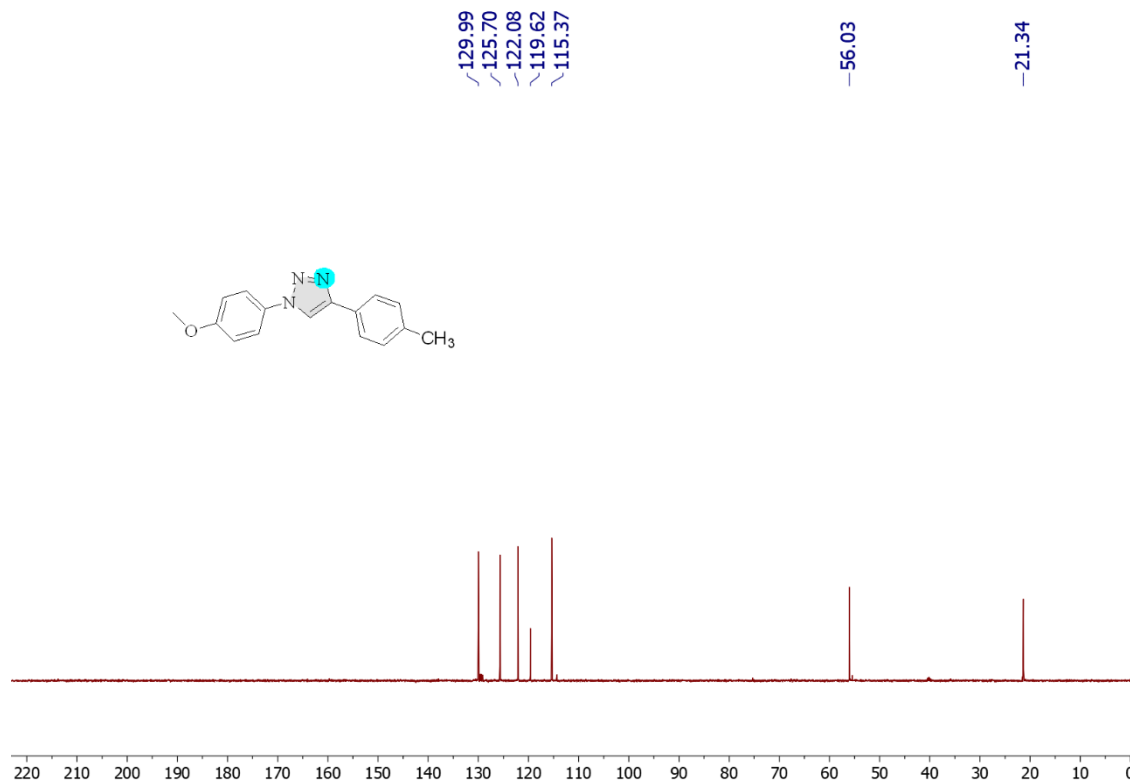

## HRMS of 1-(4-Methoxyphenyl)-4-(*p*-tolyl)-1*H*-1,2,3-triazole (3l)

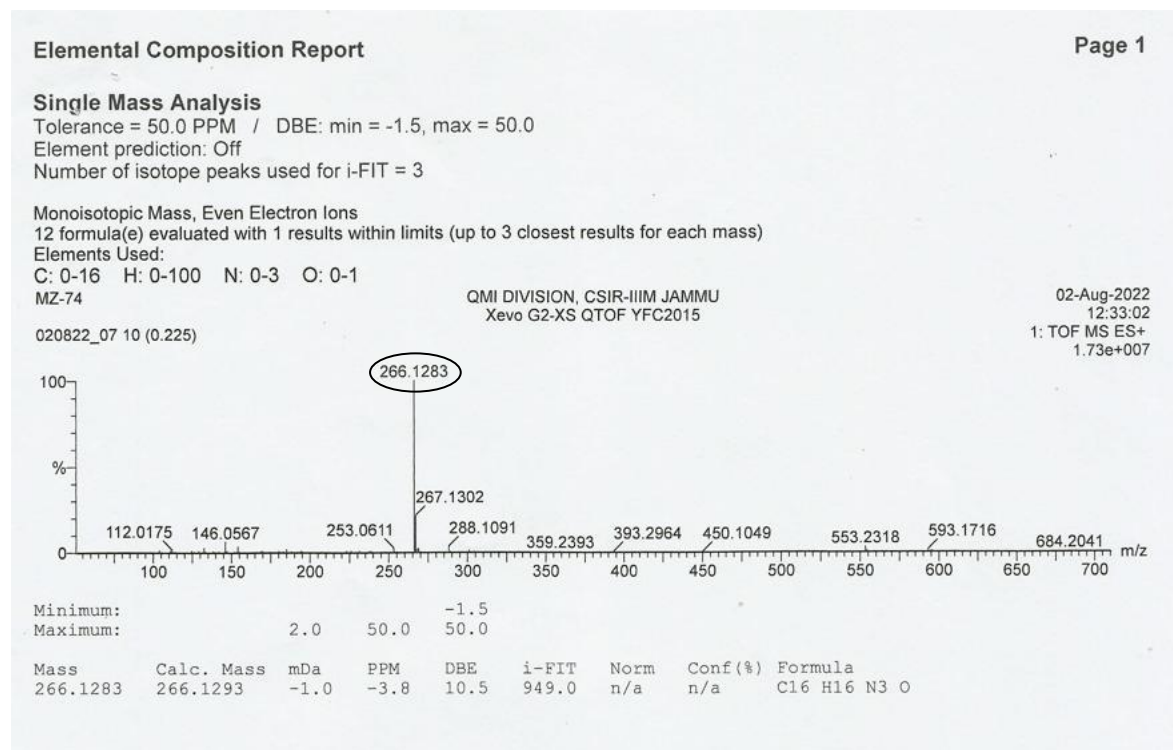

### <sup>1</sup>H-NMR of 4-(4-Ethylphenyl)-1-(4-methoxyphenyl)-1H-1,2,3-triazole (3m)

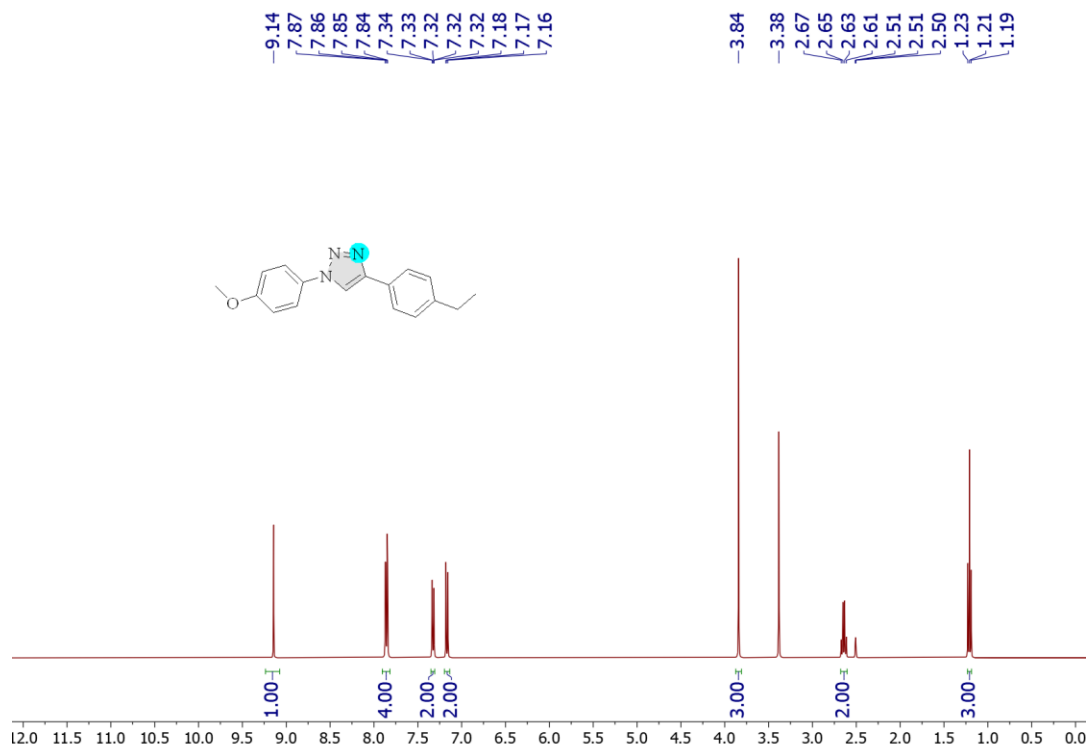

### <sup>13</sup>C-NMR of 4-(4-Ethylphenyl)-1-(4-methoxyphenyl)-1H-1,2,3-triazole (3m)

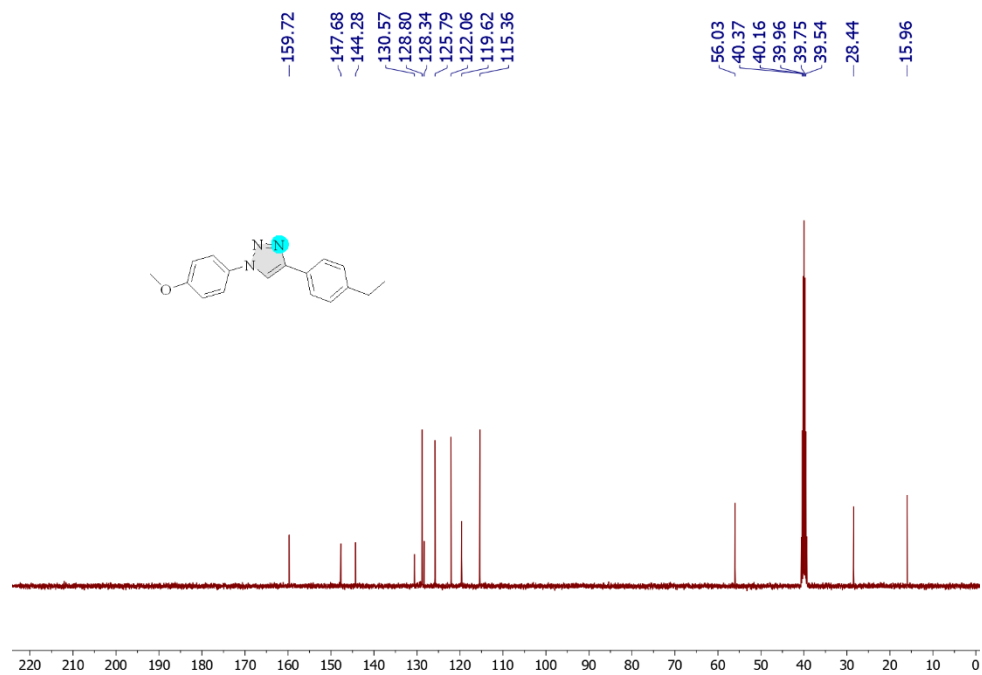

### DEPT of 4-(4-Ethylphenyl)-1-(4-methoxyphenyl)-1H-1,2,3-triazole (3m)

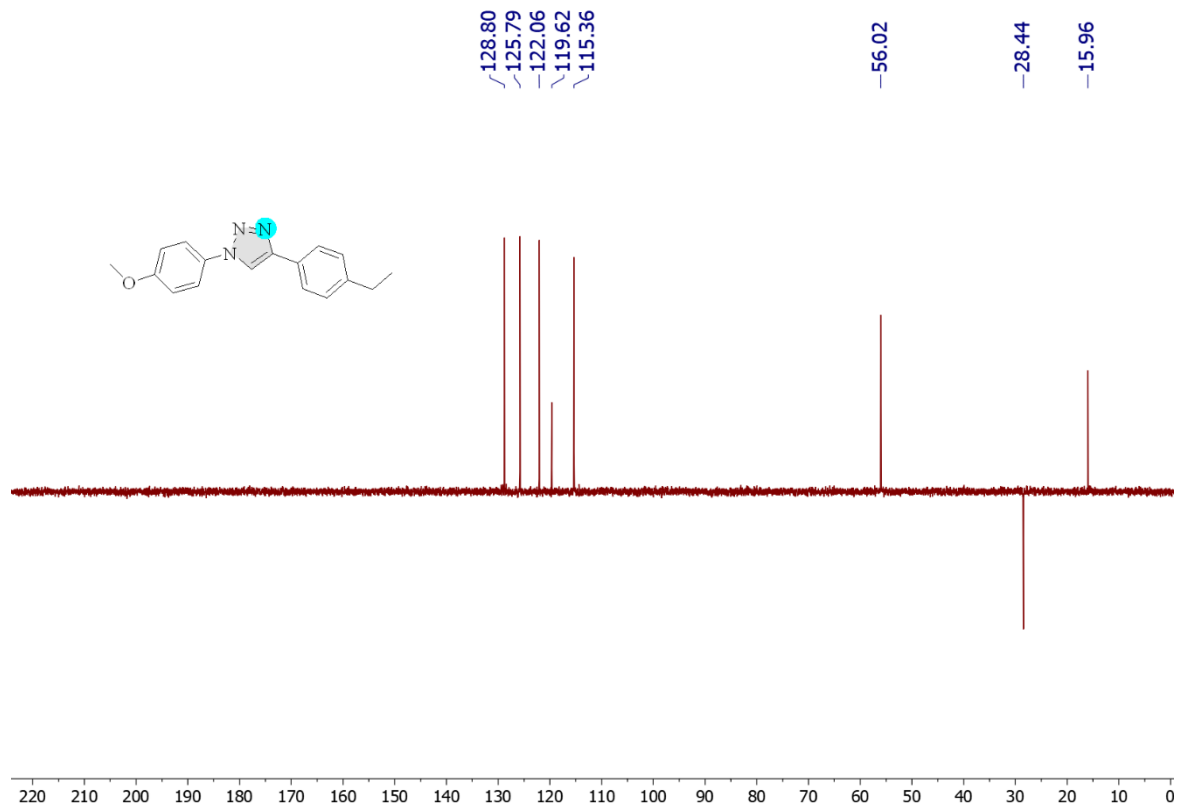

### HRMS of 4-(4-Ethylphenyl)-1-(4-methoxyphenyl)-1H-1,2,3-triazole (3m)

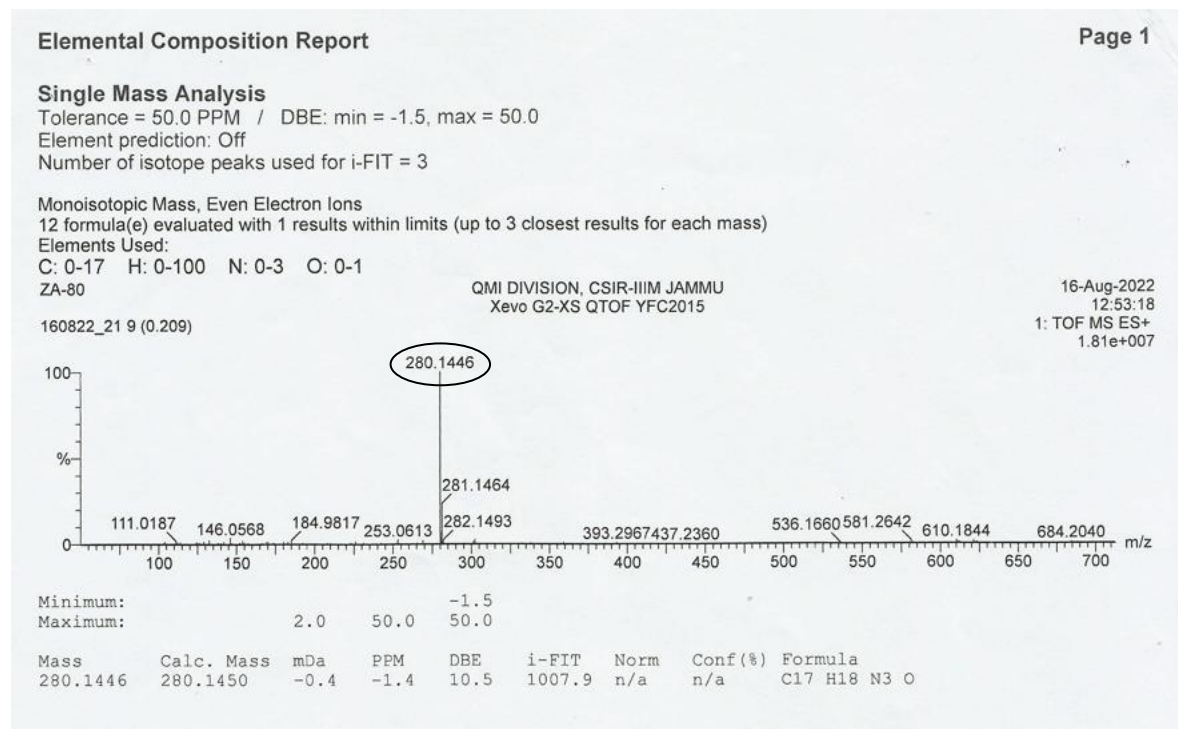

### <sup>1</sup>H-NMR of 4-(4-Butylphenyl)-1-(4-methoxyphenyl)-4,5-dihydro-1H-1,2,3-triazole (3n)

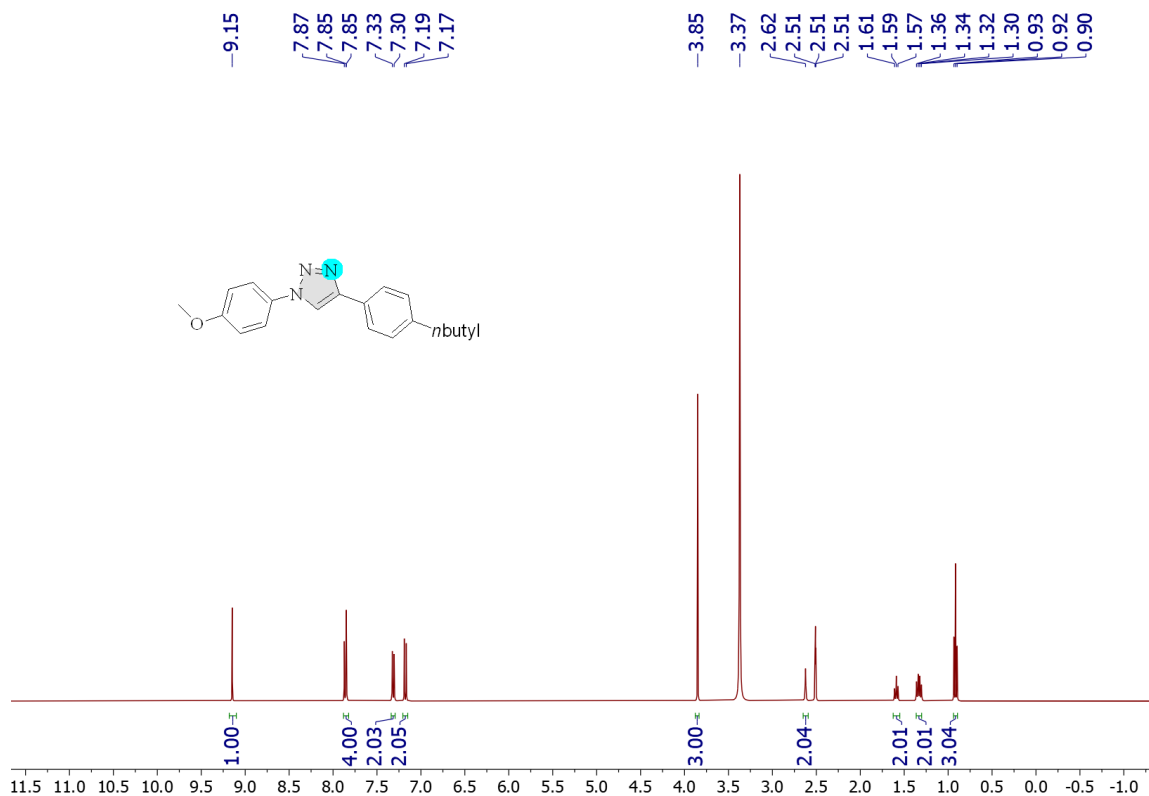

### <sup>13</sup>C-NMR of 4-(4-Butylphenyl)-1-(4-methoxyphenyl)-4,5-dihydro-1H-1,2,3-triazole (3n)

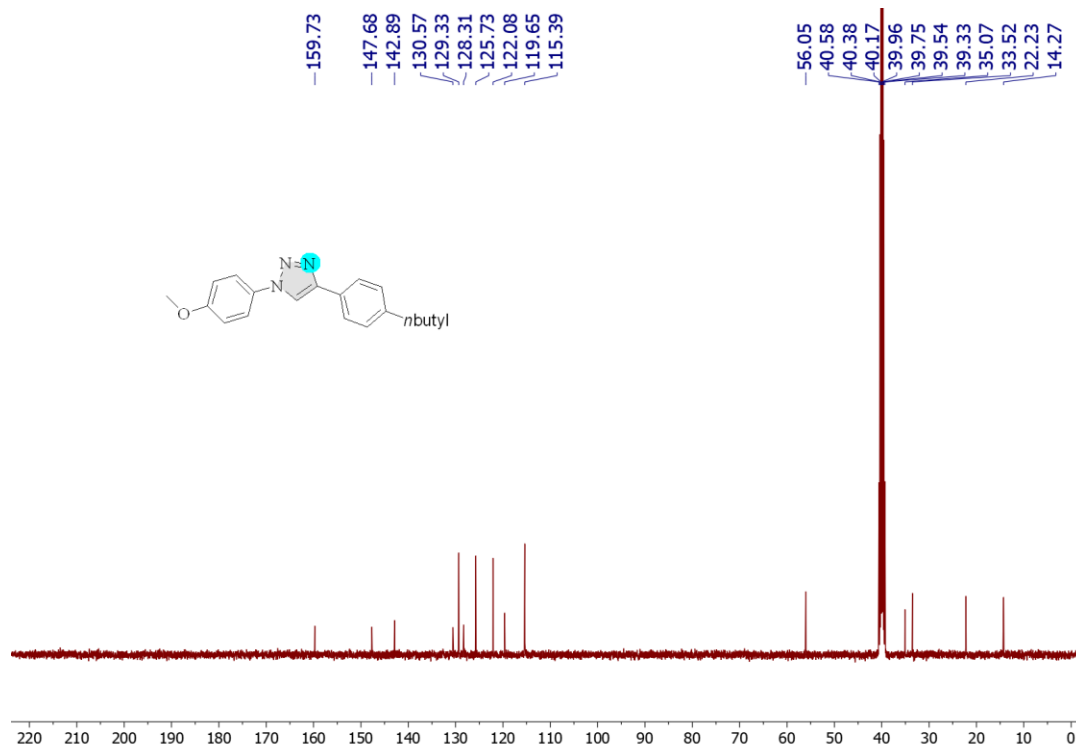

**DEPT of 4-(4-Butylphenyl)-1-(4-methoxyphenyl)-4,5-dihydro-1H-1,2,3-triazole (3n)**

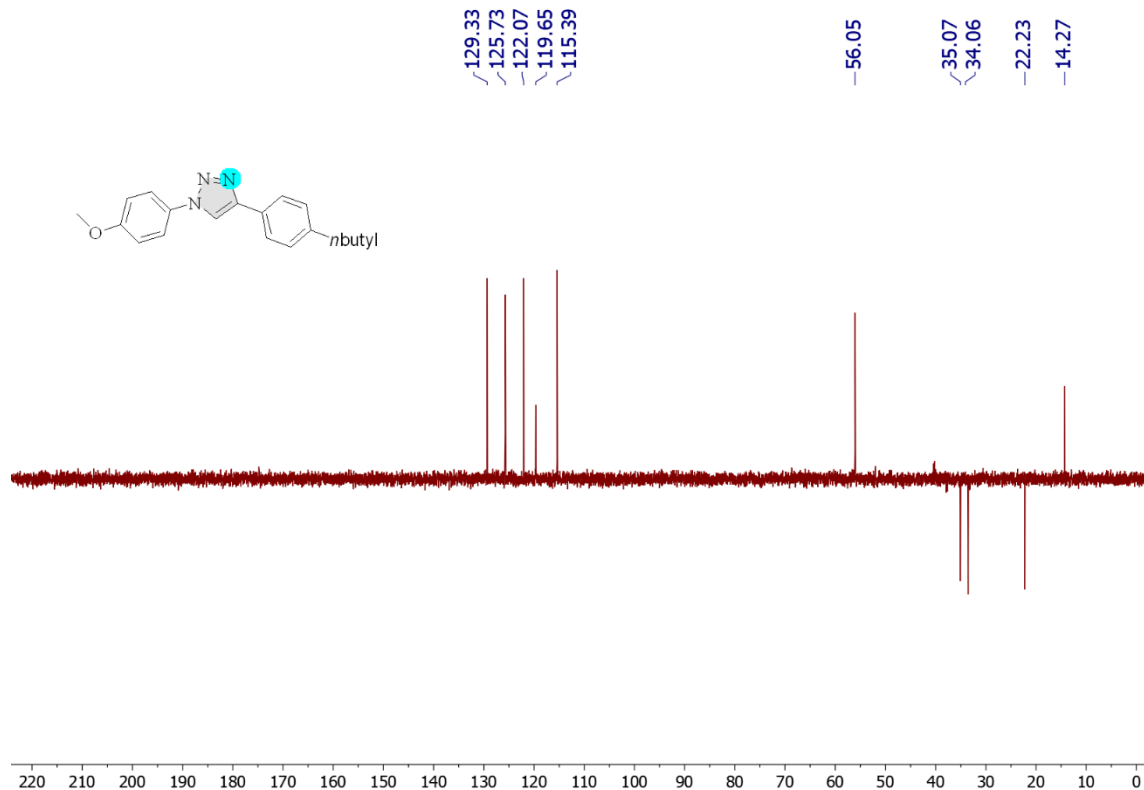

**HRMS of 4-(4-Butylphenyl)-1-(4-methoxyphenyl)-4,5-dihydro-1H-1,2,3-triazole (3n)**

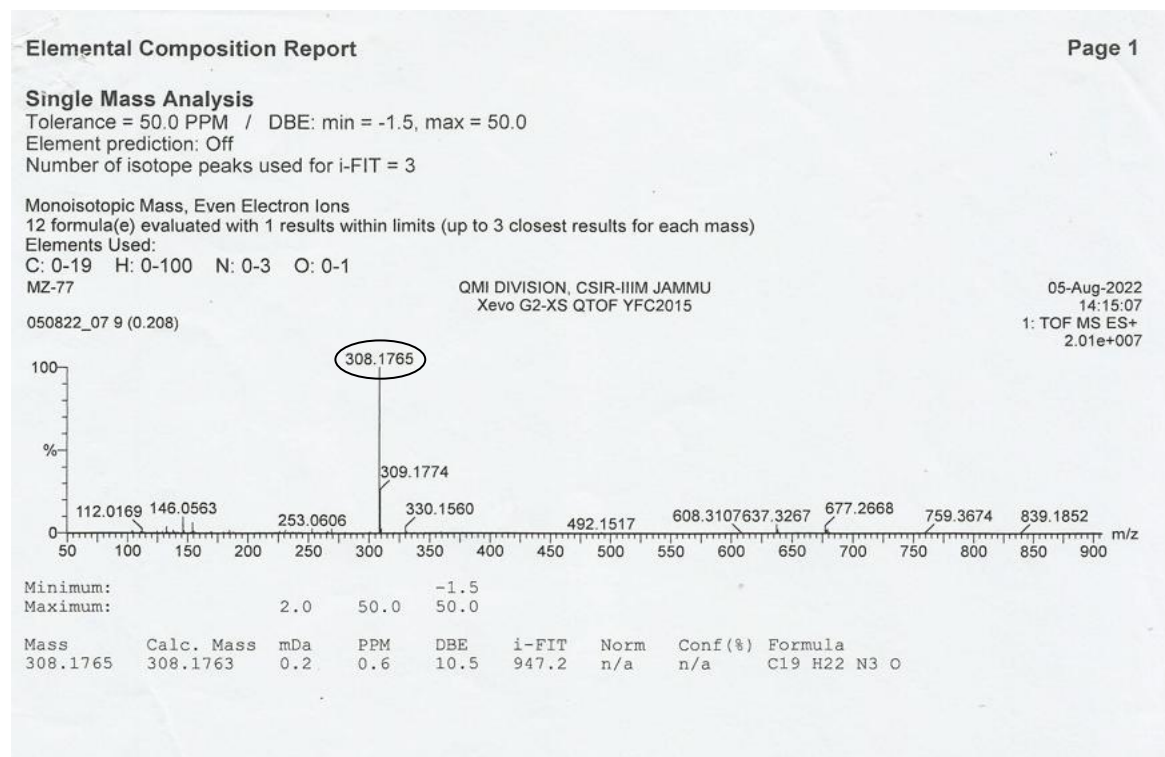

### <sup>1</sup>H-NMR of 1,4-Bis(4-methoxyphenyl)-1H-1,2,3-triazole (3o)

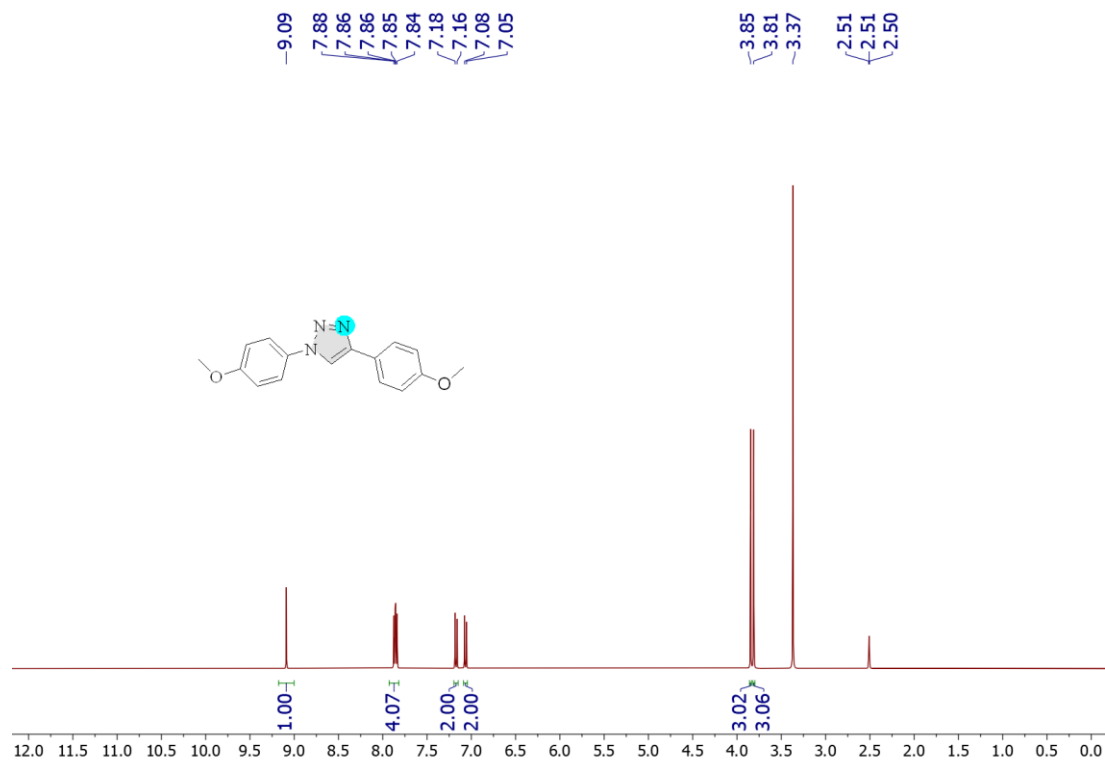

### <sup>13</sup>C-NMR of 1,4-Bis(4-methoxyphenyl)-1H-1,2,3-triazole (3o)

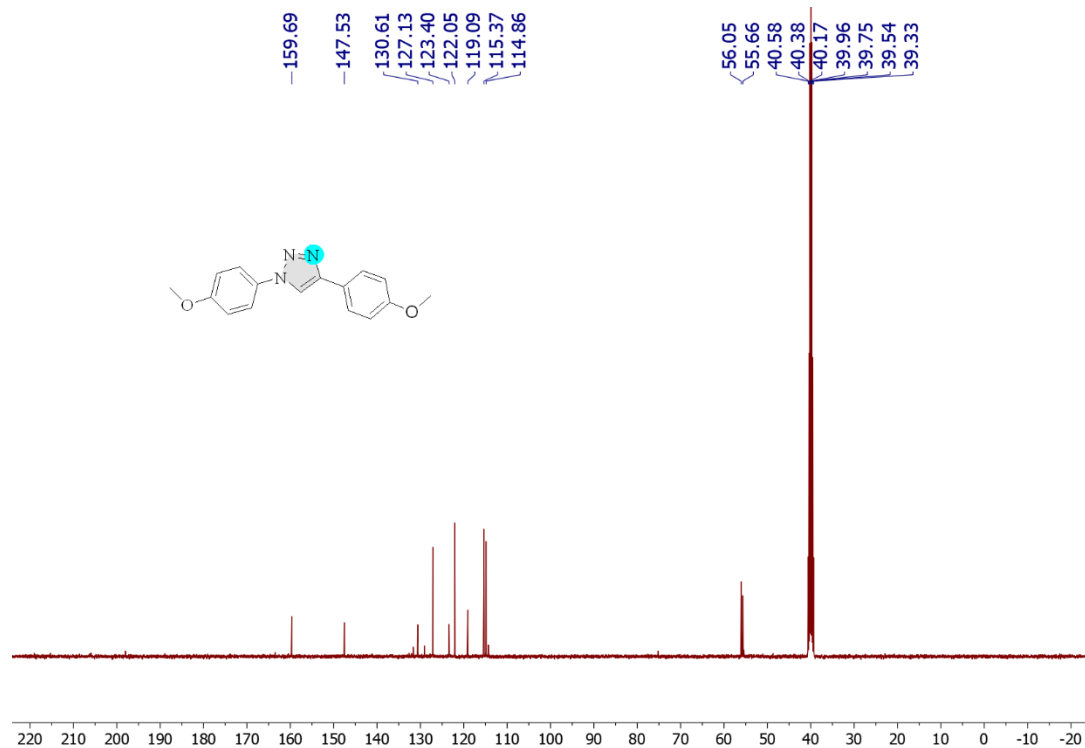

### DEPT of 1,4-Bis(4-methoxyphenyl)-1H-1,2,3-triazole (3o)

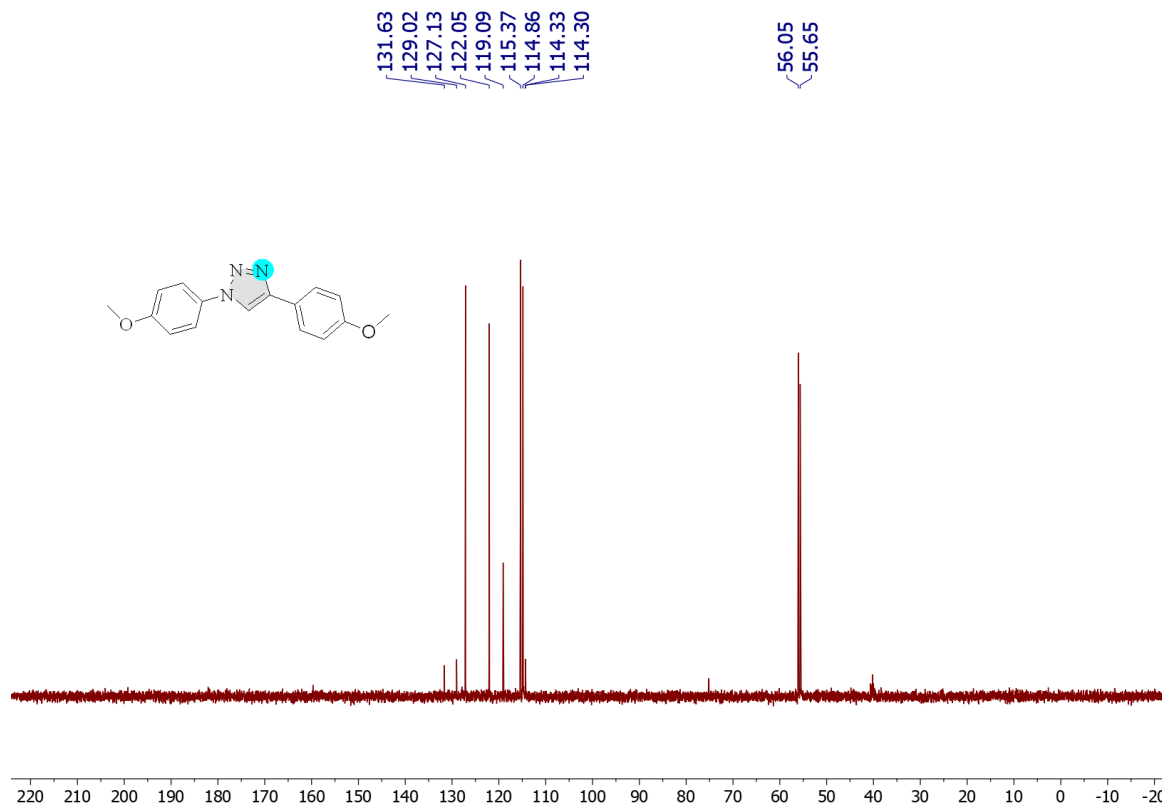

### HRMS of 1,4-Bis(4-methoxyphenyl)-1H-1,2,3-triazole (3o)

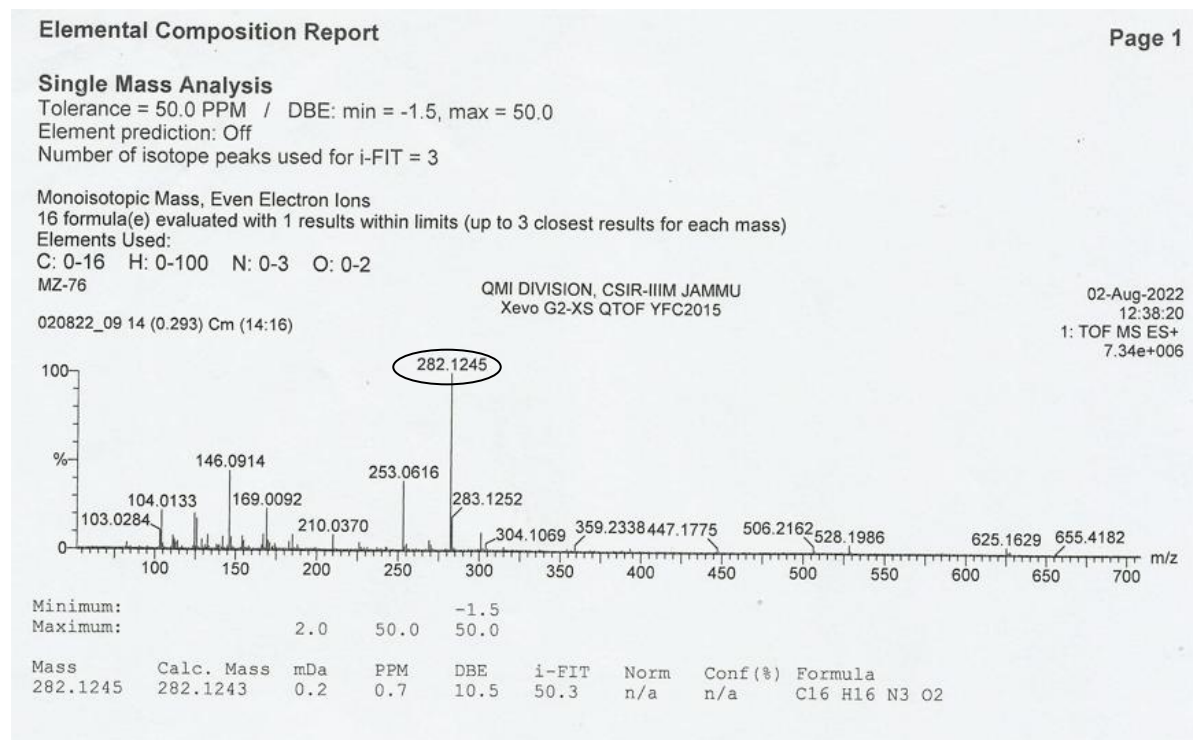

### <sup>1</sup>H-NMR of 4-(4-Fluorophenyl)-1-(4-methoxyphenyl)-1H-1,2,3-triazole (3p)

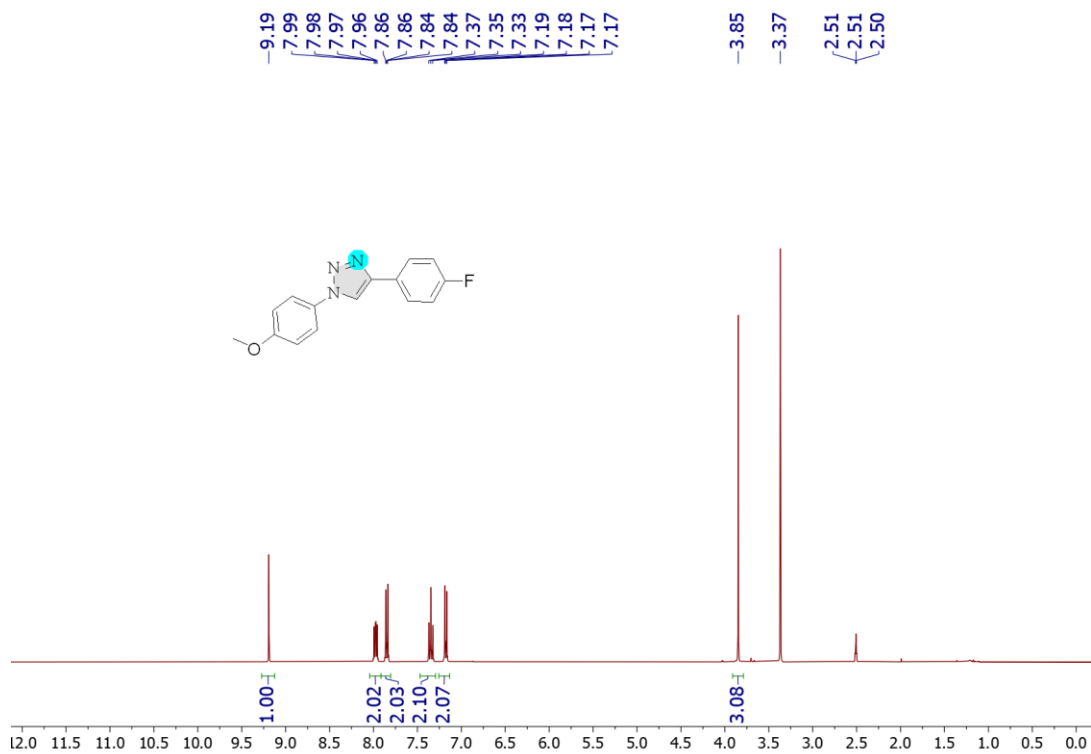

### <sup>13</sup>C-NMR of 4-(4-Fluorophenyl)-1-(4-methoxyphenyl)-1H-1,2,3-triazole (3p)

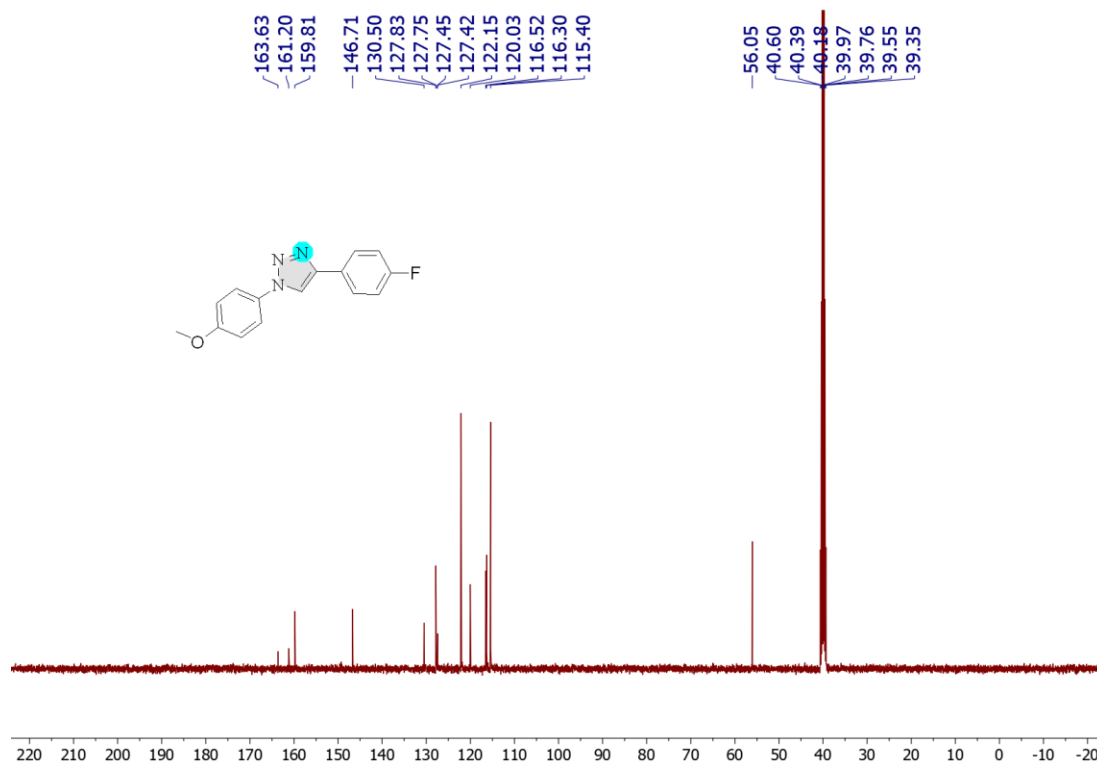

**DEPT of 4-(4-Fluorophenyl)-1-(4-methoxyphenyl)-1*H*-1,2,3-triazole (3p)**

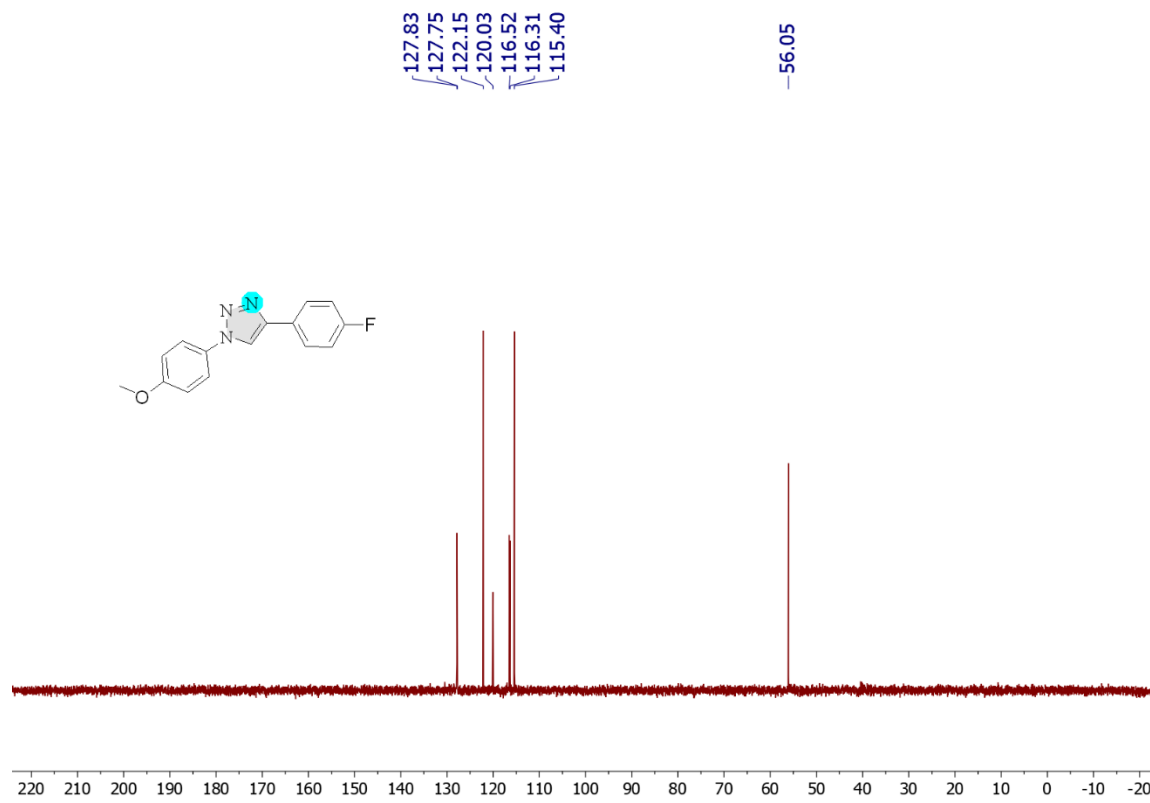

**<sup>19</sup>F-NMR of 4-(4-Fluorophenyl)-1-(4-methoxyphenyl)-1*H*-1,2,3-triazole (3p)**

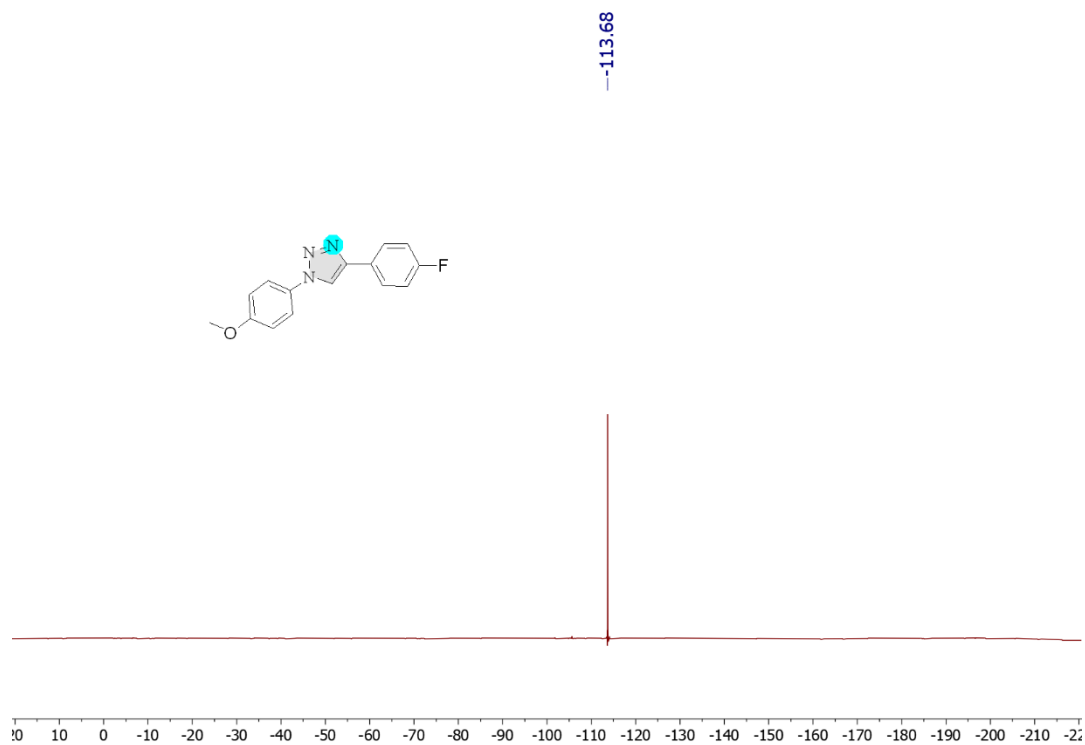

# HRMS of 4-(4-Fluorophenyl)-1-(4-methoxyphenyl)-1H-1,2,3-triazole (3p)

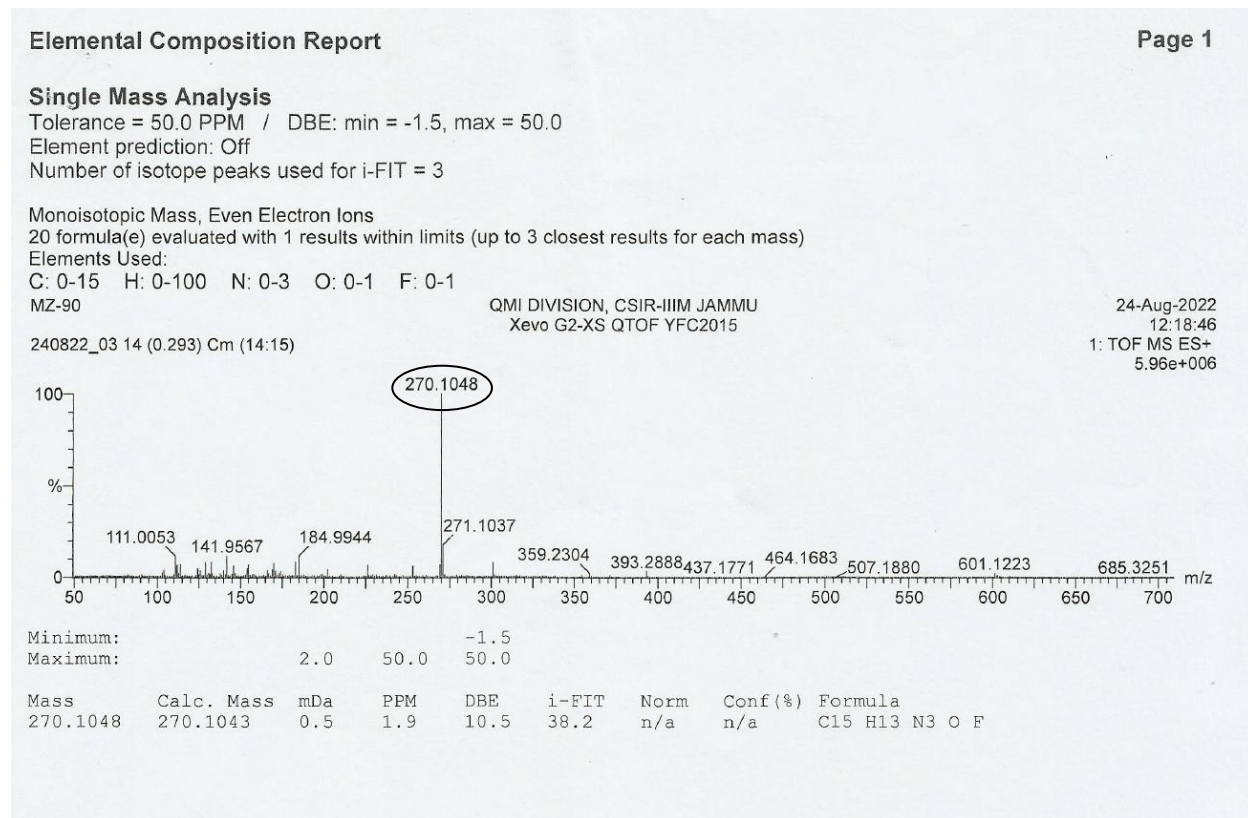

# <sup>1</sup>H-NMR of 4-(4-Bromophenyl)-1-(4-methoxyphenyl)-1H-1,2,3-triazole (3q)

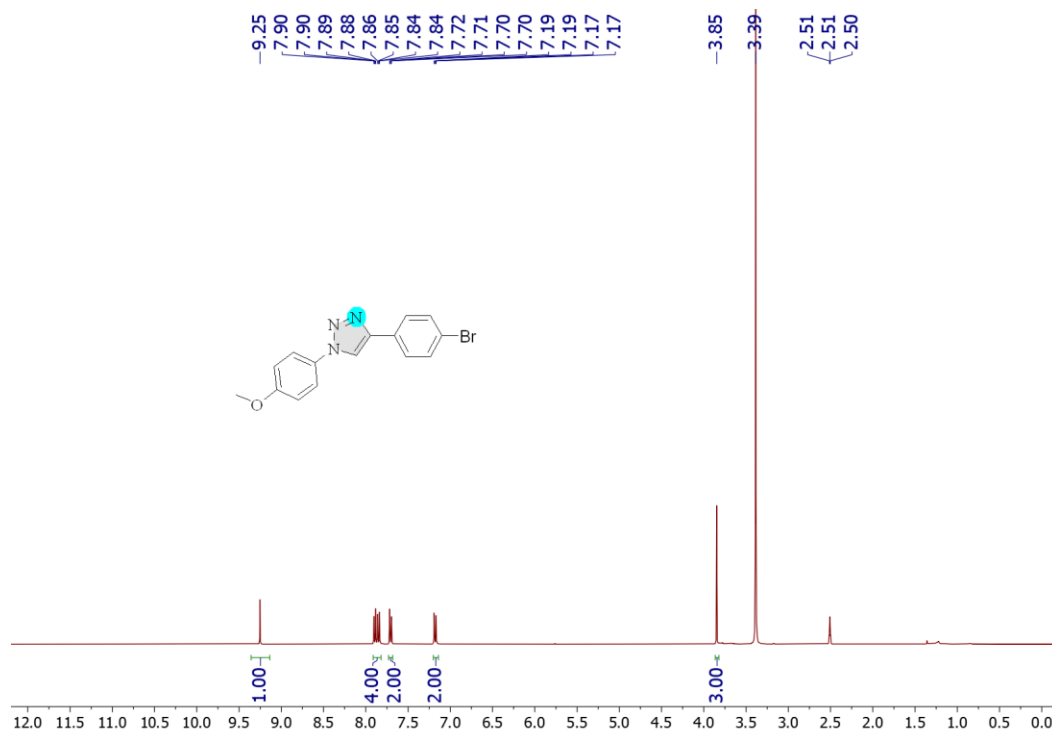

### <sup>13</sup>C-NMR of 4-(4-Bromophenyl)-1-(4-methoxyphenyl)-1H-1,2,3-triazole (3q)

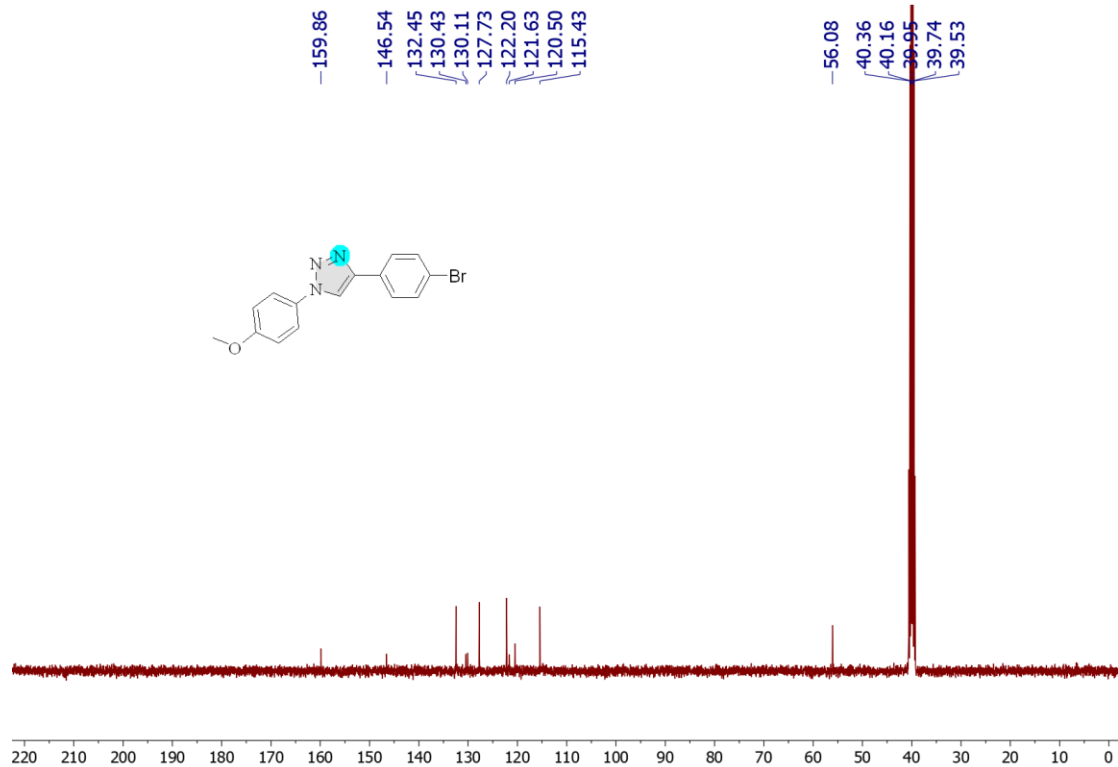

### DEPT of 4-(4-Bromophenyl)-1-(4-methoxyphenyl)-1H-1,2,3-triazole (3q)

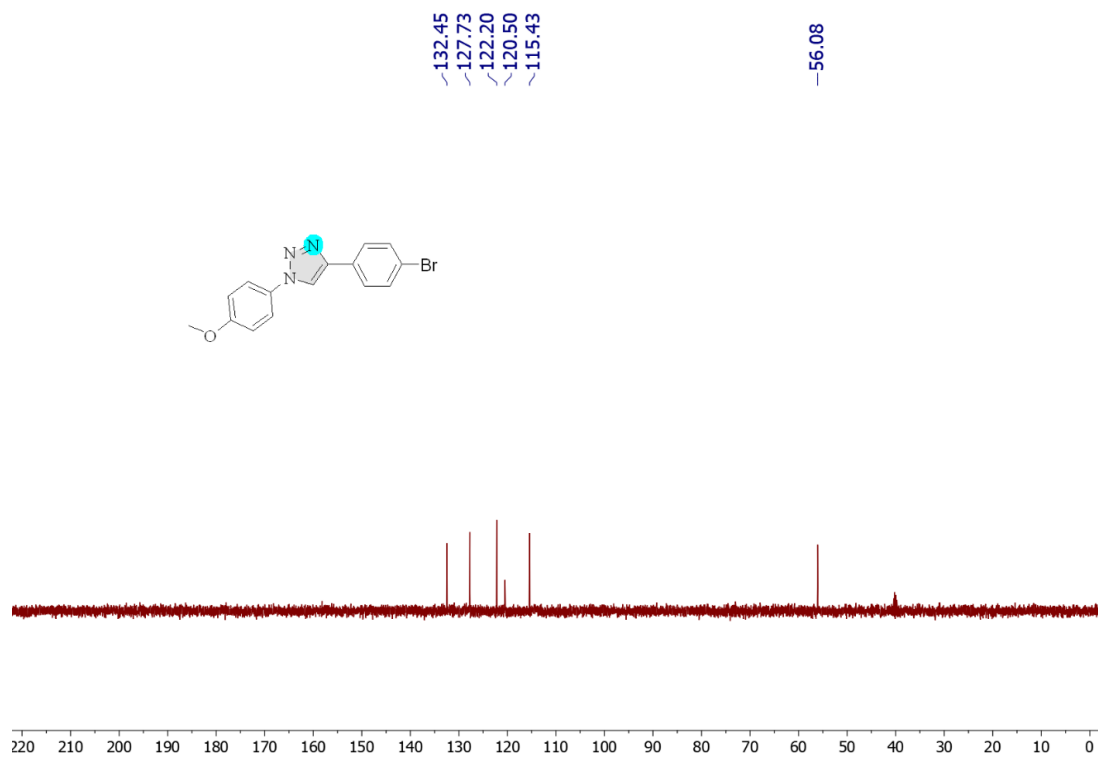

## HRMS of 4-(4-Bromophenyl)-1-(4-methoxyphenyl)-1H-1,2,3-triazole (3q)

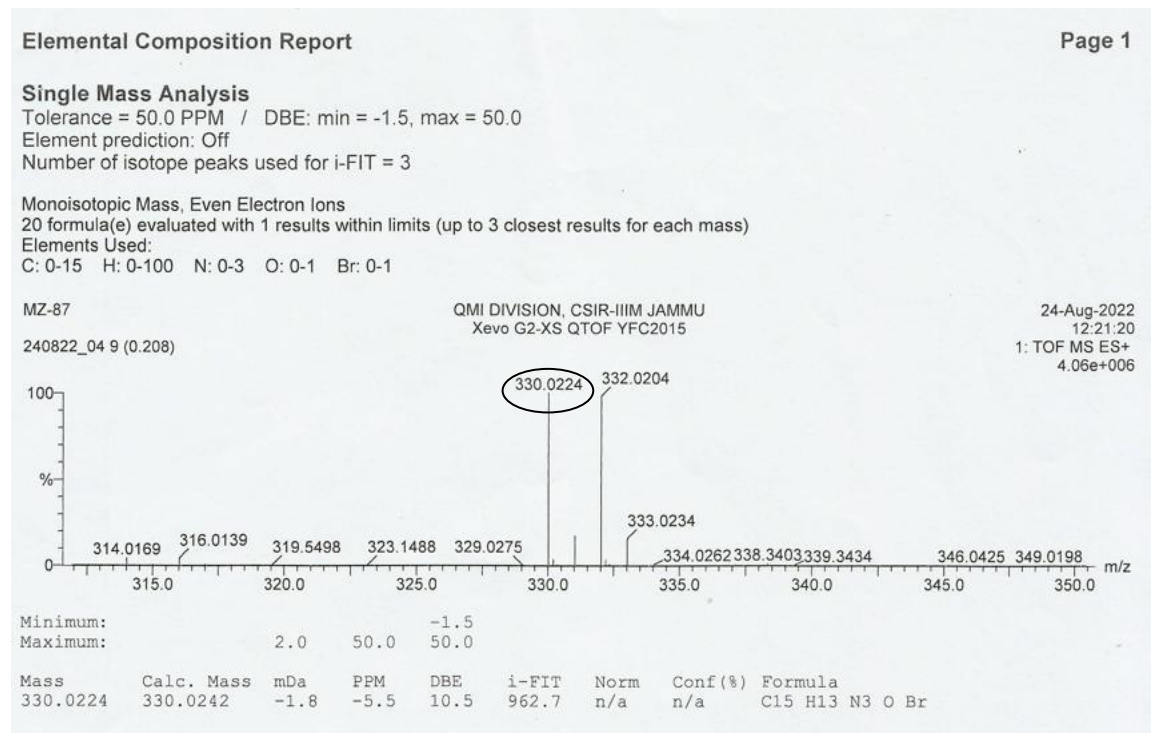

## <sup>1</sup>H-NMR of 4-(3-Fluorophenyl)-1-(4-methoxyphenyl)-1H-1,2,3-triazole (3r)

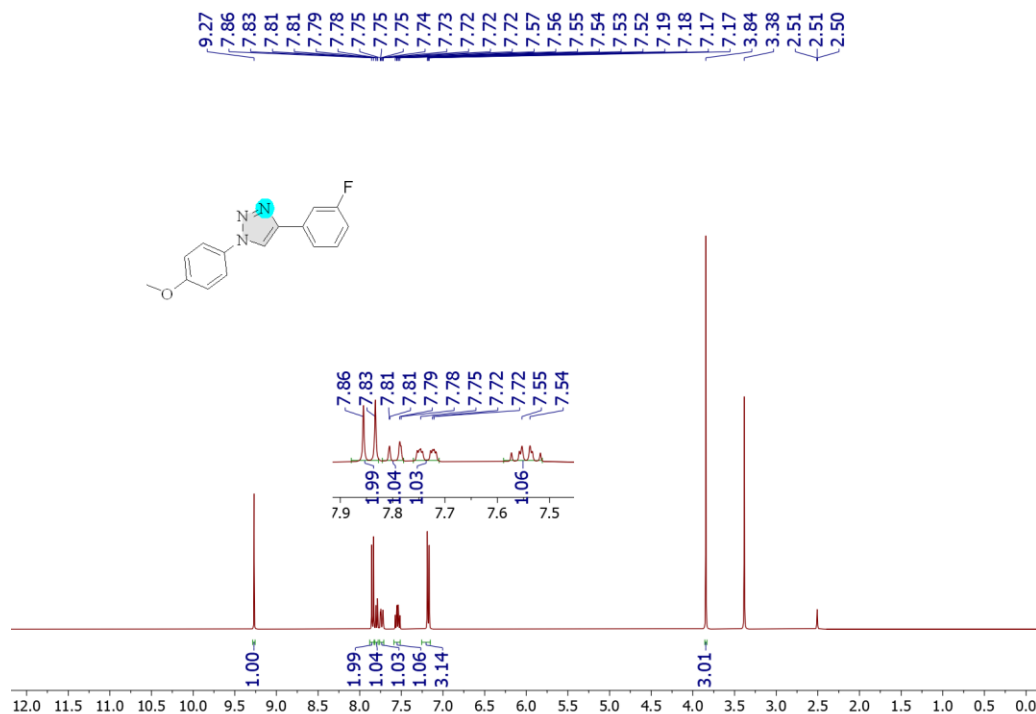

### <sup>13</sup>C-NMR of 4-(3-Fluorophenyl)-1-(4-methoxyphenyl)-1H-1,2,3-triazole (3r)

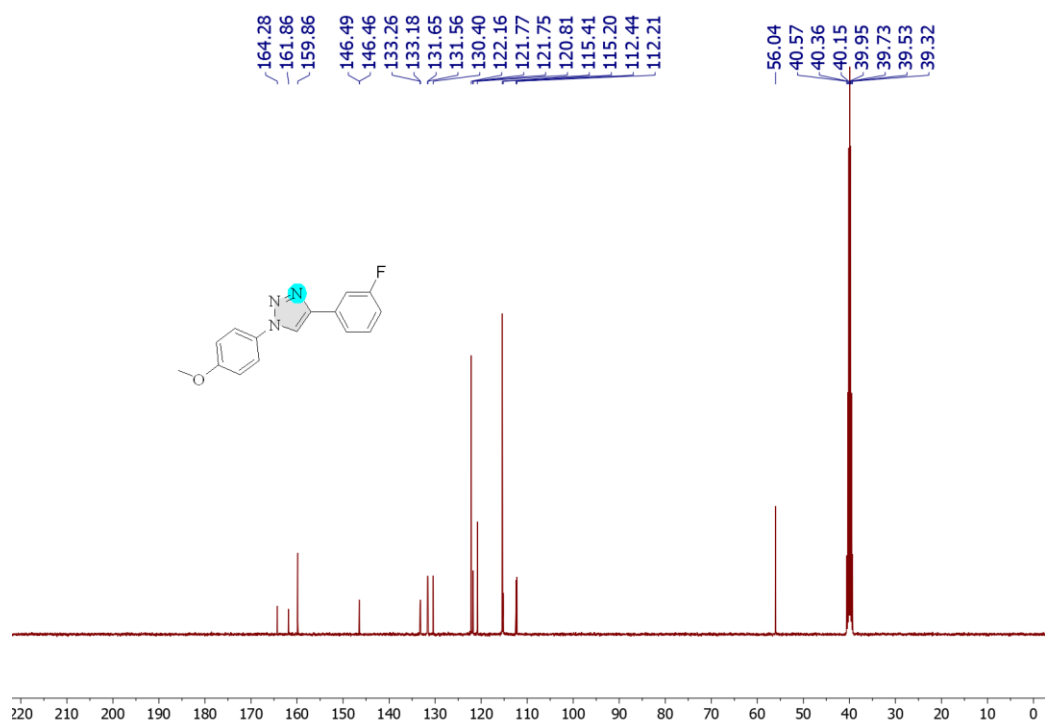

### DEPT of 4-(3-Fluorophenyl)-1-(4-methoxyphenyl)-1H-1,2,3-triazole (3r)

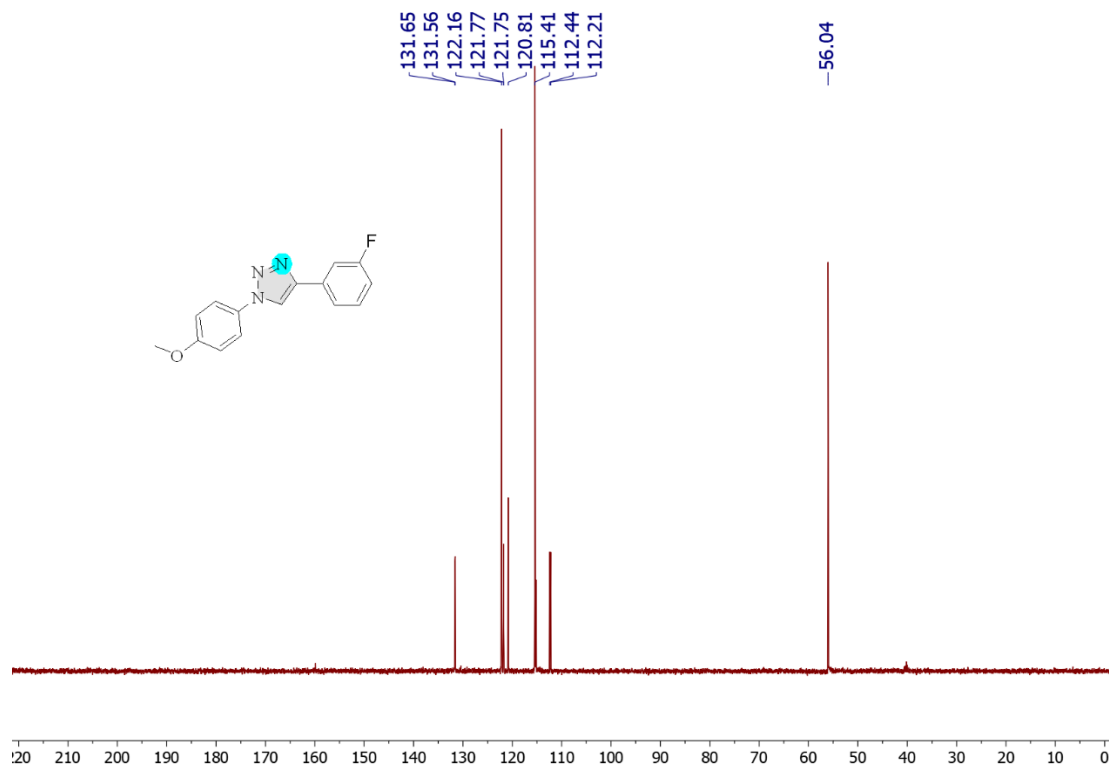

**<sup>19</sup>F-NMR of 4-(3-Fluorophenyl)-1-(4-methoxyphenyl)-1H-1,2,3-triazole (3r)**

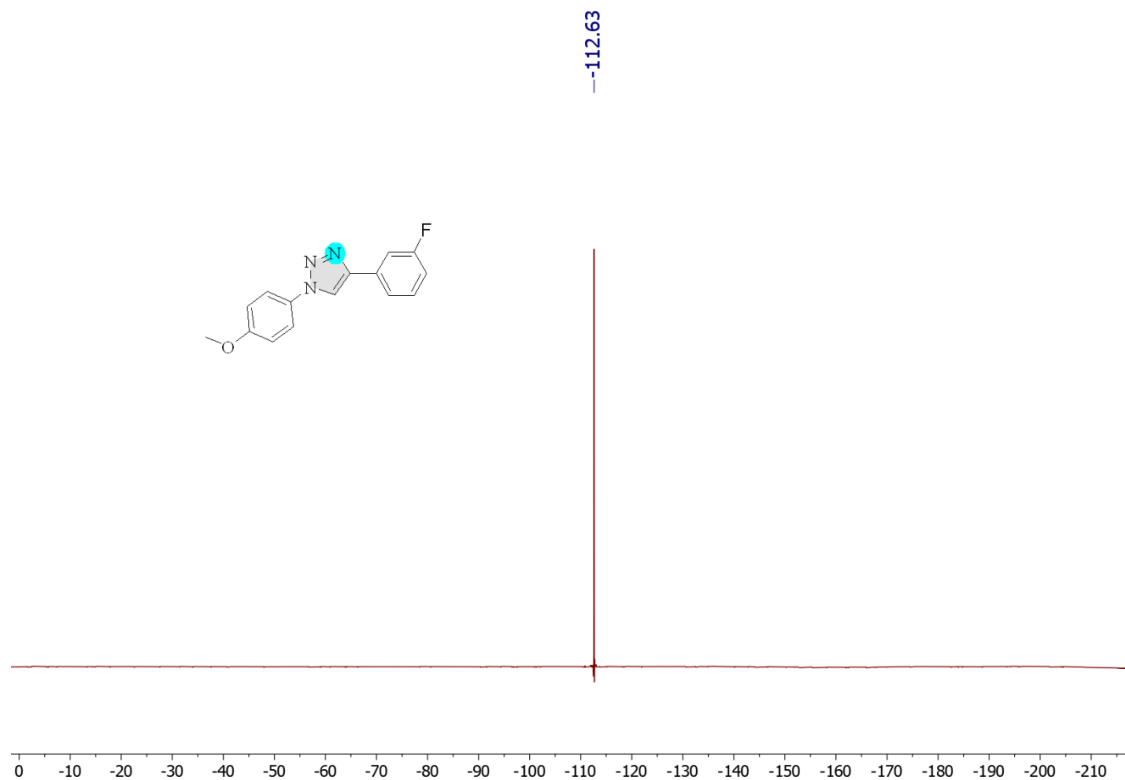

**HRMS of 4-(3-Fluorophenyl)-1-(4-methoxyphenyl)-1H-1,2,3-triazole (3r)**

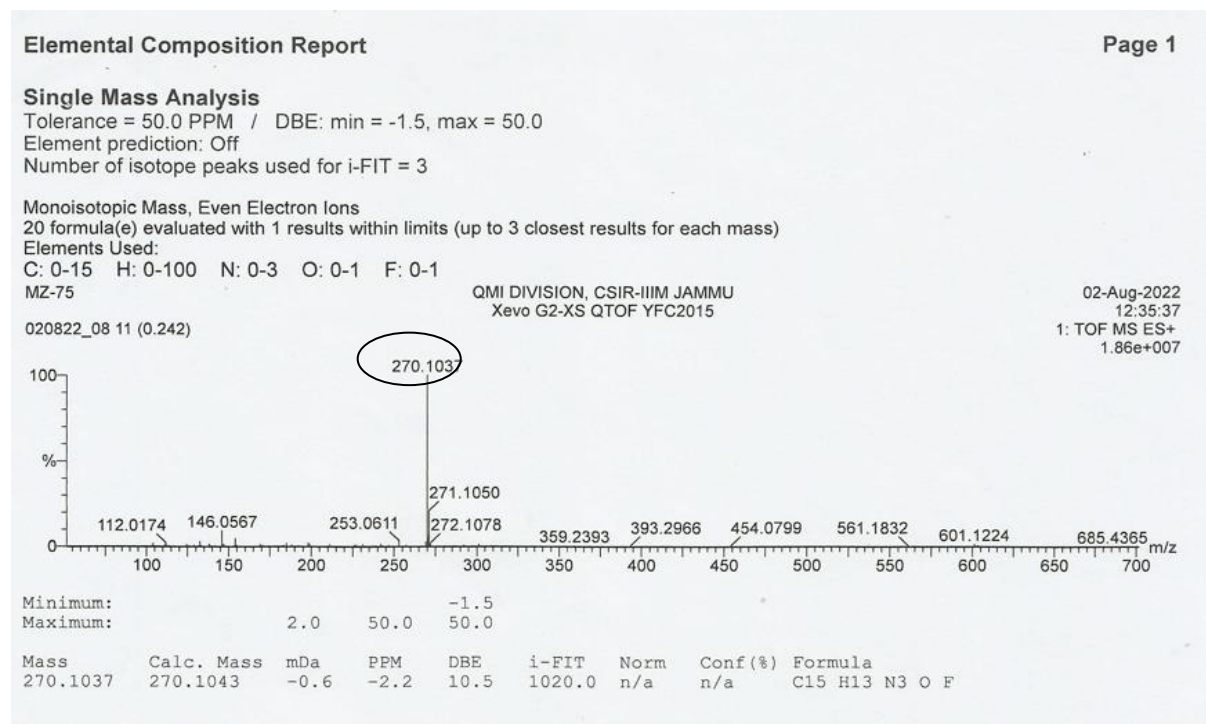

**<sup>1</sup>H-NMR of 4-(3,5-Difluorophenyl)-1-(4-methoxyphenyl)-1H-1,2,3-triazole (3s)**

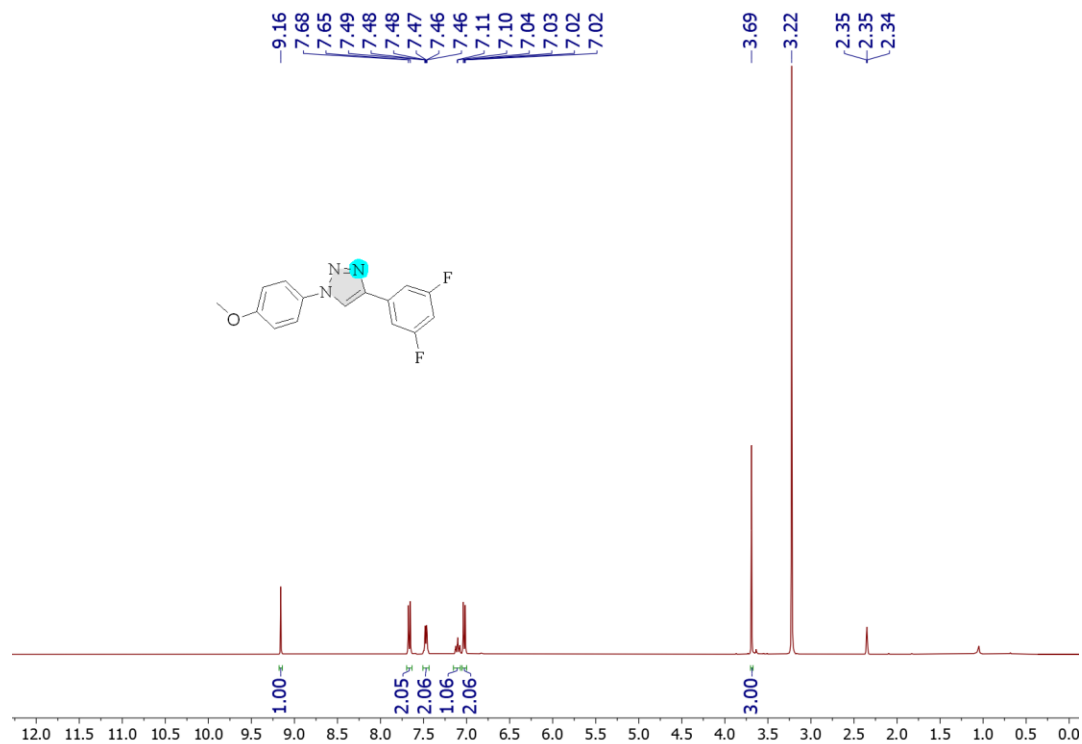

**<sup>19</sup>F-NMR of 4-(3,5-Difluorophenyl)-1-(4-methoxyphenyl)-1H-1,2,3-triazole (3s)**

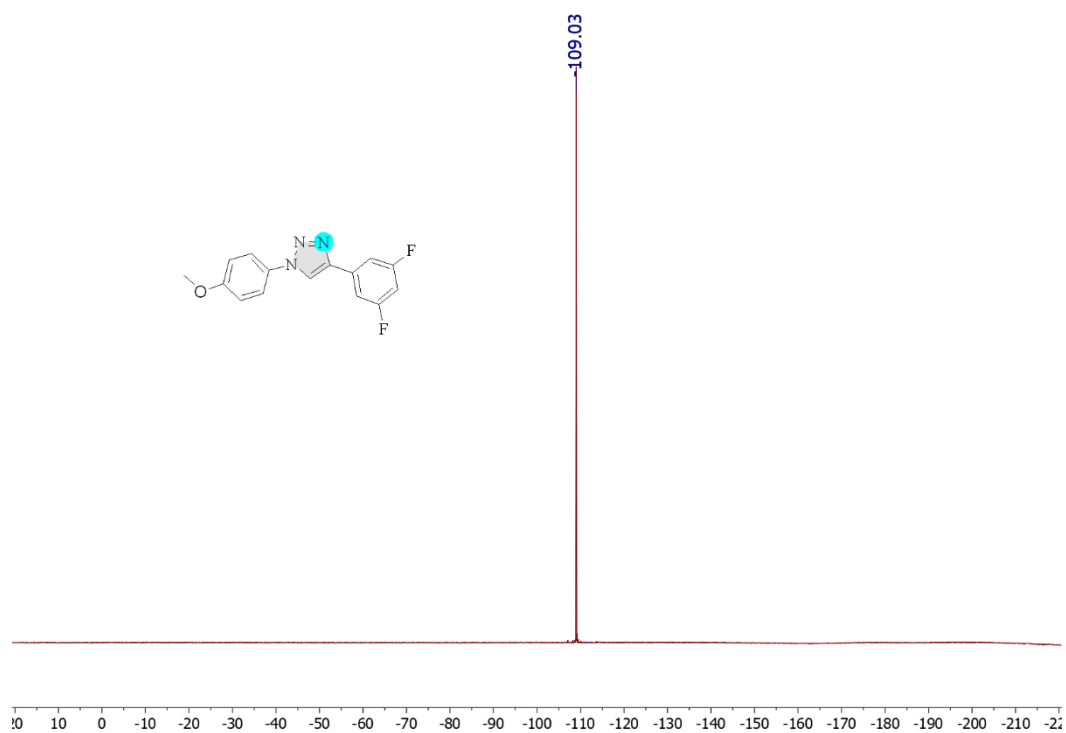

### <sup>13</sup>C-NMR of 4-(3,5-Difluorophenyl)-1-(4-methoxyphenyl)-1H-1,2,3-triazole (3s)

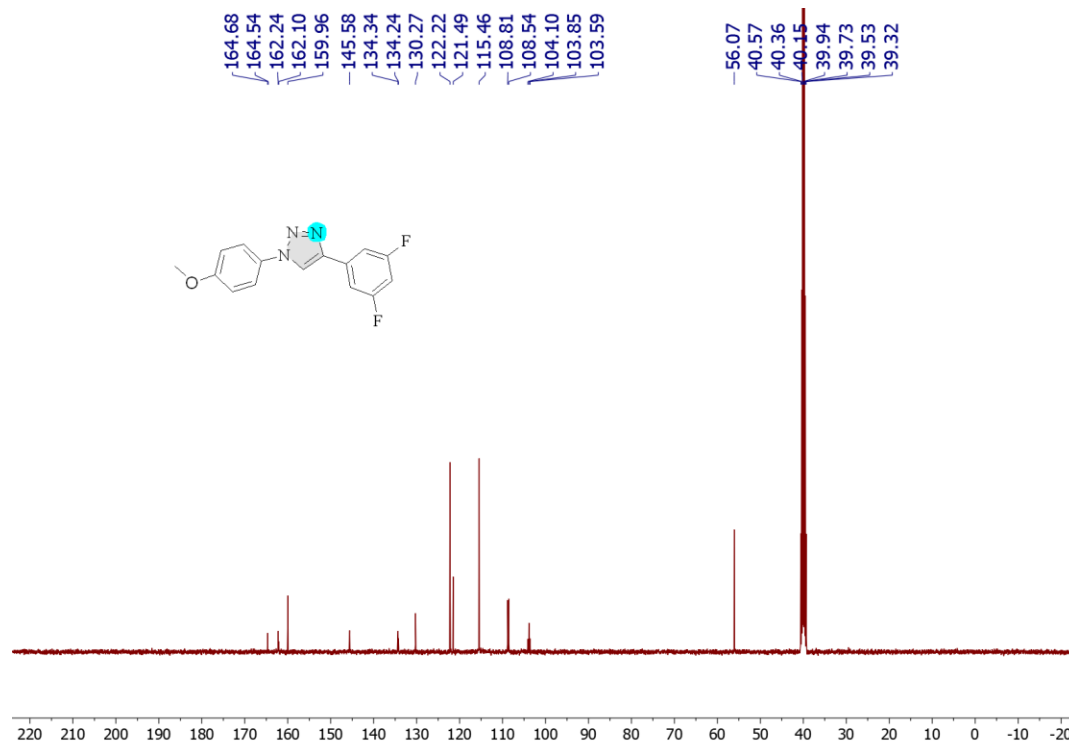

### DEPT of 4-(3,5-Difluorophenyl)-1-(4-methoxyphenyl)-1H-1,2,3-triazole (3s)

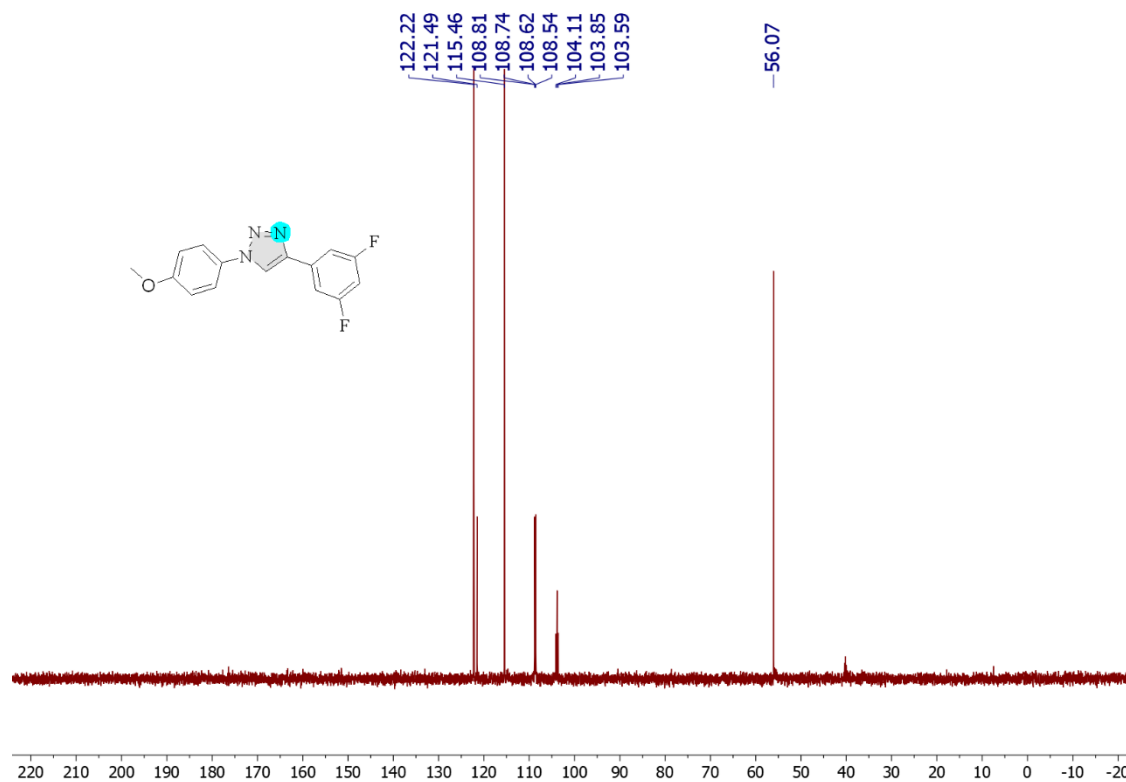

## HRMS of 4-(3,5-Difluorophenyl)-1-(4-methoxyphenyl)-1H-1,2,3-triazole (3s)

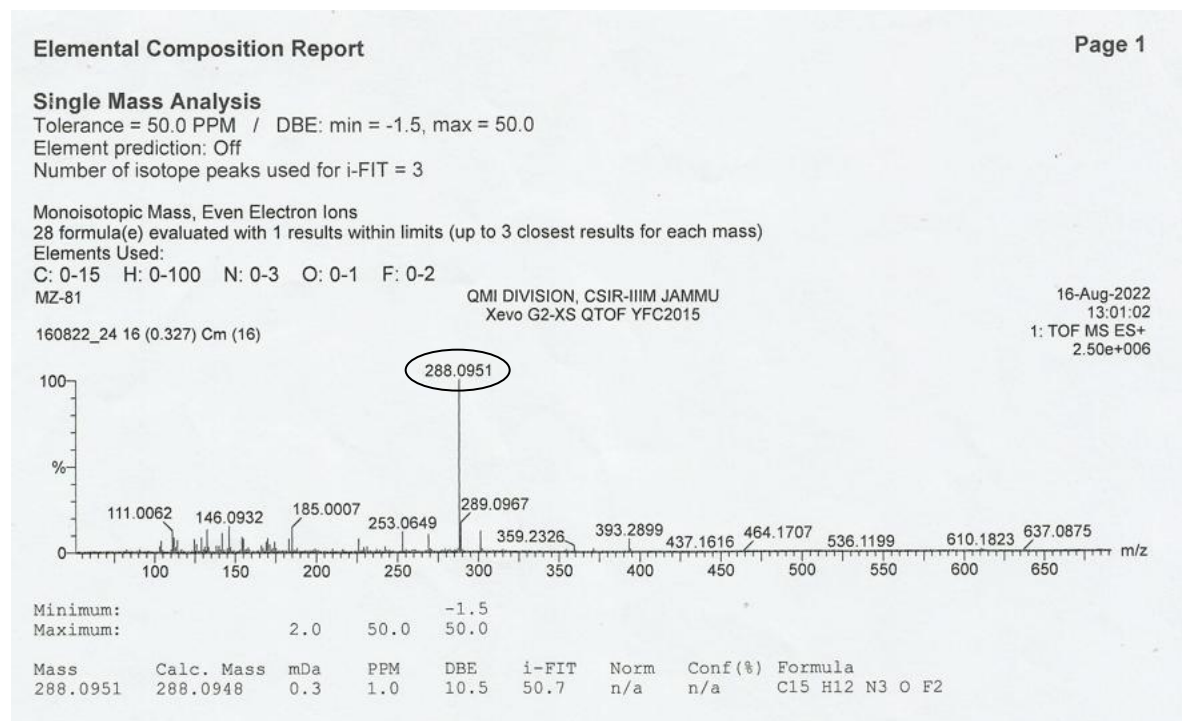

## <sup>1</sup>H-NMR of 1-(4-Fluorophenyl)-4-phenyl-1H-1,2,3-triazole (3t)

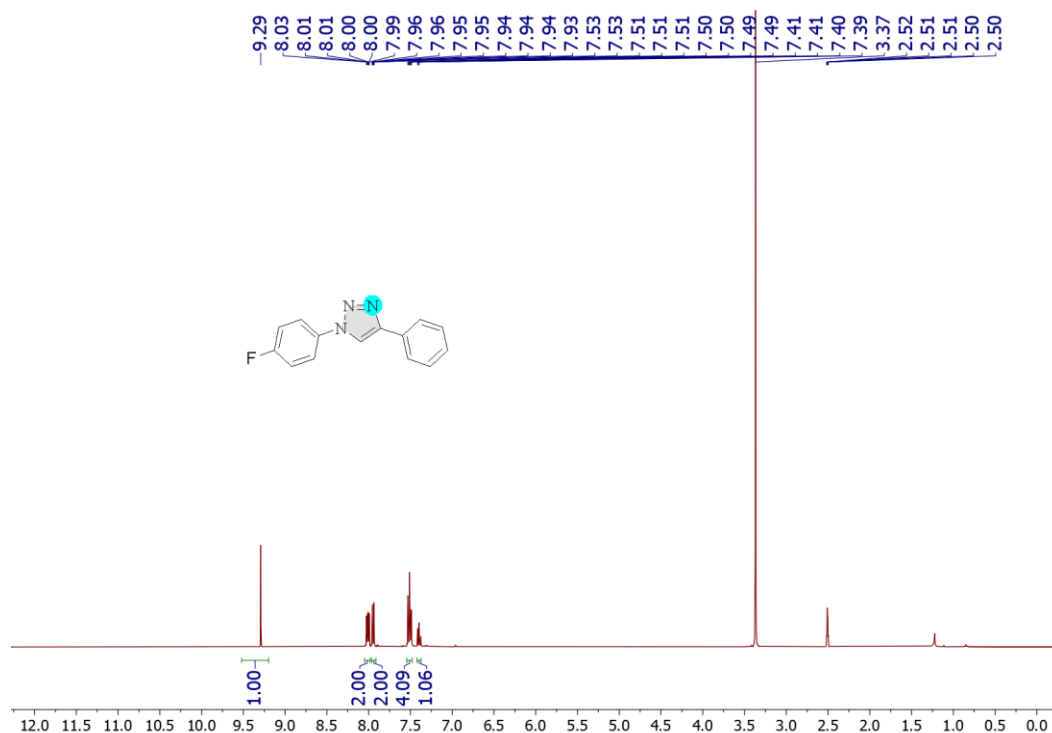

### <sup>13</sup>C-NMR of 1-(4-Fluorophenyl)-4-phenyl-1H-1,2,3-triazole (3t)

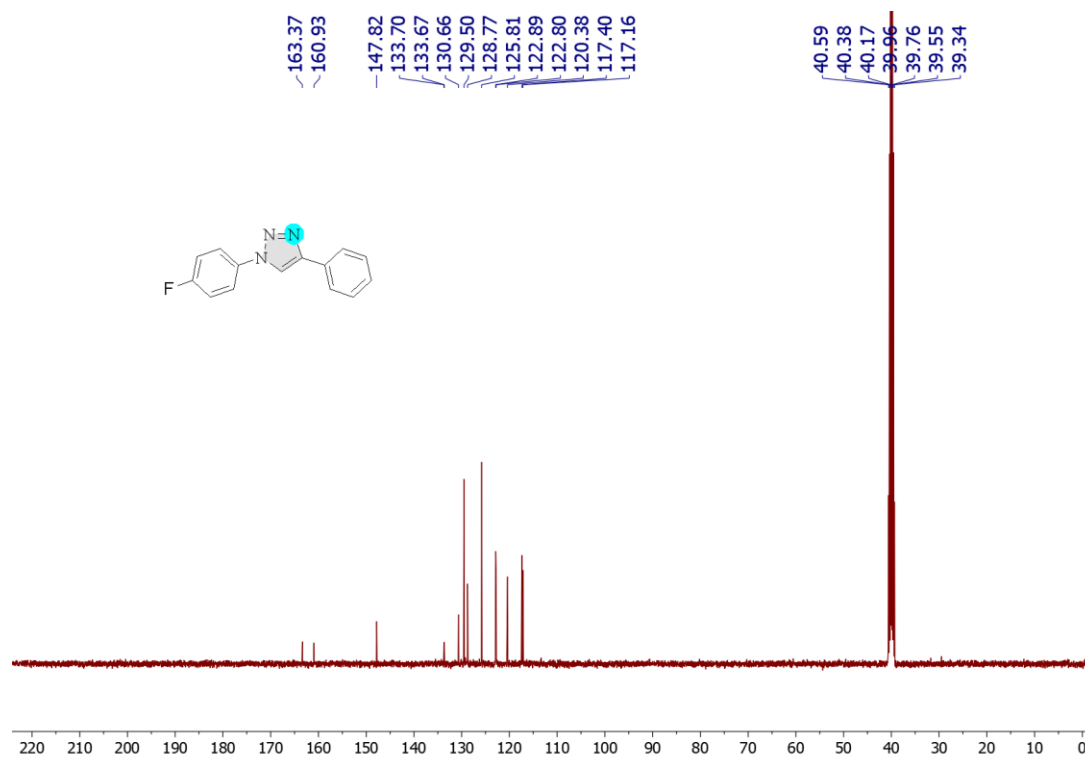

### DEPT of 1-(4-Fluorophenyl)-4-phenyl-1H-1,2,3-triazole (3t)

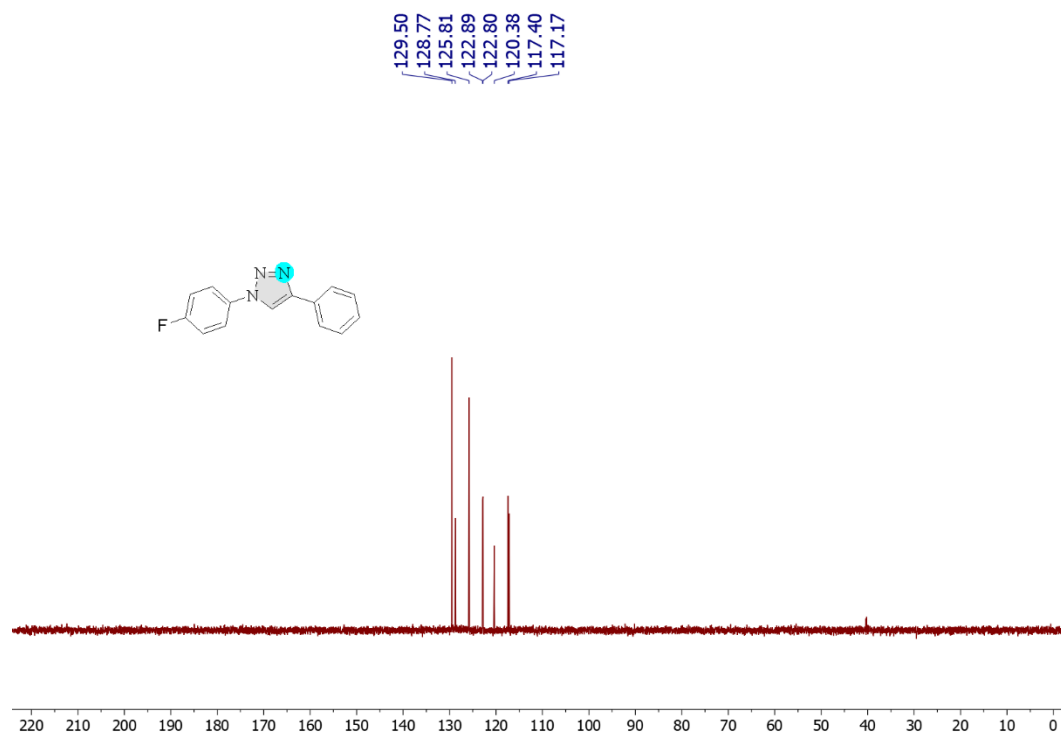

### <sup>19</sup>F of 1-(4-Fluorophenyl)-4-phenyl-1H-1,2,3-triazole (3t)

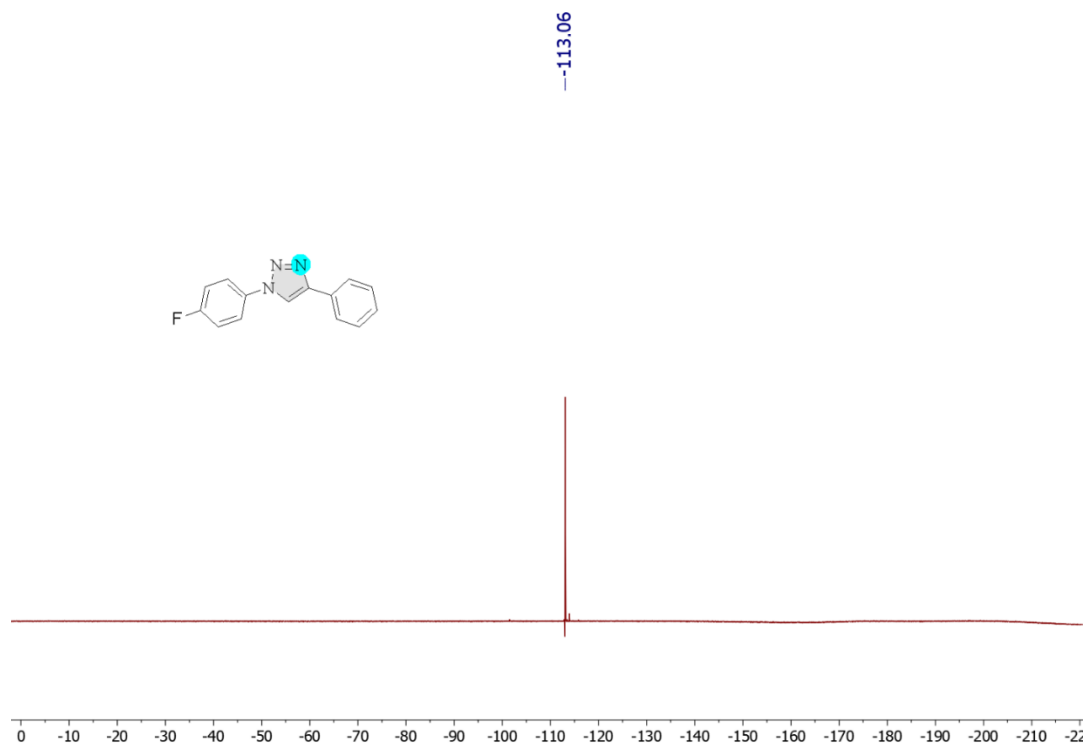

### HRMS of 1-(4-Fluorophenyl)-4-phenyl-1H-1,2,3-triazole (3t)

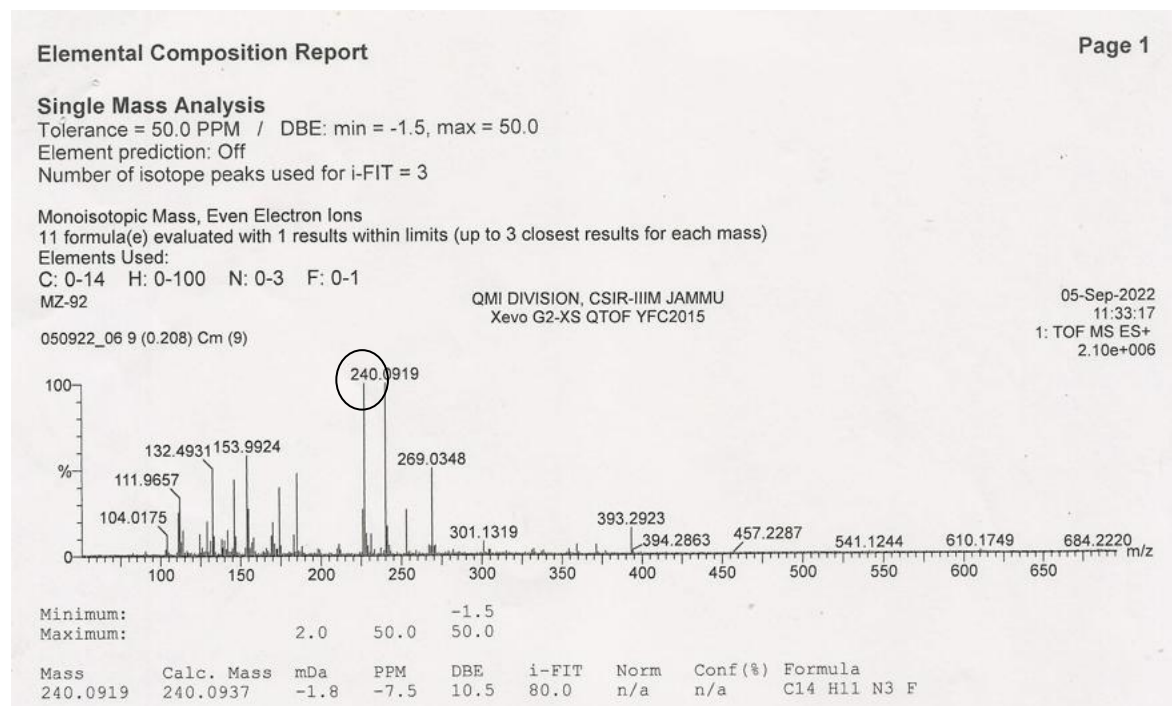

**<sup>1</sup>H-NMR of 1-(4-Fluorophenyl)-4-(4-methoxyphenyl)-1H-1,2,3-triazole (3u)**

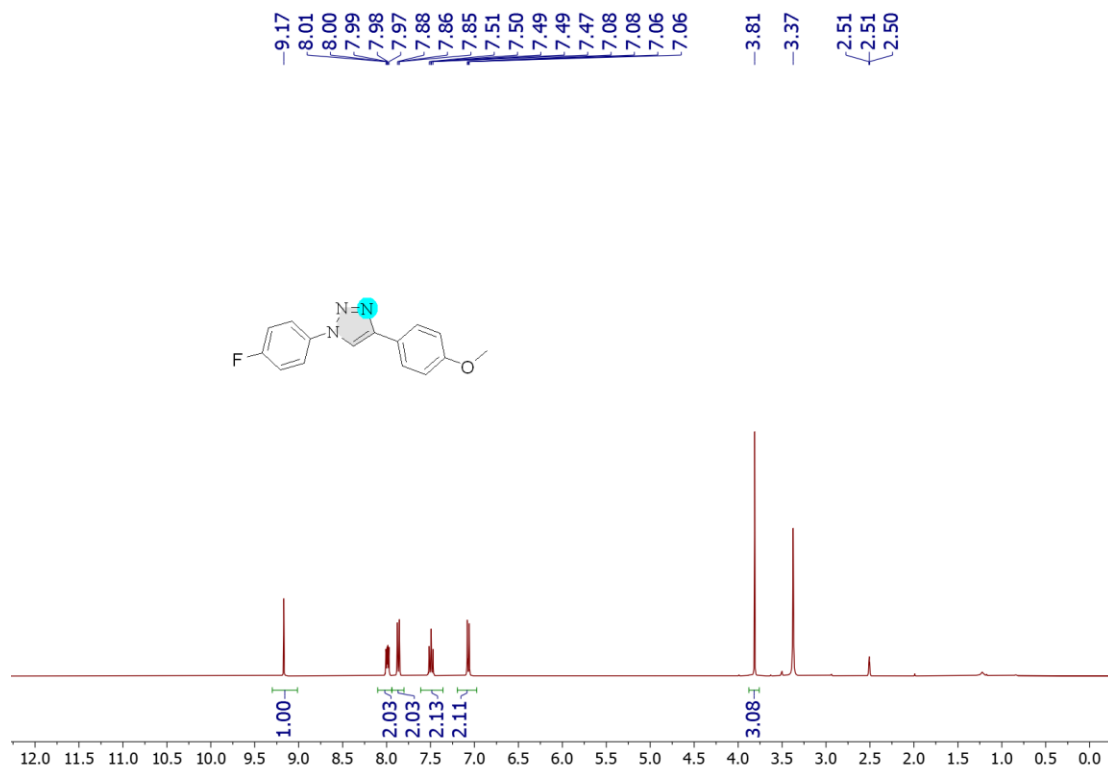

**<sup>13</sup>C-NMR of 1-(4-Fluorophenyl)-4-(4-methoxyphenyl)-1H-1,2,3-triazole (3u)**

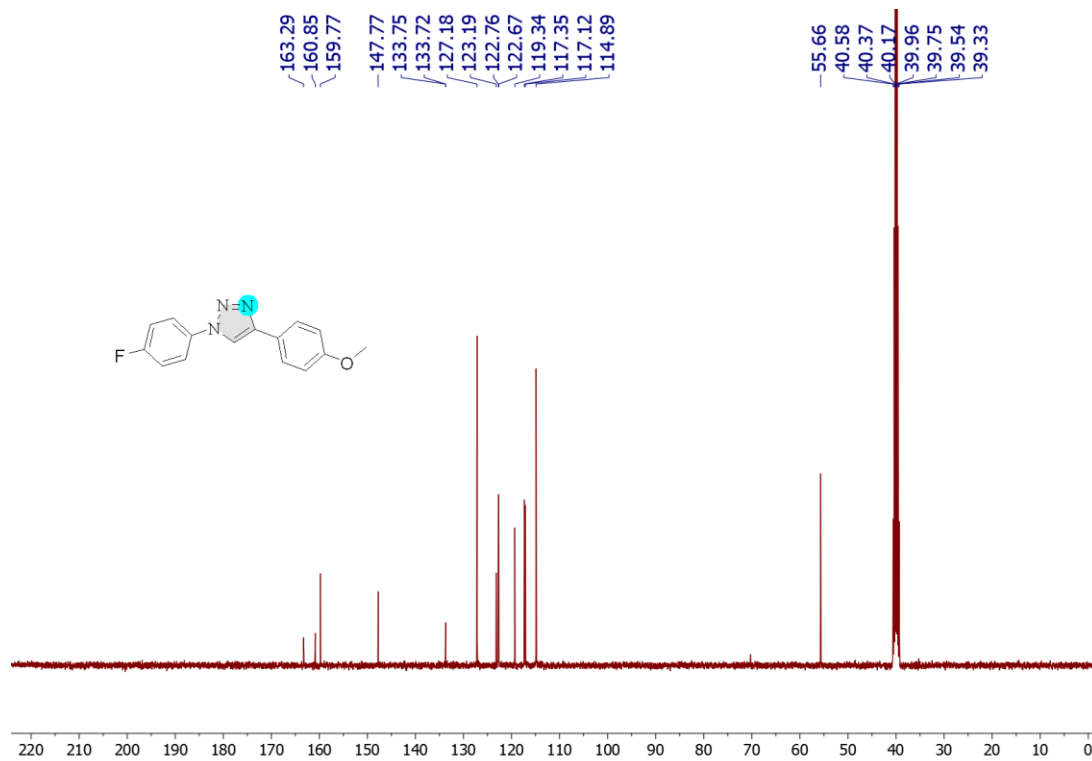

DEPT of 1-(4-Fluorophenyl)-4-(4-methoxyphenyl)-1*H*-1,2,3-triazole (3u)

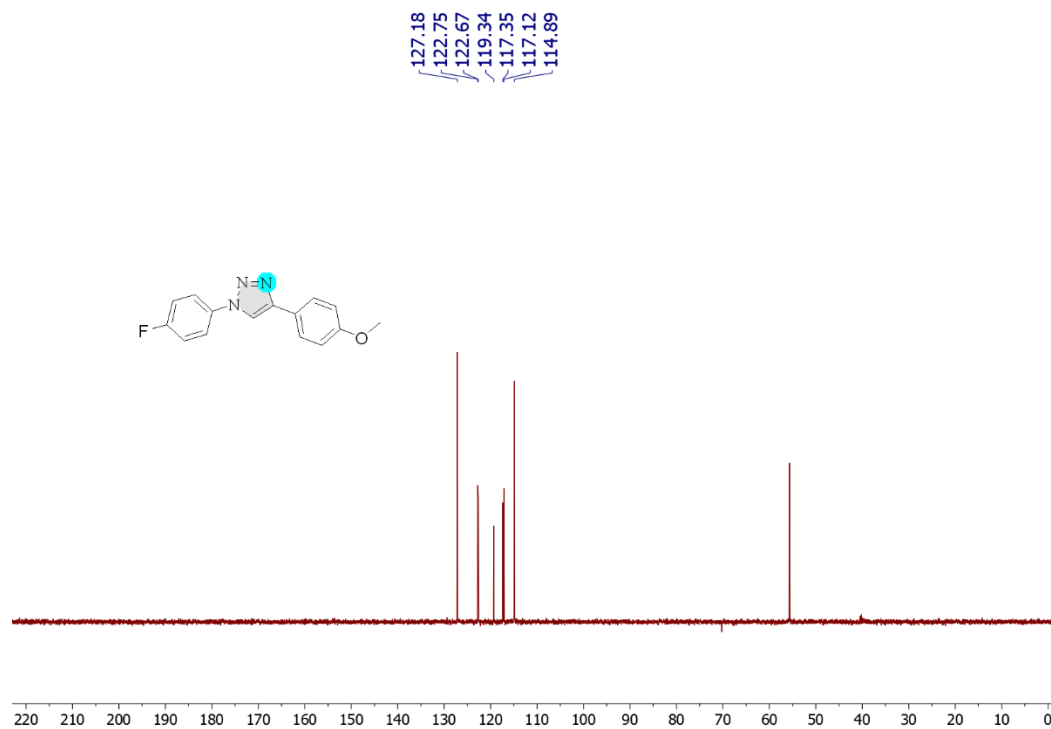

<sup>19</sup>F of 1-(4-Fluorophenyl)-4-(4-methoxyphenyl)-1*H*-1,2,3-triazole (3u)

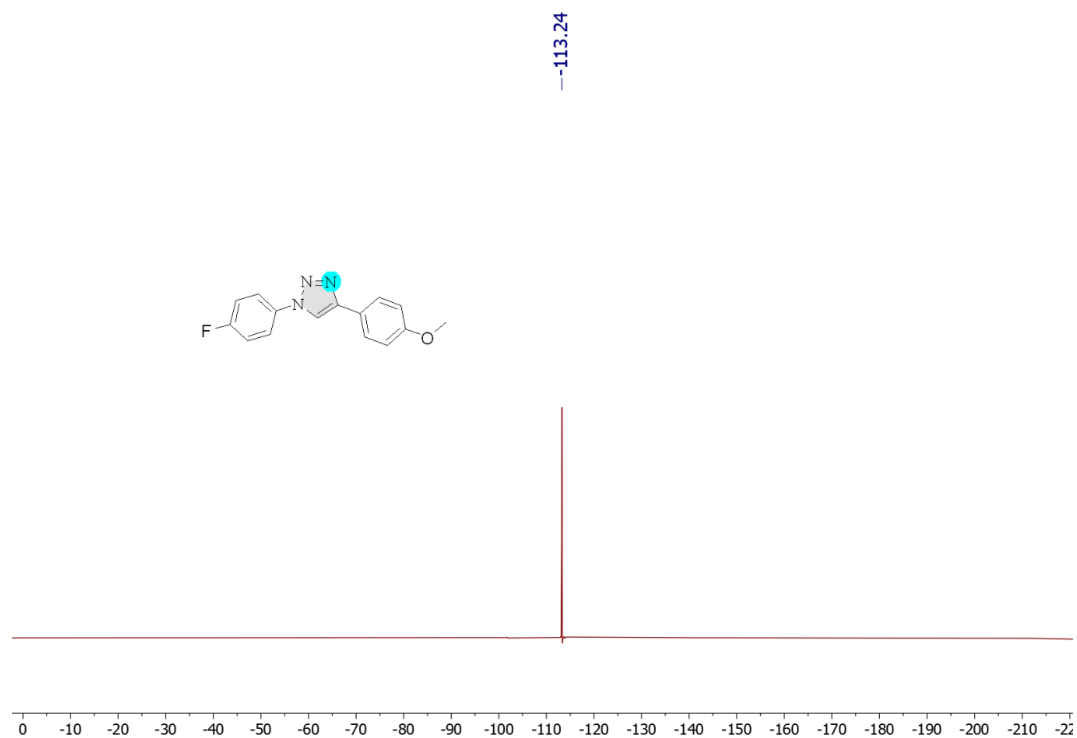

## HRMS of 1-(4-Fluorophenyl)-4-(4-methoxyphenyl)-1H-1,2,3-triazole (3u)

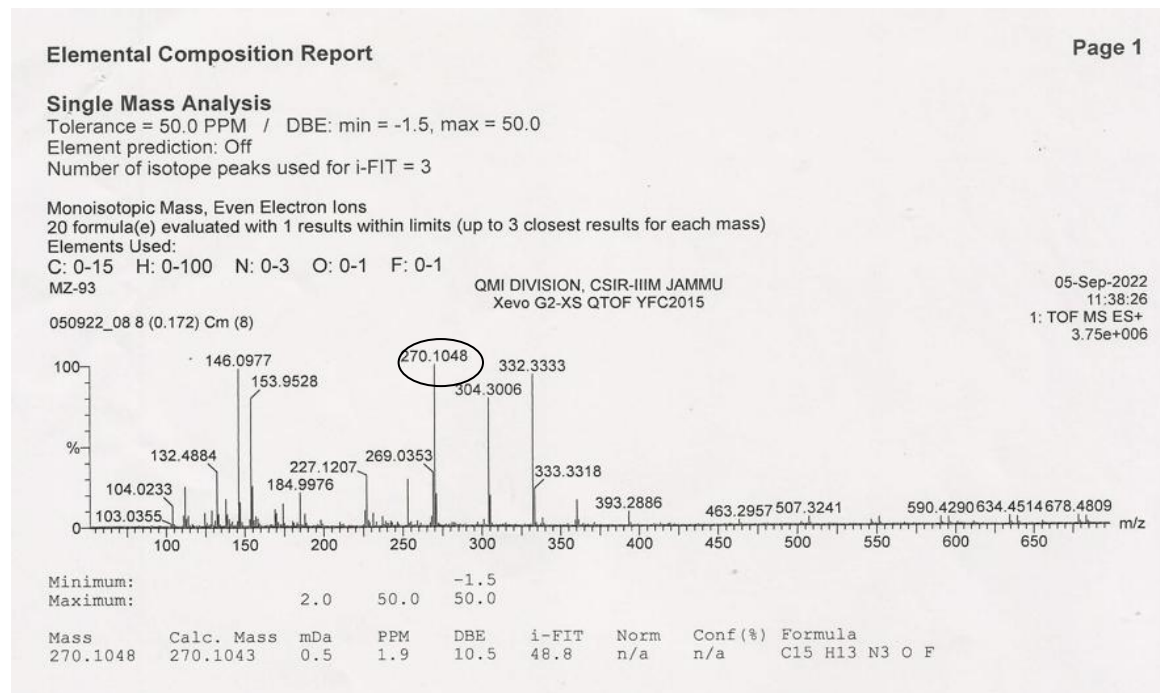

## <sup>1</sup>H-NMR of 4-(4-Phenyl-1H-1,2,3-triazol-1-yl)benzotrile (3v)

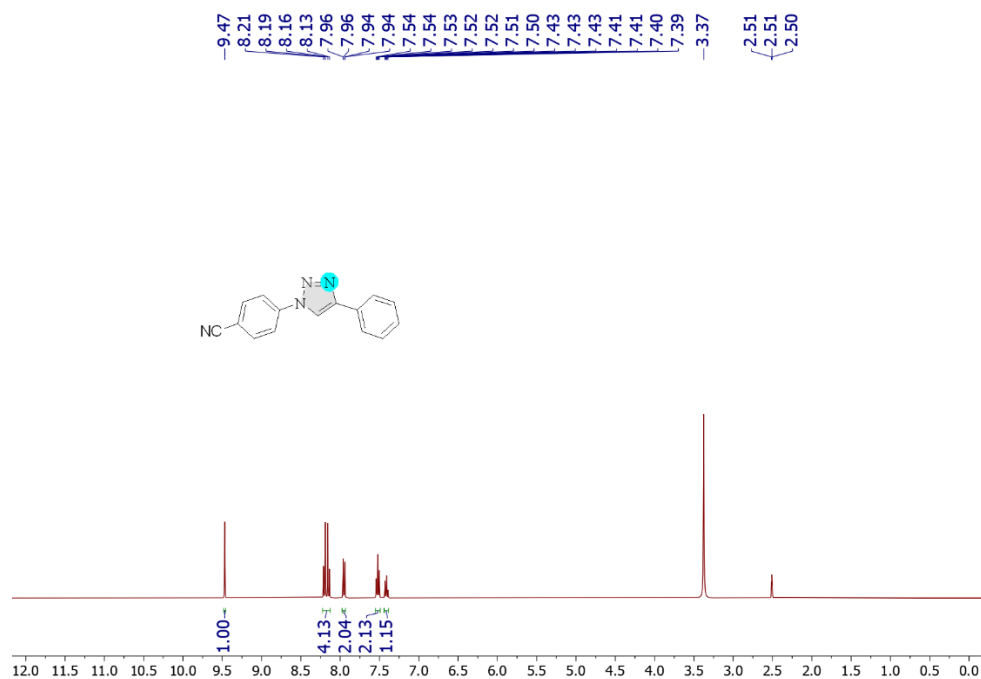

### <sup>13</sup>C-NMR of 4-(4-Phenyl-1H-1,2,3-triazol-1-yl)benzonitrile (3v)

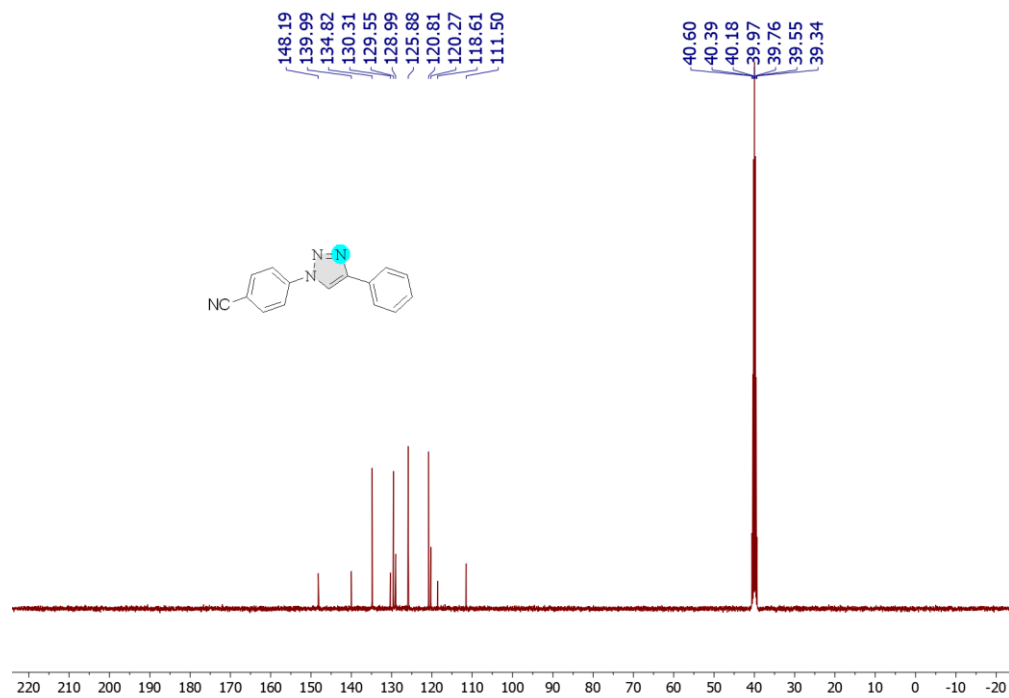

### DEPT of 4-(4-Phenyl-1H-1,2,3-triazol-1-yl)benzonitrile (3v)

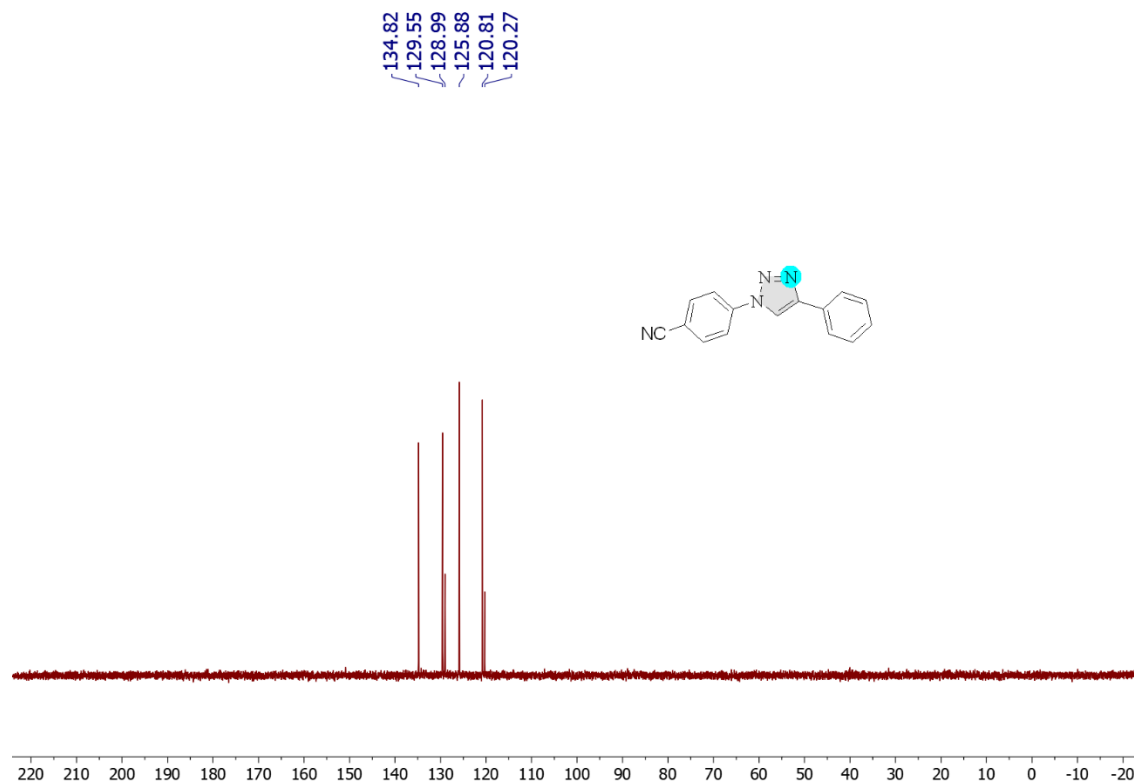

## HRMS of 4-(4-Phenyl-1*H*-1,2,3-triazol-1-yl)benzotrile (3v)

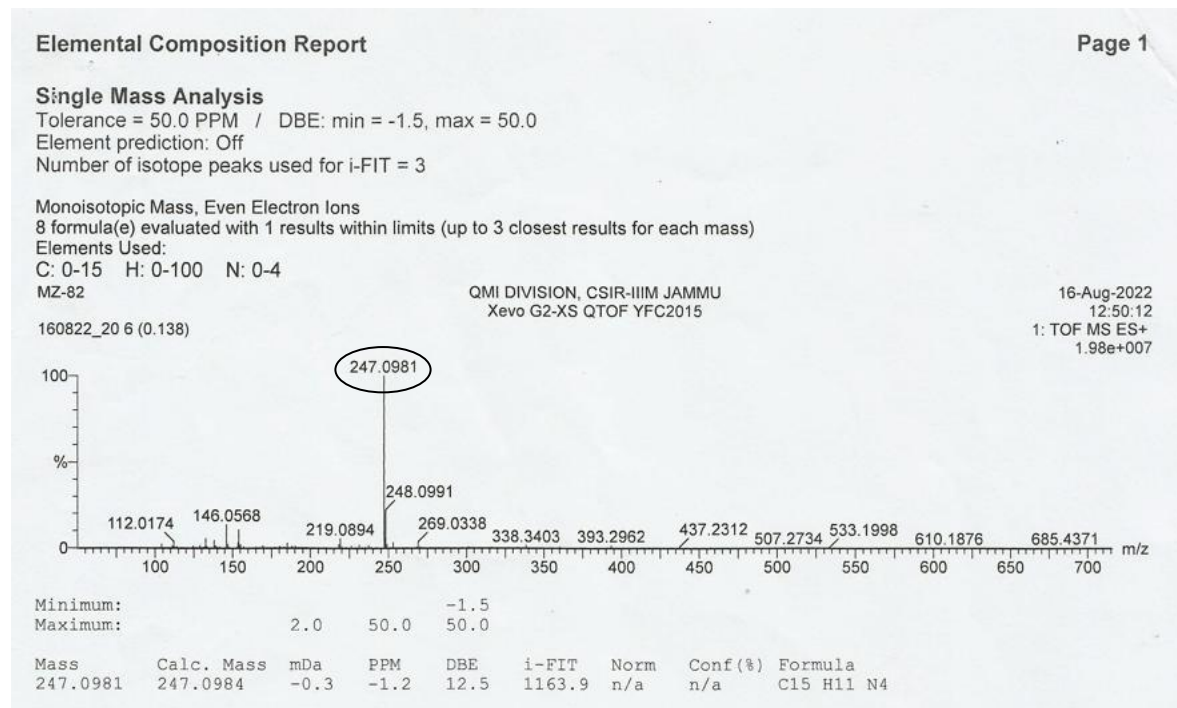

## <sup>1</sup>H-NMR of 4-(4-(4-Methoxyphenyl)-1*H*-1,2,3-triazol-1-yl)benzotrile (3w)

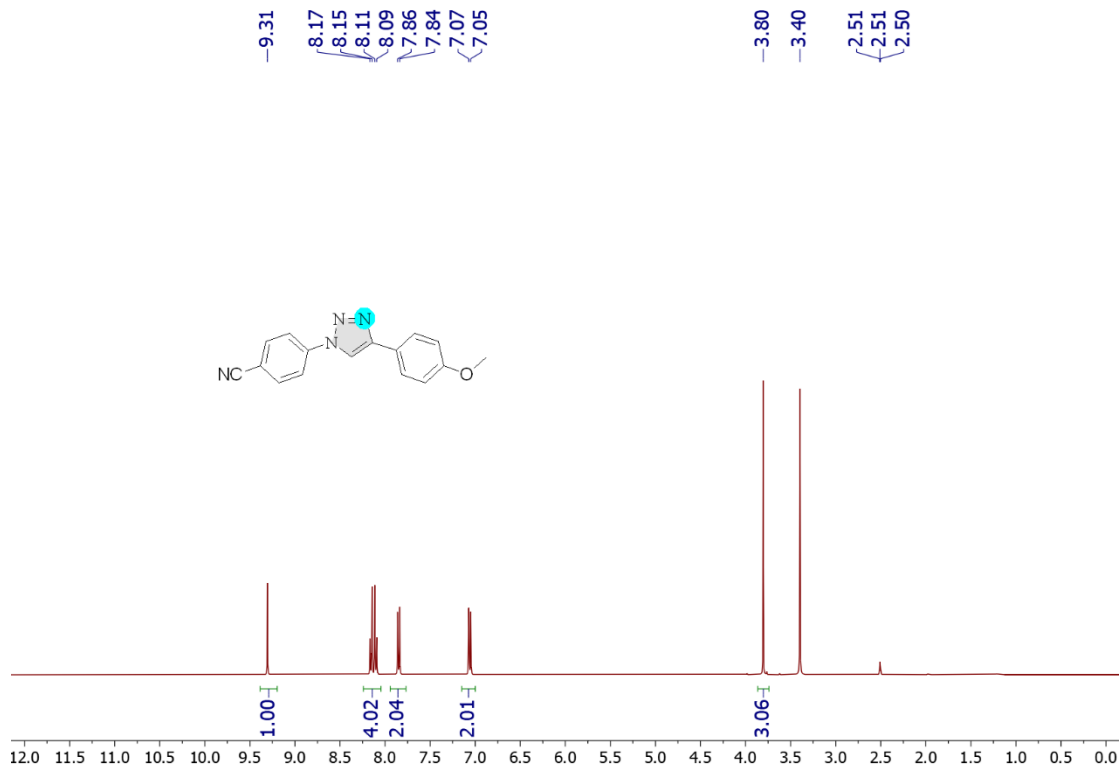

**<sup>13</sup>C-NMR of 4-(4-(4-Methoxyphenyl)-1H-1,2,3-triazol-1-yl)benzotrile (3w)**

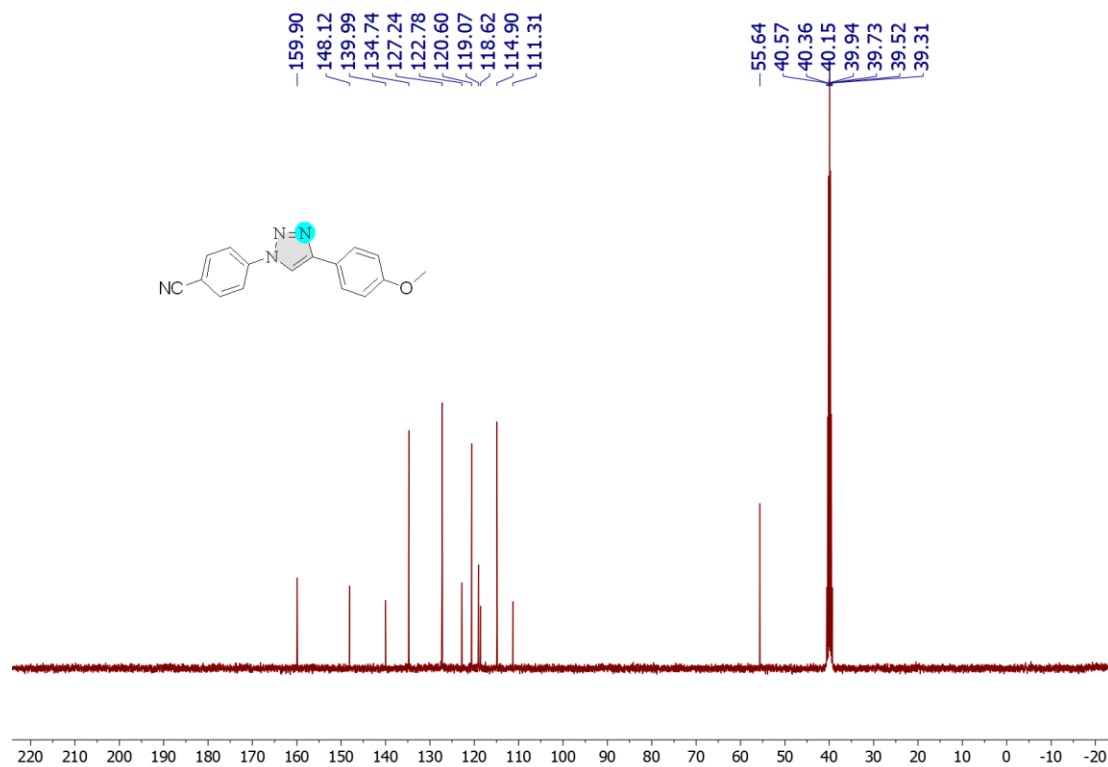

**DEPT of 4-(4-(4-Methoxyphenyl)-1H-1,2,3-triazol-1-yl)benzotrile (3w)**

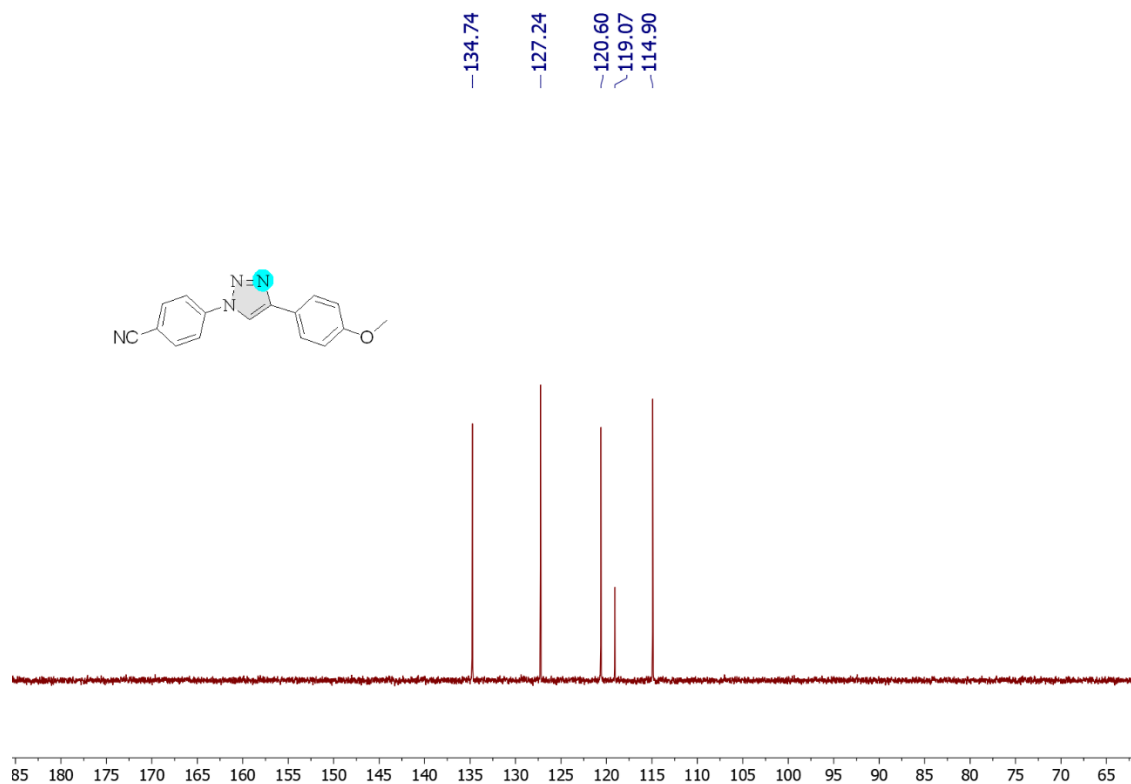

# HRMS of 4-(4-(4-Methoxyphenyl)-1H-1,2,3-triazol-1-yl)benzotrile (3w)

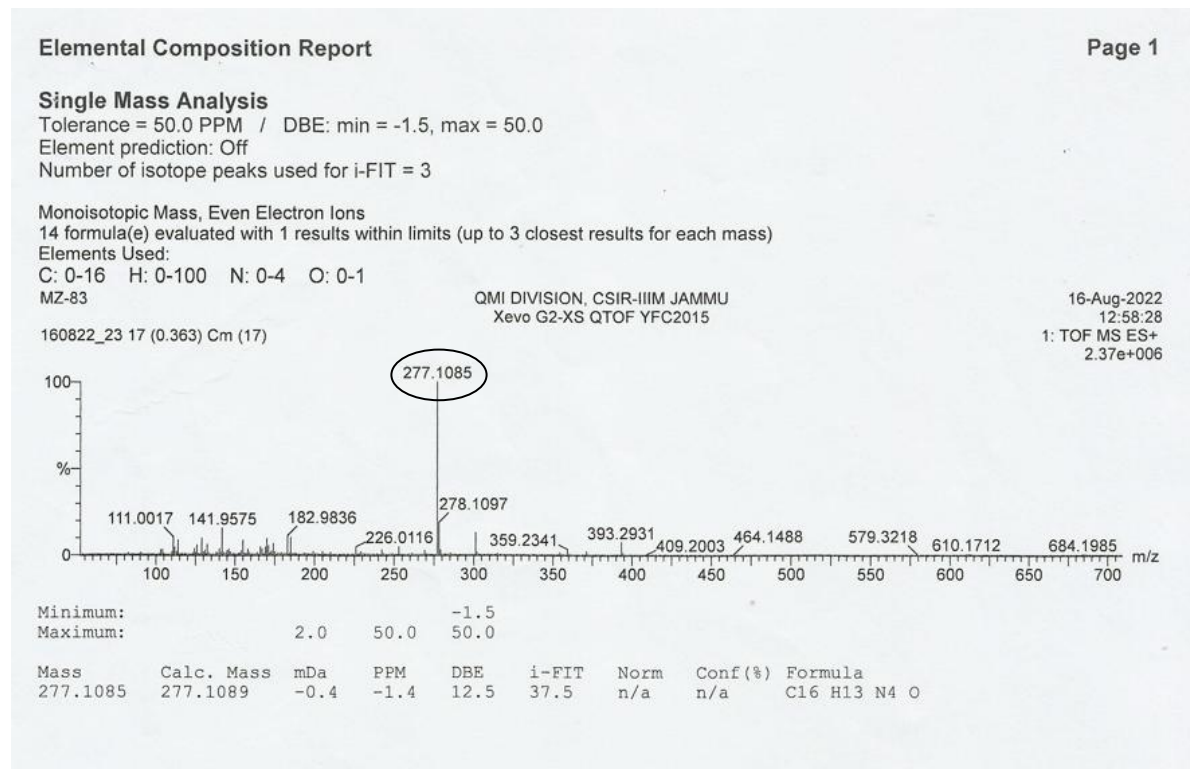

# <sup>1</sup>H-NMR of 4-Butyl-1-phenyl-4,5-dihydro-1H-1,2,3-triazole (3x)

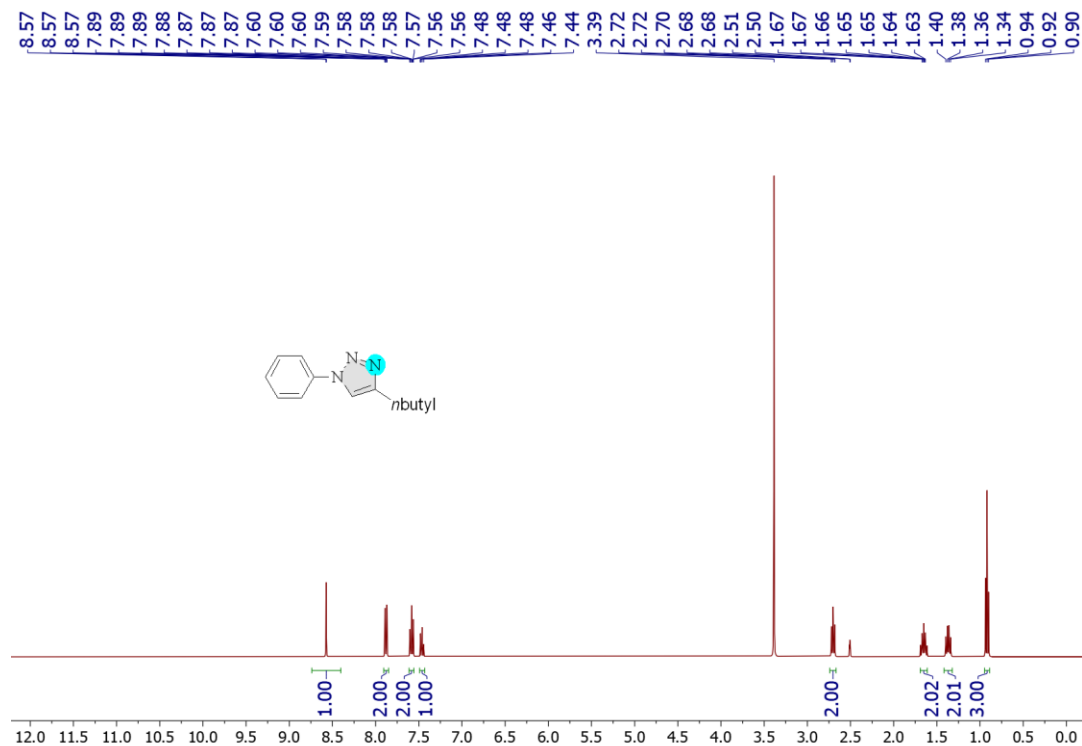

### <sup>13</sup>C-NMR of 4-Butyl-1-phenyl-4,5-dihydro-1H-1,2,3-triazole (3x)

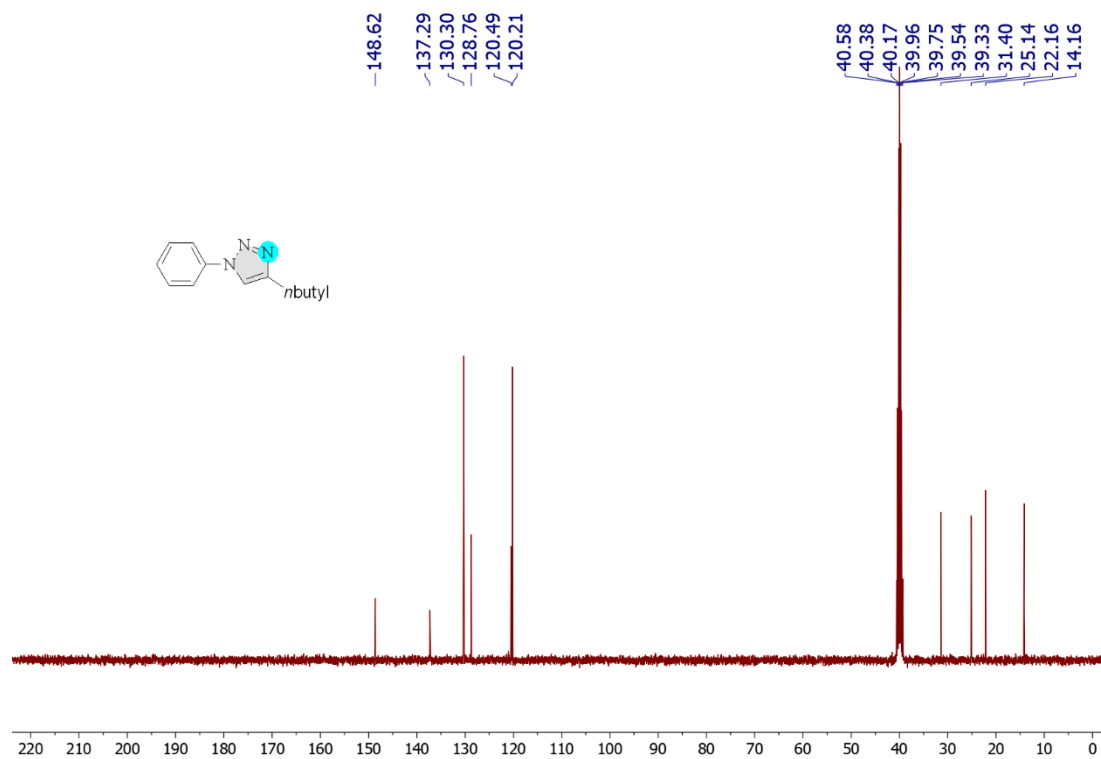

### DEPT of 4-Butyl-1-phenyl-4,5-dihydro-1H-1,2,3-triazole (3x)

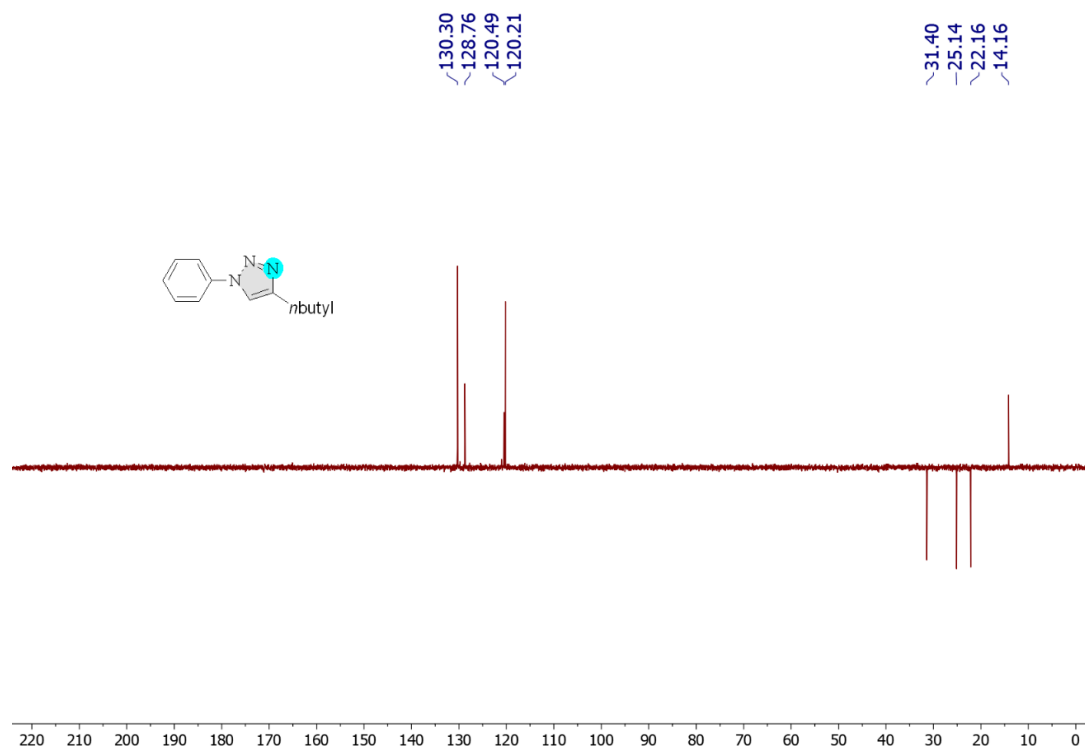

## HRMS of 4-Butyl-1-phenyl-4,5-dihydro-1H-1,2,3-triazole (3x)

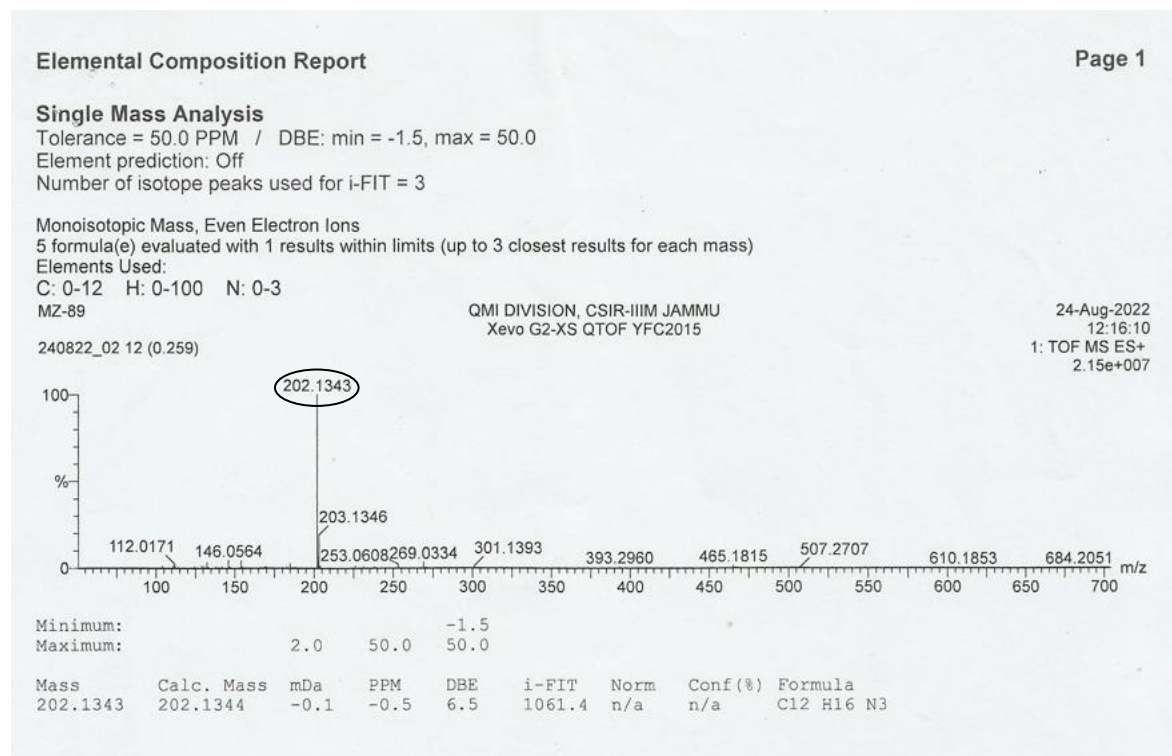

## <sup>1</sup>H-NMR of 4-(4-(4-Butylphenyl)-1H-1,2,3-triazol-1-yl)benzonitrile (3y)

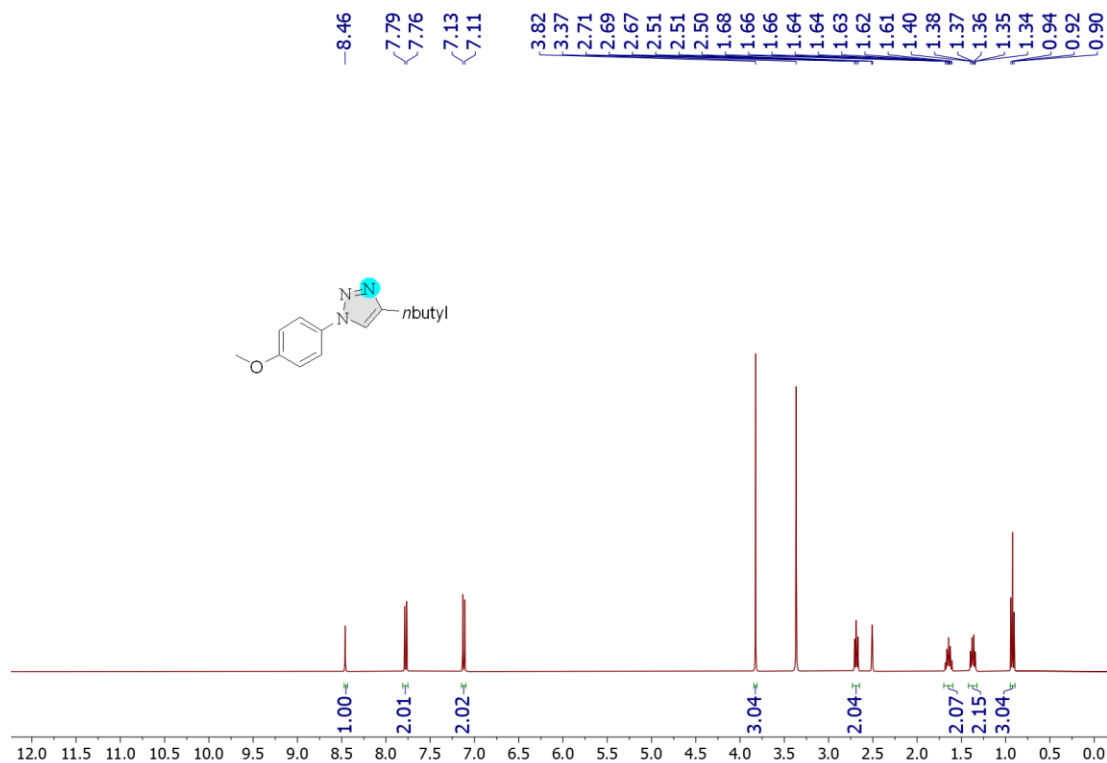

### <sup>13</sup>C-NMR of 4-(4-(4-Butylphenyl)-1H-1,2,3-triazol-1-yl)benzonitrile (3y)

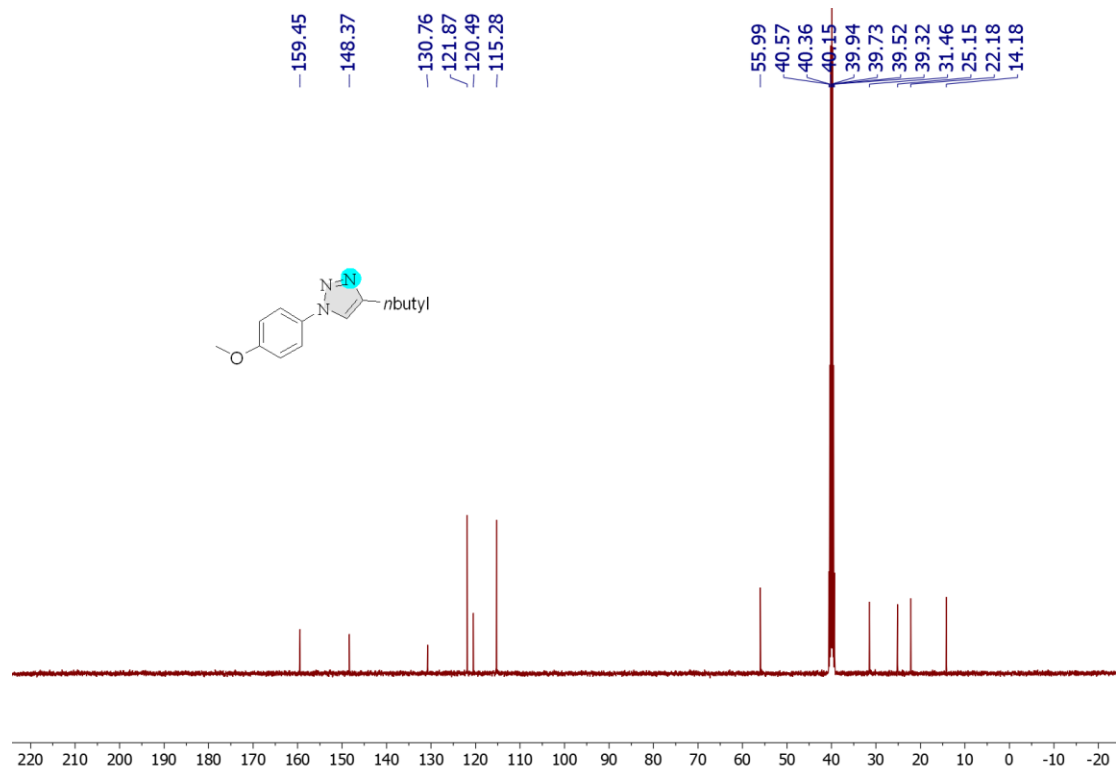

### DEPT of 4-(4-(4-Butylphenyl)-1H-1,2,3-triazol-1-yl)benzonitrile (3y)

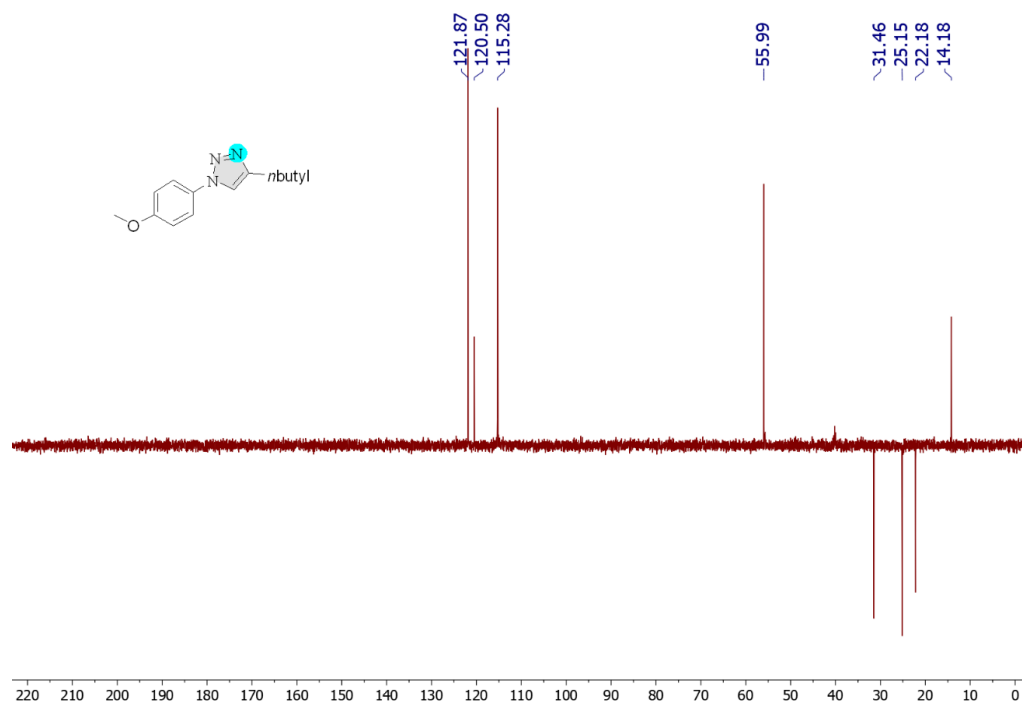

## HRMS of 4-(4-(4-Butylphenyl)-1H-1,2,3-triazol-1-yl)benzotrile (3y)

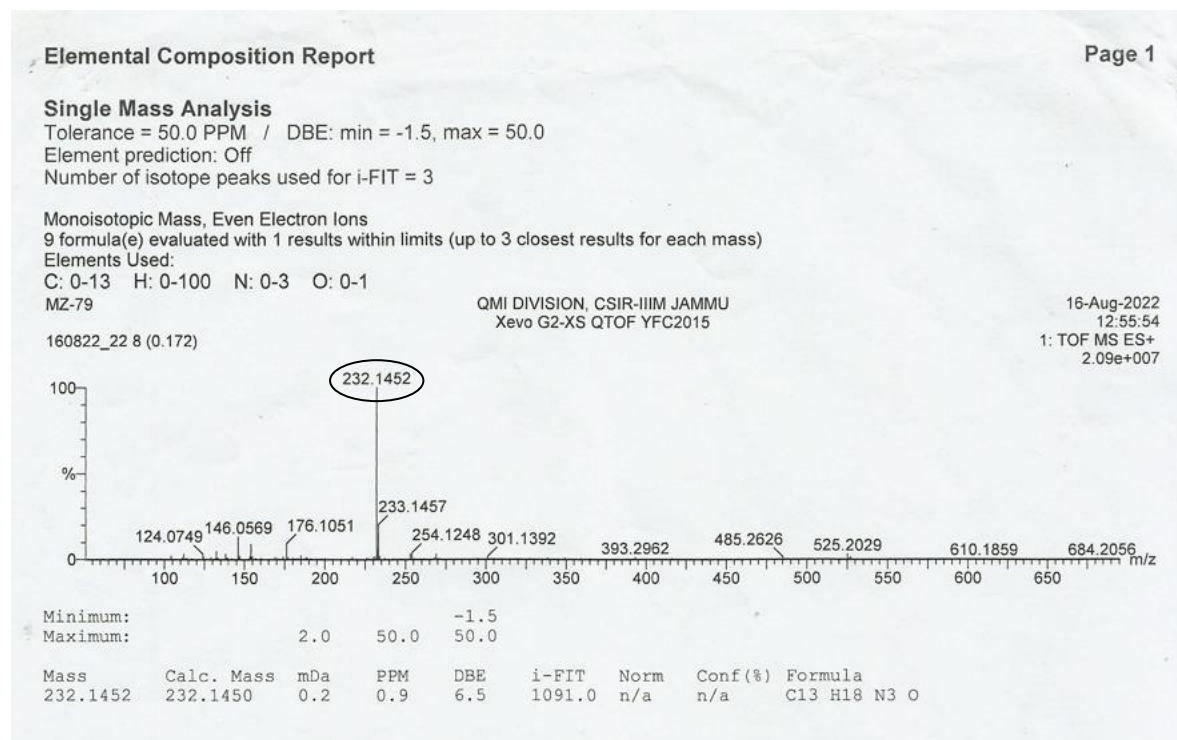

## <sup>1</sup>H-NMR of 4-Butyl-1-(4-fluorophenyl)-4,5-dihydro-1H-1,2,3-triazole (3z)

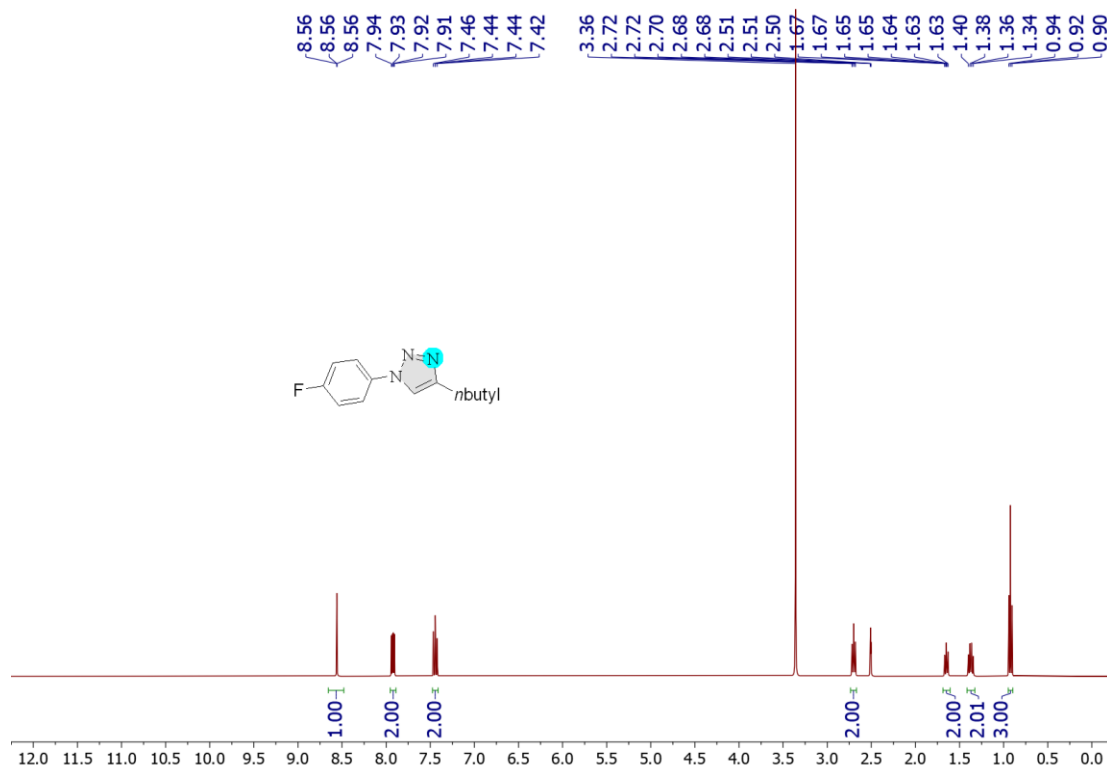

### <sup>13</sup>C-NMR of 4-Butyl-1-(4-fluorophenyl)-4,5-dihydro-1H-1,2,3-triazole (3z)

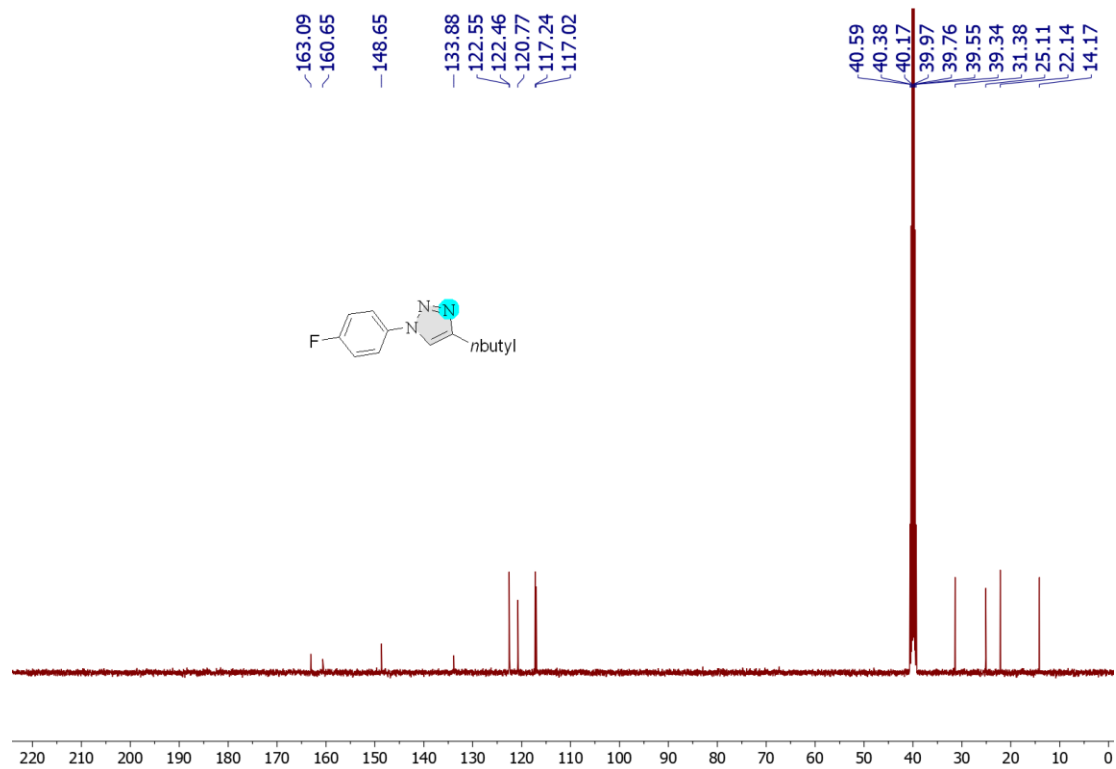

### DEPT of 4-Butyl-1-(4-fluorophenyl)-4,5-dihydro-1H-1,2,3-triazole (3z)

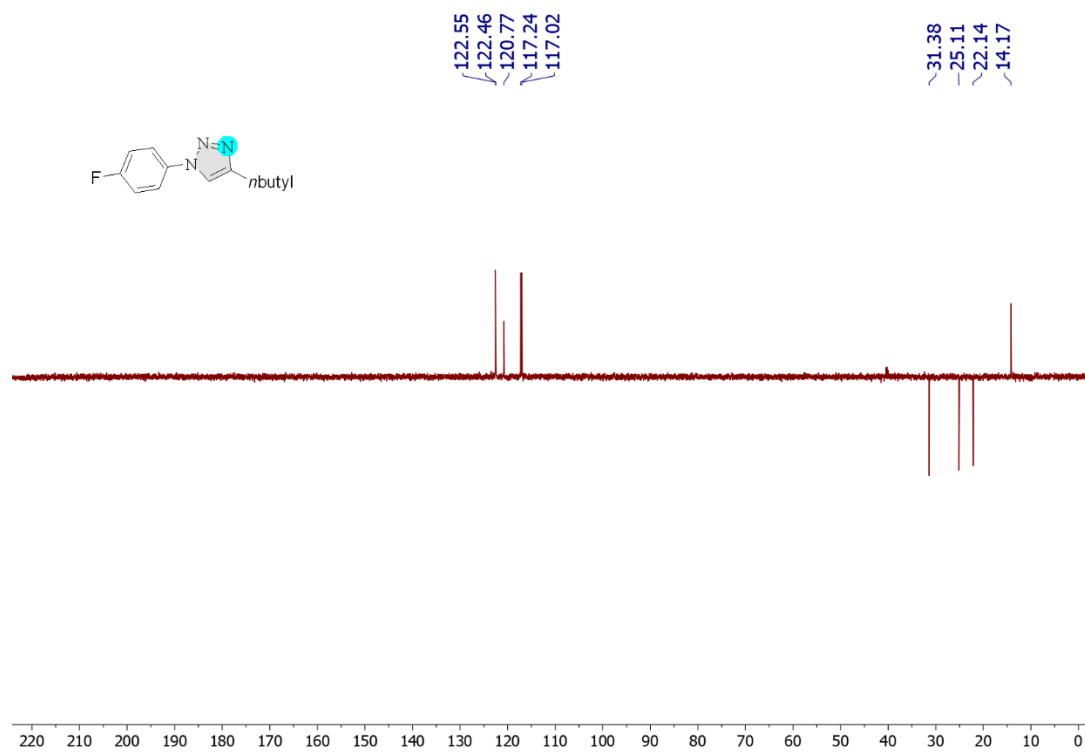

**<sup>19</sup>F-NMR of 4-Butyl-1-(4-fluorophenyl)-4,5-dihydro-1H-1,2,3-triazole (3z)**

-113.72

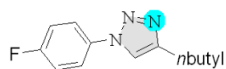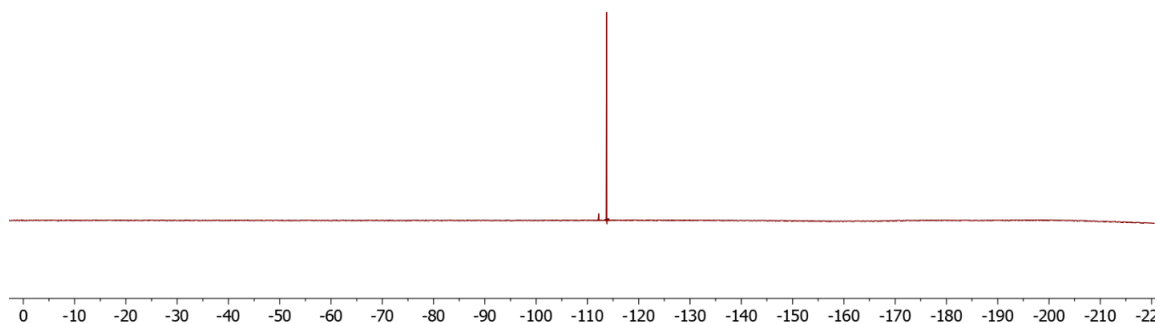

**HRMS of 4-Butyl-1-(4-fluorophenyl)-4,5-dihydro-1H-1,2,3-triazole (3z)**

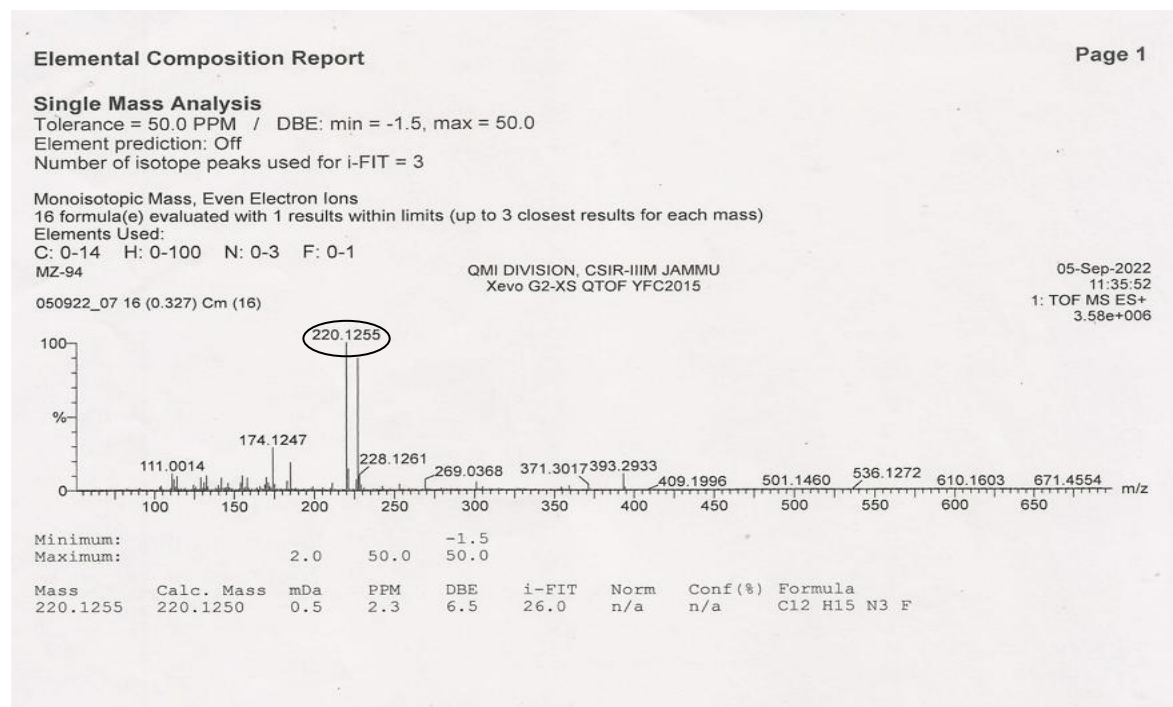

### <sup>1</sup>H-NMR of 4-(4-Butyl-4,5-dihydro-1H-1,2,3-triazol-1-yl)benzotrile (3aa)

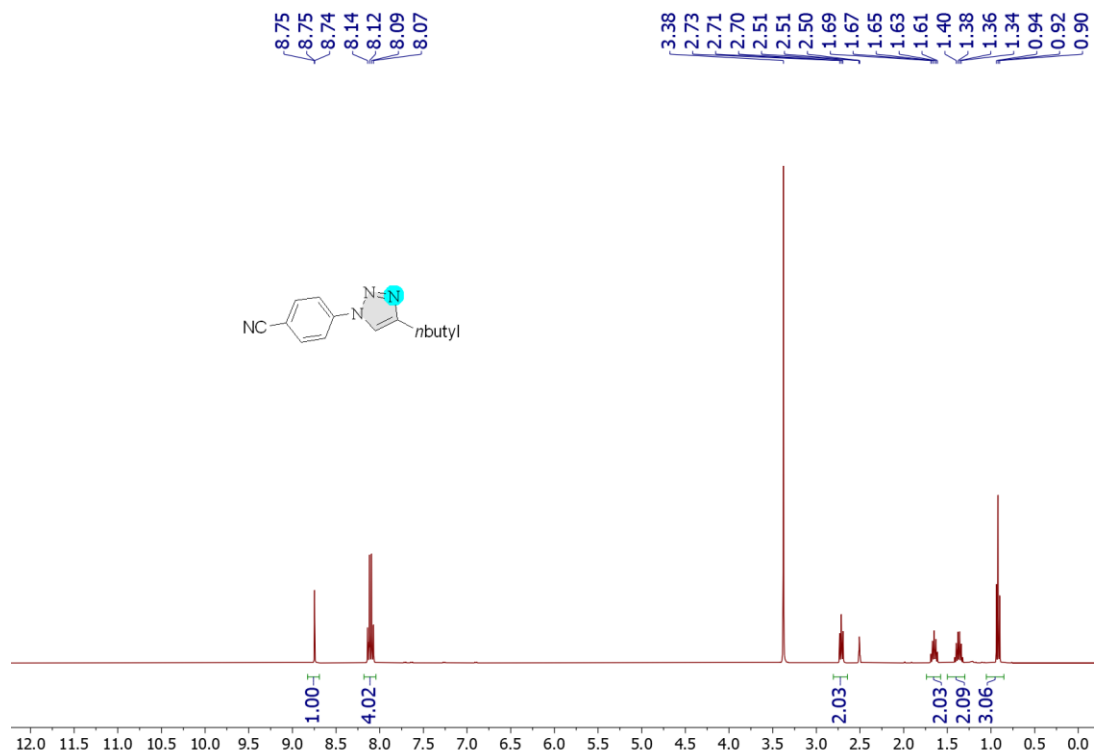

### <sup>13</sup>C-NMR of 4-(4-Butyl-4,5-dihydro-1H-1,2,3-triazol-1-yl)benzotrile (3aa)

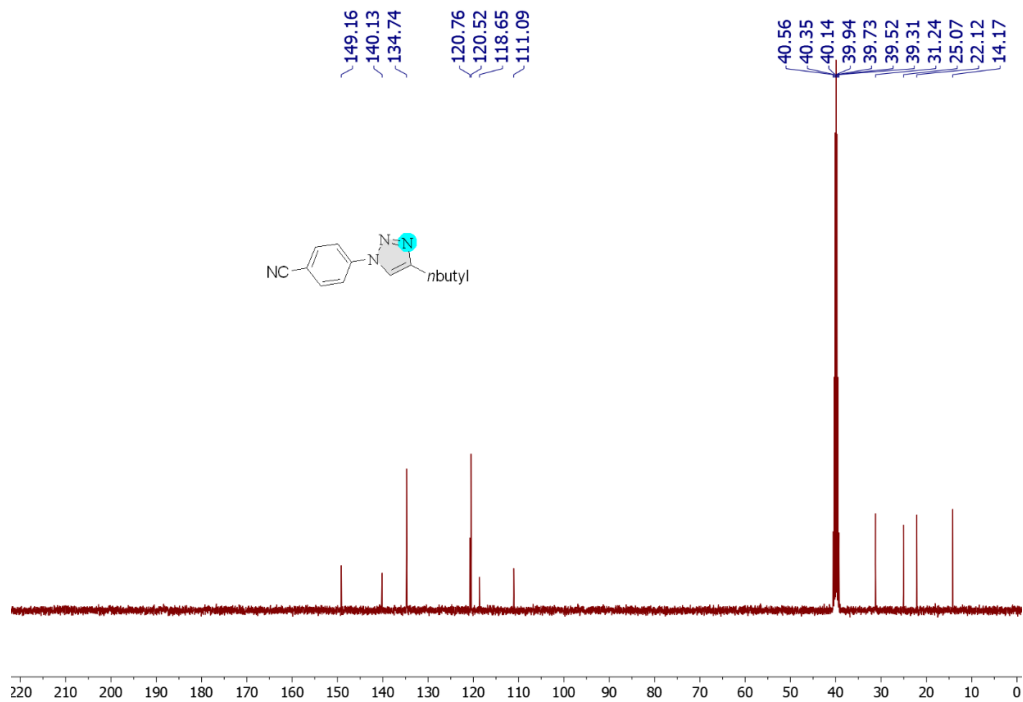

**DEPT of of 4-(4-Butyl-4,5-dihydro-1H-1,2,3-triazol-1-yl)benzotrile (3aa)**

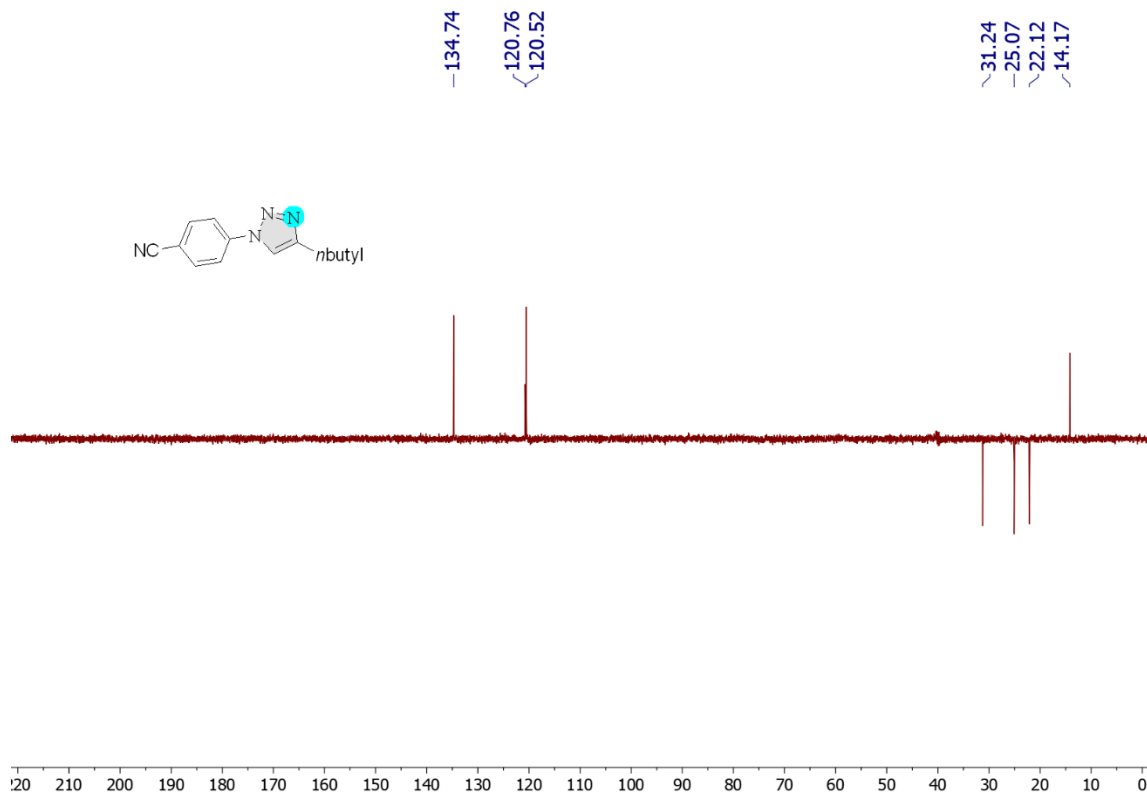

**HRMS of of 4-(4-Butyl-4,5-dihydro-1H-1,2,3-triazol-1-yl)benzotrile (3aa)**

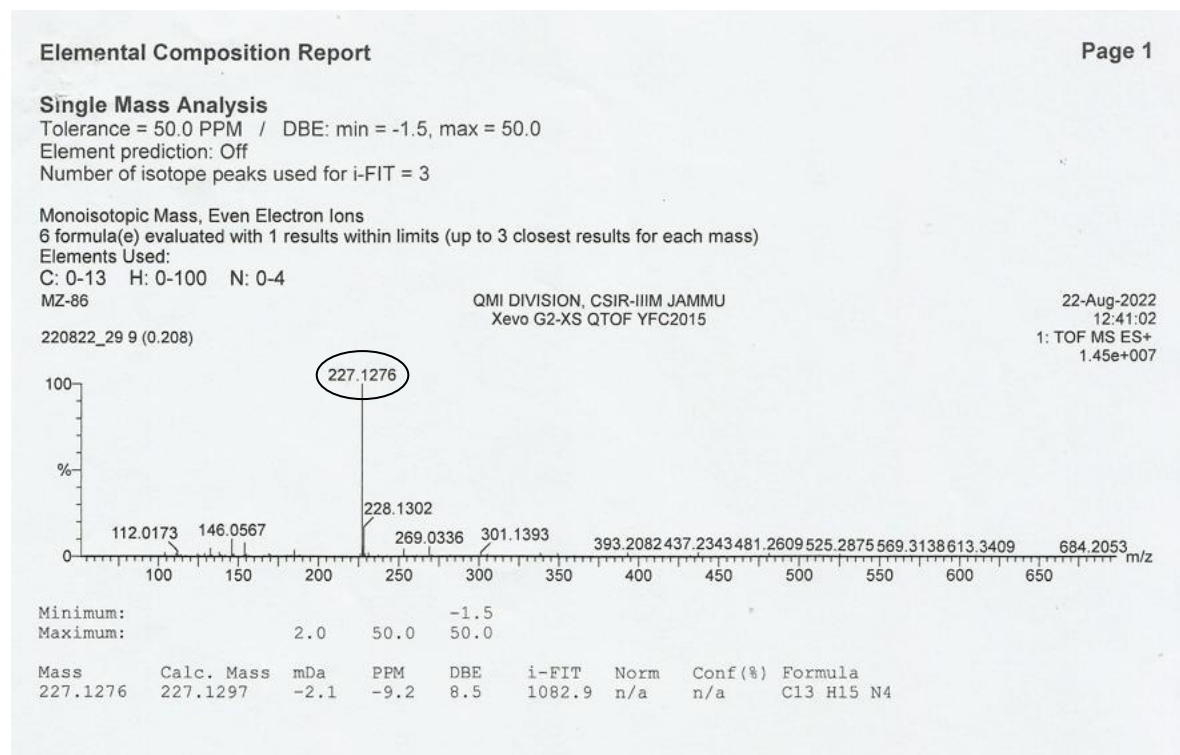

### <sup>1</sup>H-NMR of 1-(1-Phenyl-1*H*-1,2,3-triazol-4-yl)cyclopentan-1-ol (3ab)

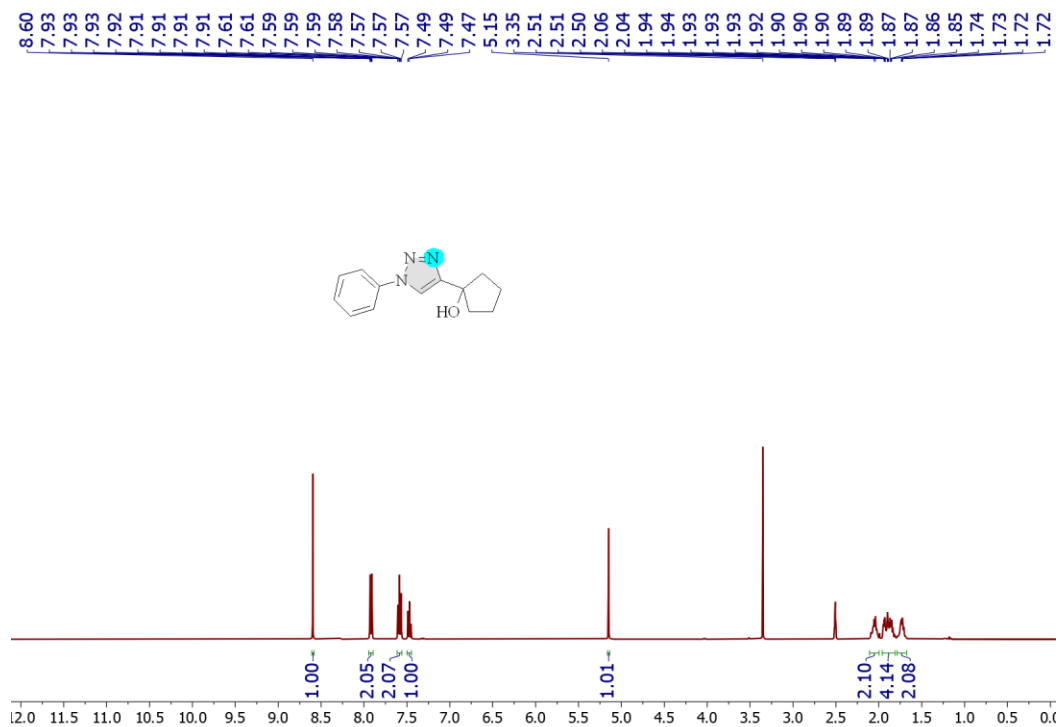

### <sup>13</sup>C-NMR of 1-(1-Phenyl-1*H*-1,2,3-triazol-4-yl)cyclopentan-1-ol (3ab)

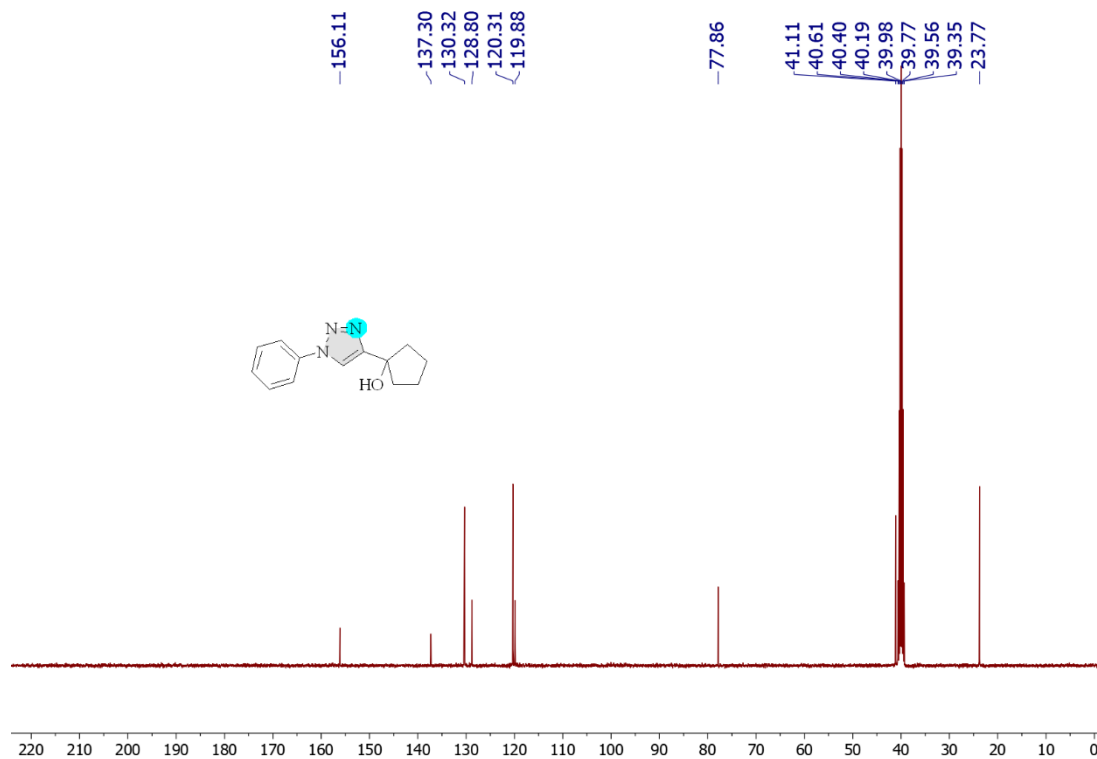

## DEPT of 1-(1-Phenyl-1*H*-1,2,3-triazol-4-yl)cyclopentan-1-ol (3ab)

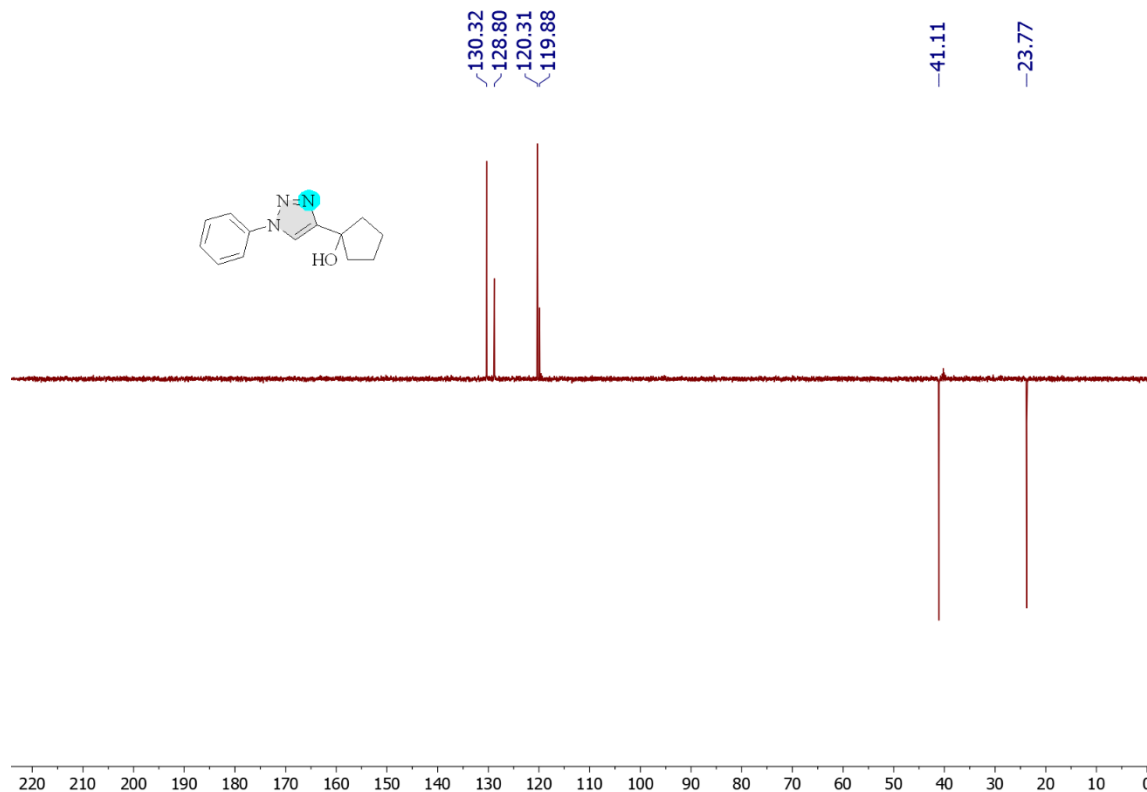

## HRMS of 1-(1-Phenyl-1*H*-1,2,3-triazol-4-yl)cyclopentan-1-ol (3ab)

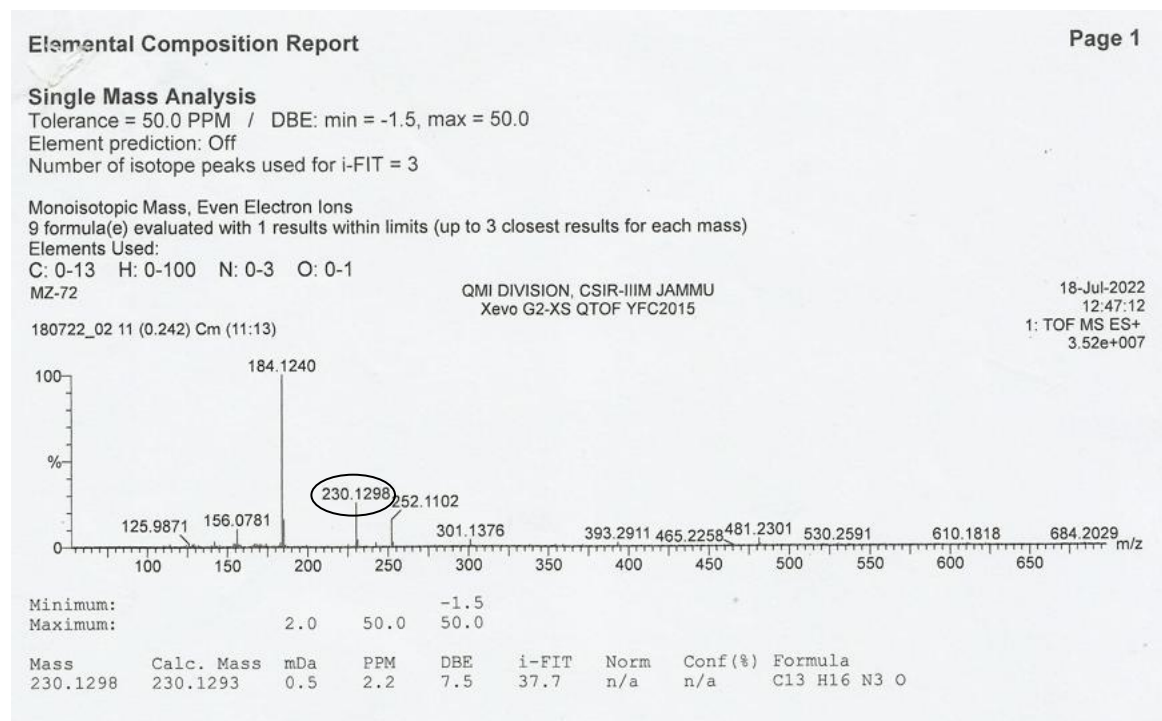

**<sup>1</sup>H-NMR of 1-(1-(4-Methoxyphenyl)-1*H*-1,2,3-triazol-4-yl)cyclopentan-1-ol (3ac)**

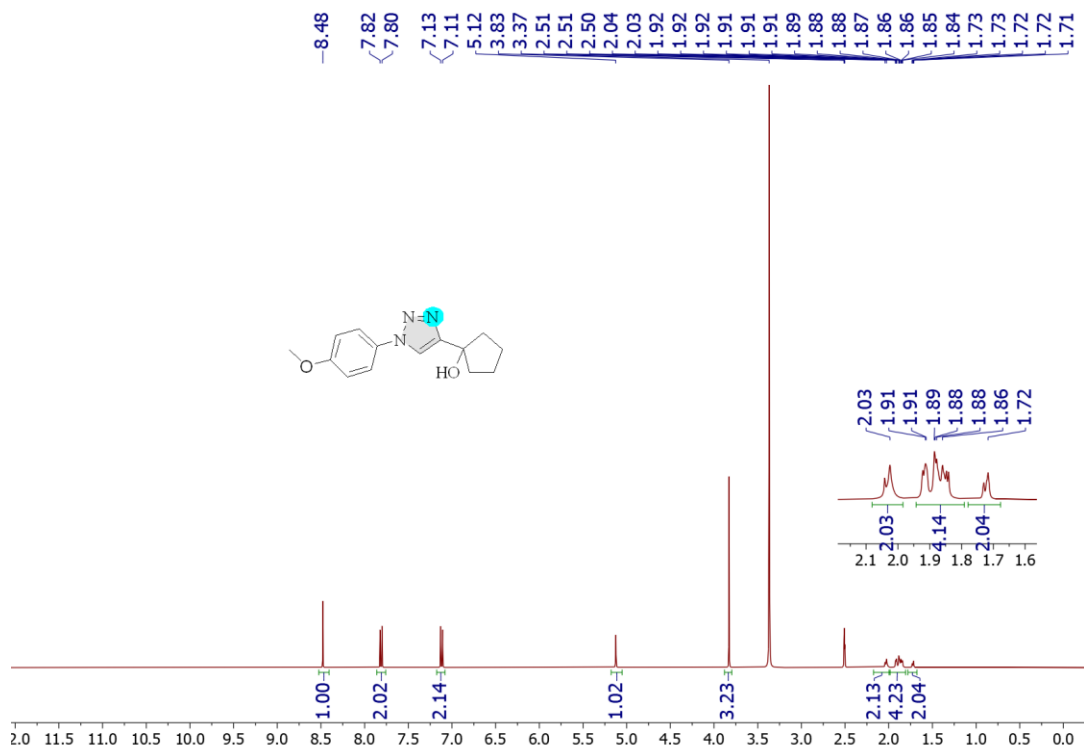

**<sup>13</sup>C NMR of 1-(1-(4-Methoxyphenyl)-1*H*-1,2,3-triazol-4-yl)cyclopentan-1-ol (3ac)**

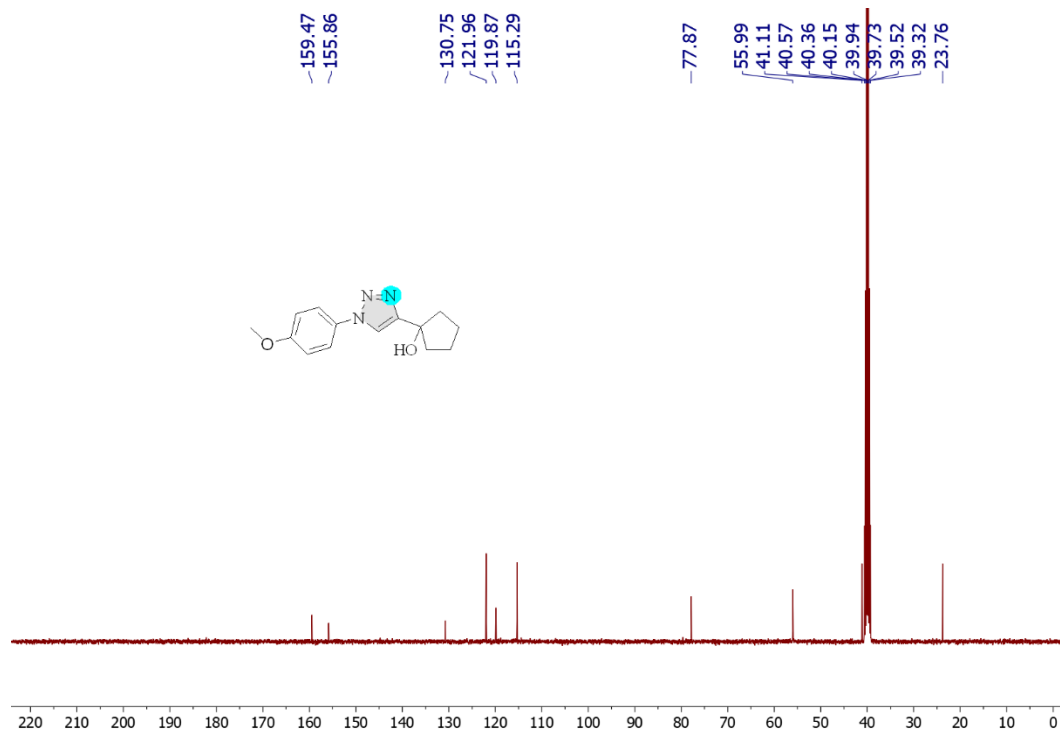

### DEPT of 1-(1-(4-Methoxyphenyl)-1H-1,2,3-triazol-4-yl)cyclopentan-1-ol (3ac)

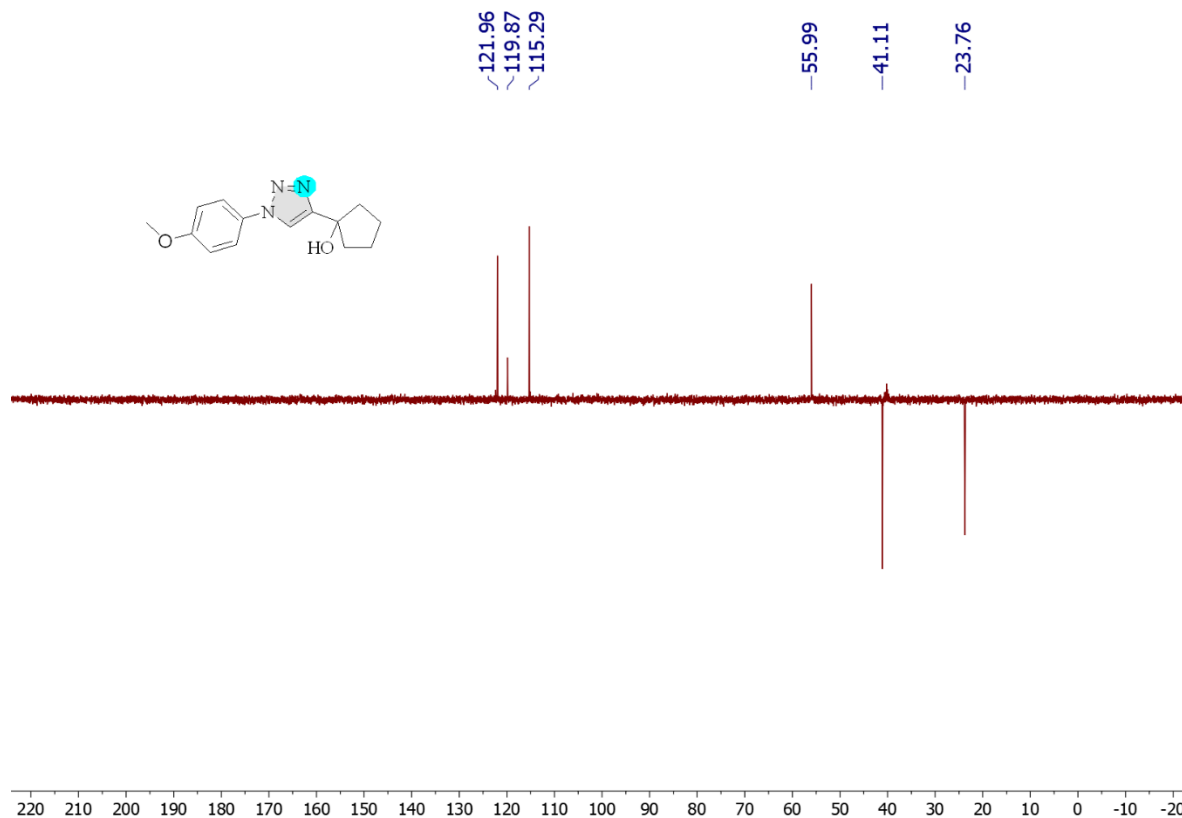

### HRMS of 1-(1-(4-Methoxyphenyl)-1H-1,2,3-triazol-4-yl)cyclopentan-1-ol (3ac)

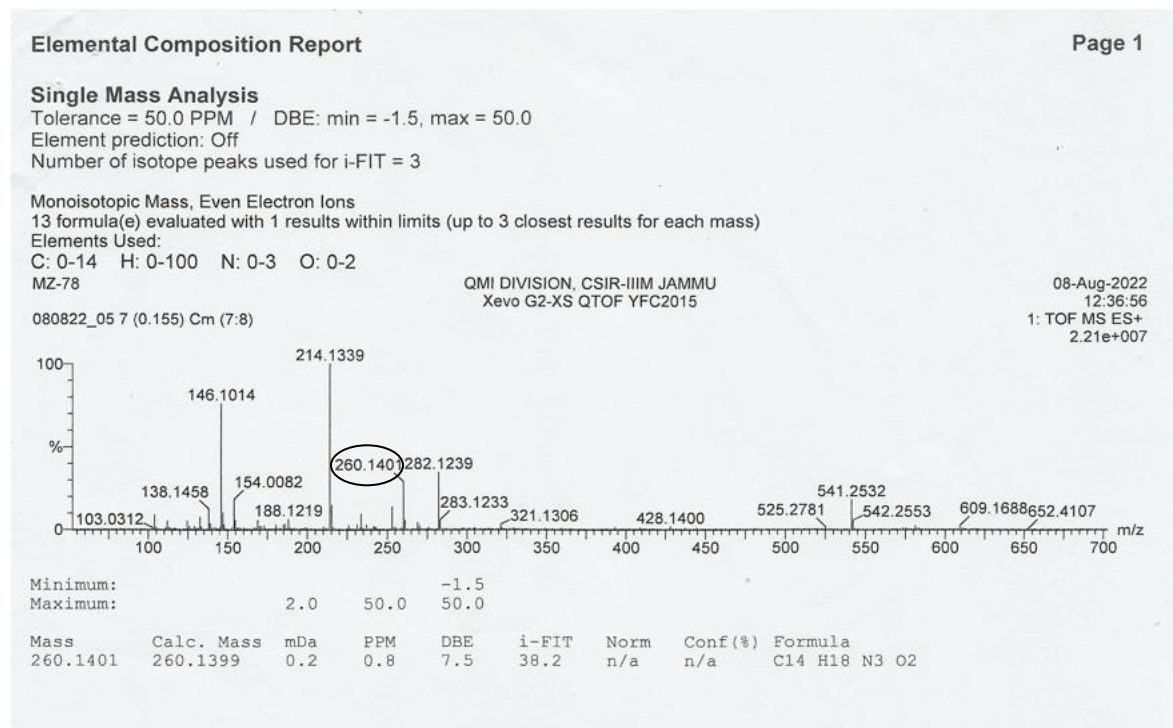

**<sup>1</sup>H-NMR of 2-(4-(*p*-tolyl)-1*H*-1,2,3-triazol-1-yl)benzo[*d*]thiazole (4a)**

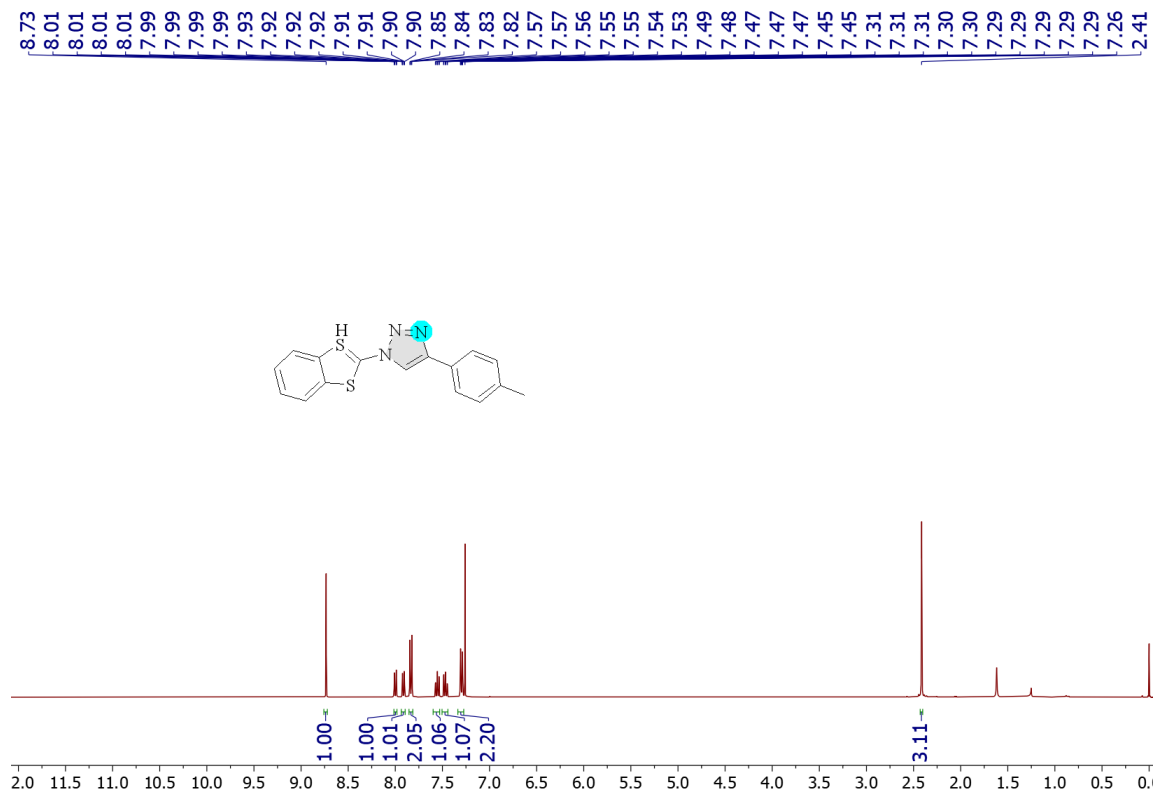

**<sup>13</sup>C-NMR of 2-(4-(*p*-tolyl)-1*H*-1,2,3-triazol-1-yl)benzo[*d*]thiazole (4a)**

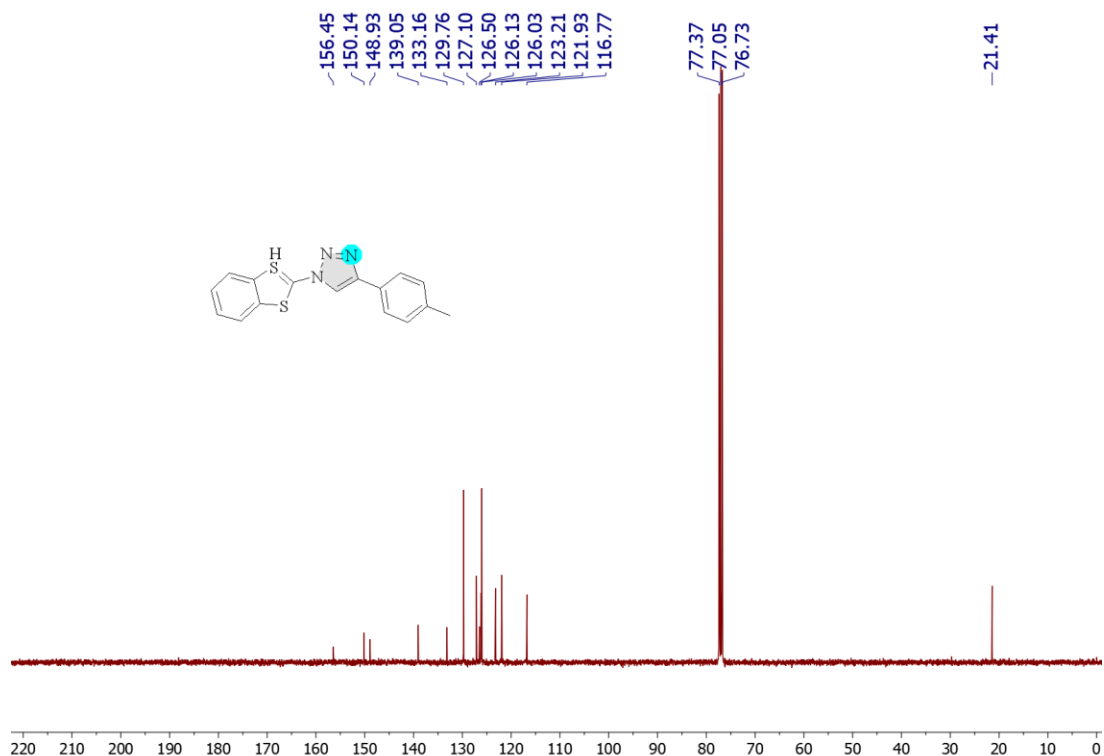

## DEPT of 2-(4-(p-tolyl)-1H-1,2,3-triazol-1-yl)benzo[d]thiazole (4a).

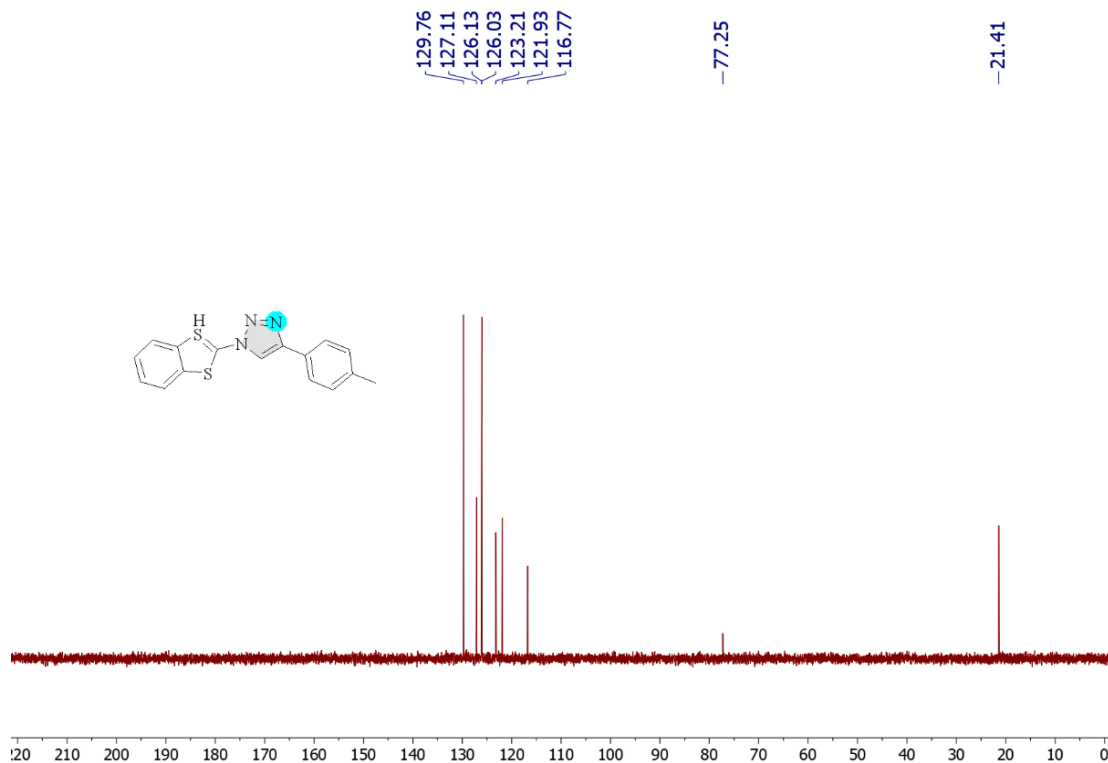

## HRMS of 2-(4-(p-tolyl)-1H-1,2,3-triazol-1-yl)benzo[d]thiazole (4a)

### Elemental Composition Report

Page 1

### Single Mass Analysis

Tolerance = 50.0 PPM / DBE: min = -1.5, max = 50.0

Element prediction: Off

Number of isotope peaks used for i-FIT = 3

Monoisotopic Mass, Even Electron Ions

13 formula(e) evaluated with 1 results within limits (up to 3 closest results for each mass)

Elements Used:

C: 0-16 H: 0-100 N: 0-4 S: 0-1

MZ-4a

QMI DIVISION, CSIR-IIIM JAMMU  
Xevo G2-XS QTOF YFC2015

25-Apr-2024

13:22:18

1: TOF MS ES+

2.00e+007

250424\_04 5 (0.121)

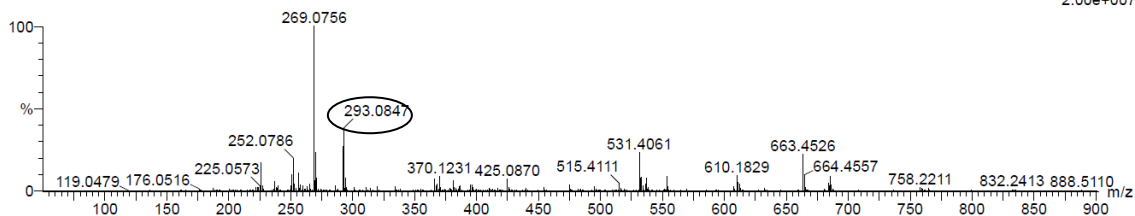

Minimum: -1.5  
Maximum: 50.0

| Mass     | Calc. Mass | mDa  | PPM  | DBE  | i-FIT  | Norm | Conf (%) | Formula      |
|----------|------------|------|------|------|--------|------|----------|--------------|
| 293.0847 | 293.0861   | -1.4 | -4.8 | 12.5 | 1307.9 | n/a  | n/a      | C16 H13 N4 S |

### <sup>1</sup>H-NMR of 2-(4-butyl-1*H*-1,2,3-triazol-1-yl)benzo[*d*]thiazole (4b)

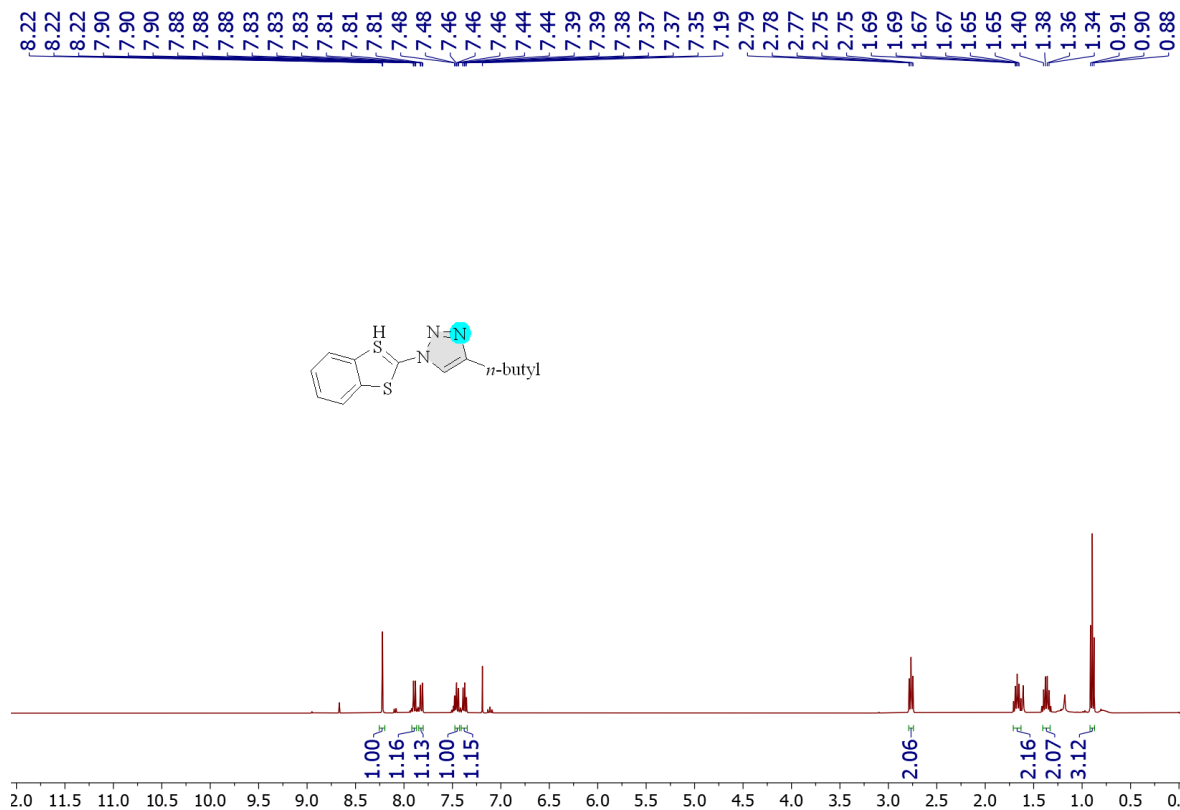

### <sup>13</sup>C-NMR of 2-(4-butyl-1*H*-1,2,3-triazol-1-yl)benzo[*d*]thiazole (4b)

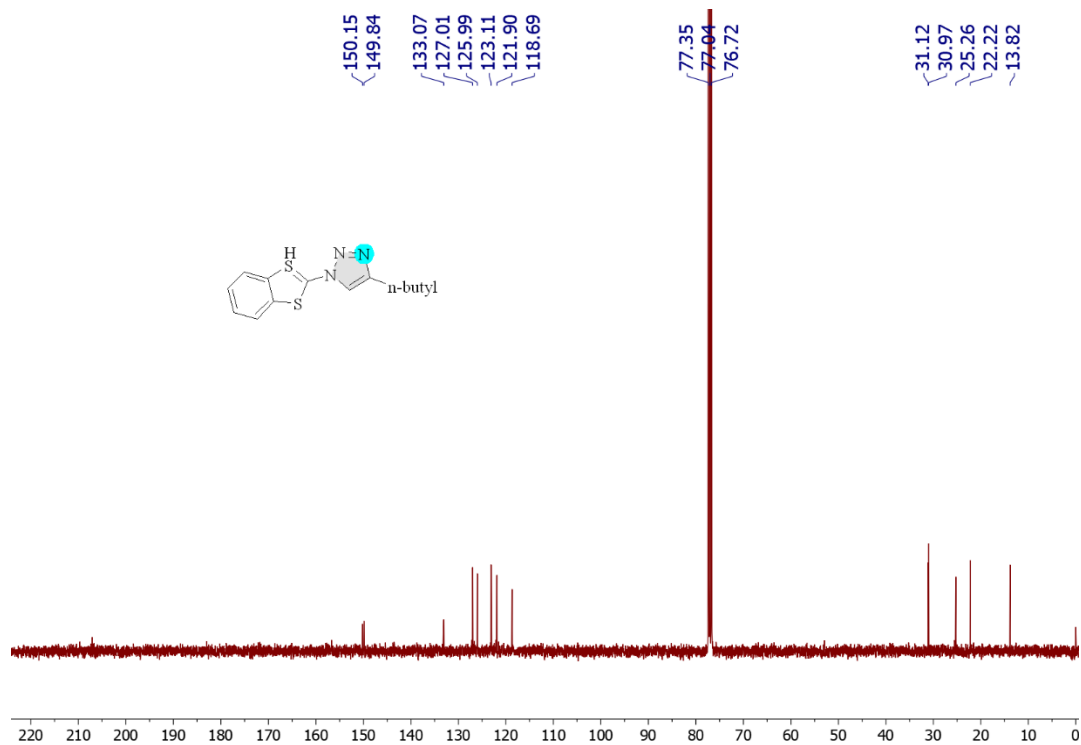

## DEPT of 2-(4-butyl-1*H*-1,2,3-triazol-1-yl)benzo[*d*]thiazole (4b)

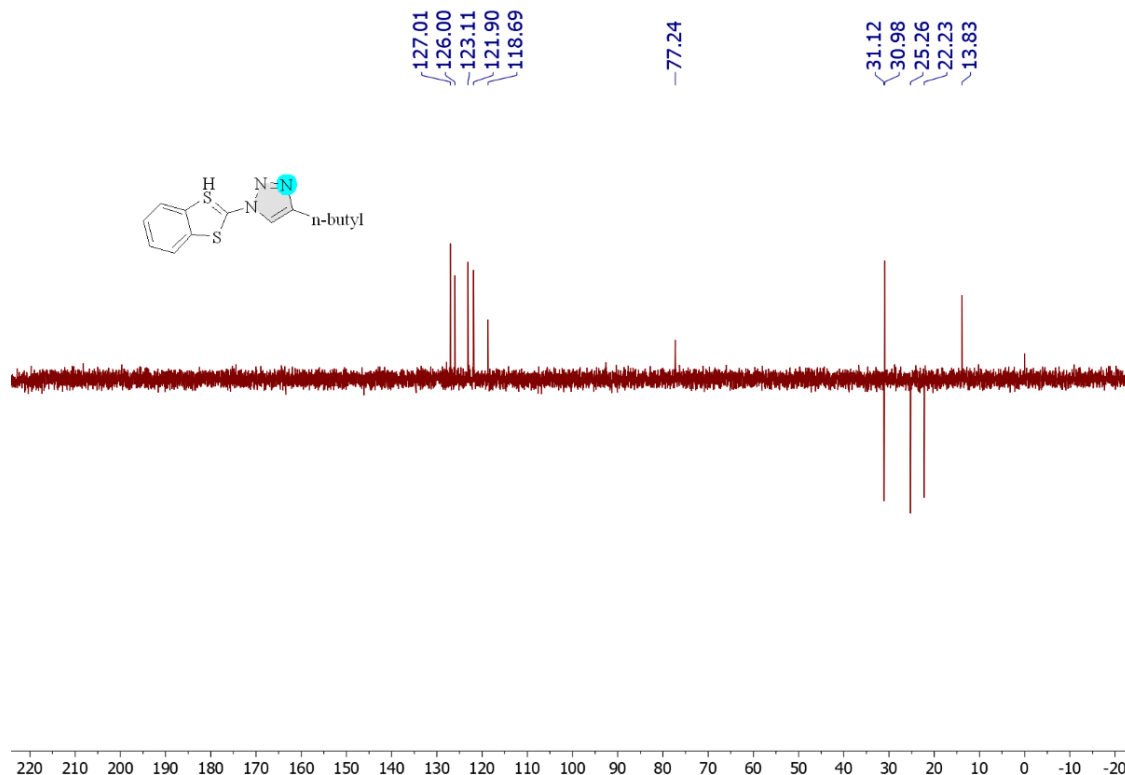

## HRMS 2-(4-butyl-1*H*-1,2,3-triazol-1-yl)benzo[*d*]thiazole (4b)

### Elemental Composition Report

Page 1

#### Single Mass Analysis

Tolerance = 50.0 PPM / DBE: min = -1.5, max = 50.0

Element prediction: Off

Number of isotope peaks used for i-FIT = 3

Monoisotopic Mass, Even Electron Ions

11 formula(e) evaluated with 1 results within limits (up to 3 closest results for each mass)

Elements Used:

C: 0-13 H: 0-100 N: 0-4 S: 0-1

MZ-4b

QMI DIVISION, CSIR-IIIM JAMMU  
Xevo G2-XS QTOF YFC2015

25-Apr-2024

12:17:10

1: TOF MS ES+

7.94e+006

250424\_03 4 (0.104)

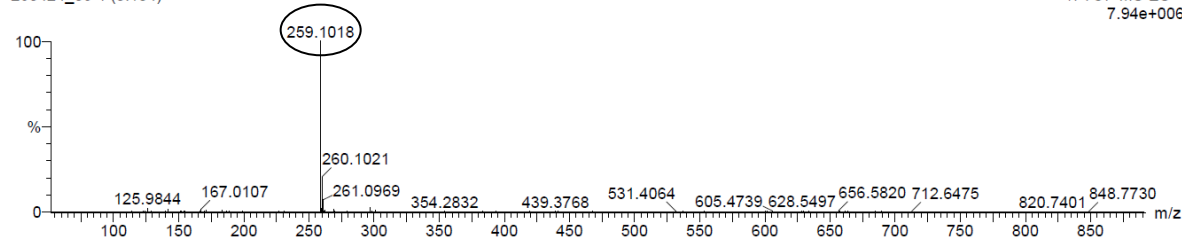

Minimum: -1.5  
Maximum: 50.0

| Mass     | Calc. Mass | mDa | PPM | DBE | i-FIT  | Norm | Conf (%) | Formula      |
|----------|------------|-----|-----|-----|--------|------|----------|--------------|
| 259.1018 | 259.1017   | 0.1 | 0.4 | 8.5 | 1339.2 | n/a  | n/a      | C13 H15 N4 S |

**<sup>1</sup>H-NMR of 2-(4-(4-fluorophenyl)-1H-1,2,3-triazol-1-yl)benzo[d]thiazole (4c)**

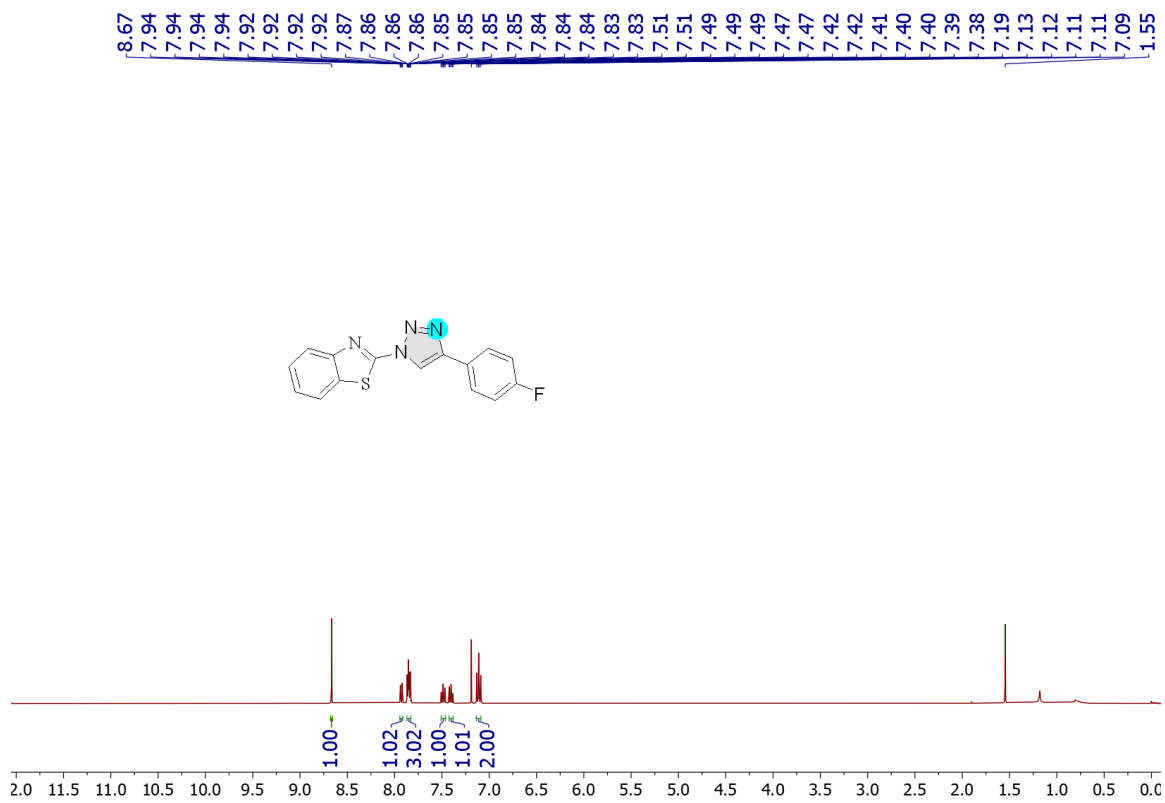

**<sup>13</sup>C-NMR of 2-(4-(4-fluorophenyl)-1H-1,2,3-triazol-1-yl)benzo[d]thiazole (4c)**

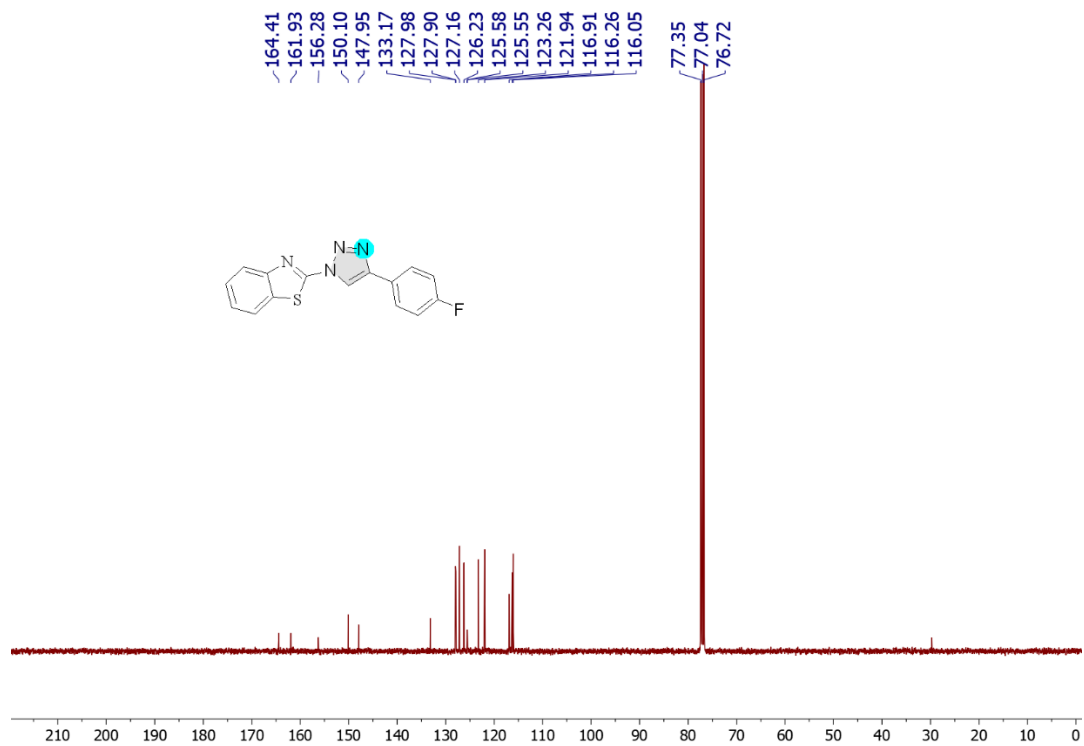

DEPT of 2-(4-(4-fluorophenyl)-1*H*-1,2,3-triazol-1-yl)benzo[*d*]thiazole (4c)

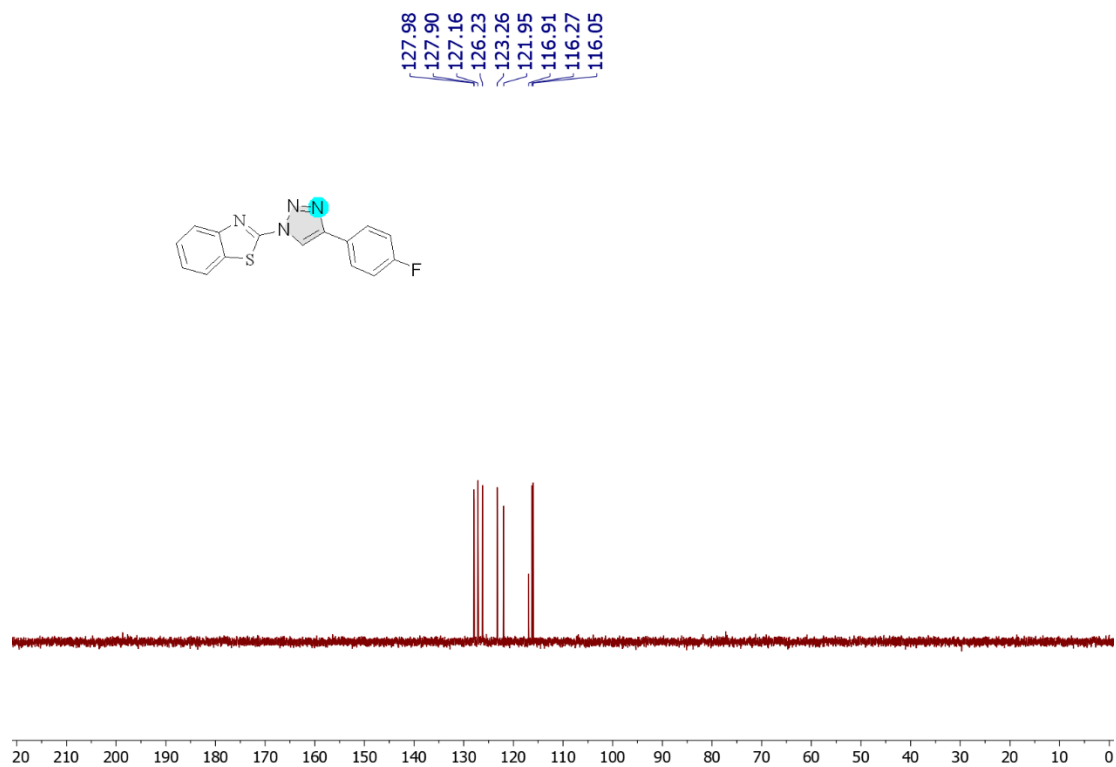

<sup>19</sup>F-NMR of 2-(4-(4-fluorophenyl)-1*H*-1,2,3-triazol-1-yl)benzo[*d*]thiazole (4c)

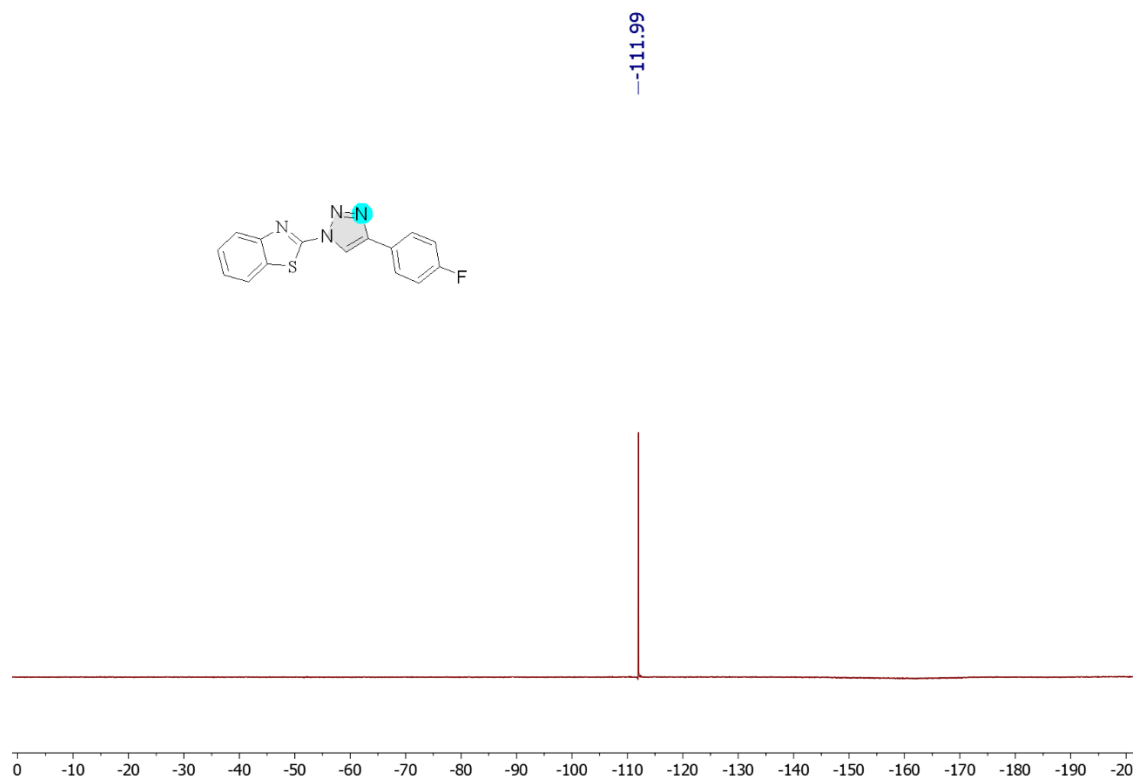

# HRMS of 2-(4-(4-fluorophenyl)-1*H*-1,2,3-triazol-1-yl)benzo[*d*]thiazole (4c)

## Elemental Composition Report

Page 1

### Single Mass Analysis

Tolerance = 100.0 PPM / DBE: min = -1.5, max = 50.0

Element prediction: Off

Number of isotope peaks used for i-FIT = 3

Monoisotopic Mass, Even Electron Ions

24 formula(e) evaluated with 1 results within limits (up to 3 closest results for each mass)

Elements Used:

C: 0-15 H: 0-100 N: 0-4 F: 0-1 S: 0-1

MS-Het-F(N)

QMI DIVISION, CSIR-IIIM JAMMU  
Xevo G2-XS QTOF YFC2015

30-Apr-2024

12:08:33

1: TOF MS ES+

2.29e+007

300424\_13 5 (0.121)

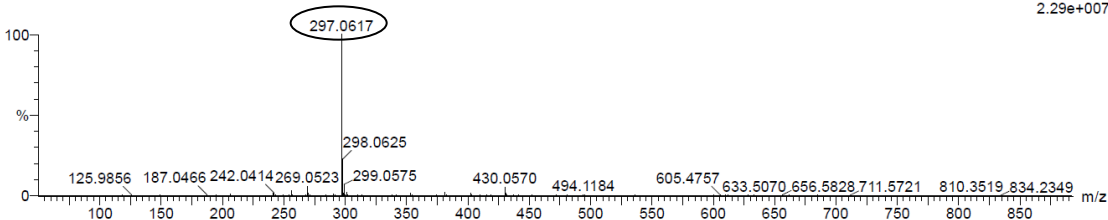

Minimum: -1.5  
Maximum: 2.0 100.0 50.0

| Mass     | Calc. Mass | mDa | PPM | DBE  | i-FIT  | Norm | Conf (%) | Formula        |
|----------|------------|-----|-----|------|--------|------|----------|----------------|
| 297.0617 | 297.0610   | 0.7 | 2.4 | 12.5 | 1207.1 | n/a  | n/a      | C15 H10 N4 F S |

# <sup>1</sup>H-NMR of 2-(1-Phenyl-1*H*-1,2,3-triazol-4-yl)pyridine (4d)

8.65  
8.63  
8.62  
8.28  
8.26  
7.84  
7.83  
7.82  
7.81  
7.81  
7.81  
7.58  
7.57  
7.57  
7.56  
7.56  
7.55  
7.54  
7.54  
7.54  
7.49  
7.48  
7.48  
7.47  
7.46  
7.46  
7.44  
7.44  
7.30  
7.30  
7.29  
7.28  
7.28  
7.27  
7.27  
7.26

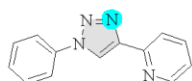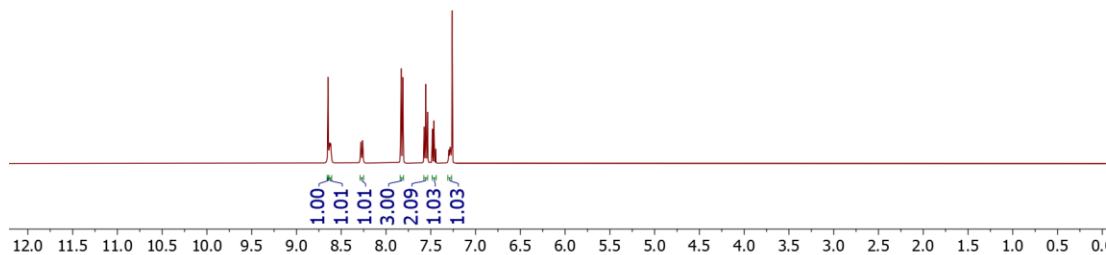

### <sup>13</sup>C-NMR of 2-(1-Phenyl-1*H*-1,2,3-triazol-4-yl)pyridine (4d)

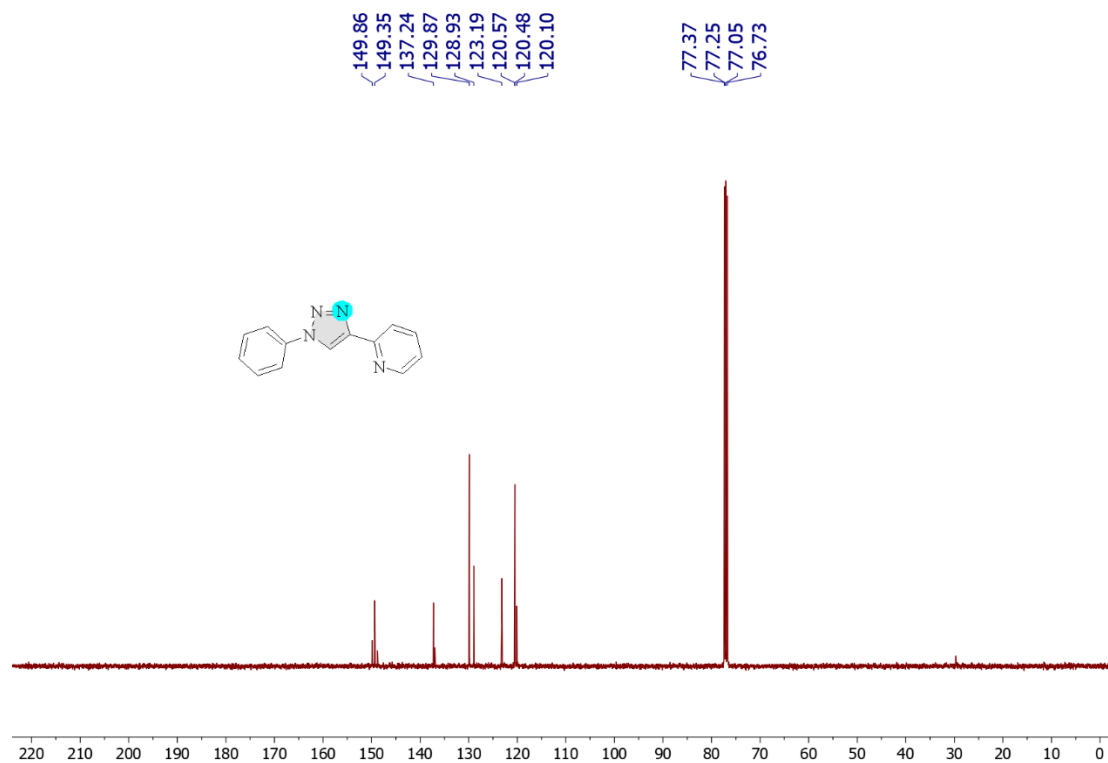

### DEPT of 2-(1-Phenyl-1*H*-1,2,3-triazol-4-yl)pyridine (4d)

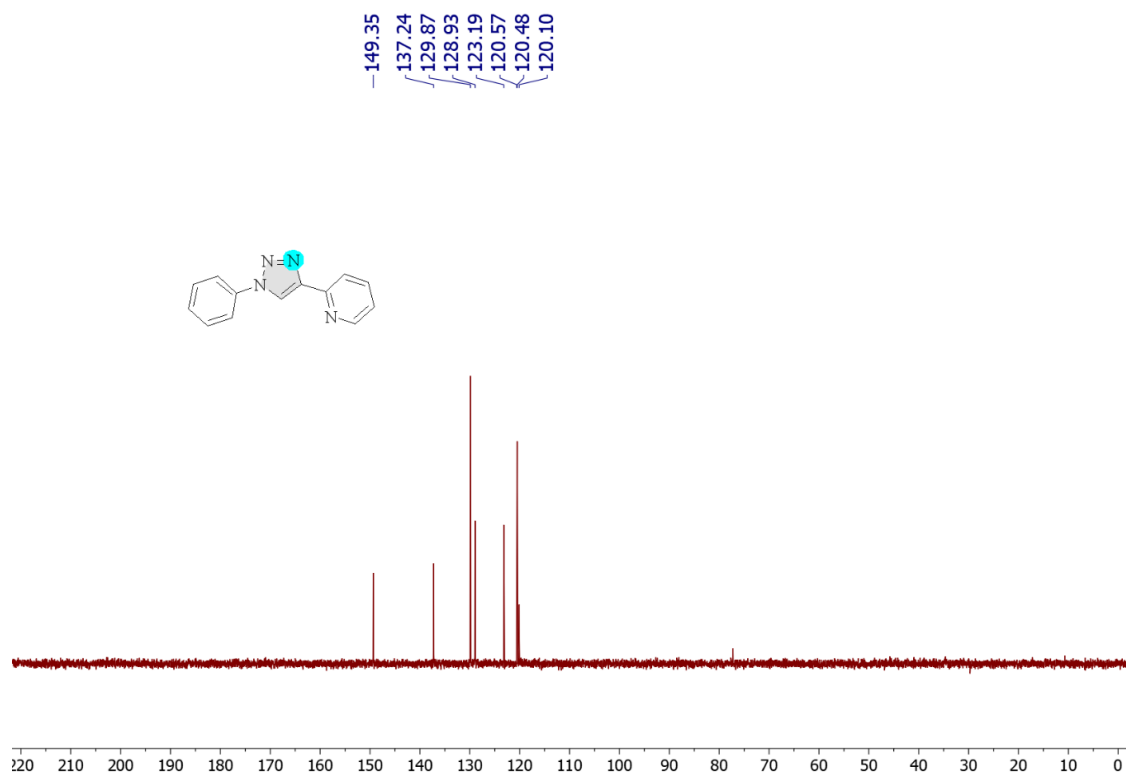

## HRMS of 2-(1-Phenyl-1*H*-1,2,3-triazol-4-yl)pyridine (4d)

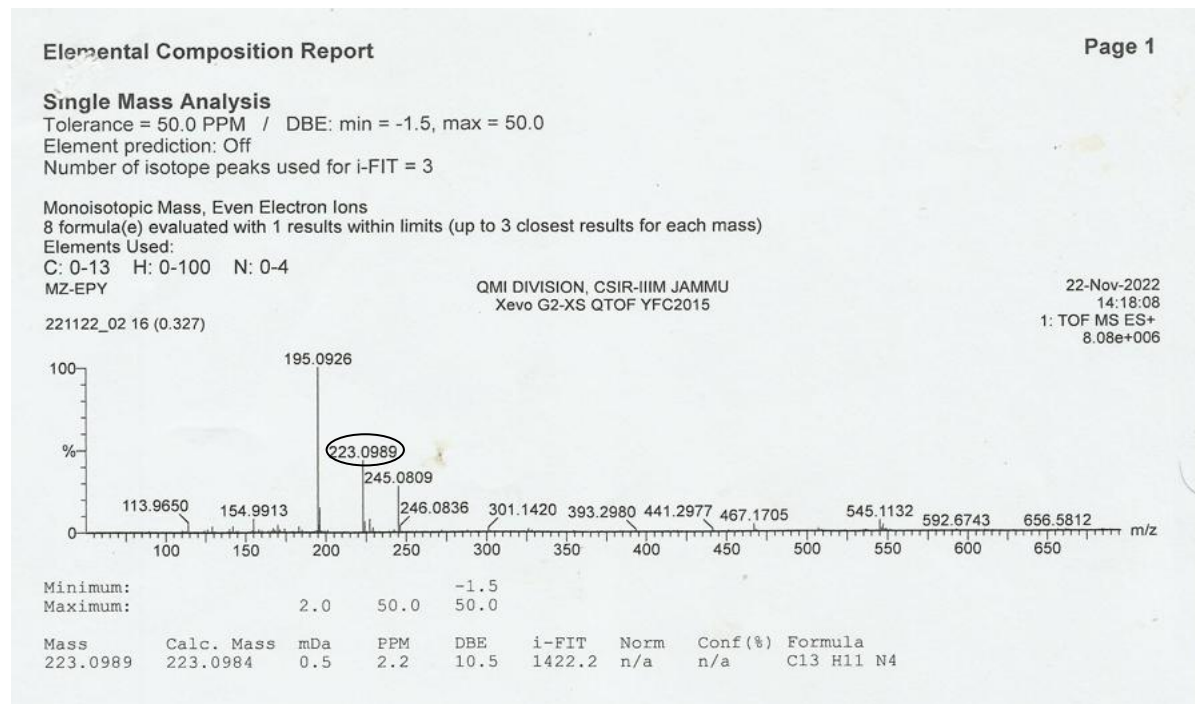

## <sup>1</sup>H-NMR of 1-Phenyl-4-(thiophen-2-yl)-1*H*-1,2,3-triazole (4e)

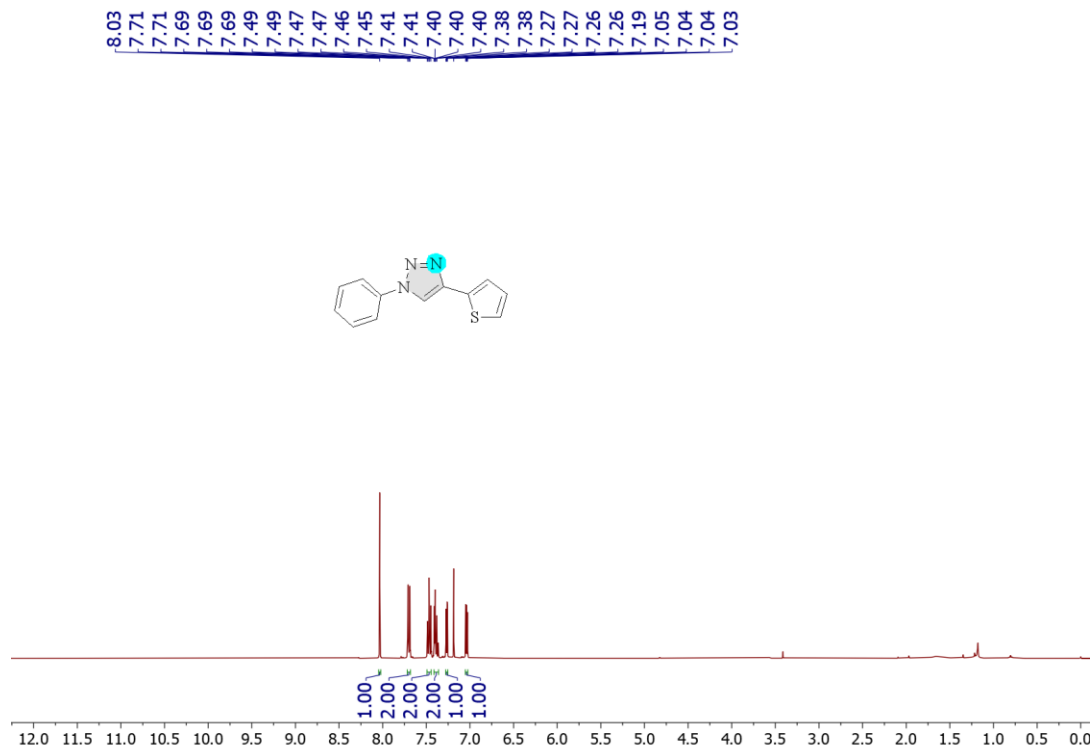

### <sup>13</sup>C-NMR of 1-Phenyl-4-(thiophen-2-yl)-1*H*-1,2,3-triazole (4e)

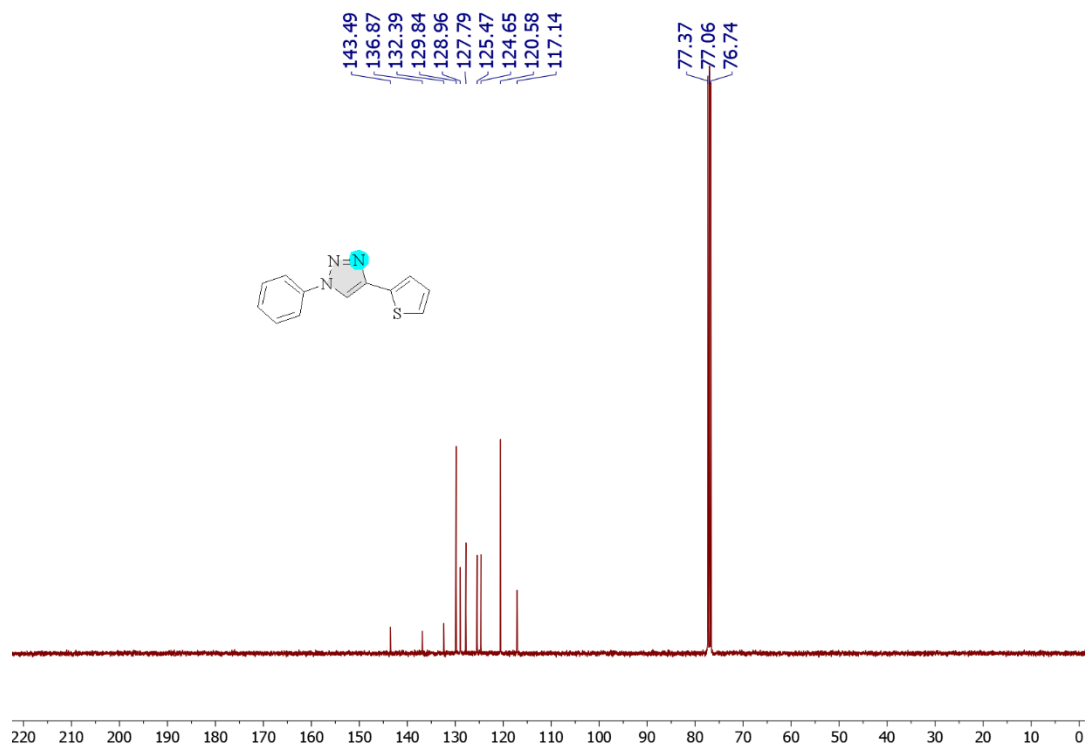

### DEPT of 1-Phenyl-4-(thiophen-2-yl)-1*H*-1,2,3-triazole (4e)

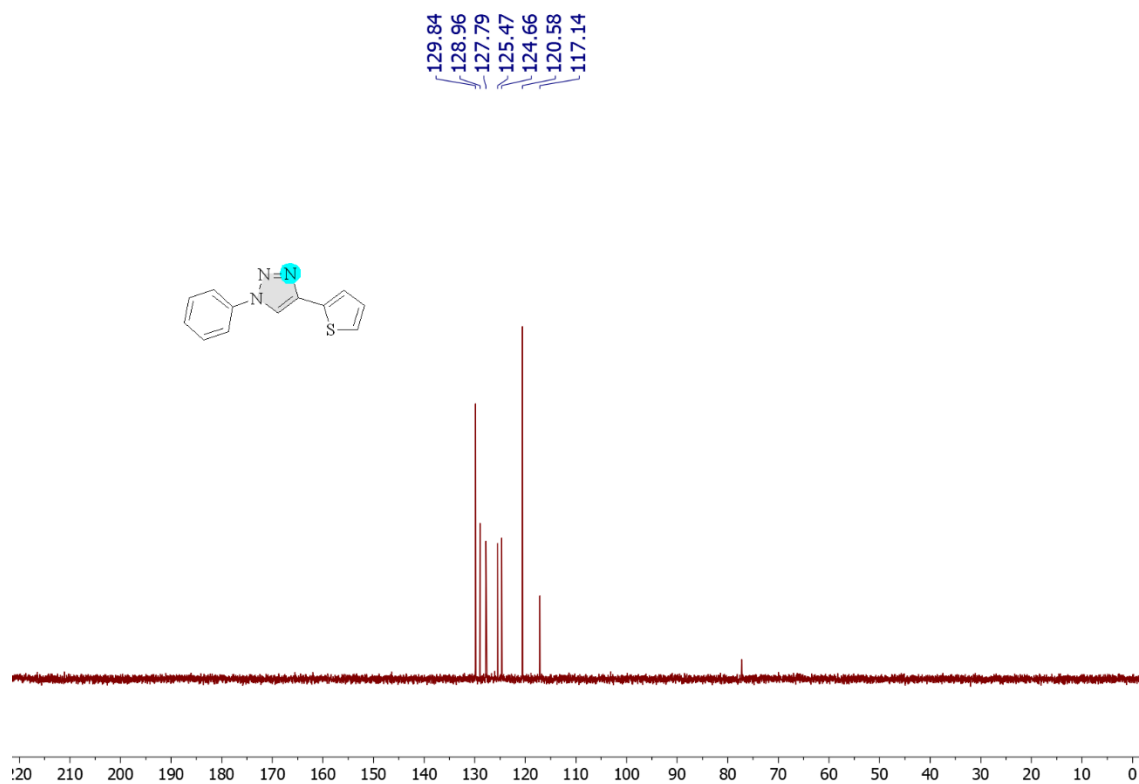

## HRMS of 1-Phenyl-4-(thiophen-2-yl)-1H-1,2,3-triazole (4e)

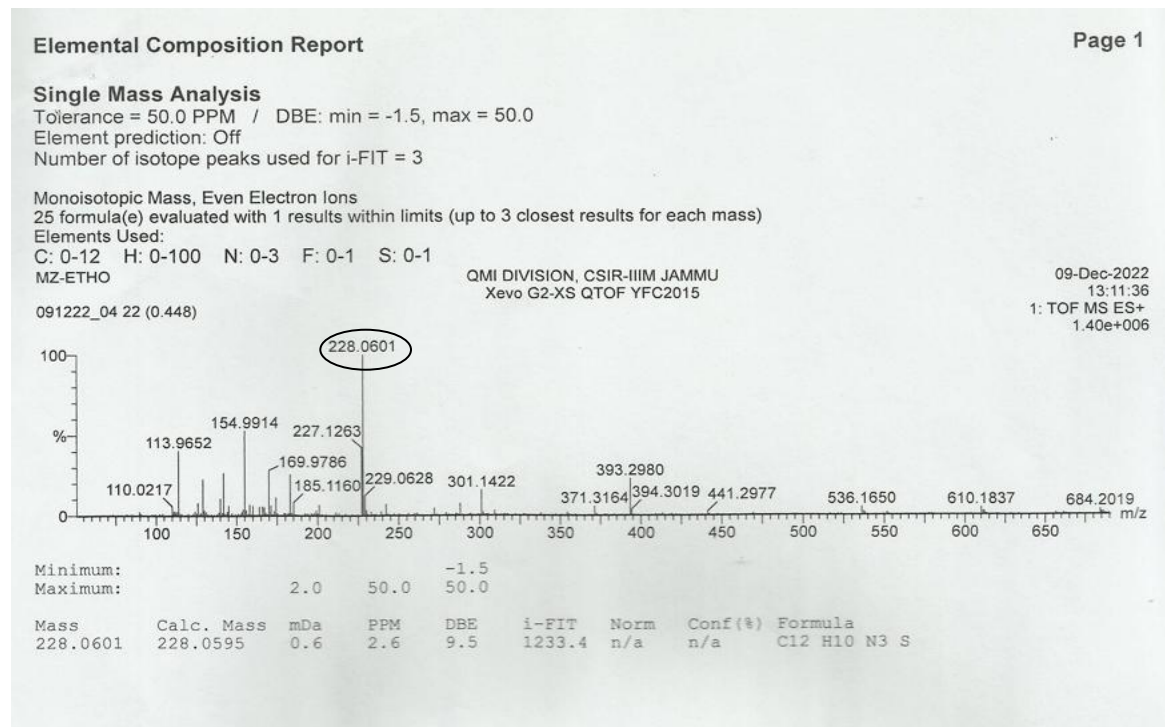

## <sup>1</sup>H-NMR of 1-(4-Fluorophenyl)-4-(thiophen-2-yl)-1H-1,2,3-triazole (4f)

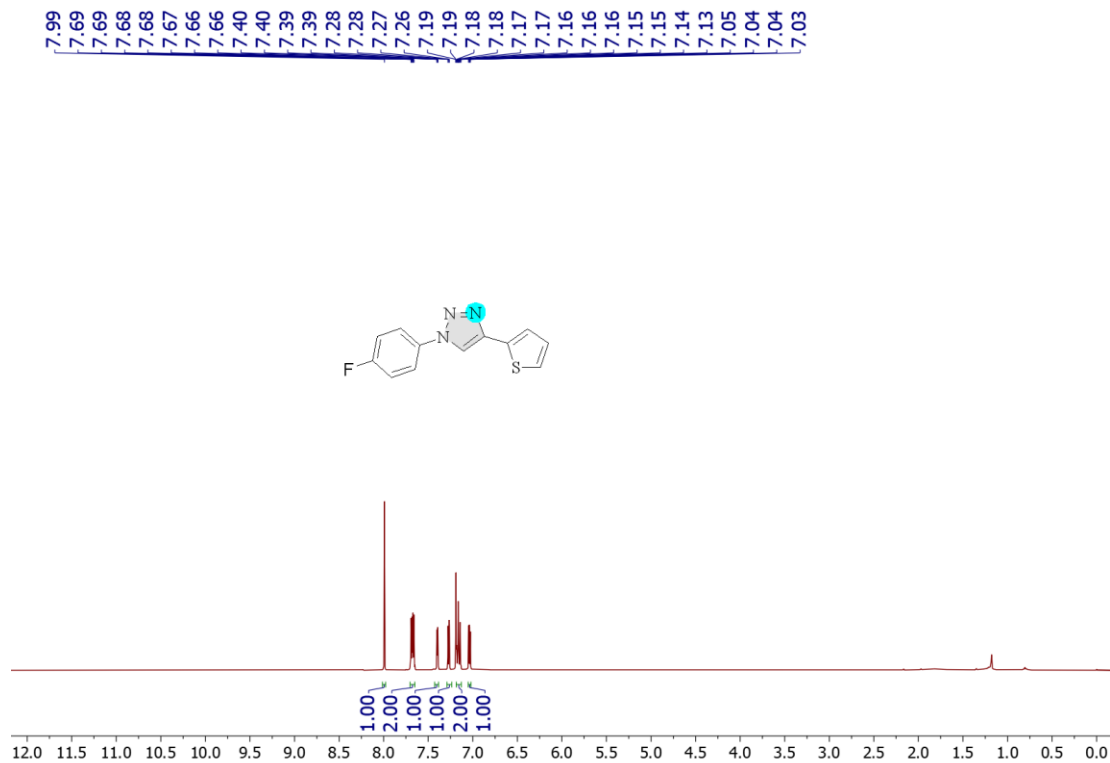

**<sup>13</sup>C-NMR of 1-(4-Fluorophenyl)-4-(thiophen-2-yl)-1*H*-1,2,3-triazole (4f)**

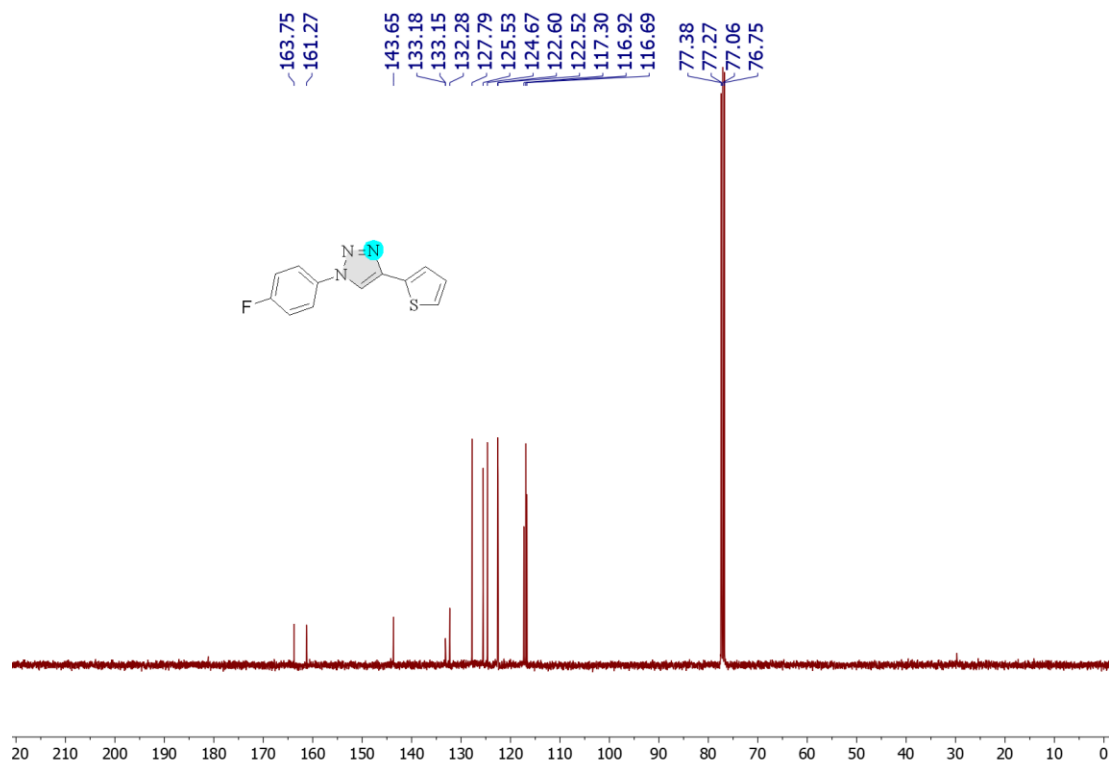

**DEPT of 1-(4-Fluorophenyl)-4-(thiophen-2-yl)-1*H*-1,2,3-triazole (4f)**

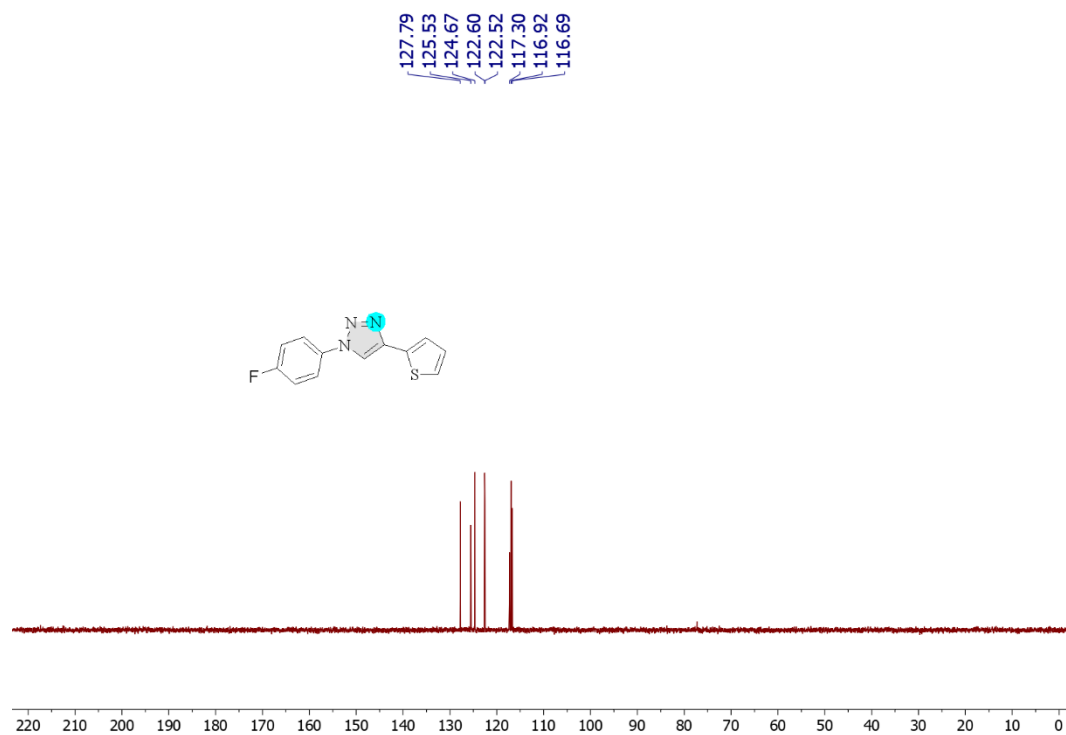

# <sup>19</sup>F-NMR of 1-(4-Fluorophenyl)-4-(thiophen-2-yl)-1H-1,2,3-triazole (4f)

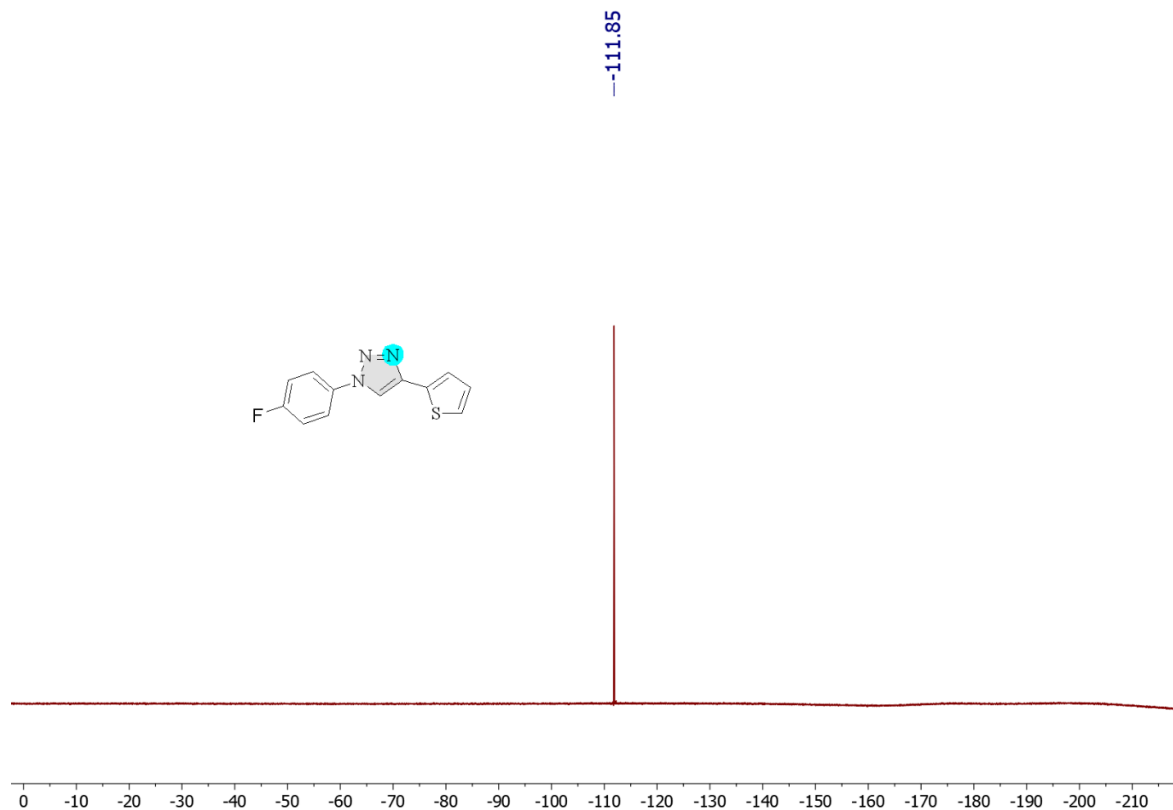

## HRMS of 1-(4-Fluorophenyl)-4-(thiophen-2-yl)-1H-1,2,3-triazole (4f)

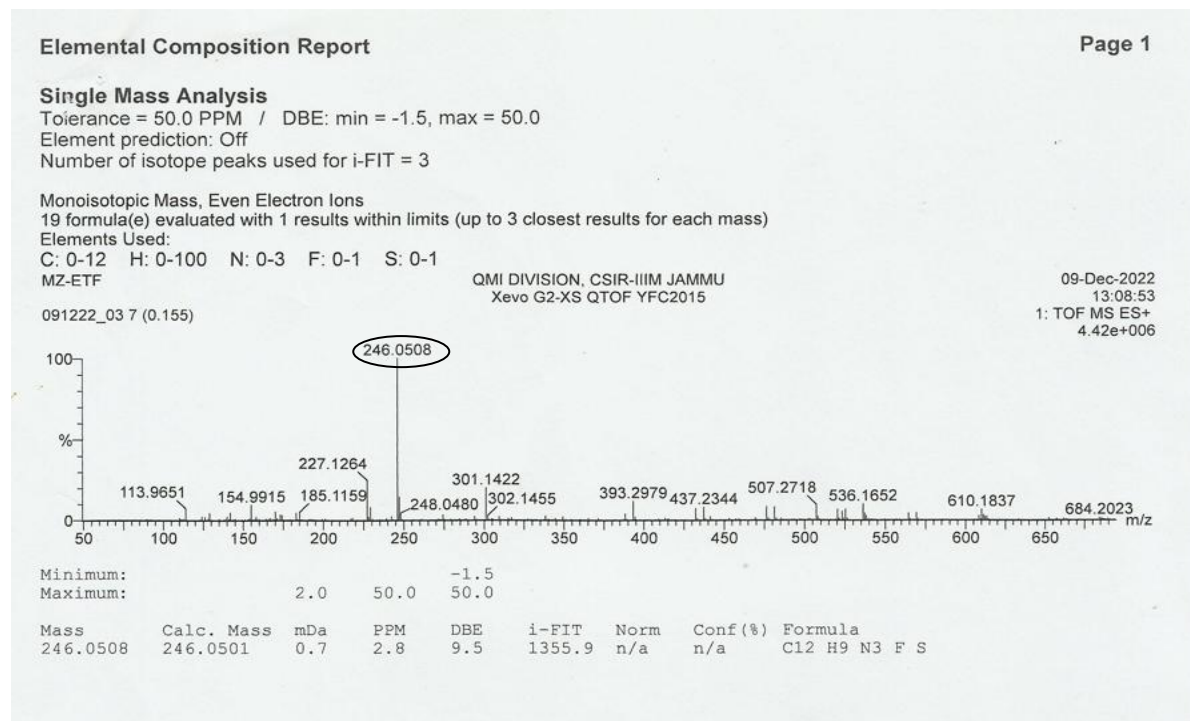

**<sup>1</sup>H-NMR of N-((1-phenyl-1H-1,2,3-triazol-4-yl)methyl)aniline (5a)**

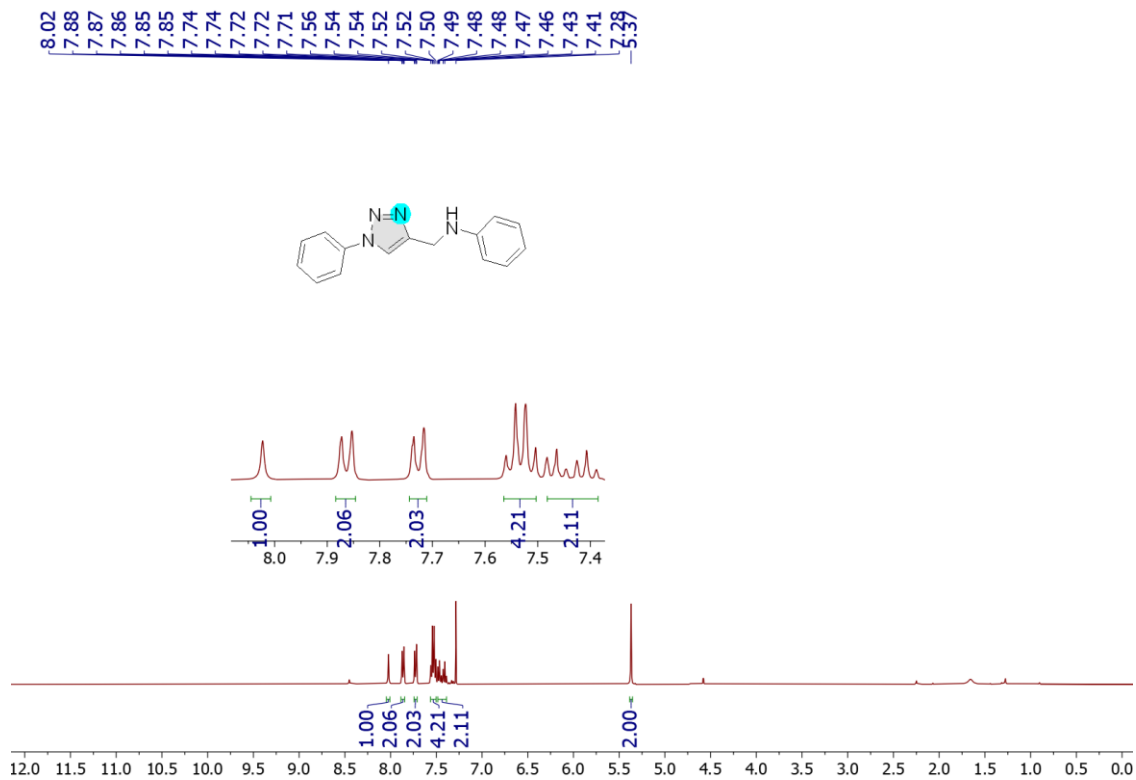

**<sup>13</sup>C-NMR of N-((1-phenyl-1H-1,2,3-triazol-4-yl)methyl)aniline (5a)**

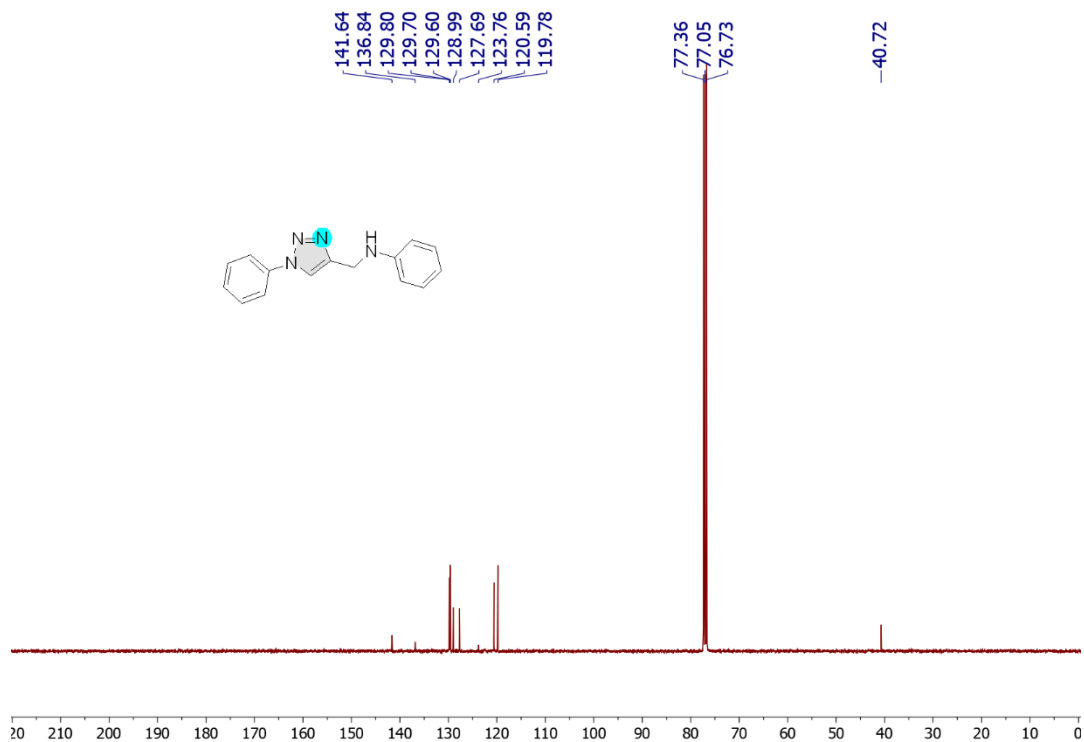

## DEPT of N-((1-phenyl-1H-1,2,3-triazol-4-yl)methyl)aniline (5a)

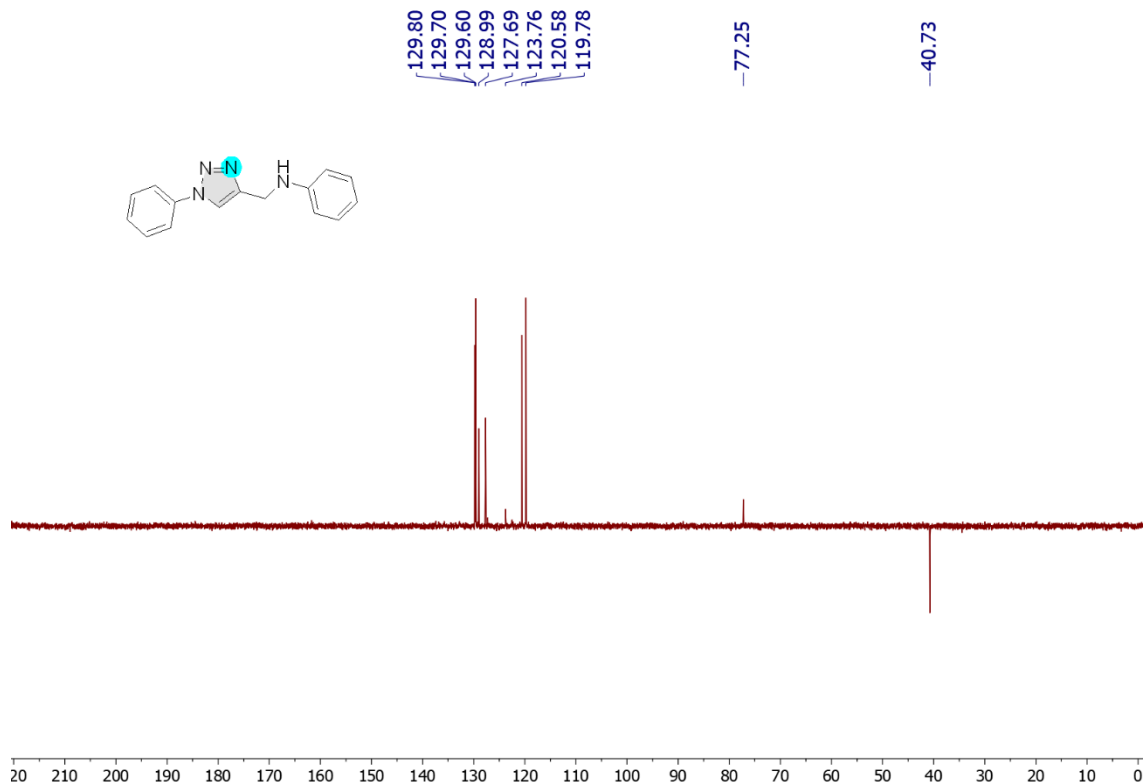

## HRMS of N-((1-phenyl-1H-1,2,3-triazol-4-yl)methyl)aniline (5a)

### Elemental Composition Report

Page 1

### Single Mass Analysis

Tolerance = 50.0 PPM / DBE: min = -1.5, max = 50.0

Element prediction: Off

Number of isotope peaks used for i-FIT = 3

Monoisotopic Mass, Even Electron Ions

8 formula(e) evaluated with 1 results within limits (up to 3 closest results for each mass)

Elements Used:

C: 0-15 H: 0-100 N: 0-4

MS-(NHF) 2

QMI DIVISION, CSIR-IIIM JAMMU  
Xevo G2-XS QTOF YFC2015

30-Apr-2024

12:05:58

1: TOF MS ES+

1.68e+007

300424\_12 5 (0.121)

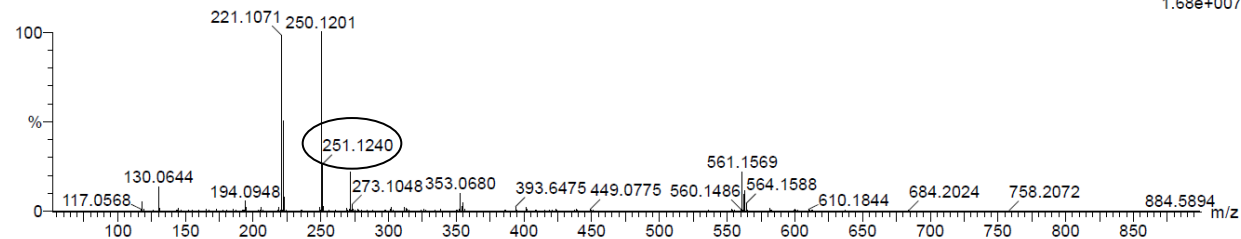

Minimum: -1.5  
Maximum: 2.0 50.0 50.0

| Mass     | Calc. Mass | mDa  | PPM   | DBE  | i-FIT  | Norm | Conf (%) | Formula    |
|----------|------------|------|-------|------|--------|------|----------|------------|
| 251.1240 | 251.1297   | -5.7 | -22.7 | 10.5 | 1427.4 | n/a  | n/a      | C15 H15 N4 |

### <sup>1</sup>H-NMR of 4-((4-(Tert-butyl)phenoxy)methyl)-1-phenyl-1H-1,2,3-triazole (5b)

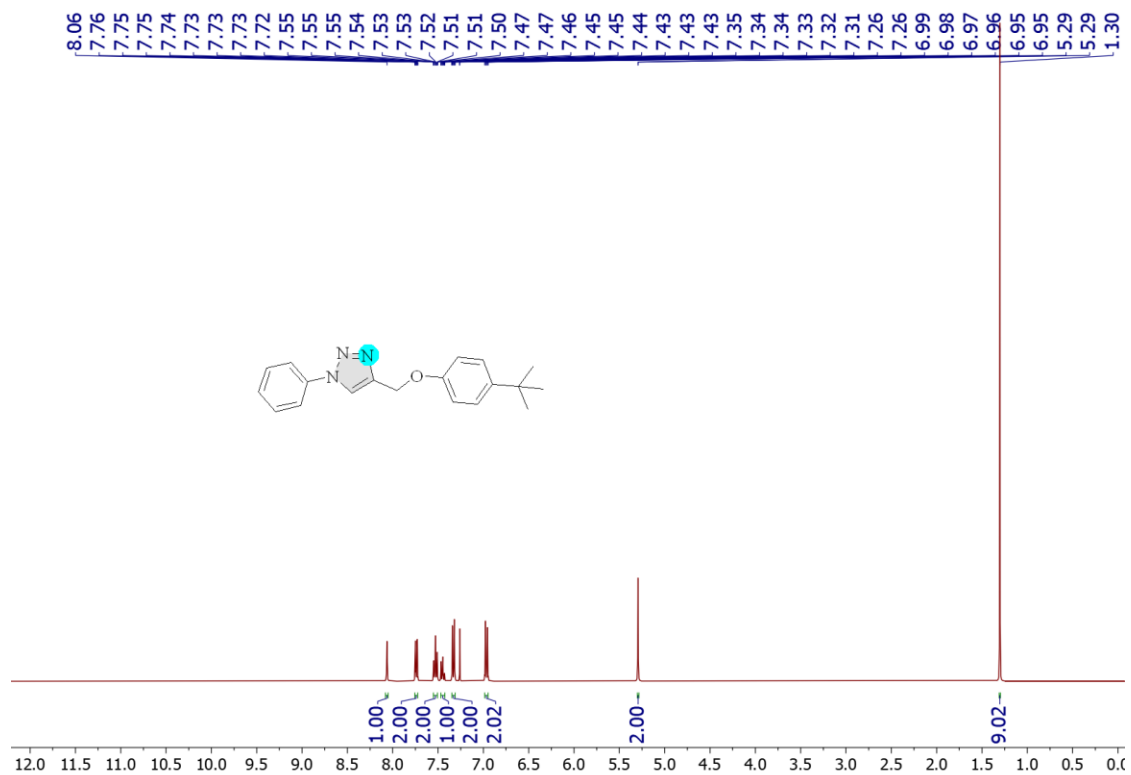

### <sup>13</sup>C-NMR of 4-((4-(Tert-butyl)phenoxy)methyl)-1-phenyl-1H-1,2,3-triazole (5b)

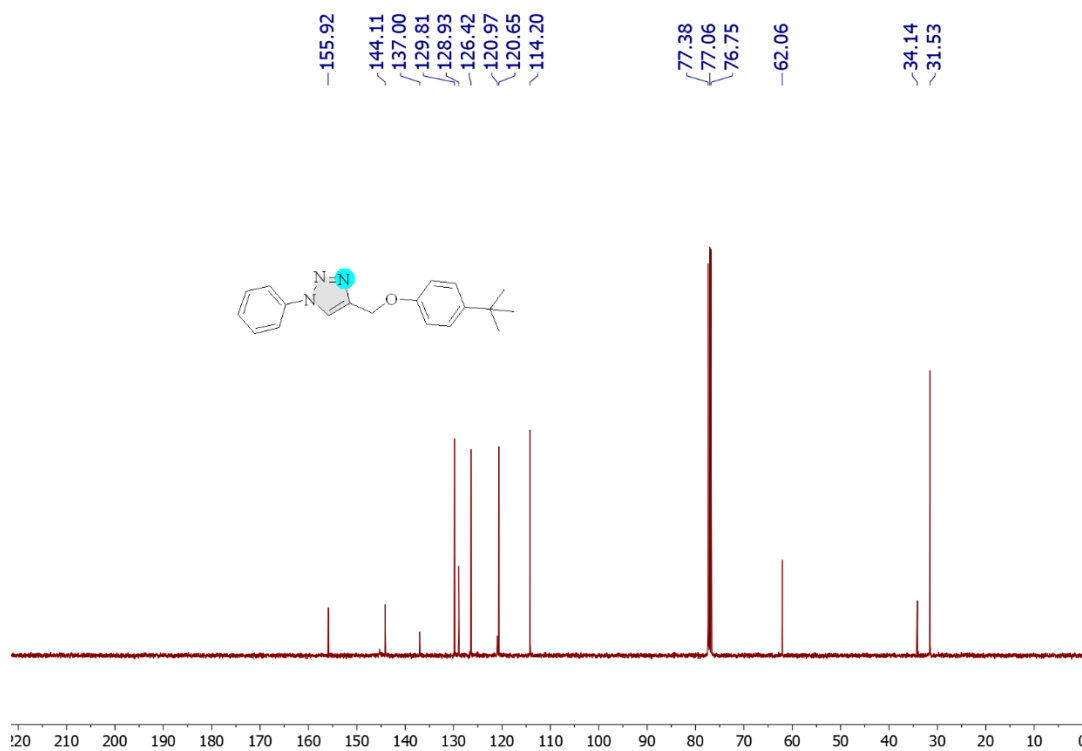

## DEPT of 4-((4-(Tert-butyl)phenoxy)methyl)-1-phenyl-1H-1,2,3-triazole (5b)

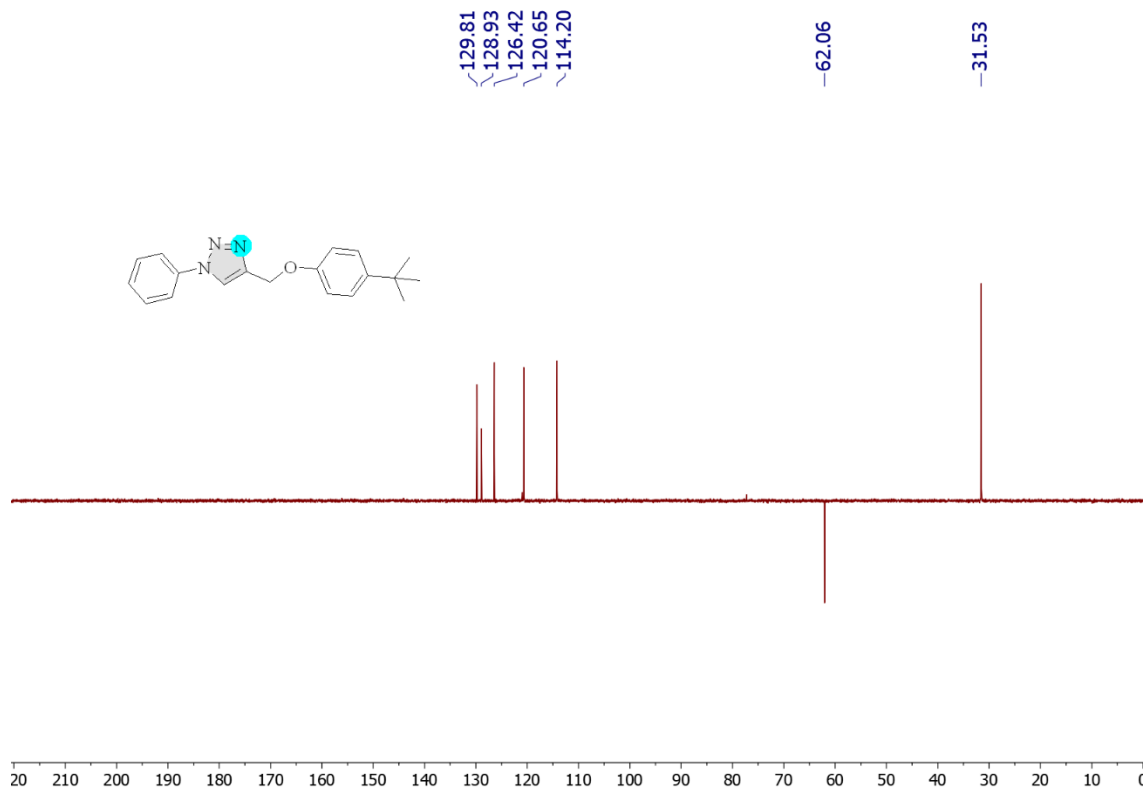

## HRMS of 4-((4-(Tert-butyl)phenoxy)methyl)-1-phenyl-1H-1,2,3-triazole (5b)

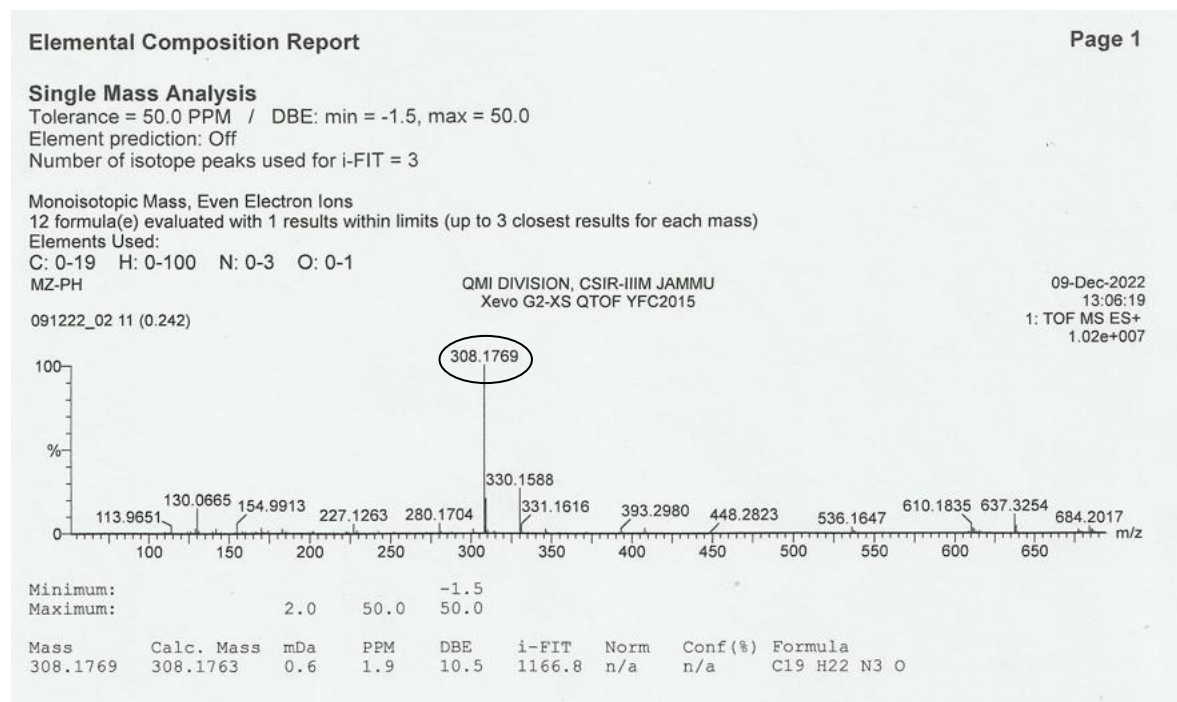

### <sup>1</sup>H-NMR of 1-Phenyl-4-((phenylthio)methyl)-1*H*-1,2,3-triazole (5c)

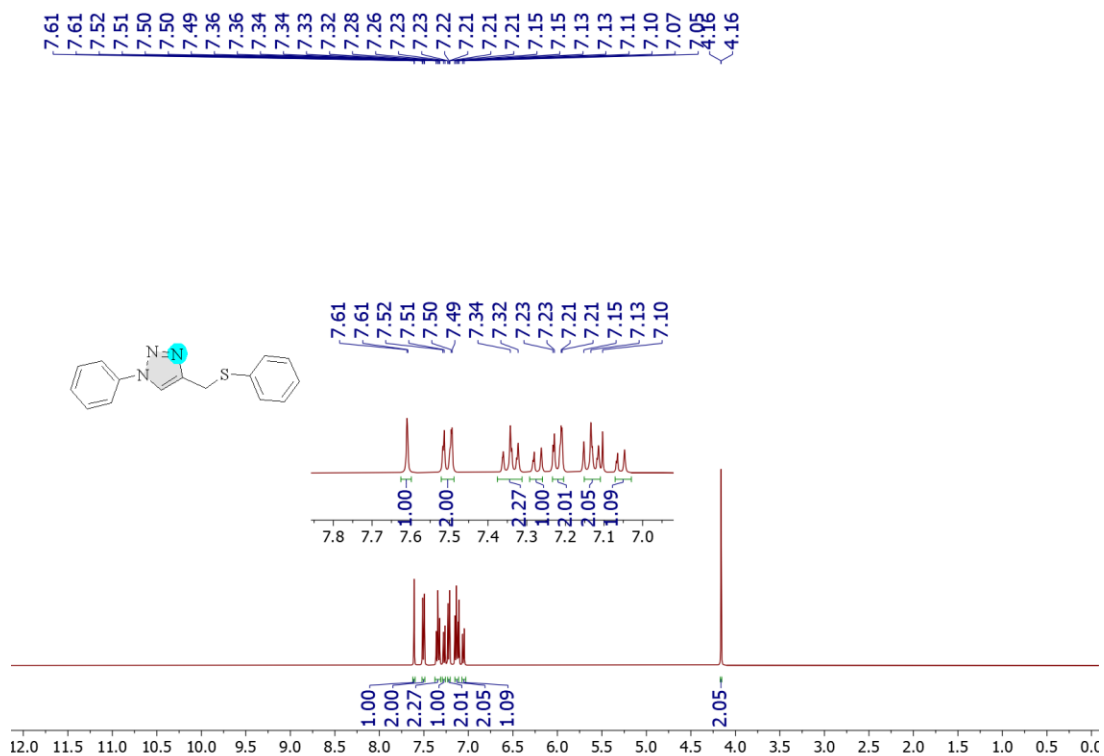

### <sup>13</sup>C-NMR of 1-Phenyl-4-((phenylthio)methyl)-1*H*-1,2,3-triazole (5c)

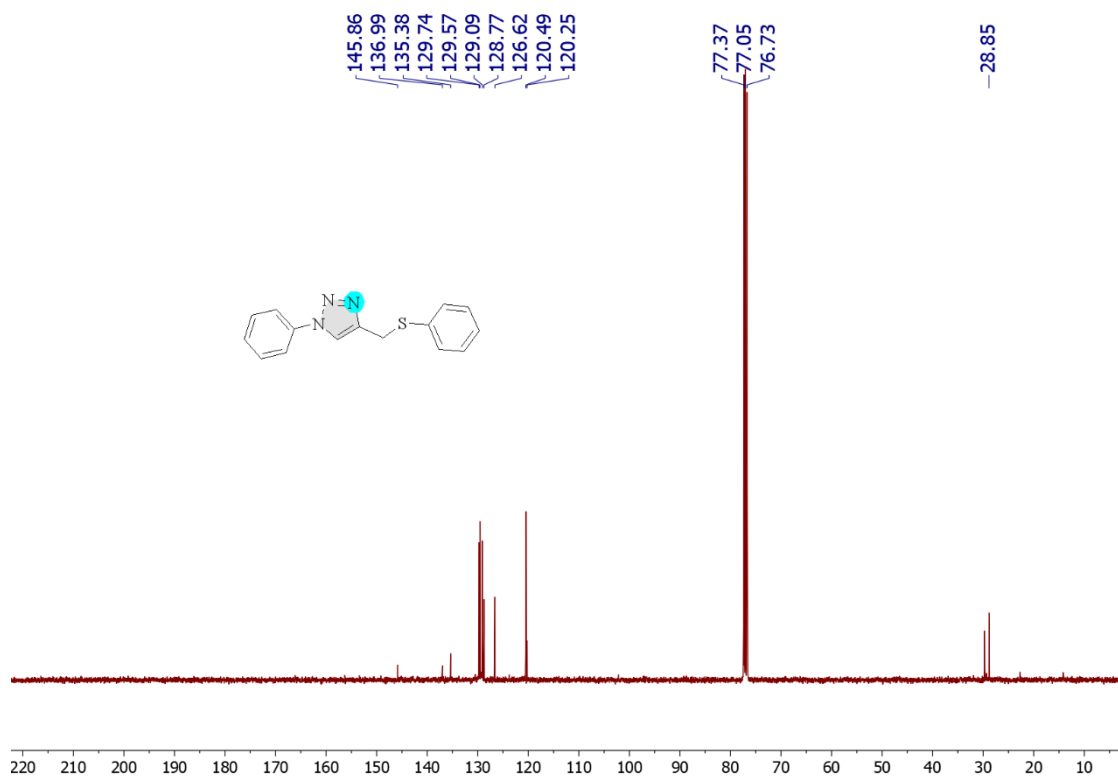

## DEPT of 1-Phenyl-4-((phenylthio)methyl)-1H-1,2,3-triazole (5c)

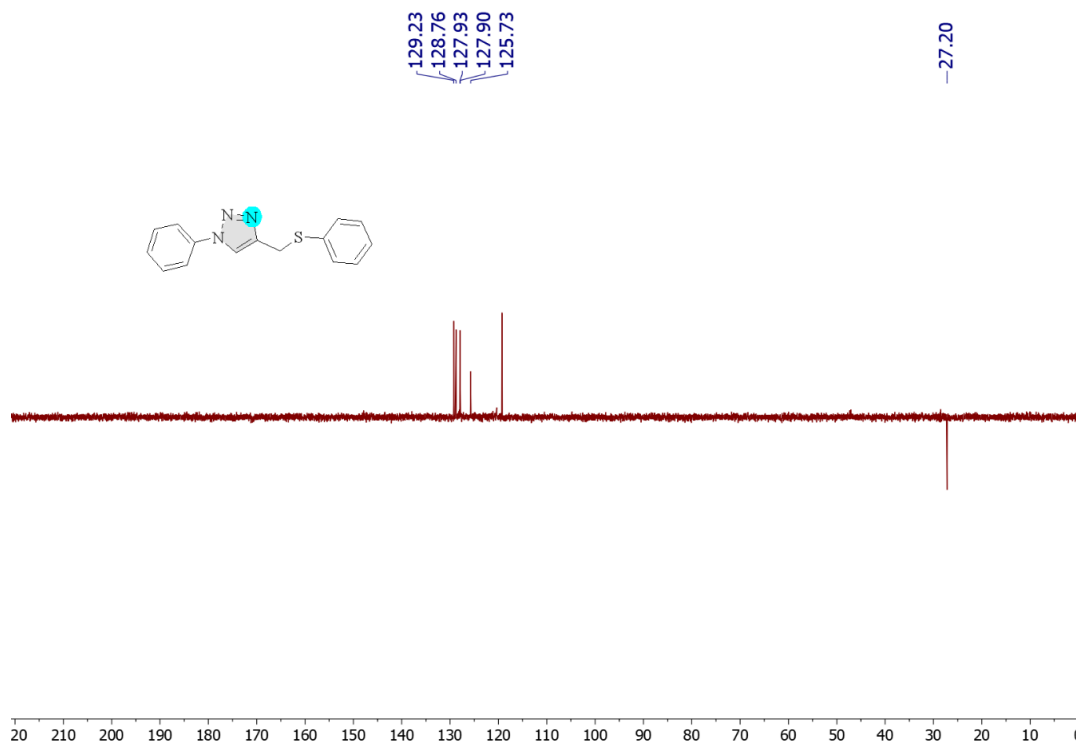

## HRMS of 1-Phenyl-4-((phenylthio)methyl)-1H-1,2,3-triazole (5c)

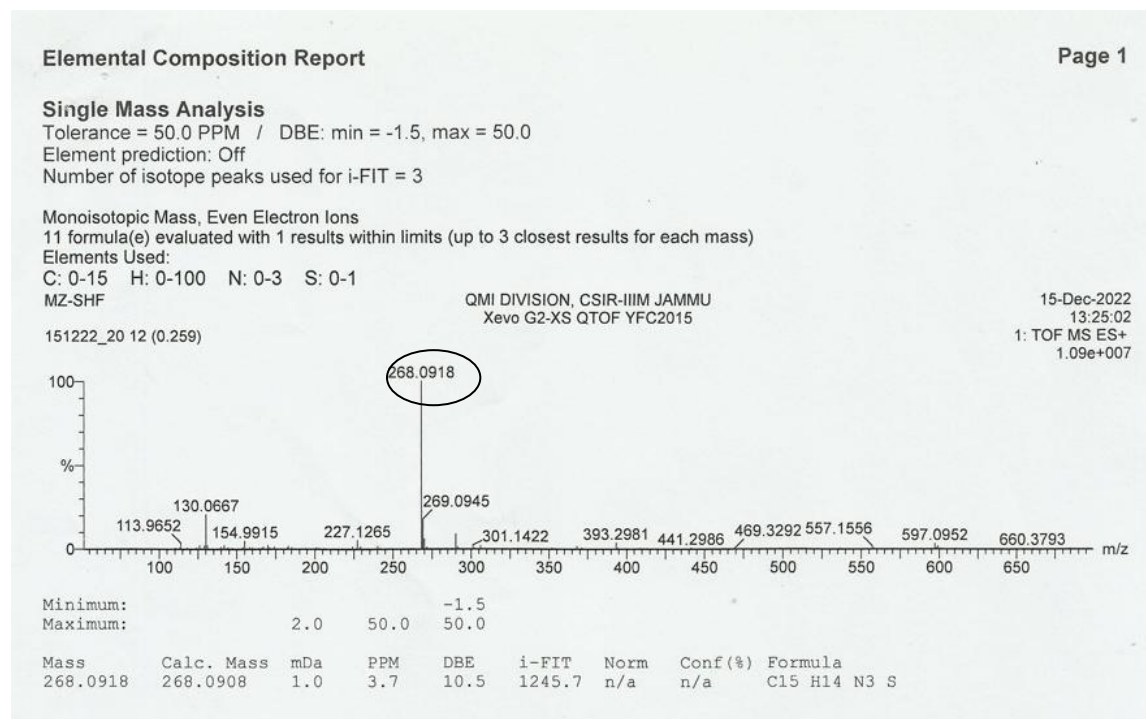

**<sup>1</sup>H-NMR of 4-((1-Phenyl-1*H*-1,2,3-triazol-4-yl)methoxy)-2*H*-chromen-2-one (6a)**

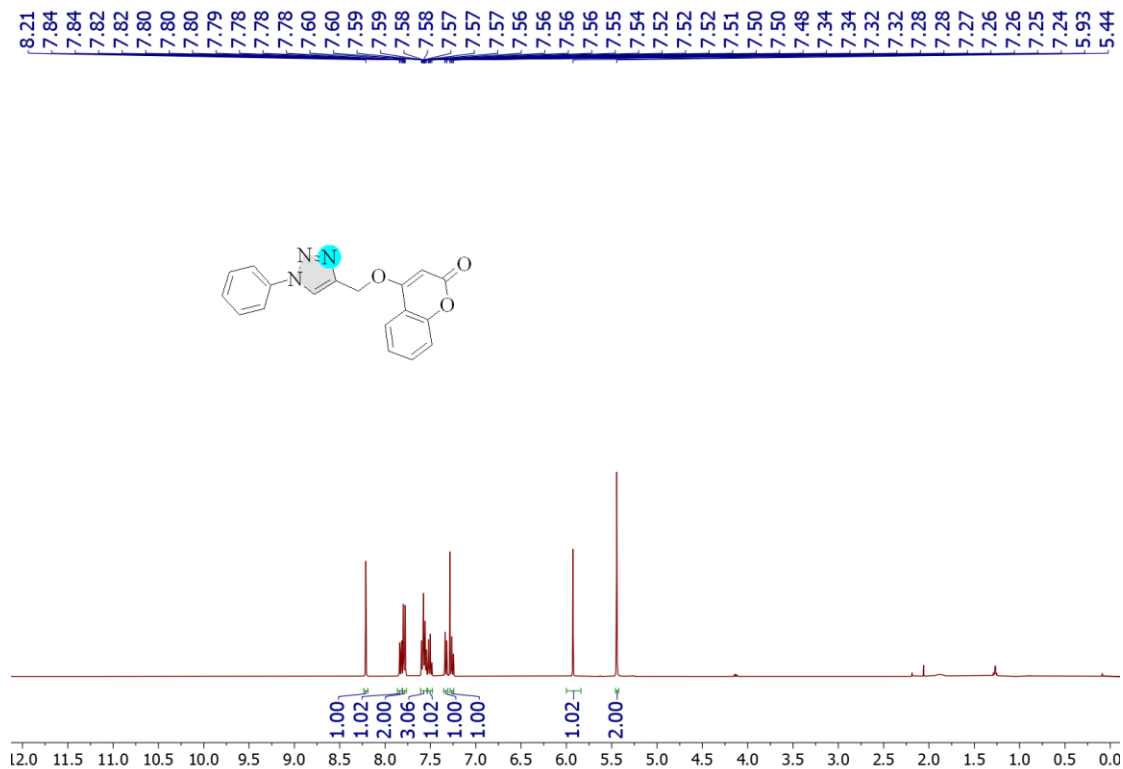

**<sup>13</sup>C-NMR of 4-((1-Phenyl-1*H*-1,2,3-triazol-4-yl)methoxy)-2*H*-chromen-2-one (6a)**

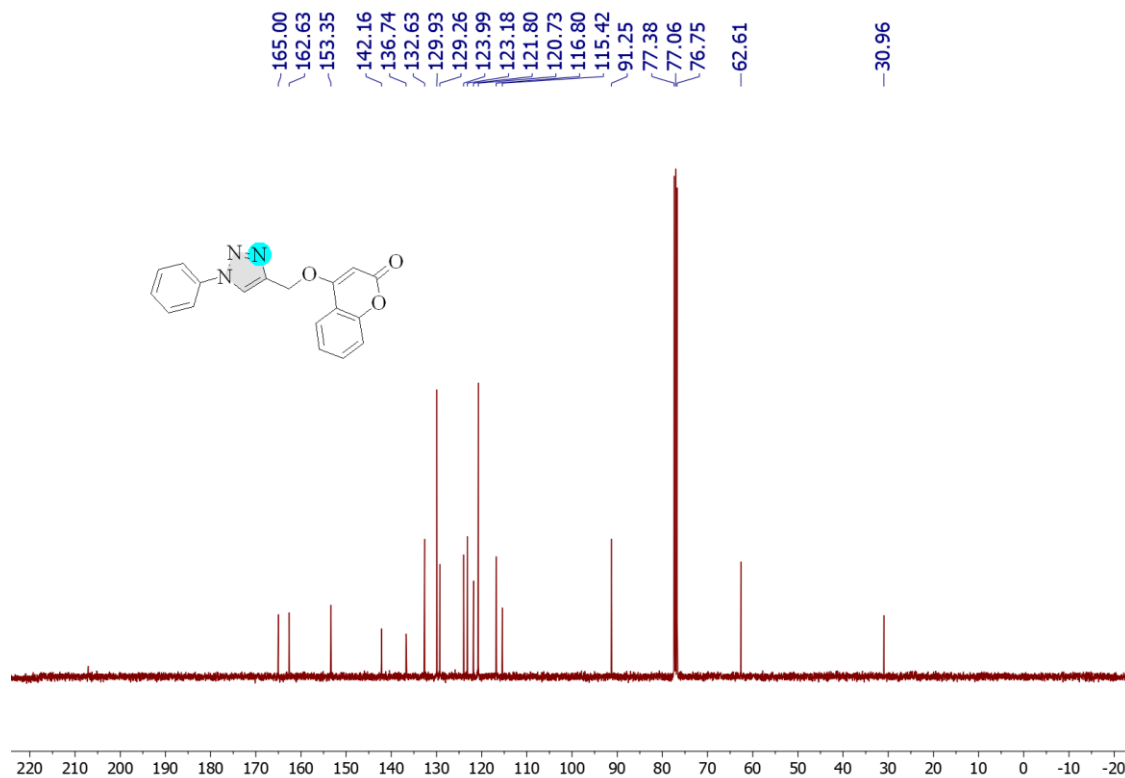

## DEPT of 4-((1-Phenyl-1H-1,2,3-triazol-4-yl)methoxy)-2H-chromen-2-one (6a)

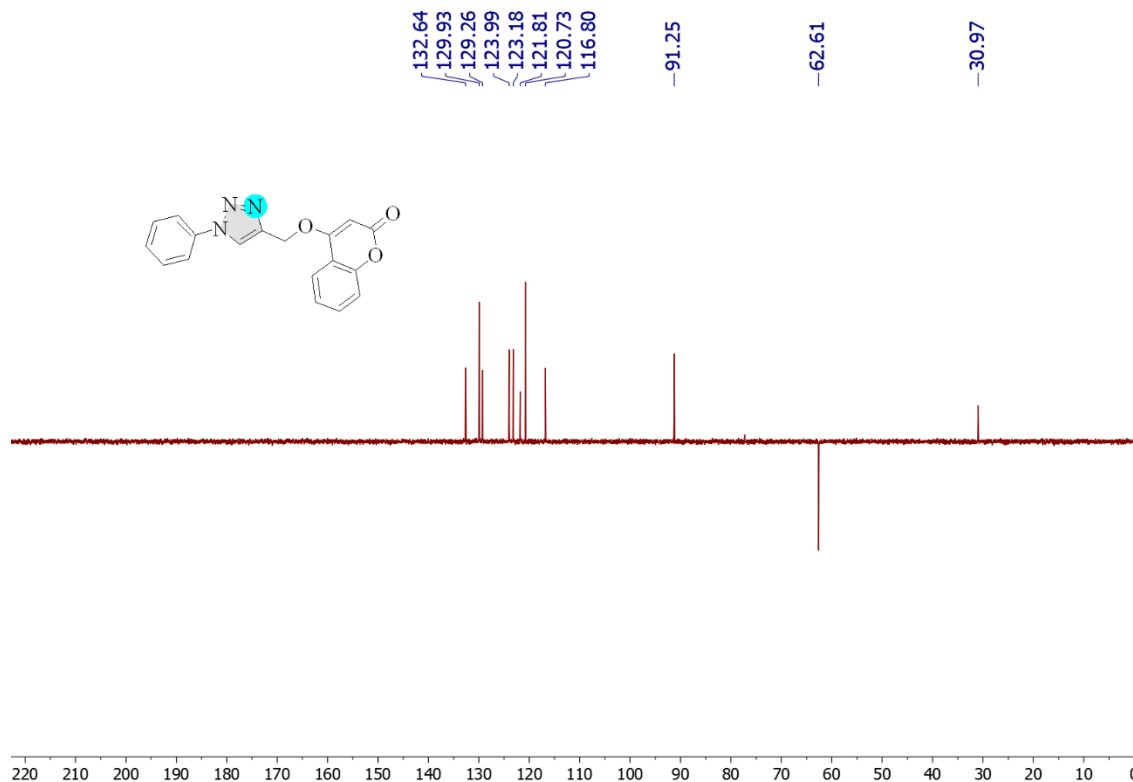

## HRMS of 4-((1-Phenyl-1H-1,2,3-triazol-4-yl)methoxy)-2H-chromen-2-one (6a)

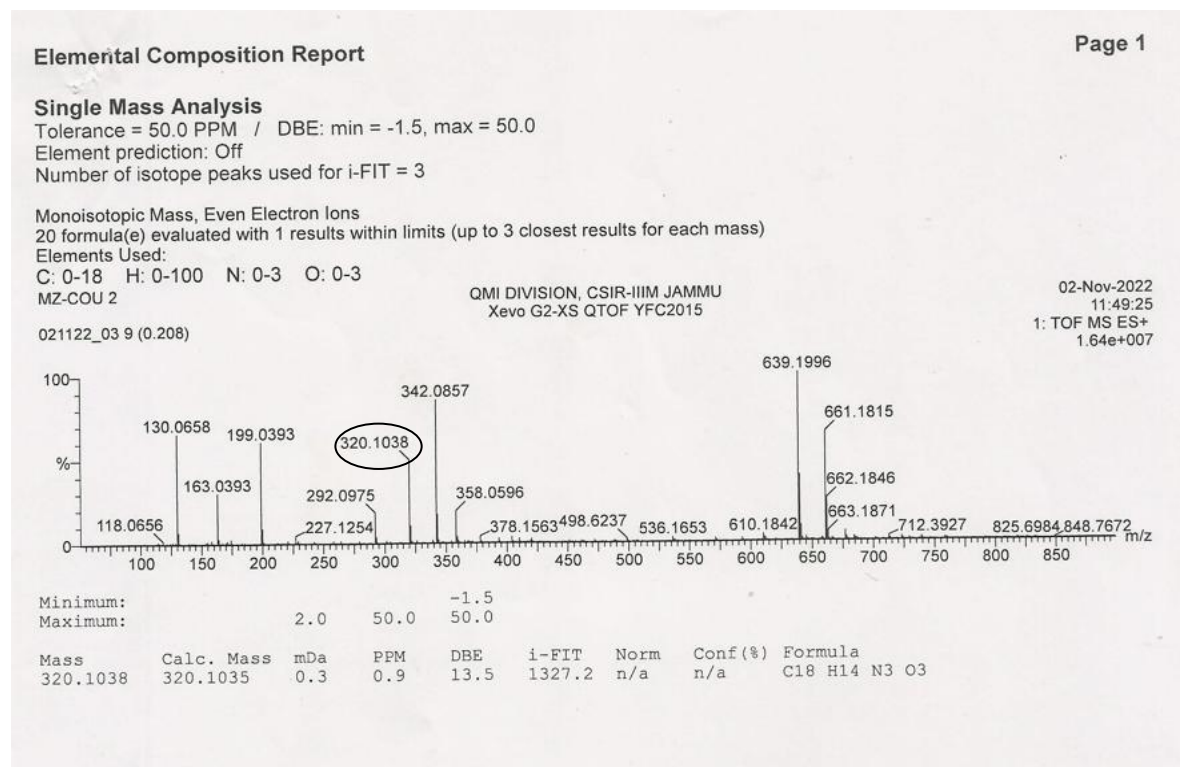

**<sup>1</sup>H-NMR of 4-((4-Allyl-2-methoxyphenoxy)methyl)-1-phenyl-1H-1,2,3-triazole (6b)**

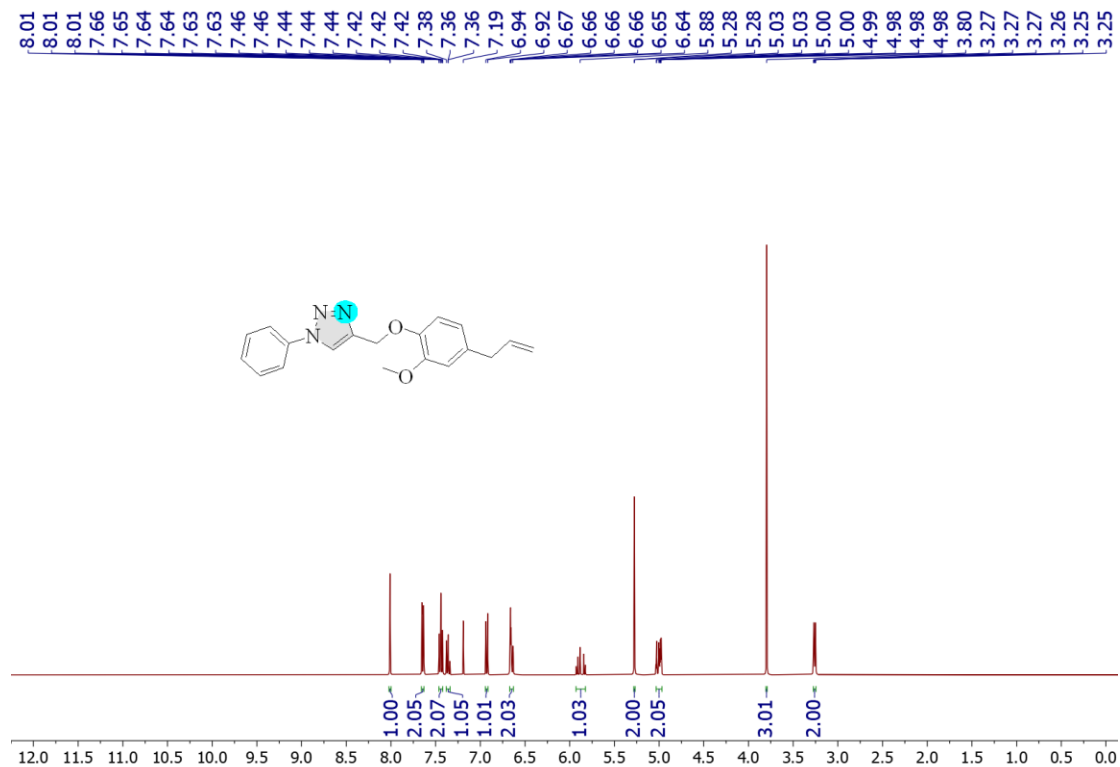

**<sup>13</sup>C-NMR of 4-((4-Allyl-2-methoxyphenoxy)methyl)-1-phenyl-1H-1,2,3-triazole (6b)**

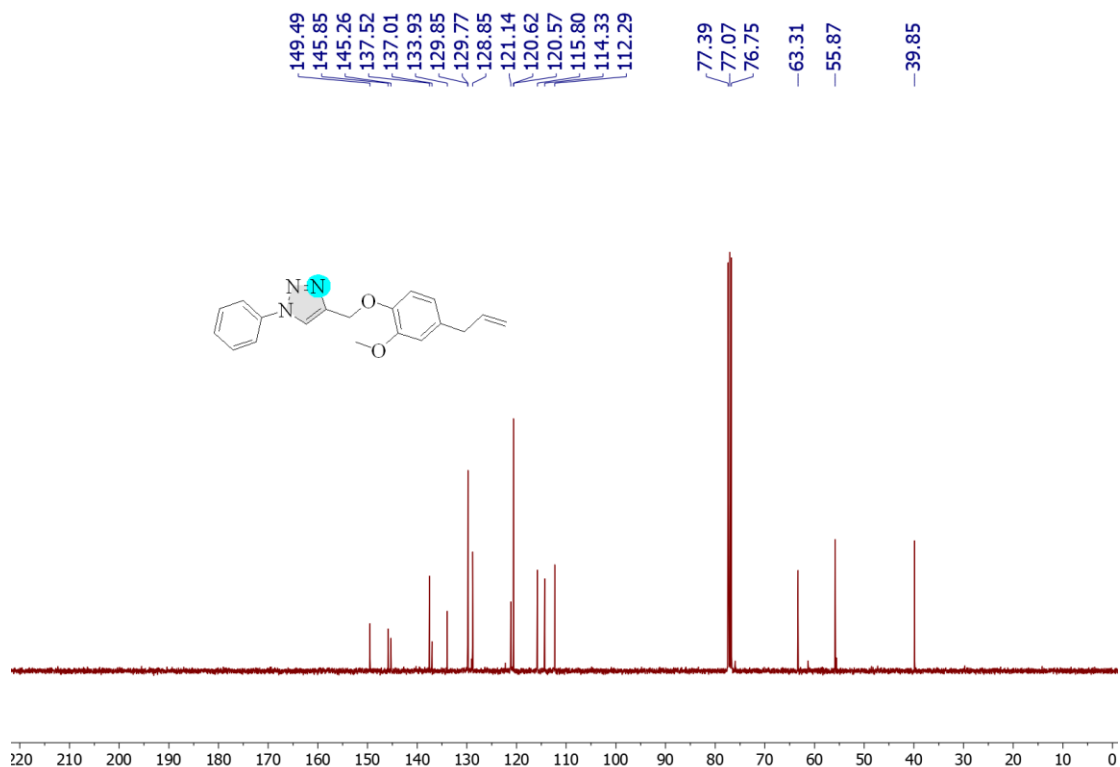

## DEPT of 4-((4-Allyl-2-methoxyphenoxy)methyl)-1-phenyl-1H-1,2,3-triazole (6b)

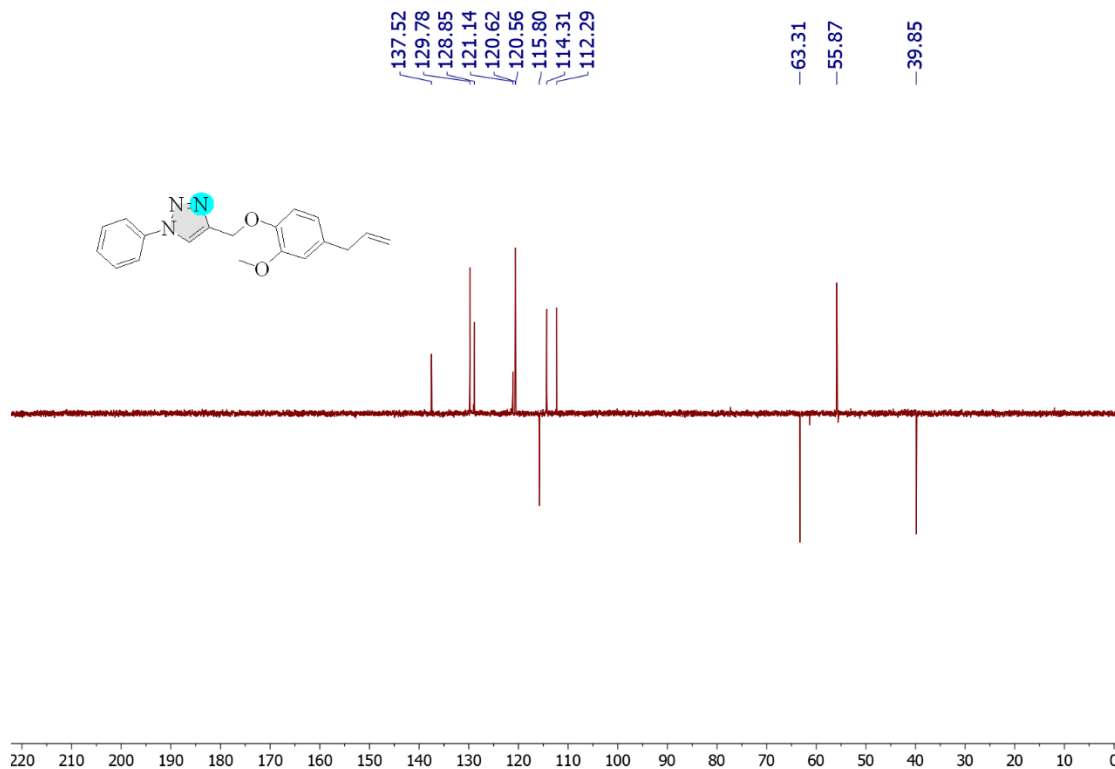

## HRMS of 4-((4-Allyl-2-methoxyphenoxy)methyl)-1-phenyl-1H-1,2,3-triazole (6b)

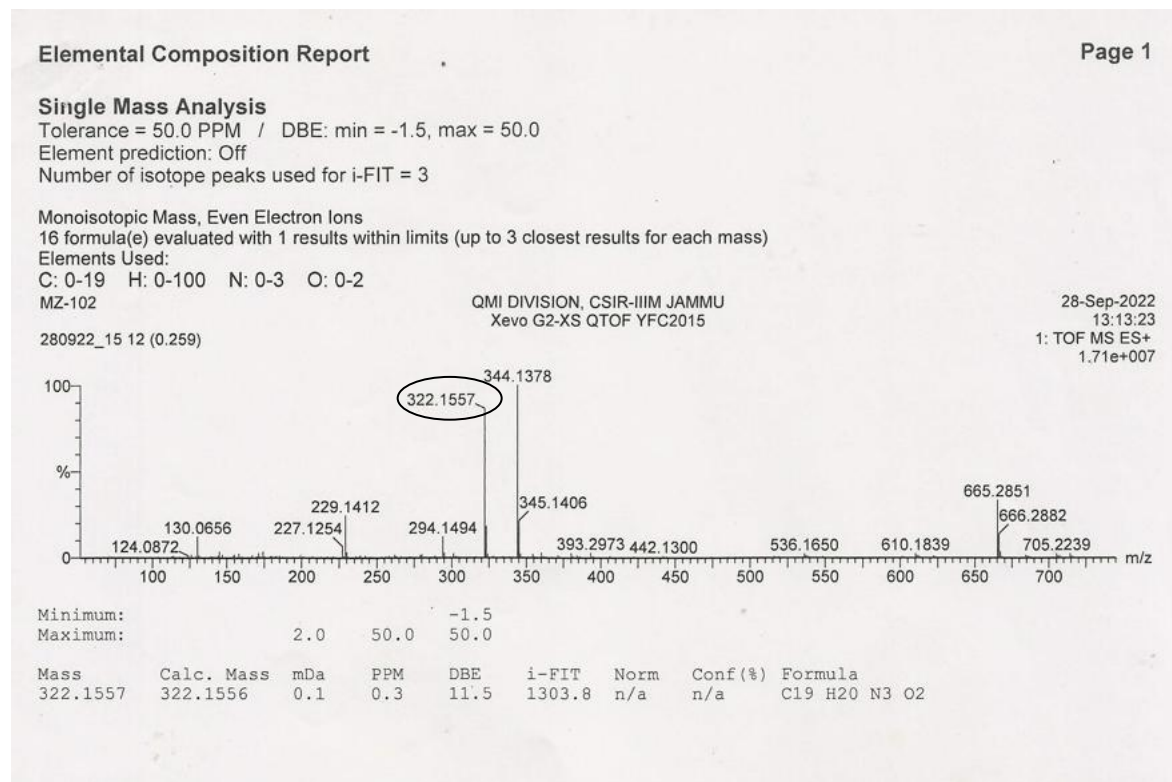

**<sup>1</sup>H NMR of 4-((2-Isopropyl-5-methylphenoxy)methyl)-1-phenyl-1H-1,2,3-triazole (6c)**

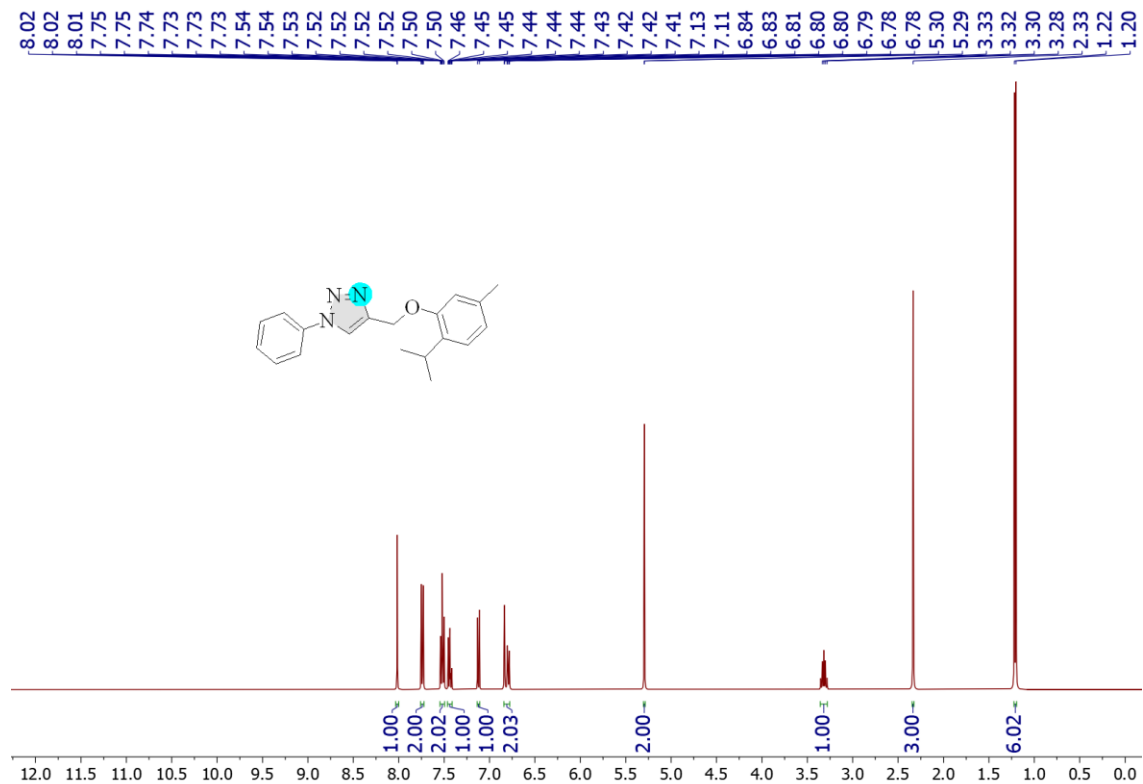

**<sup>13</sup>C NMR of 4-((2-Isopropyl-5-methylphenoxy)methyl)-1-phenyl-1H-1,2,3-triazole (6c)**

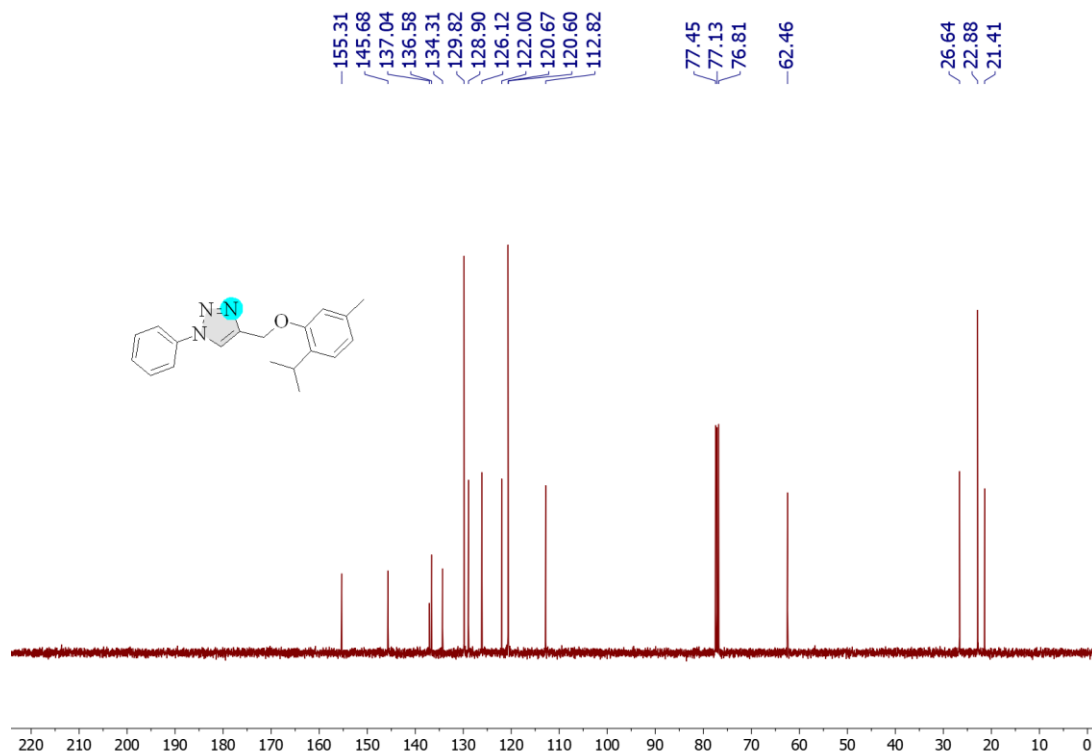

**DEPT of 4-((2-Isopropyl-5-methylphenoxy)methyl)-1-phenyl-1H-1,2,3-triazole (6c)**

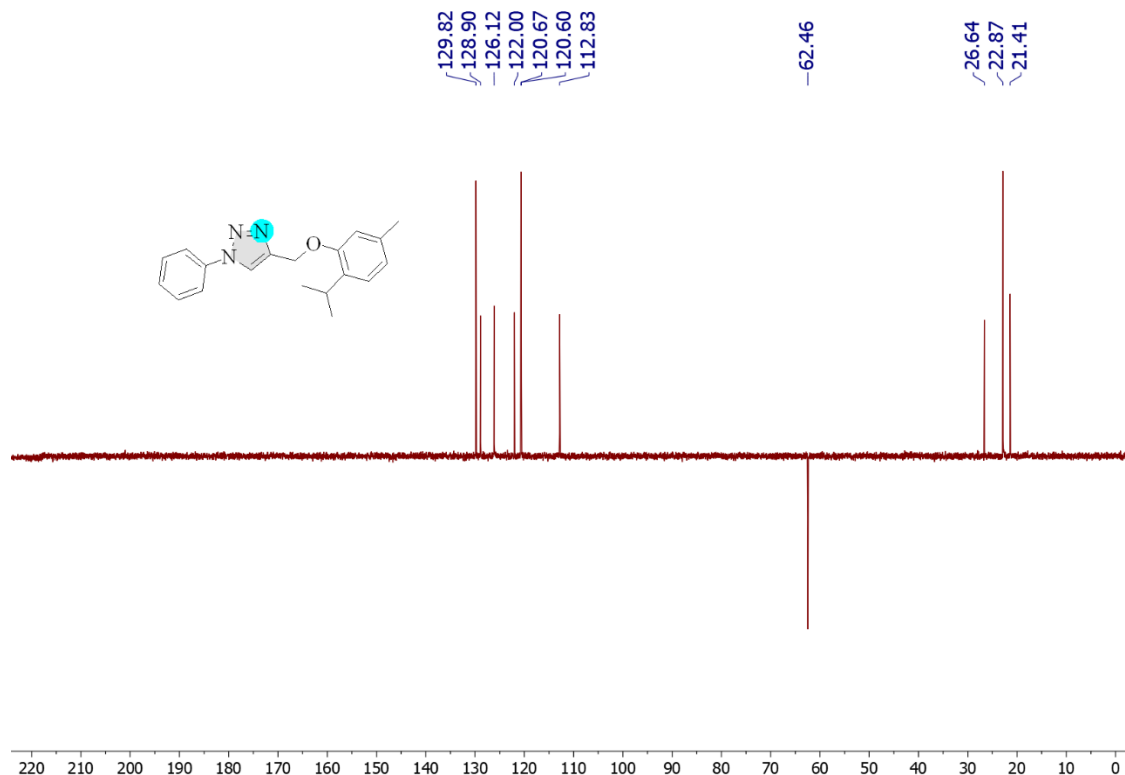

**HRMS of 4-((2-Isopropyl-5-methylphenoxy)methyl)-1-phenyl-1H-1,2,3-triazole (6c)**

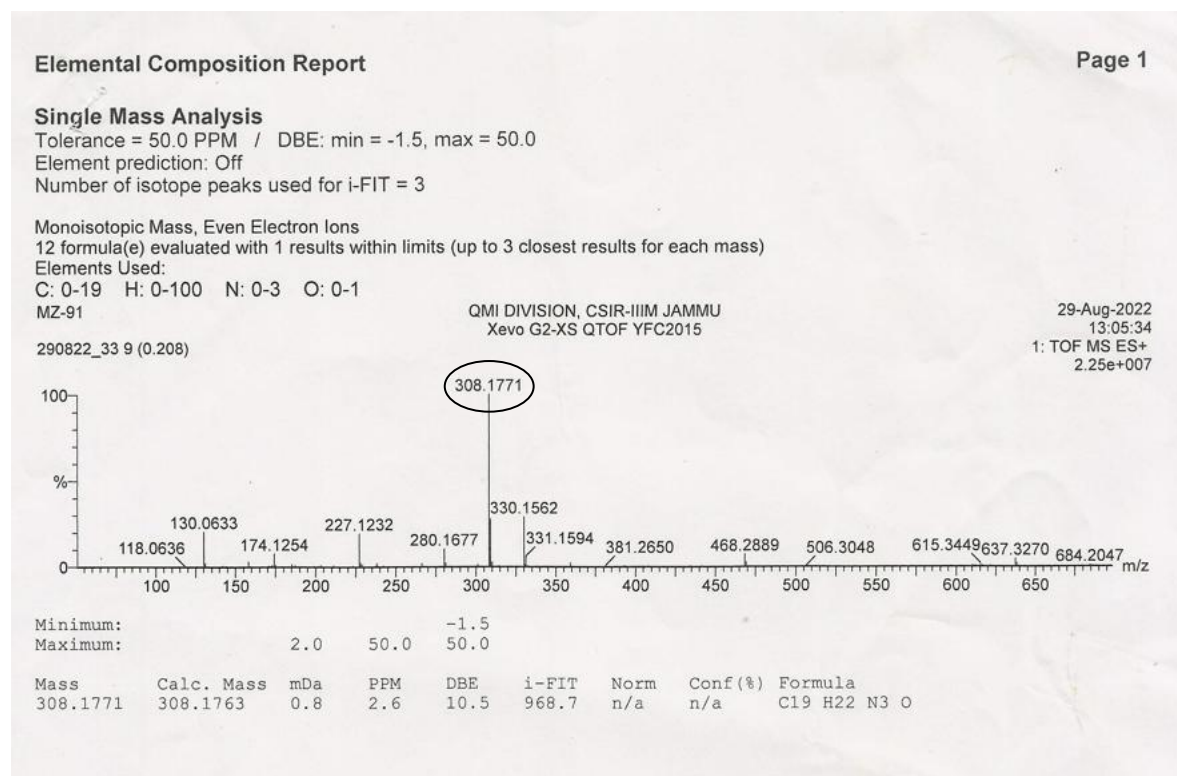

**<sup>1</sup>H-NMR of (2S,3S,4S,4aR,10bR)-9-Methoxy-6-oxo-2-(((1-phenyl-1H-1,2,3-triazol-4-yl)methoxy)methyl)-2,3,4,4a,6,10b-hexahydropyrano[3,2-c]isochromene-3,4,8,10-tetrayl tetraacetate (6d)**

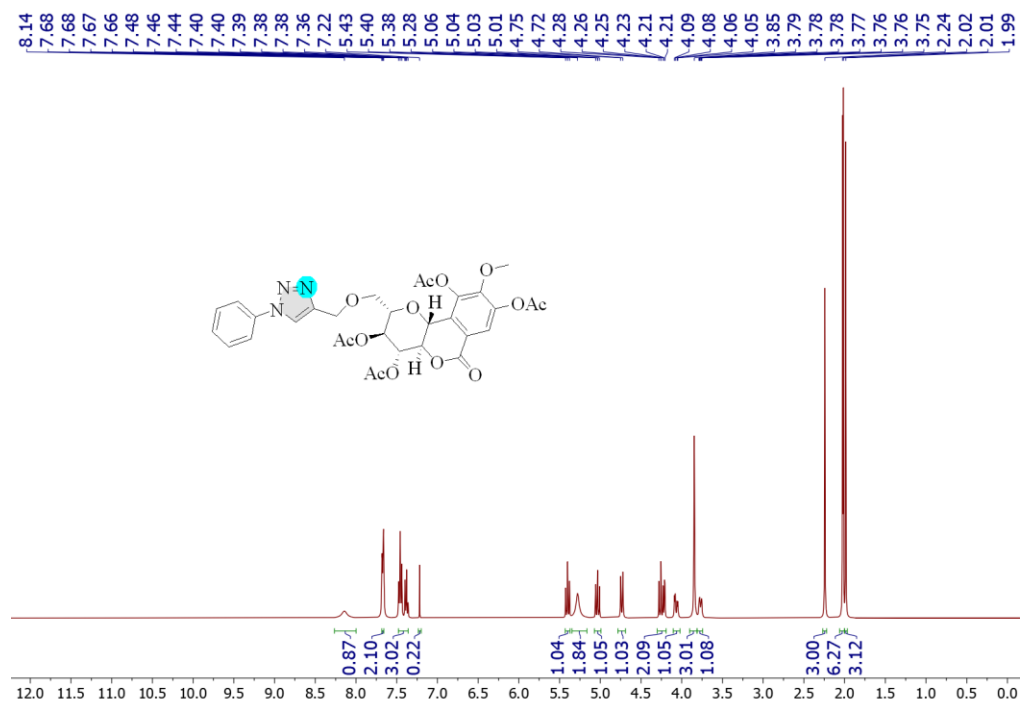

**<sup>13</sup>C-NMR of (2S,3S,4S,4aR,10bR)-9-Methoxy-6-oxo-2-(((1-phenyl-1H-1,2,3-triazol-4-yl)methoxy)methyl)-2,3,4,4a,6,10b-hexahydropyrano[3,2-c]isochromene-3,4,8,10-tetrayl tetraacetate (6d)**

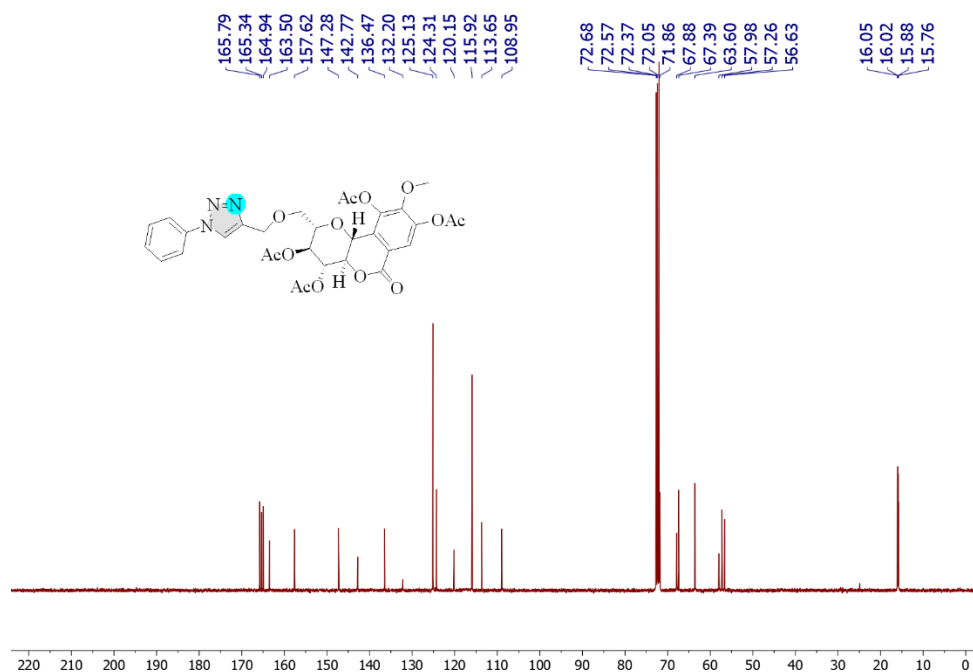

**DEPT of (2S,3S,4S,4aR,10bR)-9-Methoxy-6-oxo-2-(((1-phenyl-1H-1,2,3-triazol-4-yl)methoxy)methyl)-2,3,4,4a,6,10b-hexahydropyrano[3,2-c]isochromene-3,4,8,10-tetrayl tetraacetate (6d)**

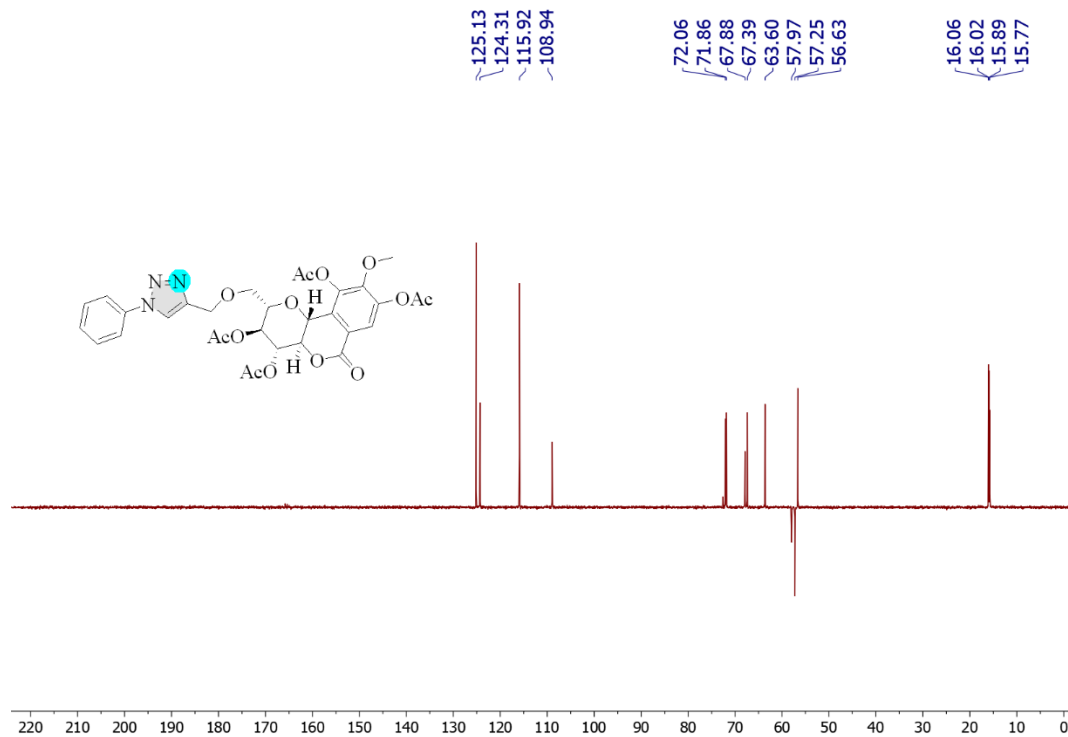

**HRMS of (2S,3S,4S,4aR,10bR)-9-Methoxy-6-oxo-2-(((1-phenyl-1H-1,2,3-triazol-4-yl)methoxy)methyl)-2,3,4,4a,6,10b-hexahydropyrano[3,2-c]isochromene-3,4,8,10-tetrayl tetraacetate (6d)**

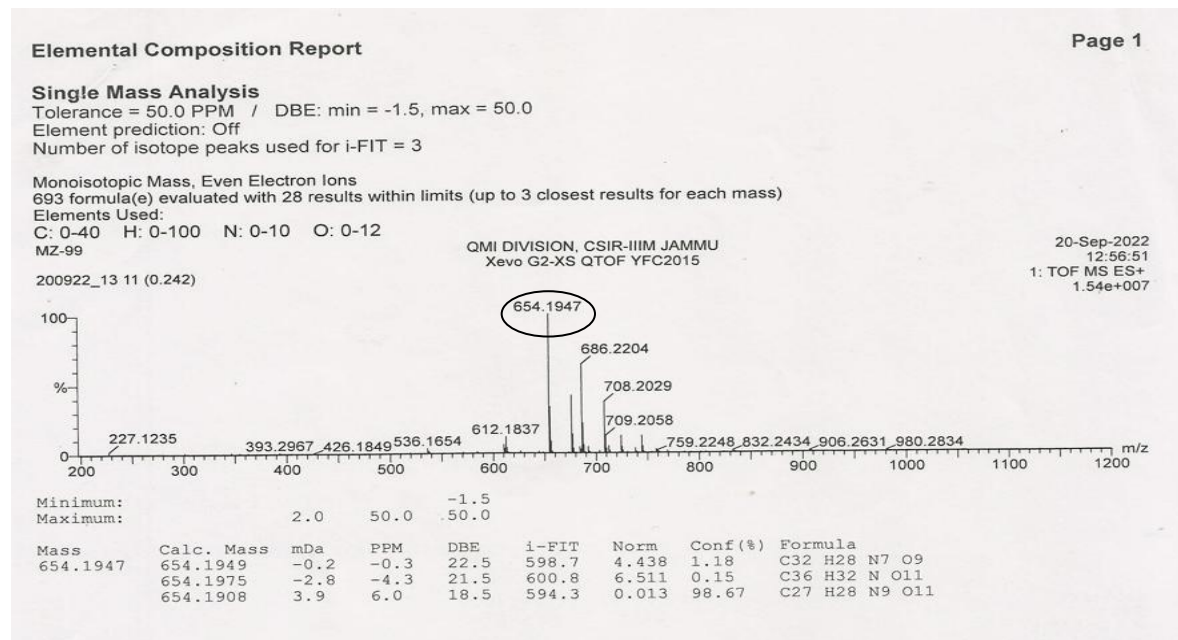

**<sup>1</sup>H-NMR of (E)-4-(((3,7-Dimethylocta-2,6-dien-1-yl)oxy)methyl)-1-phenyl-1H-1,2,3-triazole (6e)**

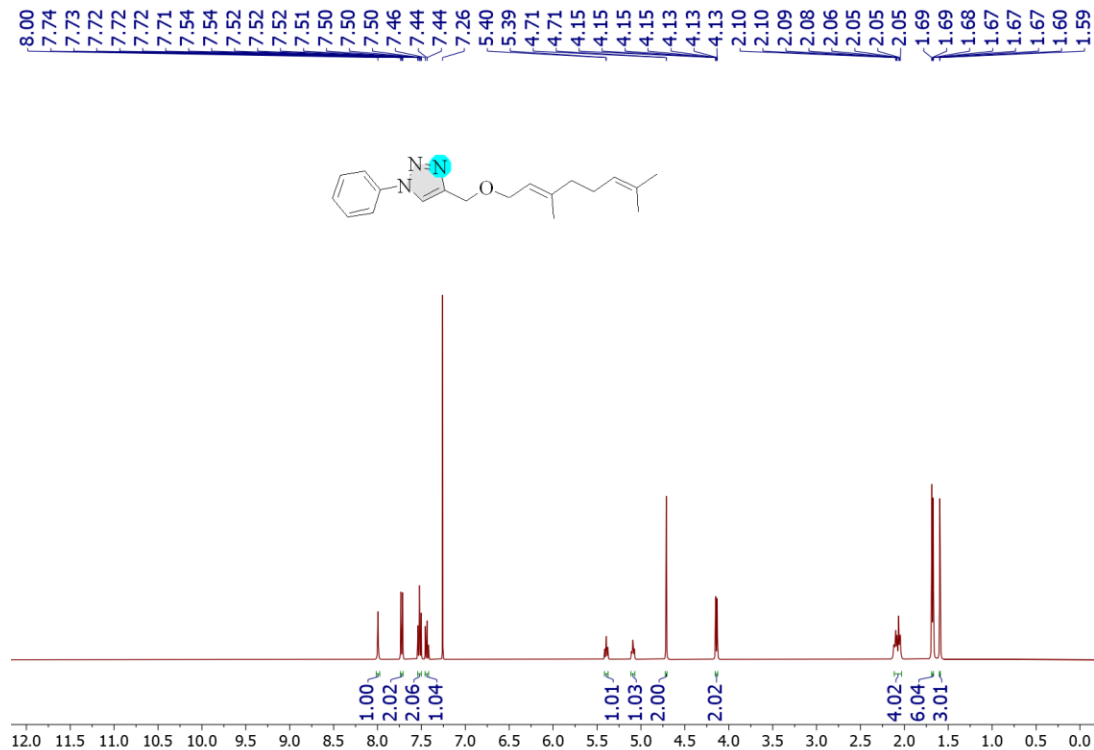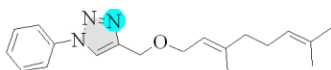

**<sup>13</sup>C-NMR of (E)-4-(((3,7-Dimethylocta-2,6-dien-1-yl)oxy)methyl)-1-phenyl-1H-1,2,3-triazole (6e)**

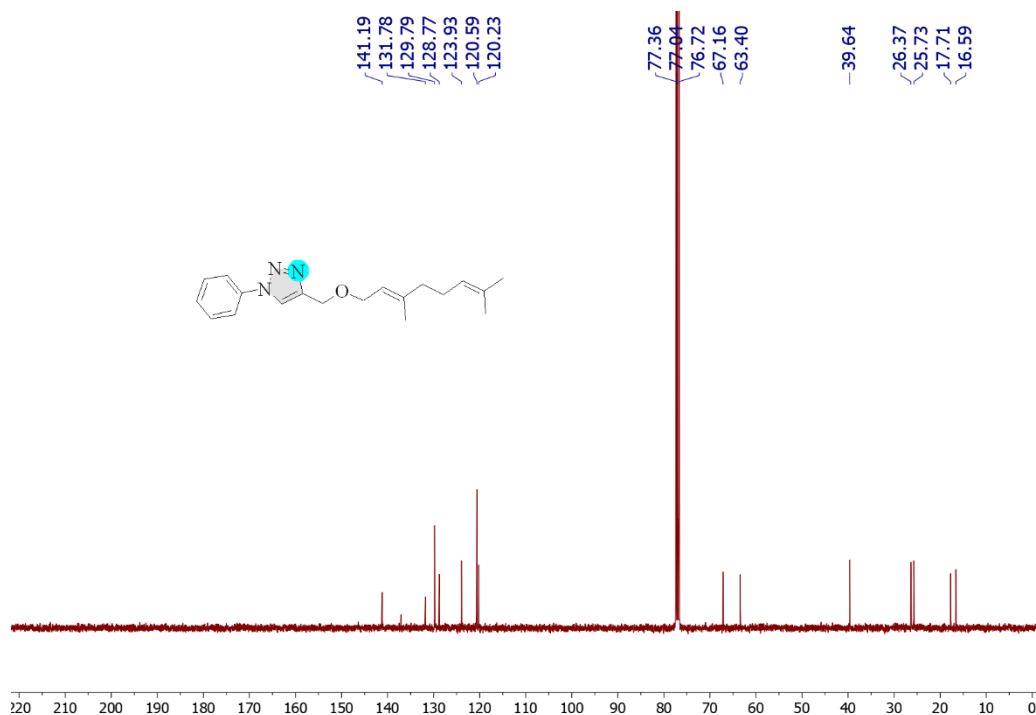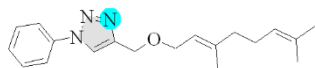

**DEPT of (E)-4-(((3,7-Dimethylocta-2,6-dien-1-yl)oxy)methyl)-1-phenyl-1H-1,2,3-triazole (6e)**

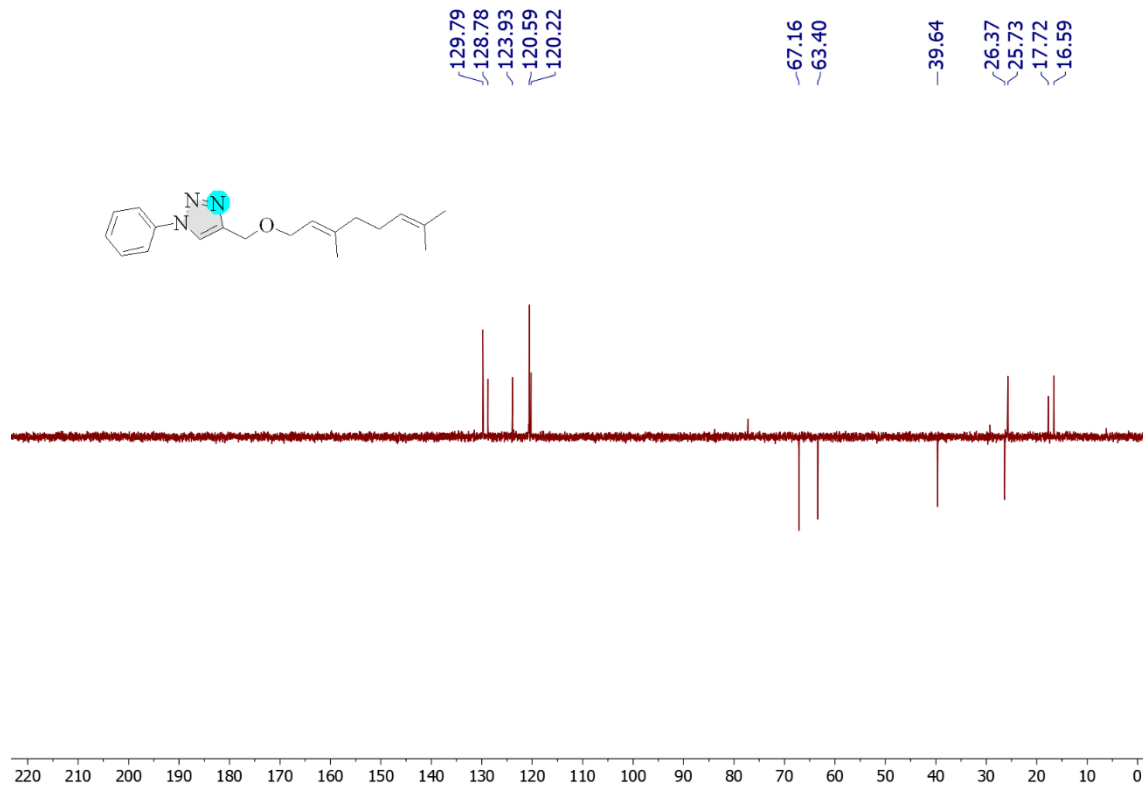

**HRMS of (E)-4-(((3,7-Dimethylocta-2,6-dien-1-yl)oxy)methyl)-1-phenyl-1H-1,2,3-triazole (6e)**

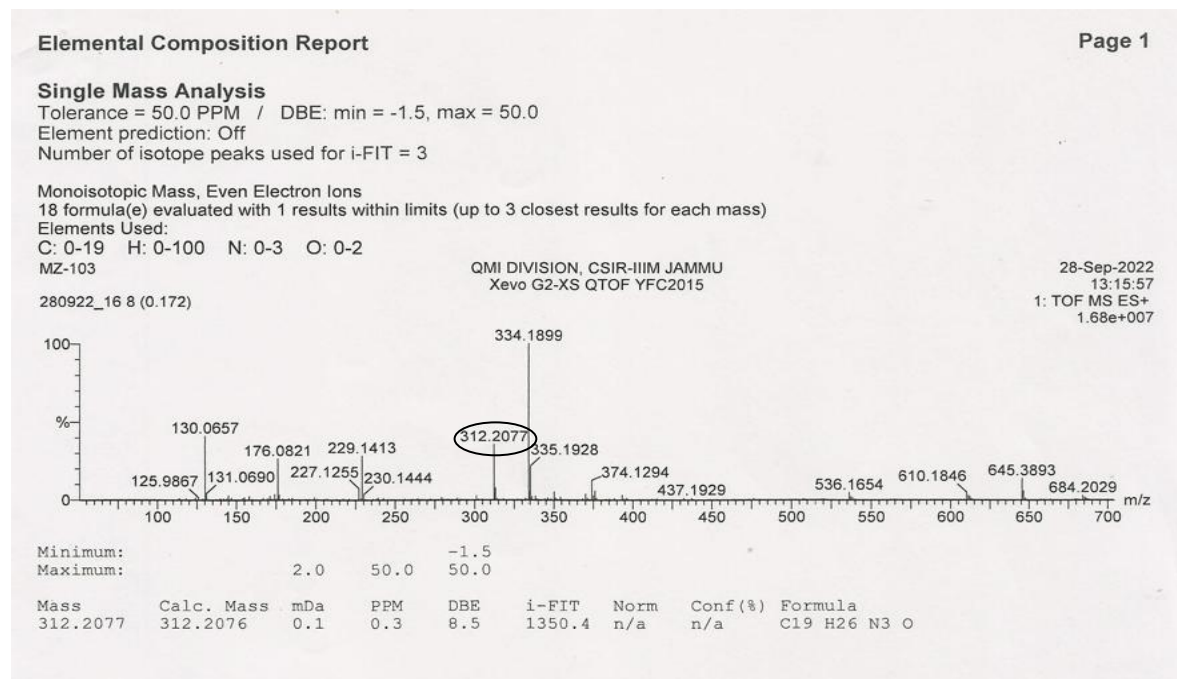

## References:

1. D. Drelinkiewicz and R. J. Whitby, *RSC Adv.*, 2022, **12**, 28910–28915.
2. D. Wang, N. Li, M. Zhao, W. Shi, C. Ma and B. Chen, *Green Chem.*, 2010, **12**, 2120–2123.
3. B. Kaboudin, R. Mostafalu and T. Yokomatsu, *Green Chem.*, 2013, **15**, 2266–2274.
4. D. B. Ramachary, A. B. Shashank and S. Karthik, *Angew. Chem. Int. Ed.*, 2014, **53**, 10420–10424.
5. G. Chakraborti, R. Jana, T. Mandal, A. Datta and J. Dash, *Org. Chem. Front.*, 2021, **8**, 2434–2441.
6. S. Potratz, A. Mishra and P. Bäuerle, *Beilstein J. Org. Chem.*, 2012, **8**, 683–692.
7. P. Sambasiva Rao, C. Kurumurthy, B. Veeraswamy, G. Santhosh Kumar, Y. Poornachandra, C. Ganesh Kumar, S. B. Vasamsetti, S. Kotamraju and B. Narsaiah, *Eur. J. Med. Chem.*, 2014, **80**, 184–191.
8. C. P. Kaushik and J. Sangwan, *Synth. Commun.*, 2021, **51**, 3403–3415.
9. P. López-Rojas, M. Janeczko, K. Kubiński, Á. Amesty, M. Maslyk and A. Estévez-Braun, *Molecules*, 2018, **23**, 199.
10. M. M. Alam, A. M. Malebari, N. Syed, T. Neamatallah, A. S. A. Almalki, A. A. Elhenawy, R. J. Obaid and M. A. Alsharif, *Bioorg. Med. Chem.*, 2021, **38**, 116136.
11. N. R. Modugu and P. K. Pittala, *New J. Chem.*, 2017, **41**, 14062–14066.
12. A. R. Tiwari and B. M. Bhanage, *Green Chem.*, 2016, **18**, 144–149.
13. S. Chandrasekhar, C. Narsihmulu, S. S. Sultana and N. R. Reddy, *Org. Lett.*, 2002, **4**, 4399–4401.
14. R. A. Sheldon, *Green Chem.*, 2023, **25**, 1704–1728.
15. X. Zhong, G. Dou and D. Wang, *Molecules*, 2013, **18**, 13139–13147.
16. C. R. Santhosh, S. Chinnam, H. S. Chaudhari, K. V. G. C. Sekhar, G. O. Odusel, V. Ahuja, K. Chidambaram, N. Kerru and G. M. Madhu, *J. Mol. Struct.*, 2025, **1346**, 143201.
17. P. Ramesh and K. Bhaskar, *J. Chem. Pharm. Res.*, 2013, **5**, 314–321.
18. B. Kaboudin, Y. Abedi and T. Yokomatsu, *Org. Biomol. Chem.*, 2012, **10**, 4543–4548.
19. A. K. Feldman, B. Colasson and V. V. Fokin, *Org. Lett.*, 2004, **6**, 3897–3899.
20. N. Mukherjee, S. Ahammed, S. Bhadra and B. C. Ranu, *Green Chem.*, 2013, **15**, 389–397.
21. J.-C. Castillo, N.-F. Bravo, L.-V. Tamayo, P.-D. Mestizo, J. Hurtado, M. Macías and J. Portilla, *ACS Omega*, 2020, **5**, 30148–30159.
